# Supplementary material for: VPB1 Encoding BELL-like Homeodomain Protein Is Involved in Rice Panicle Architecture
Source: Int J Mol Sci. 2021 Jul 24;22(15):7909. doi: 10.3390/ijms22157909 (PMC8348756; doi:10.3390/ijms22157909)
Supplement: Supplementary file 1 [file ijms-22-07909-s001.zip]

Archive with 4 entries (4 files):
- ijms-1280996 suppl figures.pdf
- Table S2 Differentially Expressed Genes between the WT and the vpb1 Mutant Detected Using RNA-seq.xls
- Table S3 Binding region analysis of the promoter of target genes regulated by VPB1.xls
- Table S4 Primers used in this study.xls
