# Supplementary material for: VPB1 Encoding BELL-like Homeodomain Protein Is Involved in Rice Panicle Architecture
Source: Int J Mol Sci. 2021 Jul 24;22(15):7909. doi: 10.3390/ijms22157909 (PMC8348756; doi:10.3390/ijms22157909)
Supplement: Supplementary file 1 [file ijms-22-07909-s001.zip › Table S2 Differentially Expressed Genes between the WT and the vpb1 Mutant Detected Using RNA-seq.xls]

## Sheet: DOWN
Gene ID	Gene Symbol	Type	log2 (T1 / C1)	Qvalue ( (T1 / C1))	KEGG Pathway Desc	KEGG Disease Desc	KEGG Module Desc	KEGG Reaction Desc	GO_C Desc	GO_F Desc	GO_P Desc	msu_geneid
4350329	LOC4350329	mRNA	-0.306875	0.0352992	03440///Homologous recombination		M00729///Fluoroquinolone resistance, gyrase-protecting protein Qnr		GO:0005739///mitochondrion	GO:0003690///double-stranded DNA binding+++GO:0008094///DNA-dependent ATPase activity+++GO:0003697///single-stranded DNA binding+++GO:0000400///four-way junction DNA binding+++GO:0005524///ATP binding+++GO:0000150///recombinase activity	GO:0006312///mitotic recombination+++GO:0000730///DNA recombinase assembly+++GO:0010212///response to ionizing radiation+++GO:0042148///strand invasion	LOC_Os11g19720
4325375	LOC4325375	mRNA	-0.439649	9.82922e-31	00290///Valine, leucine and isoleucine biosynthesis+++01110///Biosynthesis of secondary metabolites+++01210///2-Oxocarboxylic acid metabolism+++01100///Metabolic pathways+++01130///Biosynthesis of antibiotics+++00770///Pantothenate and CoA biosynthesis+++01230///Biosynthesis of amino acids		M00019///Valine/isoleucine biosynthesis, pyruvate => valine / 2-oxobutanoate => isoleucine+++M00570///Isoleucine biosynthesis, threonine => 2-oxobutanoate => isoleucine	R04439///(R)-2,3-dihydroxy-3-methylbutanoate:NADP+ oxidoreductase (isomerizing) (R)-2,3-Dihydroxy-3-methylbutanoate + NADP+ <=> (S)-2-Acetolactate + NADPH + H++++R05068///(R)-2,3-Dihydroxy-3-methylpentanoate:NADP+ oxidoreductase (isomerizing) (R)-2,3-Dihydroxy-3-methylpentanoate + NADP+ <=> (R)-3-Hydroxy-3-methyl-2-oxopentanoate + NADPH + H++++R04440///(R)-2,3-Dihydroxy-3-methylbutanoate:NADP+ ox…	GO:0009507///chloroplast	GO:0004455///ketol-acid reductoisomerase activity+++GO:0000287///magnesium ion binding+++GO:0070402///NADPH binding+++GO:0042803///protein homodimerization activity	GO:0009097///isoleucine biosynthetic process+++GO:0009099///valine biosynthetic process	LOC_Os01g46380
4330053	LOC4330053	mRNA	-0.774374	0.0112271							GO:0006952///defense response	LOC_Os02g41910
4335713	LOC4335713	mRNA	-0.324145	1.04453e-06	04144///Endocytosis	H00266///Hereditary spastic paraplegia (SPG)+++H01568///3C syndrome			GO:0071203///WASH complex			LOC_Os04g32690
4330570	LOC4330570	mRNA	-0.322778	2.40542e-06	00230///Purine metabolism+++01100///Metabolic pathways+++03020///RNA polymerase+++00240///Pyrimidine metabolism		M00180///RNA polymerase II, eukaryotes	R00443///UTP:RNA uridylyltransferase UTP + RNA <=> Diphosphate + RNA+++R00441///GTP:RNA guanylyltransferase (DNA-directed); GTP:RNA GTP + RNA <=> Diphosphate + RNA+++R00442///CTP:RNA cytidylyltransferase (DNA-directed); CTP:RNA CTP + RNA <=> Diphosphate + RNA+++R00435///ATP:polynucleotide adenylyltransferase; ATP:RNA ATP + RNA <=> Diphosphate + RNA	GO:0030880///RNA polymerase complex	GO:0000166///nucleotide binding+++GO:0003824///catalytic activity	GO:0006352///DNA-templated transcription, initiation	LOC_Os02g49150
4345073	LOC4345073	mRNA	-2.39617	0.017918					GO:0005634///nucleus	GO:0008270///zinc ion binding	GO:0009416///response to light stimulus+++GO:0009909///regulation of flower development	LOC_Os08g15050
107276418	LOC107276418	mRNA	-2.18759	0.00152848	00908///Zeatin biosynthesis			R05708///N6-dimethylallyladenine:(acceptor) oxidoreductase N6-(Delta2-Isopentenyl)-adenine + H2O + Acceptor <=> Adenine + 3-Methyl-2-butenal + Reduced acceptor	GO:0005576///extracellular region+++GO:0005615///extracellular space	GO:0019139///cytokinin dehydrogenase activity+++GO:0003824///catalytic activity+++GO:0071949///FAD binding+++GO:0016491///oxidoreductase activity+++GO:0050660///flavin adenine dinucleotide binding	GO:0055114///oxidation-reduction process+++GO:0009690///cytokinin metabolic process
112936015	LOC112936015	mRNA	-0.344122	0.0365849
4345900	LOC4345900	mRNA	-0.990711	4.53396e-51					GO:0005634///nucleus	GO:0008270///zinc ion binding+++GO:0003677///DNA binding+++GO:0044212///transcription regulatory region DNA binding+++GO:0003700///DNA-binding transcription factor activity	GO:0006351///transcription, DNA-templated+++GO:0006355///regulation of transcription, DNA-templated	LOC_Os08g38220
4331291	LOC4331291	mRNA	-0.392401	3.72914e-11					GO:0016021///integral component of membrane			LOC_Os03g01210
4339355	LOC4339355	mRNA	-0.314755	7.71204e-05		H00768///Nonsyndromic autosomal recessive mental retardation (NS-ARMR)				GO:0046872///metal ion binding		LOC_Os05g44590
4329463	LOC4329463	mRNA	-0.355147	0.000114824	04626///Plant-pathogen interaction				GO:0005886///plasma membrane	GO:0004675///transmembrane receptor protein serine/threonine kinase activity+++GO:0004674///protein serine/threonine kinase activity+++GO:0004672///protein kinase activity+++GO:0005524///ATP binding	GO:0009816///defense response to bacterium, incompatible interaction+++GO:0042742///defense response to bacterium+++GO:0045087///innate immune response+++GO:0046777///protein autophosphorylation+++GO:0006952///defense response+++GO:0007166///cell surface receptor signaling pathway+++GO:0002221///pattern recognition receptor signaling pathway	LOC_Os02g30900
4325802	LOC4325802	mRNA	-1.04392	1.57306e-70								LOC_Os01g04160
4343067	LOC4343067	mRNA	-0.394137	0.0208094					GO:0005739///mitochondrion+++GO:0009507///chloroplast	GO:0046872///metal ion binding+++GO:0070006///metalloaminopeptidase activity	GO:0009737///response to abscisic acid+++GO:0031365///N-terminal protein amino acid modification+++GO:0070084///protein initiator methionine removal	LOC_Os07g25410
4327781	LOC4327781	mRNA	-0.434231	5.91207e-17					GO:0005634///nucleus	GO:0046983///protein dimerization activity	GO:0006355///regulation of transcription, DNA-templated+++GO:0010629///negative regulation of gene expression+++GO:0006351///transcription, DNA-templated	LOC_Os01g13460
4339604	LOC4339604	mRNA	-1.00715	4.21394e-49								LOC_Os05g48760
4345793	LOC4345793	mRNA	-0.740301	9.55033e-05					GO:0005783///endoplasmic reticulum+++GO:0005794///Golgi apparatus+++GO:0016021///integral component of membrane		GO:0009737///response to abscisic acid+++GO:0006950///response to stress	LOC_Os08g36440
4336255	LOC4336255	mRNA	-0.910457	2.18082e-32						GO:0005524///ATP binding+++GO:0004672///protein kinase activity		LOC_Os04g41500
4339251	LOC4339251	mRNA	-1.86125	1.38115e-19					GO:0005634///nucleus		GO:0010439///regulation of glucosinolate biosynthetic process+++GO:0009658///chloroplast organization+++GO:0010438///cellular response to sulfur starvation	LOC_Os05g43040
4341422	LOC4341422	mRNA	-0.726898	4.08891e-07					GO:0043231///intracellular membrane-bounded organelle	GO:0080043///quercetin 3-O-glucosyltransferase activity+++GO:0080044///quercetin 7-O-glucosyltransferase activity	GO:0008152///metabolic process	LOC_Os06g39270
112938772	LOC112938772	mRNA	-0.911713	0.0296424					GO:0009507///chloroplast	GO:0047714///galactolipase activity+++GO:0008970///phospholipase A1 activity+++GO:0004806///triglyceride lipase activity	GO:0016042///lipid catabolic process
4344088	LOC4344088	mRNA	-0.360778	2.03554e-12	03040///Spliceosome		M00355///Spliceosome, 35S U5-snRNP		GO:0071013///catalytic step 2 spliceosome+++GO:0071014///post-mRNA release spliceosomal complex+++GO:0000974///Prp19 complex		GO:0006396///RNA processing+++GO:0000398///mRNA splicing, via spliceosome+++GO:0000349///generation of catalytic spliceosome for first transesterification step	LOC_Os07g44970
107278595	LOC107278595	mRNA	-0.874281	0.00131048
4347626	LOC4347626	mRNA	-0.937742	8.64639e-24					GO:0005829///cytosol+++GO:0005634///nucleus+++GO:0005739///mitochondrion	GO:0051087///chaperone binding	GO:0071629///cytoplasm protein quality control by the ubiquitin-proteasome system	LOC_Os09g35630
4332153	LOC4332153	mRNA	-0.300579	5.20187e-05	01110///Biosynthesis of secondary metabolites+++00909///Sesquiterpenoid and triterpenoid biosynthesis+++00100///Steroid biosynthesis+++01100///Metabolic pathways+++01130///Biosynthesis of antibiotics			R02874///squalene,NADPH-hemoprotein:oxygen oxidoreductase (2,3-epoxidizing) Squalene + Oxygen + [Reduced NADPH---hemoprotein reductase] <=> (S)-2,3-Epoxysqualene + [Oxidized NADPH---hemoprotein reductase] + H2O	GO:0016021///integral component of membrane	GO:0004506///squalene monooxygenase activity+++GO:0050660///flavin adenine dinucleotide binding		LOC_Os03g12910
107277488	LOC107277488	mRNA	-0.425447	0.00585097	04071///Sphingolipid signaling pathway+++04072///Phospholipase D signaling pathway+++00564///Glycerophospholipid metabolism+++01100///Metabolic pathways+++01110///Biosynthesis of secondary metabolites+++04024///cAMP signaling pathway+++04724///Glutamatergic synapse+++04144///Endocytosis+++00565///Ether lipid metabolism+++04928///Parathyroid hormone synthesis, secretion and action+++04912///GnRH s…			R01310///phosphatidylcholine phosphatidohydrolase Phosphatidylcholine + H2O <=> Phosphatidate + Choline+++R02051///phosphatidylethanolamine phosphatidohydrolase Phosphatidylethanolamine + H2O <=> Ethanolamine + Phosphatidate+++R07385///O-1-Alk-1-enyl-2-acyl-sn-glycero-3-phosphoethanolamine + H2O <=> 2-Acyl-1-(1-alkenyl)-sn-glycero-3-phosphate + Ethanolamine	GO:0031410///cytoplasmic vesicle	GO:0070290///N-acylphosphatidylethanolamine-specific phospholipase D activity+++GO:0004630///phospholipase D activity	GO:0008610///lipid biosynthetic process+++GO:0048017///inositol lipid-mediated signaling+++GO:0016042///lipid catabolic process+++GO:0048364///root development+++GO:0006654///phosphatidic acid biosynthetic process	LOC_Os05g29050
4324438	LOC4324438	mRNA	-0.584062	2.02151e-54						GO:0003676///nucleic acid binding	GO:0031047///gene silencing by RNA	LOC_Os01g16870
4327532	LOC4327532	mRNA	-0.718063	0.0482541					GO:0005634///nucleus		GO:0006970///response to osmotic stress+++GO:0009651///response to salt stress+++GO:0009414///response to water deprivation+++GO:0010228///vegetative to reproductive phase transition of meristem+++GO:0009738///abscisic acid-activated signaling pathway+++GO:0009737///response to abscisic acid+++GO:0010029///regulation of seed germination
4341535	LOC4341535	mRNA	-0.352369	4.96932e-05	01230///Biosynthesis of amino acids+++01100///Metabolic pathways+++01110///Biosynthesis of secondary metabolites+++01200///Carbon metabolism+++00030///Pentose phosphate pathway+++01120///Microbial metabolism in diverse environments+++01130///Biosynthesis of antibiotics+++00230///Purine metabolism	H00946///Arts syndrome+++H01209///Deafness, X-linked+++H00264///Charcot-Marie-Tooth disease (CMT)+++H00196///Phosphoribosylpyrophosphate synthetase I superactivity	M00005///PRPP biosynthesis, ribose 5P => PRPP	R01049///ATP:D-ribose-5-phosphate diphosphotransferase ATP + D-Ribose 5-phosphate <=> AMP + 5-Phospho-alpha-D-ribose 1-diphosphate	GO:0009507///chloroplast	GO:0000287///magnesium ion binding+++GO:0016301///kinase activity+++GO:0005524///ATP binding+++GO:0004749///ribose phosphate diphosphokinase activity	GO:0009165///nucleotide biosynthetic process+++GO:0009156///ribonucleoside monophosphate biosynthetic process+++GO:0009116///nucleoside metabolic process	LOC_Os06g41360
4349237	LOC4349237	mRNA	-0.503878	7.20171e-09					GO:0005634///nucleus	GO:0000981///DNA-binding transcription factor activity, RNA polymerase II-specific+++GO:0003700///DNA-binding transcription factor activity+++GO:0003677///DNA binding+++GO:0000977///RNA polymerase II regulatory region sequence-specific DNA binding+++GO:0043565///sequence-specific DNA binding+++GO:0044212///transcription regulatory region DNA binding+++GO:0046983///protein dimerization activity+++…	GO:0006355///regulation of transcription, DNA-templated+++GO:0045944///positive regulation of transcription by RNA polymerase II+++GO:0007275///multicellular organism development	LOC_Os10g39130
4327621	LOC4327621	mRNA	-1.42637	3.14967e-141					GO:0005634///nucleus	GO:0003700///DNA-binding transcription factor activity+++GO:0003677///DNA binding	GO:0006351///transcription, DNA-templated+++GO:0009873///ethylene-activated signaling pathway	LOC_Os01g58420
4326717	LOC4326717	mRNA	-1.27154	4.86977e-69						GO:0046872///metal ion binding+++GO:0004722///protein serine/threonine phosphatase activity		LOC_Os01g19130
4345989	LOC4345989	mRNA	-0.72822	1.70109e-24								LOC_Os08g39740
9272141	LOC9272141	mRNA	-0.450667	1.74001e-10		H00290///Aicardi-Goutieres syndrome (AGS)						LOC_Os01g01920
4349157	LOC4349157	mRNA	-0.500437	1.39685e-07	01110///Biosynthesis of secondary metabolites+++01100///Metabolic pathways+++00400///Phenylalanine, tyrosine and tryptophan biosynthesis+++01130///Biosynthesis of antibiotics+++01230///Biosynthesis of amino acids		M00024///Phenylalanine biosynthesis, chorismate => phenylalanine	R00691///L-arogenate hydro-lyase (decarboxylating; L-phenylalanine-forming) L-Arogenate <=> L-Phenylalanine + H2O + CO2+++R01373///prephenate hydro-lyase (decarboxylating; phenylpyruvate-forming) Prephenate <=> Phenylpyruvate + H2O + CO2		GO:0004664///prephenate dehydratase activity	GO:0009094///L-phenylalanine biosynthetic process	LOC_Os10g37980
4339408	LOC4339408	mRNA	-0.465443	2.32946e-14	01100///Metabolic pathways+++00790///Folate biosynthesis		M00840///Tetrahydrofolate biosynthesis, mediated by ribA and trpF, GTP => THF+++M00126///Tetrahydrofolate biosynthesis, GTP => THF	R03067///(7,8-dihydropterin-6-yl)methyl diphosphate:4-aminobenzoate 2-amino-4-hydroxy-7,8-dihydropteridine-6-methenyltransferase 6-Hydroxymethyl-7,8-dihydropterin diphosphate + 4-Aminobenzoate <=> Diphosphate + Dihydropteroate+++R03066///6-(hydroxymethyl)-7,8-dihydropterin:4-aminobenzoate 2-amino-4-hydroxydihydropteridine-6-methenyltransferase 6-(Hydroxymethyl)-7,8-dihydropterin + 4-Aminobenzoate…				LOC_Os05g45400
4339897	LOC4339897	mRNA	-1.02637	0.00402668						GO:0003824///catalytic activity	GO:0009116///nucleoside metabolic process
4334912	LOC4334912	mRNA	-0.419993	2.24846e-10	01230///Biosynthesis of amino acids+++00220///Arginine biosynthesis+++01130///Biosynthesis of antibiotics+++01110///Biosynthesis of secondary metabolites+++00330///Arginine and proline metabolism+++01100///Metabolic pathways	H01398///Primary hyperammonemic disorders (Urea cycle disorders)+++H00186///Hyperargininemia	M00029///Urea cycle+++M00134///Polyamine biosynthesis, arginine => ornithine => putrescine	R00551///L-Arginine amidinohydrolase L-Arginine + H2O <=> L-Ornithine + Urea	GO:0005739///mitochondrion+++GO:0009507///chloroplast	GO:0016813///hydrolase activity, acting on carbon-nitrogen (but not peptide) bonds, in linear amidines+++GO:0016787///hydrolase activity+++GO:0004053///arginase activity+++GO:0050897///cobalt ion binding+++GO:0046872///metal ion binding+++GO:0008783///agmatinase activity	GO:0006527///arginine catabolic process+++GO:0006525///arginine metabolic process+++GO:0042742///defense response to bacterium+++GO:0000050///urea cycle+++GO:0033389///putrescine biosynthetic process from arginine, using agmatinase	LOC_Os04g01590
4345736	LOC4345736	mRNA	-1.45706	2.75568e-32							GO:0009733///response to auxin	LOC_Os08g35110
4347069	LOC4347069	mRNA	-3.43661	0.00611372					GO:0005634///nucleus	GO:0003700///DNA-binding transcription factor activity+++GO:0043565///sequence-specific DNA binding	GO:0009751///response to salicylic acid+++GO:0010200///response to chitin+++GO:0009620///response to fungus+++GO:0009617///response to bacterium+++GO:0006351///transcription, DNA-templated	LOC_Os09g25060
4332989	LOC4332989	mRNA	-0.731595	1.70095e-05					GO:0005737///cytoplasm	GO:0046914///transition metal ion binding	GO:0030001///metal ion transport+++GO:0046916///cellular transition metal ion homeostasis	LOC_Os03g26650
4331088	LOC4331088	mRNA	-0.854889	0.000509138					GO:0016021///integral component of membrane	GO:0046921///alpha-(1->6)-fucosyltransferase activity	GO:0036071///N-glycan fucosylation+++GO:0006487///protein N-linked glycosylation	LOC_Os02g56500
4326541	LOC4326541	mRNA	-1.51979	9.20235e-24	04075///Plant hormone signal transduction				GO:0005634///nucleus		GO:0009734///auxin-activated signaling pathway+++GO:0006417///regulation of translation+++GO:0006355///regulation of transcription, DNA-templated	LOC_Os01g53880
4338199	LOC4338199	mRNA	-0.471716	1.77802e-22	03010///Ribosome		M00179///Ribosome, archaea+++M00178///Ribosome, bacteria		GO:0005840///ribosome	GO:0003735///structural constituent of ribosome+++GO:0003729///mRNA binding	GO:0006412///translation	LOC_Os05g15370
4332184	LOC4332184	mRNA	-2.79559	5.56079e-25	01110///Biosynthesis of secondary metabolites+++01100///Metabolic pathways+++02024///Quorum sensing+++00410///beta-Alanine metabolism+++04727///GABAergic synapse+++00650///Butanoate metabolism+++00250///Alanine, aspartate and glutamate metabolism+++01120///Microbial metabolism in diverse environments+++00430///Taurine and hypotaurine metabolism	H01097///Spastic quadriplegic cerebral palsy	M00027///GABA (gamma-Aminobutyrate) shunt	R02466///3-sulfino-L-alanine carboxy-lyase 3-Sulfino-L-alanine <=> Hypotaurine + CO2+++R01682///3-Sulfo-L-alanine carboxy-lyase (taurine-forming) L-Cysteate <=> Taurine + CO2+++R00489///L-aspartate 1-carboxy-lyase (beta-alanine-forming) L-Aspartate <=> beta-Alanine + CO2+++R00261///L-glutamate 1-carboxy-lyase (4-aminobutanoate-forming) L-Glutamate <=> 4-Aminobutanoate + CO2	GO:0005829///cytosol	GO:0003824///catalytic activity+++GO:0004351///glutamate decarboxylase activity+++GO:0030170///pyridoxal phosphate binding+++GO:0016829///lyase activity+++GO:0016831///carboxy-lyase activity	GO:0006538///glutamate catabolic process+++GO:0019752///carboxylic acid metabolic process+++GO:0006536///glutamate metabolic process	LOC_Os03g13300
4324540	LOC4324540	mRNA	-1.68205	4.33927e-26					GO:0016021///integral component of membrane	GO:0016757///transferase activity, transferring glycosyl groups		LOC_Os01g31370
4349165	LOC4349165	mRNA	-1.93586	6.75453e-06					GO:0016021///integral component of membrane	GO:0016705///oxidoreductase activity, acting on paired donors, with incorporation or reduction of molecular oxygen+++GO:0004497///monooxygenase activity+++GO:0005506///iron ion binding+++GO:0020037///heme binding		LOC_Os10g38110
4328249	LOC4328249	mRNA	-0.538286	0.0346091					GO:0005634///nucleus	GO:0003677///DNA binding	GO:0006351///transcription, DNA-templated+++GO:0006355///regulation of transcription, DNA-templated	LOC_Os02g04640
4336872	LOC4336872	mRNA	-0.797448	0.0412108					GO:0005634///nucleus	GO:0003677///DNA binding	GO:0006355///regulation of transcription, DNA-templated+++GO:0006351///transcription, DNA-templated
4327931	LOC4327931	mRNA	-0.301927	1.34999e-06	04712///Circadian rhythm - plant				GO:0005634///nucleus		GO:0006351///transcription, DNA-templated+++GO:0009908///flower development+++GO:2000028///regulation of photoperiodism, flowering+++GO:0006355///regulation of transcription, DNA-templated	LOC_Os01g38530
4324066	LOC4324066	mRNA	-0.656419	5.09551e-07	00010///Glycolysis / Gluconeogenesis+++01130///Biosynthesis of antibiotics+++01100///Metabolic pathways+++01110///Biosynthesis of secondary metabolites			R00014///pyruvate:thiamin diphosphate acetaldehydetransferase (decarboxylating) Pyruvate + Thiamin diphosphate <=> 2-(alpha-Hydroxyethyl)thiamine diphosphate + CO2+++R00755///Acetaldehyde + Thiamin diphosphate <=> 2-(alpha-Hydroxyethyl)thiamine diphosphate		GO:0030976///thiamine pyrophosphate binding+++GO:0004737///pyruvate decarboxylase activity+++GO:0000287///magnesium ion binding		LOC_Os01g06660
4331890	LOC4331890	mRNA	-0.43382	0.0144561					GO:0005634///nucleus	GO:0043565///sequence-specific DNA binding+++GO:0003700///DNA-binding transcription factor activity	GO:0006351///transcription, DNA-templated	LOC_Os03g08960
4325592	LOC4325592	mRNA	-0.530075	3.78748e-09								LOC_Os01g56270
4330391	LOC4330391	mRNA	-1.62266	1.35538e-17								LOC_Os02g46690
4338792	LOC4338792	mRNA	-0.917441	2.24393e-49					GO:0005634///nucleus
4337676	LOC4337676	mRNA	-0.319998	7.23788e-10	01100///Metabolic pathways+++00280///Valine, leucine and isoleucine degradation	H00173///Isovaleric acidemia (IVA)+++H01400///Secondary hyperammonemia	M00036///Leucine degradation, leucine => acetoacetate + acetyl-CoA	R04095///3-methylbutanoyl-CoA:electron-transfer flavoprotein 2,3-oxidoreductase 3-Methylbutanoyl-CoA + FAD <=> 3-Methylcrotonyl-CoA + FADH2	GO:0005759///mitochondrial matrix	GO:0008470///isovaleryl-CoA dehydrogenase activity+++GO:0050660///flavin adenine dinucleotide binding+++GO:0005524///ATP binding	GO:0006552///leucine catabolic process	LOC_Os05g03480
4328362	LOC4328362	mRNA	-0.371714	0.0268498					GO:0005634///nucleus+++GO:0016020///membrane	GO:0043565///sequence-specific DNA binding+++GO:0003700///DNA-binding transcription factor activity	GO:0009873///ethylene-activated signaling pathway+++GO:0019760///glucosinolate metabolic process+++GO:0006351///transcription, DNA-templated+++GO:0006952///defense response
4345149	LOC4345149	mRNA	-0.428	1.18049e-08			M00286///GINS complex		GO:0005634///nucleus		GO:0006260///DNA replication	LOC_Os08g17294
4336973	LOC4336973	mRNA	-0.60817	0.0290239								LOC_Os04g52330
4350626	LOC4350626	mRNA	-0.32698	0.0254458
9266571	LOC9266571	mRNA	-1.08685	0.04096								LOC_Os07g35500
4324241	LOC4324241	mRNA	-1.22701	0.0375897					GO:0005634///nucleus	GO:0003677///DNA binding	GO:0006355///regulation of transcription, DNA-templated+++GO:0006351///transcription, DNA-templated	LOC_Os01g50720
4352104	LOC4352104	mRNA	-0.356082	8.40004e-08
4351419	LOC4351419	mRNA	-0.428788	3.32742e-09					GO:0005737///cytoplasm+++GO:0005634///nucleus	GO:0004672///protein kinase activity+++GO:0016301///kinase activity+++GO:0004674///protein serine/threonine kinase activity+++GO:0016740///transferase activity+++GO:0005524///ATP binding+++GO:0000166///nucleotide binding	GO:0006468///protein phosphorylation+++GO:0016310///phosphorylation+++GO:0007165///signal transduction+++GO:0035556///intracellular signal transduction	LOC_Os12g03810
4336574	LOC4336574	mRNA	-0.375096	0.00106064					GO:0005829///cytosol	GO:0016787///hydrolase activity+++GO:0046872///metal ion binding	GO:0009611///response to wounding	LOC_Os04g46280
4349641	LOC4349641	mRNA	-0.57306	4.59297e-07					GO:0043231///intracellular membrane-bounded organelle	GO:0003723///RNA binding+++GO:0004519///endonuclease activity	GO:0009451///RNA modification	LOC_Os11g03200
4351572	LOC4351572	mRNA	-0.340551	9.08644e-06						GO:0046872///metal ion binding		LOC_Os12g06480
4333900	LOC4333900	mRNA	-0.690623	0.014798
4333681	LOC4333681	mRNA	-0.483191	3.65263e-09					GO:0005618///cell wall+++GO:0005576///extracellular region+++GO:0046658///anchored component of plasma membrane	GO:0030247///polysaccharide binding+++GO:0004553///hydrolase activity, hydrolyzing O-glycosyl compounds+++GO:0042973///glucan endo-1,3-beta-D-glucosidase activity	GO:0071555///cell wall organization+++GO:0005975///carbohydrate metabolic process	LOC_Os03g46660
4351605	LOC4351605	mRNA	-0.354359	0.000493285	01100///Metabolic pathways+++00670///One carbon pool by folate			R02301///5-Formyltetrahydrofolate cyclo-ligase (ADP-forming) ATP + Folinic acid + H+ <=> ADP + Orthophosphate + 5,10-Methenyltetrahydrofolate	GO:0009507///chloroplast	GO:0005524///ATP binding	GO:0008298///intracellular mRNA localization
4326118	LOC4326118	mRNA	-0.419176	4.57141e-09								LOC_Os01g02180
4344478	LOC4344478	mRNA	-0.550855	5.82936e-06					GO:0016021///integral component of membrane			LOC_Os08g01880
4341426	LOC4341426	mRNA	-2.17928	2.24005e-13								LOC_Os06g39370
9267778	LOC9267778	mRNA	-1.25035	0.00716489						GO:0016740///transferase activity+++GO:0030170///pyridoxal phosphate binding+++GO:0008483///transaminase activity+++GO:0003824///catalytic activity	GO:0006520///cellular amino acid metabolic process+++GO:0009058///biosynthetic process	LOC_Os02g20360
4349436	LOC4349436	mRNA	-0.641187	2.82855e-19					GO:0005739///mitochondrion+++GO:0005886///plasma membrane+++GO:0009524///phragmoplast+++GO:0005874///microtubule+++GO:0009506///plasmodesma+++GO:0005774///vacuolar membrane+++GO:0005773///vacuole	GO:0005525///GTP binding+++GO:0003924///GTPase activity+++GO:0008017///microtubule binding	GO:0050832///defense response to fungus+++GO:0051301///cell division+++GO:0007049///cell cycle+++GO:0016192///vesicle-mediated transport+++GO:0046686///response to cadmium ion+++GO:0000266///mitochondrial fission	LOC_Os10g41820
4325564	LOC4325564	mRNA	-0.476659	0.0300431	01100///Metabolic pathways+++00100///Steroid biosynthesis+++01110///Biosynthesis of secondary metabolites			R11097///24-epi-campesterol,NADPH:oxygen oxidoreductase (22,23-dehydrogenating) 24-epi-Campesterol + NADPH + H+ + Oxygen <=> Brassicasterol + NADP+ + 2 H2O+++R07489///beta-sitosterol,NADPH:oxygen oxidoreductase (22,23-dehydrogenating) beta-Sitosterol + NADPH + H+ + Oxygen <=> Stigmasterol + NADP+ + 2 H2O	GO:0016021///integral component of membrane	GO:0004497///monooxygenase activity+++GO:0000249///C-22 sterol desaturase activity+++GO:0020037///heme binding+++GO:0005506///iron ion binding	GO:0016126///sterol biosynthetic process	LOC_Os01g11340
9267346	LOC9267346	mRNA	-0.341317	0.0380509
4340305	LOC4340305	mRNA	-0.365111	0.045226					GO:0016021///integral component of membrane	GO:0022857///transmembrane transporter activity	GO:0055062///phosphate ion homeostasis+++GO:0008643///carbohydrate transport	LOC_Os06g08170
4326937	LOC4326937	mRNA	-0.813887	1.2914e-05					GO:0016021///integral component of membrane+++GO:0005886///plasma membrane	GO:0005524///ATP binding+++GO:0004672///protein kinase activity
4339098	LOC4339098	mRNA	-0.480127	1.19676e-10					GO:0005829///cytosol		GO:0009904///chloroplast accumulation movement+++GO:0009903///chloroplast avoidance movement	LOC_Os05g39840
4341285	LOC4341285	mRNA	-0.318788	0.00266797					GO:0005886///plasma membrane+++GO:0016021///integral component of membrane	GO:0015293///symporter activity+++GO:0015172///acidic amino acid transmembrane transporter activity+++GO:0015175///neutral amino acid transmembrane transporter activity	GO:0015810///aspartate transmembrane transport+++GO:0015827///tryptophan transport	LOC_Os06g36180
4331474	LOC4331474	mRNA	-1.7275	1.1843e-157					GO:0005622///intracellular	GO:0005524///ATP binding+++GO:0016301///kinase activity+++GO:0004672///protein kinase activity+++GO:0016740///transferase activity+++GO:0004674///protein serine/threonine kinase activity+++GO:0000166///nucleotide binding	GO:0006468///protein phosphorylation+++GO:0016310///phosphorylation+++GO:0007165///signal transduction	LOC_Os03g03510
4339269	LOC4339269	mRNA	-0.431565	4.72798e-05	01100///Metabolic pathways+++00195///Photosynthesis				GO:0009535///chloroplast thylakoid membrane+++GO:0009523///photosystem II+++GO:0016021///integral component of membrane	GO:0016301///kinase activity+++GO:0005524///ATP binding	GO:0015979///photosynthesis+++GO:0042549///photosystem II stabilization	LOC_Os05g43300
112936450	LOC112936450	mRNA	-1.88745	0.023513					GO:0016020///membrane+++GO:0016021///integral component of membrane		GO:0007165///signal transduction	LOC_Os09g16160
4339966	LOC4339966	mRNA	-0.504155	0.00534838						GO:0016874///ligase activity+++GO:0031624///ubiquitin conjugating enzyme binding+++GO:0004842///ubiquitin-protein transferase activity	GO:0016567///protein ubiquitination	LOC_Os06g03580
4345496	LOC4345496	mRNA	-0.627119	8.5581e-15								LOC_Os08g30730
4328963	LOC4328963	mRNA	-0.387712	0.000232268	04075///Plant hormone signal transduction				GO:0005634///nucleus	GO:0003677///DNA binding+++GO:0003700///DNA-binding transcription factor activity	GO:0006351///transcription, DNA-templated	LOC_Os02g16680
4333690	LOC4333690	mRNA	-0.335135	2.05563e-13						GO:0003723///RNA binding		LOC_Os03g46770
4336897	LOC4336897	mRNA	-0.515446	0.0214331								LOC_Os04g51400
4333976	LOC4333976	mRNA	-1.2821	9.2524e-24	01110///Biosynthesis of secondary metabolites+++00270///Cysteine and methionine metabolism+++01100///Metabolic pathways		M00368///Ethylene biosynthesis, methionine => ethylene	R00179///S-adenosyl-L-methionine methylthioadenosine-lyase (1-aminocyclopropane-1-carboxylate-forming) S-Adenosyl-L-methionine <=> 1-Aminocyclopropane-1-carboxylate + 5'-Methylthioadenosine		GO:0030170///pyridoxal phosphate binding+++GO:0016847///1-aminocyclopropane-1-carboxylate synthase activity	GO:0009693///ethylene biosynthetic process+++GO:0009835///fruit ripening	LOC_Os03g51740
4325022	LOC4325022	mRNA	-0.528356	9.72698e-06	04075///Plant hormone signal transduction				GO:0005634///nucleus	GO:0003677///DNA binding+++GO:0003700///DNA-binding transcription factor activity	GO:0007165///signal transduction+++GO:0006355///regulation of transcription, DNA-templated+++GO:0009736///cytokinin-activated signaling pathway+++GO:0000160///phosphorelay signal transduction system	LOC_Os01g67770
4345707	LOC4345707	mRNA	-0.395153	0.00221759					GO:0016021///integral component of membrane+++GO:0005576///extracellular region+++GO:0005886///plasma membrane	GO:0019199///transmembrane receptor protein kinase activity+++GO:0004674///protein serine/threonine kinase activity+++GO:0005524///ATP binding	GO:0006468///protein phosphorylation	LOC_Os08g34640
9271957	LOC9271957	mRNA	-1.09232	0.00083562					GO:0016021///integral component of membrane
4352457	LOC4352457	mRNA	-0.827258	1.28146e-17						GO:0005516///calmodulin binding	GO:0006950///response to stress	LOC_Os12g36110
4340218	LOC4340218	mRNA	-0.351874	8.72896e-07					GO:0005634///nucleus	GO:0000981///DNA-binding transcription factor activity, RNA polymerase II-specific+++GO:0046983///protein dimerization activity+++GO:0000977///RNA polymerase II regulatory region sequence-specific DNA binding+++GO:0003700///DNA-binding transcription factor activity+++GO:0044212///transcription regulatory region DNA binding+++GO:0043565///sequence-specific DNA binding+++GO:0008134///transcription …	GO:0006355///regulation of transcription, DNA-templated+++GO:0045944///positive regulation of transcription by RNA polymerase II+++GO:0007275///multicellular organism development+++GO:0030154///cell differentiation+++GO:0009908///flower development	LOC_Os06g06750
4347313	LOC4347313	mRNA	-0.338954	2.24704e-05			M00692///Cell cycle - G1/S transition		GO:0005634///nucleus+++GO:0000307///cyclin-dependent protein kinase holoenzyme complex+++GO:0005737///cytoplasm	GO:0004672///protein kinase activity+++GO:0019901///protein kinase binding+++GO:0016538///cyclin-dependent protein serine/threonine kinase regulator activity	GO:0007049///cell cycle+++GO:0006468///protein phosphorylation+++GO:0045787///positive regulation of cell cycle+++GO:0000278///mitotic cell cycle+++GO:0000079///regulation of cyclin-dependent protein serine/threonine kinase activity+++GO:0008284///positive regulation of cell proliferation+++GO:0007088///regulation of mitotic nuclear division+++GO:0051301///cell division
4332583	LOC4332583	mRNA	-0.333731	0.00988287	04914///Progesterone-mediated oocyte maturation+++04111///Cell cycle - yeast+++04120///Ubiquitin mediated proteolysis+++04113///Meiosis - yeast+++04114///Oocyte meiosis+++04110///Cell cycle		M00389///APC/C complex		GO:0005680///anaphase-promoting complex+++GO:0005737///cytoplasm	GO:0097602///cullin family protein binding+++GO:0061630///ubiquitin protein ligase activity+++GO:0046872///metal ion binding	GO:0051301///cell division+++GO:0007049///cell cycle+++GO:0045842///positive regulation of mitotic metaphase/anaphase transition
4334727	LOC4334727	mRNA	-0.339984	3.56245e-09					GO:0005886///plasma membrane	GO:0004675///transmembrane receptor protein serine/threonine kinase activity+++GO:0005524///ATP binding	GO:0007166///cell surface receptor signaling pathway+++GO:0006950///response to stress+++GO:0006468///protein phosphorylation	LOC_Os03g62340
4340278	LOC4340278	mRNA	-0.321677	9.07851e-05	04130///SNARE interactions in vesicular transport				GO:0031902///late endosome membrane+++GO:0005886///plasma membrane+++GO:0005774///vacuolar membrane+++GO:0005773///vacuole+++GO:0031201///SNARE complex+++GO:0016021///integral component of membrane	GO:0000149///SNARE binding+++GO:0005484///SNAP receptor activity	GO:0061025///membrane fusion+++GO:0006887///exocytosis+++GO:0006906///vesicle fusion+++GO:0015031///protein transport+++GO:0009737///response to abscisic acid+++GO:0010118///stomatal movement+++GO:0009651///response to salt stress	LOC_Os06g07780
4332080	LOC4332080	mRNA	-0.400361	1.27007e-05	04612///Antigen processing and presentation+++04530///Tight junction					GO:0005524///ATP binding	GO:0009644///response to high light intensity+++GO:0042542///response to hydrogen peroxide+++GO:0009408///response to heat	LOC_Os03g11910
4331068	LOC4331068	mRNA	-0.338043	3.85825e-07		H01891///Autosomal recessive spinocerebellar ataxias+++H01657///Nephrotic syndrome+++H00999///Coenzyme Q10 deficiency				GO:0003723///RNA binding+++GO:0016787///hydrolase activity+++GO:0005524///ATP binding+++GO:0004672///protein kinase activity+++GO:0030145///manganese ion binding		LOC_Os02g56200
4349502	LOC4349502	mRNA	-0.475321	3.85257e-09	01110///Biosynthesis of secondary metabolites+++00564///Glycerophospholipid metabolism+++01100///Metabolic pathways+++00561///Glycerolipid metabolism		M00089///Triacylglycerol biosynthesis	R09380///acyl-ACP:sn-glycerol-3-phosphate 1-O-acyltransferase Acyl-[acyl-carrier protein] + sn-Glycerol 3-phosphate <=> 1-Acyl-sn-glycerol 3-phosphate + Acyl-carrier protein+++R00851///acyl-CoA:sn-glycerol-3-phosphate 1-O-acyltransferase sn-Glycerol 3-phosphate + Acyl-CoA <=> 1-Acyl-sn-glycerol 3-phosphate + CoA	GO:0009570///chloroplast stroma	GO:0102420///sn-1-glycerol-3-phosphate C16:0-DCA-CoA acyl transferase activity+++GO:0004366///glycerol-3-phosphate O-acyltransferase activity	GO:0016024///CDP-diacylglycerol biosynthetic process	LOC_Os10g42720
4329900	LOC4329900	mRNA	-0.469737	4.0333e-14					GO:0009507///chloroplast	GO:0003690///double-stranded DNA binding+++GO:0003727///single-stranded RNA binding+++GO:0019843///rRNA binding	GO:0006970///response to osmotic stress+++GO:0009658///chloroplast organization+++GO:0006353///DNA-templated transcription, termination+++GO:0009651///response to salt stress+++GO:0008380///RNA splicing+++GO:0006355///regulation of transcription, DNA-templated+++GO:0042255///ribosome assembly+++GO:0032502///developmental process+++GO:0009737///response to abscisic acid
4345573	LOC4345573	mRNA	-0.568768	1.55407e-17	00500///Starch and sucrose metabolism+++01100///Metabolic pathways			R02778///Trehalose-6-phosphate phosphohydrolase alpha,alpha'-Trehalose 6-phosphate + H2O <=> alpha,alpha-Trehalose + Orthophosphate+++R02737///UDPglucose:D-glucose-6-phosphate 1-alpha-D-glucosyltransferase UDP-glucose + alpha-D-Glucose 6-phosphate <=> UDP + alpha,alpha'-Trehalose 6-phosphate	GO:0005737///cytoplasm	GO:0016791///phosphatase activity+++GO:0016757///transferase activity, transferring glycosyl groups	GO:0070413///trehalose metabolism in response to stress+++GO:0005992///trehalose biosynthetic process	LOC_Os08g31980
4345860	LOC4345860	mRNA	-1.8431	1.00188e-08					GO:0016021///integral component of membrane	GO:0009055///electron transfer activity		LOC_Os08g37660
4352551	LOC4352551	mRNA	-0.309431	5.02021e-06					GO:0000178///exosome (RNase complex)	GO:0003723///RNA binding		LOC_Os12g37890
4346962	LOC4346962	mRNA	-0.443045	5.94295e-08	04626///Plant-pathogen interaction					GO:0016787///hydrolase activity	GO:0006629///lipid metabolic process	LOC_Os09g22450
9269795	LOC9269795	mRNA	-1.0309	1.44299e-08					GO:0005634///nucleus	GO:0008270///zinc ion binding		LOC_Os06g44450
4329591	LOC4329591	mRNA	-2.16037	1.18135e-78						GO:0004842///ubiquitin-protein transferase activity		LOC_Os02g33680
4343033	LOC4343033	mRNA	-1.25708	0.049606					GO:0000325///plant-type vacuole+++GO:0009505///plant-type cell wall	GO:0005199///structural constituent of cell wall	GO:0030307///positive regulation of cell growth+++GO:0009413///response to flooding+++GO:0009751///response to salicylic acid+++GO:0009737///response to abscisic acid+++GO:0046622///positive regulation of organ growth	LOC_Os07g23640
4327667	LOC4327667	mRNA	-0.48811	2.38227e-27					GO:0005886///plasma membrane	GO:0005524///ATP binding+++GO:0004675///transmembrane receptor protein serine/threonine kinase activity	GO:0007166///cell surface receptor signaling pathway+++GO:0006952///defense response+++GO:0006468///protein phosphorylation	LOC_Os01g40590
4334988	LOC4334988	mRNA	-0.646901	4.70132e-08						GO:0004252///serine-type endopeptidase activity		LOC_Os04g03810
4334643	LOC4334643	mRNA	-1.26764	8.44077e-37							GO:0009061///anaerobic respiration	LOC_Os03g61150
4332412	LOC4332412	mRNA	-0.660792	3.8756e-14					GO:0005634///nucleus+++GO:0005737///cytoplasm	GO:0004842///ubiquitin-protein transferase activity		LOC_Os03g16824
4334568	LOC4334568	mRNA	-0.608663	0.00875136								LOC_Os03g60220
4343138	LOC4343138	mRNA	-0.480263	3.94516e-13						GO:0003723///RNA binding
4331443	LOC4331443	mRNA	-0.666084	0.0118571						GO:0045486///naringenin 3-dioxygenase activity+++GO:0031418///L-ascorbic acid binding+++GO:0046872///metal ion binding	GO:0009813///flavonoid biosynthetic process	LOC_Os03g03034
9272317	LOC9272317	mRNA	-1.31342	4.78057e-37					GO:0005737///cytoplasm+++GO:0005634///nucleus			LOC_Os03g25760
4333674	LOC4333674	mRNA	-1.15007	2.27637e-07						GO:0043531///ADP binding		LOC_Os03g46550
4324428	LOC4324428	mRNA	-0.448561	5.96513e-12					GO:0005634///nucleus+++GO:0009360///DNA polymerase III complex+++GO:0005886///plasma membrane+++GO:0005663///DNA replication factor C complex	GO:0003887///DNA-directed DNA polymerase activity+++GO:0003677///DNA binding+++GO:0005524///ATP binding	GO:0006261///DNA-dependent DNA replication+++GO:0006281///DNA repair	LOC_Os01g53070
4343724	LOC4343724	mRNA	-0.374774	1.5713e-12								LOC_Os07g39300
4341991	LOC4341991	mRNA	-0.438391	1.03513e-05								LOC_Os06g49050
4330220	LOC4330220	mRNA	-0.303104	0.0112466	04146///Peroxisome	H00205///Peroxisome biogenesis disorder+++H01342///Zellweger syndrome (ZS)			GO:0005778///peroxisomal membrane+++GO:0005829///cytosol	GO:0033328///peroxisome membrane targeting sequence binding	GO:0007031///peroxisome organization+++GO:0006625///protein targeting to peroxisome	LOC_Os02g44220
4349244	LOC4349244	mRNA	-0.318265	0.000525742		H01891///Autosomal recessive spinocerebellar ataxias+++H00058///Amyotrophic lateral sclerosis (ALS)+++H00848///Ataxia with ocular apraxia (AOA)						LOC_Os10g39230
4326858	LOC4326858	mRNA	-0.406688	0.00126871					GO:0005634///nucleus	GO:0003677///DNA binding+++GO:0003700///DNA-binding transcription factor activity		LOC_Os01g47600
4336947	LOC4336947	mRNA	-1.59837	4.75856e-120					GO:0016020///membrane+++GO:0005634///nucleus	GO:0003700///DNA-binding transcription factor activity+++GO:0043565///sequence-specific DNA binding	GO:0006952///defense response+++GO:0006351///transcription, DNA-templated+++GO:0009873///ethylene-activated signaling pathway+++GO:0019760///glucosinolate metabolic process	LOC_Os04g52090
9269675	LOC9269675	mRNA	-2.83974	1.11216e-123	00906///Carotenoid biosynthesis			R07202///abscisate,NADPH:oxygen oxidoreductase (8'-hydroxylating) Abscisate + NADPH + H+ + Oxygen <=> 8'-Hydroxyabscisate + NADP+ + H2O	GO:0016021///integral component of membrane+++GO:0016020///membrane+++GO:0005783///endoplasmic reticulum+++GO:0005789///endoplasmic reticulum membrane	GO:0004497///monooxygenase activity+++GO:0016491///oxidoreductase activity+++GO:0016705///oxidoreductase activity, acting on paired donors, with incorporation or reduction of molecular oxygen+++GO:0005506///iron ion binding+++GO:0046872///metal ion binding+++GO:0020037///heme binding	GO:0009687///abscisic acid metabolic process+++GO:0046345///abscisic acid catabolic process+++GO:0016125///sterol metabolic process+++GO:0055114///oxidation-reduction process
4331809	LOC4331809	mRNA	-0.349028	0.000660878					GO:0016021///integral component of membrane+++GO:0009941///chloroplast envelope	GO:0004842///ubiquitin-protein transferase activity	GO:0006996///organelle organization	LOC_Os03g08000
9268106	LOC9268106	mRNA	-1.02377	0.00154307					GO:0005634///nucleus		GO:0009651///response to salt stress+++GO:0009737///response to abscisic acid+++GO:0009414///response to water deprivation+++GO:0010029///regulation of seed germination+++GO:0006970///response to osmotic stress+++GO:0010228///vegetative to reproductive phase transition of meristem+++GO:0009738///abscisic acid-activated signaling pathway
4335629	LOC4335629	mRNA	-1.36771	2.2297e-07								LOC_Os04g31110
4340720	LOC4340720	mRNA	-0.923628	3.42142e-25					GO:0009705///plant-type vacuole membrane+++GO:0016021///integral component of membrane	GO:0005253///anion channel activity+++GO:0015140///malate transmembrane transporter activity	GO:0015743///malate transport
4344077	LOC4344077	mRNA	-0.889534	1.468e-38					GO:0070449///elongin complex		GO:0006368///transcription elongation from RNA polymerase II promoter	LOC_Os07g44820
4334135	LOC4334135	mRNA	-0.333601	1.43146e-15					GO:0005622///intracellular	GO:0000155///phosphorelay sensor kinase activity+++GO:0042803///protein homodimerization activity+++GO:0009881///photoreceptor activity	GO:0006355///regulation of transcription, DNA-templated+++GO:0006351///transcription, DNA-templated+++GO:0009585///red, far-red light phototransduction+++GO:0018298///protein-chromophore linkage+++GO:0009584///detection of visible light+++GO:0017006///protein-tetrapyrrole linkage	LOC_Os03g54084
9266421	LOC9266421	mRNA	-0.369041	1.0054e-06	01210///2-Oxocarboxylic acid metabolism+++01130///Biosynthesis of antibiotics+++01200///Carbon metabolism+++01100///Metabolic pathways+++00630///Glyoxylate and dicarboxylate metabolism+++01120///Microbial metabolism in diverse environments+++01110///Biosynthesis of secondary metabolites+++00720///Carbon fixation pathways in prokaryotes+++01230///Biosynthesis of amino acids+++00020///Citrate cycle…		M00173///Reductive citrate cycle (Arnon-Buchanan cycle)+++M00009///Citrate cycle (TCA cycle, Krebs cycle)+++M00010///Citrate cycle, first carbon oxidation, oxaloacetate => 2-oxoglutarate+++M00012///Glyoxylate cycle+++M00740///Methylaspartate cycle	R01900///isocitrate hydro-lyase (cis-aconitate-forming) Isocitrate <=> cis-Aconitate + H2O+++R01324///citrate hydroxymutase Citrate <=> Isocitrate+++R01325///citrate hydro-lyase (cis-aconitate-forming) Citrate <=> cis-Aconitate + H2O	GO:0005618///cell wall+++GO:0005829///cytosol+++GO:0005739///mitochondrion+++GO:0005774///vacuolar membrane+++GO:0009570///chloroplast stroma+++GO:0005737///cytoplasm+++GO:0009507///chloroplast	GO:0005507///copper ion binding+++GO:0046872///metal ion binding+++GO:0003994///aconitate hydratase activity+++GO:0005524///ATP binding+++GO:0051539///4 iron, 4 sulfur cluster binding	GO:0006097///glyoxylate cycle+++GO:0006979///response to oxidative stress+++GO:0006099///tricarboxylic acid cycle+++GO:0009737///response to abscisic acid+++GO:1990641///response to iron ion starvation+++GO:0006102///isocitrate metabolic process+++GO:0046686///response to cadmium ion+++GO:0090351///seedling development+++GO:0006101///citrate metabolic process+++GO:0009651///response to salt stress
4332152	LOC4332152	mRNA	-0.458454	4.91309e-12	01110///Biosynthesis of secondary metabolites+++01100///Metabolic pathways+++00909///Sesquiterpenoid and triterpenoid biosynthesis+++01130///Biosynthesis of antibiotics+++00100///Steroid biosynthesis			R02874///squalene,NADPH-hemoprotein:oxygen oxidoreductase (2,3-epoxidizing) Squalene + Oxygen + [Reduced NADPH---hemoprotein reductase] <=> (S)-2,3-Epoxysqualene + [Oxidized NADPH---hemoprotein reductase] + H2O	GO:0016021///integral component of membrane	GO:0050660///flavin adenine dinucleotide binding+++GO:0004506///squalene monooxygenase activity		LOC_Os03g12900
4340970	LOC4340970	mRNA	-0.319574	0.0182151	01130///Biosynthesis of antibiotics+++00270///Cysteine and methionine metabolism+++00130///Ubiquinone and other terpenoid-quinone biosynthesis+++00400///Phenylalanine, tyrosine and tryptophan biosynthesis+++01110///Biosynthesis of secondary metabolites+++00960///Tropane, piperidine and pyridine alkaloid biosynthesis+++01100///Metabolic pathways+++00401///Novobiocin biosynthesis+++00360///Phenylal…	H00165///Tyrosinemia	M00034///Methionine salvage pathway+++M00025///Tyrosine biosynthesis, chorismate => tyrosine	R07396///4-Methylthio-2-oxobutanoic acid + L-Glutamate <=> L-Methionine + 2-Oxoglutarate+++R00694///L-Phenylalanine:2-oxoglutarate aminotransferase L-Phenylalanine + 2-Oxoglutarate <=> Phenylpyruvate + L-Glutamate+++R00734///L-tyrosine:2-oxoglutarate aminotransferase L-Tyrosine + 2-Oxoglutarate <=> 3-(4-Hydroxyphenyl)pyruvate + L-Glutamate	GO:0005829///cytosol	GO:0008483///transaminase activity+++GO:0003824///catalytic activity+++GO:0030170///pyridoxal phosphate binding+++GO:0016740///transferase activity	GO:0006520///cellular amino acid metabolic process+++GO:0009058///biosynthetic process	LOC_Os06g23684
9270781	LOC9270781	mRNA	-2.14198	0.0111215
4332276	LOC4332276	mRNA	-0.966234	1.58914e-11					GO:0005634///nucleus+++GO:0005886///plasma membrane+++GO:0005737///cytoplasm+++GO:0005829///cytosol	GO:0005524///ATP binding+++GO:0004674///protein serine/threonine kinase activity+++GO:0016301///kinase activity	GO:0035556///intracellular signal transduction+++GO:0009734///auxin-activated signaling pathway+++GO:0040008///regulation of growth+++GO:0009926///auxin polar transport+++GO:0048825///cotyledon development	LOC_Os03g14840
4325552	LOC4325552	mRNA	-0.582237	1.30828e-17							GO:0008219///cell death+++GO:0009626///plant-type hypersensitive response+++GO:0006955///immune response+++GO:0010337///regulation of salicylic acid metabolic process	LOC_Os01g54510
4325944	LOC4325944	mRNA	-1.04528	1.04089e-18					GO:0016021///integral component of membrane
112936013	LOC112936013	mRNA	-0.35842	0.000615984	03040///Spliceosome+++03018///RNA degradation		M00397///Lsm 1-7 complex+++M00396///Lsm 2-8 complex+++M00354///Spliceosome, U4/U6.U5 tri-snRNP		GO:0005681///spliceosomal complex+++GO:0005732///small nucleolar ribonucleoprotein complex+++GO:0046540///U4/U6 x U5 tri-snRNP complex+++GO:0005730///nucleolus+++GO:0005688///U6 snRNP+++GO:0000932///P-body	GO:0003723///RNA binding	GO:0000398///mRNA splicing, via spliceosome+++GO:0030490///maturation of SSU-rRNA	LOC_Os04g31950
4338664	LOC4338664	mRNA	-0.502042	0.000363167								LOC_Os05g32180
9269607	LOC9269607	mRNA	-0.373655	0.00142038					GO:0005737///cytoplasm	GO:0005524///ATP binding+++GO:0016879///ligase activity, forming carbon-nitrogen bonds	GO:0008033///tRNA processing
4346470	LOC4346470	mRNA	-0.497748	0.000134506					GO:0005737///cytoplasm+++GO:0005634///nucleus	GO:0016791///phosphatase activity+++GO:0004725///protein tyrosine phosphatase activity	GO:0006952///defense response+++GO:1900150///regulation of defense response to fungus	LOC_Os09g05020
4324465	LOC4324465	mRNA	-0.375835	8.33477e-06	01100///Metabolic pathways+++00240///Pyrimidine metabolism			R00158///ATP:UMP phosphotransferase ATP + UMP <=> ADP + UDP	GO:0005737///cytoplasm	GO:0033862///UMP kinase activity	GO:0006221///pyrimidine nucleotide biosynthetic process	LOC_Os01g73450
4350400	LOC4350400	mRNA	-0.615423	0.000621655					GO:0031969///chloroplast membrane+++GO:0009941///chloroplast envelope+++GO:0016020///membrane+++GO:0016021///integral component of membrane+++GO:0009507///chloroplast+++GO:0009536///plastid		GO:0009648///photoperiodism+++GO:0000302///response to reactive oxygen species+++GO:0048366///leaf development
4337567	LOC4337567	mRNA	-0.330826	2.50384e-06						GO:0017112///Rab guanyl-nucleotide exchange factor activity+++GO:0046872///metal ion binding+++GO:0070300///phosphatidic acid binding+++GO:0035091///phosphatidylinositol binding
9268567	LOC9268567	mRNA	-1.36734	2.55137e-16	03040///Spliceosome	H01481///Myelodysplastic syndrome (MDS)			GO:0089701///U2AF+++GO:0005634///nucleus+++GO:0005681///spliceosomal complex	GO:0030628///pre-mRNA 3'-splice site binding+++GO:0003676///nucleic acid binding+++GO:0003677///DNA binding+++GO:0003723///RNA binding+++GO:0046872///metal ion binding	GO:0000398///mRNA splicing, via spliceosome+++GO:0006397///mRNA processing+++GO:0008380///RNA splicing	LOC_Os09g31482
4332388	LOC4332388	mRNA	-0.31428	0.0116204					GO:0009507///chloroplast	GO:0016987///sigma factor activity+++GO:0003677///DNA binding+++GO:0003700///DNA-binding transcription factor activity	GO:0006352///DNA-templated transcription, initiation	LOC_Os03g16430
4339079	LOC4339079	mRNA	-0.419316	3.61399e-09	03013///RNA transport+++03008///Ribosome biogenesis in eukaryotes				GO:0030677///ribonuclease P complex	GO:0004540///ribonuclease activity+++GO:0003723///RNA binding	GO:0008033///tRNA processing+++GO:0006364///rRNA processing	LOC_Os05g39530
4339173	LOC4339173	mRNA	-0.932535	1.83339e-85	04922///Glucagon signaling pathway+++04371///Apelin signaling pathway+++04068///FoxO signaling pathway+++04213///Longevity regulating pathway - multiple species+++04152///AMPK signaling pathway+++04714///Thermogenesis+++04211///Longevity regulating pathway+++04910///Insulin signaling pathway+++04530///Tight junction+++04920///Adipocytokine signaling pathway+++04921///Oxytocin signaling pathway+++…					GO:0005524///ATP binding	GO:0006633///fatty acid biosynthetic process+++GO:0005975///carbohydrate metabolic process+++GO:0042128///nitrate assimilation	LOC_Os05g41220
9269152	LOC9269152	mRNA	-1.75116	4.2164e-12					GO:0000139///Golgi membrane+++GO:0016020///membrane+++GO:0005886///plasma membrane+++GO:0005794///Golgi apparatus+++GO:0005802///trans-Golgi network+++GO:0016021///integral component of membrane	GO:0016757///transferase activity, transferring glycosyl groups+++GO:0016740///transferase activity+++GO:0016759///cellulose synthase activity+++GO:0016760///cellulose synthase (UDP-forming) activity	GO:0030244///cellulose biosynthetic process+++GO:0009833///plant-type primary cell wall biogenesis+++GO:0071555///cell wall organization
4331617	LOC4331617	mRNA	-0.47354	1.45026e-30					GO:0005886///plasma membrane+++GO:0016021///integral component of membrane		GO:0055085///transmembrane transport	LOC_Os03g05390
9270188	LOC9270188	mRNA	-0.352329	3.96581e-06					GO:0019005///SCF ubiquitin ligase complex+++GO:0005634///nucleus+++GO:0005737///cytoplasm	GO:0031625///ubiquitin protein ligase binding	GO:0030162///regulation of proteolysis+++GO:0043161///proteasome-mediated ubiquitin-dependent protein catabolic process	LOC_Os04g52830
4324254	LOC4324254	mRNA	-1.98369	8.99481e-113					GO:0005634///nucleus			LOC_Os01g50910
4325129	LOC4325129	mRNA	-0.970471	2.50665e-08	01100///Metabolic pathways+++00940///Phenylpropanoid biosynthesis+++01110///Biosynthesis of secondary metabolites			R04007///Donor:hydrogen-peroxide oxidoreductase 4-Coumaryl alcohol <=> p-Hydroxyphenyl lignin+++R02596///Donor:hydrogen-peroxide oxidoreductase Coniferyl alcohol <=> Guaiacyl lignin+++R00602///methanol:hydrogen-peroxide oxidoreductase Methanol + Hydrogen peroxide <=> Formaldehyde + 2 H2O+++R07443///donor:hydrogen-peroxide oxidoreductase 5-Hydroxyconiferyl alcohol <=> 5-Hydroxy-guaiacyl lignin+++R…	GO:0005576///extracellular region	GO:0046872///metal ion binding+++GO:0004601///peroxidase activity+++GO:0020037///heme binding	GO:0009809///lignin biosynthetic process+++GO:0006979///response to oxidative stress+++GO:0042744///hydrogen peroxide catabolic process	LOC_Os01g15830
4342407	LOC4342407	mRNA	-0.512804	8.52305e-14					GO:0031969///chloroplast membrane+++GO:0016021///integral component of membrane		GO:0006811///ion transport	LOC_Os07g05570
107278220	LOC107278220	mRNA	-1.9266	0.000327646					GO:0005634///nucleus	GO:0030674///protein binding, bridging+++GO:0008270///zinc ion binding	GO:0007623///circadian rhythm+++GO:0009909///regulation of flower development
4349533	LOC4349533	mRNA	-0.424124	1.61521e-15					GO:0005886///plasma membrane+++GO:0030981///cortical microtubule cytoskeleton+++GO:0005737///cytoplasm		GO:0000913///preprophase band assembly+++GO:0000226///microtubule cytoskeleton organization+++GO:0030865///cortical cytoskeleton organization	LOC_Os11g01170
4343938	LOC4343938	mRNA	-0.411267	0.000694474								LOC_Os07g42890
4324001	LOC4324001	mRNA	-1.04283	1.68863e-05					GO:0005618///cell wall+++GO:0005576///extracellular region+++GO:0048046///apoplast	GO:0004564///beta-fructofuranosidase activity+++GO:0004553///hydrolase activity, hydrolyzing O-glycosyl compounds+++GO:0016798///hydrolase activity, acting on glycosyl bonds+++GO:0016787///hydrolase activity	GO:0008152///metabolic process+++GO:0005975///carbohydrate metabolic process	LOC_Os01g73580
4332233	LOC4332233	mRNA	-1.75301	2.23843e-199								LOC_Os03g14140
4329921	LOC4329921	mRNA	-0.46842	7.48356e-08								LOC_Os02g39340
4337067	LOC4337067	mRNA	-0.601988	3.69898e-06								LOC_Os04g53470
4325600	LOC4325600	mRNA	-0.848022	2.53896e-98					GO:0016021///integral component of membrane+++GO:0005886///plasma membrane+++GO:0005622///intracellular+++GO:0016020///membrane+++GO:0043680///filiform apparatus+++GO:0009506///plasmodesma	GO:0016301///kinase activity+++GO:0004674///protein serine/threonine kinase activity+++GO:0004672///protein kinase activity+++GO:0005524///ATP binding	GO:0016310///phosphorylation+++GO:0006468///protein phosphorylation	LOC_Os01g56330
4325516	LOC4325516	mRNA	-0.772832	6.10287e-05					GO:0005634///nucleus	GO:0003677///DNA binding	GO:0006355///regulation of transcription, DNA-templated	LOC_Os01g48446
4337782	LOC4337782	mRNA	-0.450446	2.28048e-11								LOC_Os05g05210
4324624	LOC4324624	mRNA	-2.15227	5.72269e-64					GO:0005634///nucleus	GO:0043565///sequence-specific DNA binding+++GO:0003700///DNA-binding transcription factor activity	GO:0006351///transcription, DNA-templated	LOC_Os01g54600
4336045	LOC4336045	mRNA	-0.466313	4.45836e-09								LOC_Os04g38610
4332852	LOC4332852	mRNA	-0.392037	1.2722e-19	03008///Ribosome biogenesis in eukaryotes				GO:0005730///nucleolus+++GO:0005634///nucleus	GO:0000166///nucleotide binding+++GO:0005525///GTP binding+++GO:0016787///hydrolase activity	GO:0042254///ribosome biogenesis	LOC_Os03g22890
4336066	LOC4336066	mRNA	-0.484348	1.36514e-35	04722///Neurotrophin signaling pathway+++04110///Cell cycle+++04391///Hippo signaling pathway - fly+++04390///Hippo signaling pathway+++04011///MAPK signaling pathway - yeast+++04151///PI3K-Akt signaling pathway+++04114///Oocyte meiosis	H00268///Lissencephaly (LIS)			GO:0005634///nucleus+++GO:0005737///cytoplasm	GO:0019904///protein domain specific binding		LOC_Os04g38870
4336225	LOC4336225	mRNA	-0.429989	5.39784e-13	04110///Cell cycle+++04111///Cell cycle - yeast	H00631///Cornelia de Lange syndrome (CdLS)			GO:0000798///nuclear cohesin complex	GO:0003682///chromatin binding	GO:0007062///sister chromatid cohesion+++GO:0006302///double-strand break repair	LOC_Os04g41110
107275700	LOC107275700	mRNA	-1.27962	3.36289e-22								LOC_Os05g38270
4336502	LOC4336502	mRNA	-0.774488	3.50666e-24					GO:0005886///plasma membrane	GO:0048032///galacturonate binding	GO:0007267///cell-cell signaling	LOC_Os04g45070
4327512	LOC4327512	mRNA	-1.05428	1.08323e-16					GO:0005634///nucleus	GO:0003677///DNA binding+++GO:0003700///DNA-binding transcription factor activity	GO:0006351///transcription, DNA-templated+++GO:0000160///phosphorelay signal transduction system+++GO:0009736///cytokinin-activated signaling pathway	LOC_Os01g62660
4345404	LOC4345404	mRNA	-0.439187	7.47327e-09								LOC_Os08g28214
4341467	LOC4341467	mRNA	-1.21092	5.73477e-25	04071///Sphingolipid signaling pathway+++01100///Metabolic pathways+++04072///Phospholipase D signaling pathway+++00564///Glycerophospholipid metabolism+++04724///Glutamatergic synapse+++04024///cAMP signaling pathway+++04014///Ras signaling pathway+++04928///Parathyroid hormone synthesis, secretion and action+++04144///Endocytosis+++00565///Ether lipid metabolism+++01110///Biosynthesis of second…			R07385///O-1-Alk-1-enyl-2-acyl-sn-glycero-3-phosphoethanolamine + H2O <=> 2-Acyl-1-(1-alkenyl)-sn-glycero-3-phosphate + Ethanolamine+++R01310///phosphatidylcholine phosphatidohydrolase Phosphatidylcholine + H2O <=> Phosphatidate + Choline+++R02051///phosphatidylethanolamine phosphatidohydrolase Phosphatidylethanolamine + H2O <=> Ethanolamine + Phosphatidate	GO:0016020///membrane	GO:0005509///calcium ion binding+++GO:0070290///N-acylphosphatidylethanolamine-specific phospholipase D activity+++GO:0004630///phospholipase D activity	GO:0046470///phosphatidylcholine metabolic process+++GO:0016042///lipid catabolic process	LOC_Os06g40170
4325078	LOC4325078	mRNA	-0.424558	6.0484e-08	04075///Plant hormone signal transduction				GO:0005634///nucleus	GO:0043565///sequence-specific DNA binding+++GO:0003700///DNA-binding transcription factor activity	GO:0006351///transcription, DNA-templated+++GO:0009789///positive regulation of abscisic acid-activated signaling pathway+++GO:1902584///positive regulation of response to water deprivation+++GO:0009738///abscisic acid-activated signaling pathway+++GO:1901002///positive regulation of response to salt stress+++GO:0045893///positive regulation of transcription, DNA-templated	LOC_Os01g64730
4349274	LOC4349274	mRNA	-1.83467	0.0120825					GO:0016021///integral component of membrane+++GO:0009535///chloroplast thylakoid membrane	GO:0061630///ubiquitin protein ligase activity+++GO:0046872///metal ion binding	GO:0043161///proteasome-mediated ubiquitin-dependent protein catabolic process
4347256	LOC4347256	mRNA	-0.343458	1.22369e-08								LOC_Os09g28300
4331772	LOC4331772	mRNA	-0.50956	4.8551e-10					GO:0005634///nucleus+++GO:0005886///plasma membrane+++GO:0005737///cytoplasm	GO:0005524///ATP binding+++GO:0004675///transmembrane receptor protein serine/threonine kinase activity	GO:0007166///cell surface receptor signaling pathway+++GO:0006952///defense response+++GO:0006468///protein phosphorylation	LOC_Os03g07430
4338114	LOC4338114	mRNA	-0.450313	0.00218812								LOC_Os05g12474
9266462	LOC9266462	mRNA	-0.429995	0.00265024
9266683	LOC9266683	mRNA	-0.356443	1.80298e-05								LOC_Os02g10440
4327408	LOC4327408	mRNA	-1.14859	0.0320979							GO:0030163///protein catabolic process
4330268	LOC4330268	mRNA	-0.68076	8.58997e-08
4337316	LOC4337316	mRNA	-0.328553	9.56219e-07	04112///Cell cycle - Caulobacter				GO:0009507///chloroplast+++GO:0009570///chloroplast stroma+++GO:0005874///microtubule+++GO:0009535///chloroplast thylakoid membrane	GO:0042802///identical protein binding+++GO:0043621///protein self-association+++GO:0005525///GTP binding+++GO:0003924///GTPase activity	GO:0009637///response to blue light+++GO:0010020///chloroplast fission+++GO:0009658///chloroplast organization+++GO:0009902///chloroplast relocation+++GO:0007017///microtubule-based process+++GO:0043572///plastid fission+++GO:0007049///cell cycle	LOC_Os04g56970
4345614	LOC4345614	mRNA	-0.400649	7.8235e-07								LOC_Os08g32980
4339979	LOC4339979	mRNA	-0.502251	2.34996e-06					GO:0016020///membrane+++GO:0005887///integral component of plasma membrane	GO:0035673///oligopeptide transmembrane transporter activity	GO:0015031///protein transport	LOC_Os06g03700
4345795	LOC4345795	mRNA	-1.57849	0.0013253	00910///Nitrogen metabolism+++01120///Microbial metabolism in diverse environments		M00531///Assimilatory nitrate reduction, nitrate => ammonia	R00794///nitrite:NAD+ oxidoreductase; NADH:nitrate Nitrite + NAD+ + H2O <=> Nitrate + NADH + H++++R00796///nitrite:NADP+ oxidoreductase; NADPH:nitrate Nitrite + NADP+ + H2O <=> Nitrate + NADPH + H+	GO:0005829///cytosol	GO:0020037///heme binding+++GO:0050464///nitrate reductase (NADPH) activity+++GO:0030151///molybdenum ion binding+++GO:0009703///nitrate reductase (NADH) activity+++GO:0046872///metal ion binding+++GO:0071949///FAD binding+++GO:0016491///oxidoreductase activity+++GO:0043546///molybdopterin cofactor binding	GO:0042128///nitrate assimilation+++GO:0006809///nitric oxide biosynthetic process+++GO:0055114///oxidation-reduction process	LOC_Os08g36480
4335664	LOC4335664	mRNA	-0.326564	1.79532e-07					GO:0005634///nucleus	GO:0043565///sequence-specific DNA binding+++GO:0001077///proximal promoter DNA-binding transcription activator activity, RNA polymerase II-specific	GO:0045944///positive regulation of transcription by RNA polymerase II	LOC_Os04g31900
4339434	LOC4339434	mRNA	-0.602785	2.43379e-13					GO:0005737///cytoplasm	GO:0046914///transition metal ion binding	GO:0046916///cellular transition metal ion homeostasis+++GO:0030001///metal ion transport	LOC_Os05g45830
4333383	LOC4333383	mRNA	-0.59186	0.000364389					GO:0009506///plasmodesma			LOC_Os03g40100
4342286	LOC4342286	mRNA	-1.02101	1.32484e-12	00400///Phenylalanine, tyrosine and tryptophan biosynthesis+++00401///Novobiocin biosynthesis+++01130///Biosynthesis of antibiotics+++01230///Biosynthesis of amino acids+++01100///Metabolic pathways+++00350///Tyrosine metabolism+++01110///Biosynthesis of secondary metabolites+++00360///Phenylalanine metabolism+++00340///Histidine metabolism+++00960///Tropane, piperidine and pyridine alkaloid bios…		M00026///Histidine biosynthesis, PRPP => histidine	R00734///L-tyrosine:2-oxoglutarate aminotransferase L-Tyrosine + 2-Oxoglutarate <=> 3-(4-Hydroxyphenyl)pyruvate + L-Glutamate+++R03243///5-Amino-2-oxopentanoate:2-oxoglutarate aminotransferase L-Histidinol phosphate + 2-Oxoglutarate <=> 3-(Imidazol-4-yl)-2-oxopropyl phosphate + L-Glutamate+++R00694///L-Phenylalanine:2-oxoglutarate aminotransferase L-Phenylalanine + 2-Oxoglutarate <=> Phenylpyruva…
4336904	LOC4336904	mRNA	-2.5024	2.93663e-59					GO:0005794///Golgi apparatus+++GO:0005618///cell wall+++GO:0048046///apoplast+++GO:0009505///plant-type cell wall+++GO:0005886///plasma membrane+++GO:0005737///cytoplasm	GO:0004553///hydrolase activity, hydrolyzing O-glycosyl compounds+++GO:0016762///xyloglucan:xyloglucosyl transferase activity	GO:0042546///cell wall biogenesis+++GO:0071669///plant-type cell wall organization or biogenesis+++GO:0010411///xyloglucan metabolic process+++GO:0009828///plant-type cell wall loosening	LOC_Os04g51460
4340090	LOC4340090	mRNA	-0.776548	1.92219e-43	00900///Terpenoid backbone biosynthesis+++01130///Biosynthesis of antibiotics+++01100///Metabolic pathways+++00730///Thiamine metabolism+++01110///Biosynthesis of secondary metabolites		M00096///C5 isoprenoid biosynthesis, non-mevalonate pathway	R05636///1-Deoxy-D-xylulose-5-phosphate pyruvate-lyase (carboxylating) Pyruvate + D-Glyceraldehyde 3-phosphate <=> 1-Deoxy-D-xylulose 5-phosphate + CO2	GO:0009507///chloroplast	GO:0008661///1-deoxy-D-xylulose-5-phosphate synthase activity+++GO:0046872///metal ion binding	GO:0052865///1-deoxy-D-xylulose 5-phosphate biosynthetic process+++GO:0016114///terpenoid biosynthetic process+++GO:0009228///thiamine biosynthetic process	LOC_Os06g05100
9270595	LOC9270595	mRNA	-0.487473	0.00015828					GO:0005829///cytosol	GO:0005524///ATP binding+++GO:0004712///protein serine/threonine/tyrosine kinase activity+++GO:0004674///protein serine/threonine kinase activity	GO:0035556///intracellular signal transduction+++GO:0009658///chloroplast organization	LOC_Os04g59000
4326830	LOC4326830	mRNA	-1.65794	1.37097e-27					GO:0016021///integral component of membrane+++GO:0032586///protein storage vacuole membrane+++GO:0005789///endoplasmic reticulum membrane+++GO:0005886///plasma membrane			LOC_Os01g70790
4349880	LOC4349880	mRNA	-0.443597	3.08419e-13	03008///Ribosome biogenesis in eukaryotes+++03013///RNA transport					GO:0003676///nucleic acid binding		LOC_Os11g06760
4337066	LOC4337066	mRNA	-0.458214	0.00037835								LOC_Os04g53460
4329803	LOC4329803	mRNA	-1.77371	0.0144325					GO:0005737///cytoplasm	GO:0043531///ADP binding+++GO:0005524///ATP binding	GO:0009626///plant-type hypersensitive response+++GO:0009870///defense response signaling pathway, resistance gene-dependent+++GO:0042742///defense response to bacterium
4340939	LOC4340939	mRNA	-0.512632	1.98923e-14	04075///Plant hormone signal transduction				GO:0005634///nucleus		GO:0009734///auxin-activated signaling pathway+++GO:0006355///regulation of transcription, DNA-templated	LOC_Os06g22870
4347179	LOC4347179	mRNA	-1.79837	1.80096e-05					GO:0005886///plasma membrane	GO:0005524///ATP binding+++GO:0004675///transmembrane receptor protein serine/threonine kinase activity	GO:0006468///protein phosphorylation+++GO:0006952///defense response+++GO:0007166///cell surface receptor signaling pathway	LOC_Os09g27010
4348088	LOC4348088	mRNA	-0.532744	1.22245e-11								LOC_Os10g05230
4334408	LOC4334408	mRNA	-0.374112	2.5893e-14	04016///MAPK signaling pathway - plant				GO:0005829///cytosol+++GO:0000932///P-body+++GO:0005844///polysome+++GO:0010494///cytoplasmic stress granule+++GO:0005634///nucleus	GO:0003729///mRNA binding+++GO:0003676///nucleic acid binding+++GO:0008270///zinc ion binding+++GO:0004534///5'-3' exoribonuclease activity	GO:0000967///rRNA 5'-end processing+++GO:0009826///unidimensional cell growth+++GO:0010286///heat acclimation+++GO:0006402///mRNA catabolic process+++GO:0031087///deadenylation-independent decapping of nuclear-transcribed mRNA+++GO:0071035///nuclear polyadenylation-dependent rRNA catabolic process+++GO:0070370///cellular heat acclimation+++GO:0010587///miRNA catabolic process+++GO:0006397///mRNA …	LOC_Os03g58060
4349956	LOC4349956	mRNA	-0.423841	1.10672e-06						GO:0004190///aspartic-type endopeptidase activity	GO:0006508///proteolysis+++GO:0030163///protein catabolic process	LOC_Os11g08100
4333845	LOC4333845	mRNA	-0.540635	1.48843e-15	04016///MAPK signaling pathway - plant+++04626///Plant-pathogen interaction				GO:0005737///cytoplasm+++GO:0005768///endosome+++GO:0005634///nucleus+++GO:0005886///plasma membrane	GO:0003677///DNA binding+++GO:0004709///MAP kinase kinase kinase activity+++GO:0005524///ATP binding+++GO:0004674///protein serine/threonine kinase activity+++GO:0019900///kinase binding	GO:0010449///root meristem growth+++GO:0009631///cold acclimation+++GO:0006970///response to osmotic stress+++GO:0009409///response to cold+++GO:0046777///protein autophosphorylation+++GO:0009611///response to wounding+++GO:0000165///MAPK cascade+++GO:0022622///root system development+++GO:0009651///response to salt stress+++GO:0045087///innate immune response+++GO:0023014///signal transduction b…	LOC_Os03g49640
4329738	LOC4329738	mRNA	-0.437145	0.000189812	04712///Circadian rhythm - plant				GO:0016605///PML body+++GO:0016604///nuclear body+++GO:0005634///nucleus+++GO:0005737///cytoplasm	GO:0009882///blue light photoreceptor activity	GO:0009785///blue light signaling pathway	LOC_Os02g36380
4330036	LOC4330036	mRNA	-0.794803	9.221e-23	01100///Metabolic pathways+++00360///Phenylalanine metabolism+++00940///Phenylpropanoid biosynthesis+++01110///Biosynthesis of secondary metabolites		M00350///Capsaicin biosynthesis, L-Phenylalanine => Capsaicin+++M00039///Monolignol biosynthesis, phenylalanine/tyrosine => monolignol+++M00137///Flavanone biosynthesis, phenylalanine => naringenin	R00697///L-phenylalanine ammonia-lyase (trans-cinnamate-forming) L-Phenylalanine <=> trans-Cinnamate + Ammonia	GO:0005737///cytoplasm	GO:0045548///phenylalanine ammonia-lyase activity	GO:0006559///L-phenylalanine catabolic process+++GO:0009800///cinnamic acid biosynthetic process	LOC_Os02g41650
4351575	LOC4351575	mRNA	-0.32612	0.000590864	04020///Calcium signaling pathway+++04660///T cell receptor signaling pathway+++04218///Cellular senescence+++04924///Renin secretion+++04380///Osteoclast differentiation+++04922///Glucagon signaling pathway+++04114///Oocyte meiosis+++04010///MAPK signaling pathway+++04625///C-type lectin receptor signaling pathway+++04921///Oxytocin signaling pathway+++04720///Long-term potentiation+++04724///Gl…				GO:0016021///integral component of membrane	GO:0005509///calcium ion binding+++GO:0046872///metal ion binding		LOC_Os12g06510
4334600	LOC4334600	mRNA	-0.944035	1.20582e-25					GO:0005886///plasma membrane+++GO:0016020///membrane	GO:0046872///metal ion binding+++GO:0016787///hydrolase activity+++GO:0004721///phosphoprotein phosphatase activity+++GO:0005515///protein binding+++GO:0003824///catalytic activity+++GO:0004722///protein serine/threonine phosphatase activity	GO:0006470///protein dephosphorylation+++GO:0006952///defense response	LOC_Os03g60650
4336261	LOC4336261	mRNA	-0.861318	1.08636e-19					GO:0005634///nucleus	GO:0003700///DNA-binding transcription factor activity+++GO:0003677///DNA binding+++GO:0046983///protein dimerization activity	GO:0006351///transcription, DNA-templated	LOC_Os04g41570
4339234	LOC4339234	mRNA	-0.325981	2.70053e-06	04075///Plant hormone signal transduction					GO:0016874///ligase activity	GO:0009733///response to auxin+++GO:0009416///response to light stimulus	LOC_Os05g42150
4327243	LOC4327243	mRNA	-0.950181	3.23006e-13					GO:0000139///Golgi membrane+++GO:0016021///integral component of membrane	GO:0016757///transferase activity, transferring glycosyl groups	GO:0006486///protein glycosylation+++GO:0071555///cell wall organization	LOC_Os01g70200
4341445	LOC4341445	mRNA	-0.338615	1.27639e-08	01110///Biosynthesis of secondary metabolites+++00062///Fatty acid elongation		M00415///Fatty acid biosynthesis, elongation, endoplasmic reticulum	R09419///acyl-CoA:malonyl-CoA C-acyltransferase (decarboxylating) Malonyl-CoA + Acyl-CoA <=> 3-Oxoacyl-CoA + CoA + CO2+++R10825///very-long-chain acyl-CoA:malonyl-CoA C-acyltransferase (decarboxylating) Very-long-chain acyl-CoA + Malonyl-CoA <=> Very-long-chain 3-oxoacyl-CoA + CO2 + CoA	GO:0016021///integral component of membrane	GO:0102336///3-oxo-arachidoyl-CoA synthase activity+++GO:0102756///very-long-chain 3-ketoacyl-CoA synthase activity+++GO:0102337///3-oxo-cerotoyl-CoA synthase activity+++GO:0102338///3-oxo-lignoceronyl-CoA synthase activity	GO:0009416///response to light stimulus+++GO:0006633///fatty acid biosynthetic process+++GO:0009409///response to cold	LOC_Os06g39750
4337359	LOC4337359	mRNA	-1.19436	3.78703e-34	00330///Arginine and proline metabolism+++00410///beta-Alanine metabolism			R09077///spermidine:oxygen oxidoreductase (3-aminopropanal-forming) Spermidine + Oxygen + H2O <=> Putrescine + 3-Aminopropanal + Hydrogen peroxide+++R09076///spermidine:oxygen oxidoreductase (spermidine-forming) Spermine + Oxygen + H2O <=> Spermidine + 3-Aminopropanal + Hydrogen peroxide	GO:0005777///peroxisome	GO:0052901///spermine:oxygen oxidoreductase (spermidine-forming) activity+++GO:0052904///N1-acetylspermidine:oxygen oxidoreductase (3-acetamidopropanal-forming) activity+++GO:0052903///N1-acetylspermine:oxygen oxidoreductase (3-acetamidopropanal-forming) activity+++GO:0046592///polyamine oxidase activity+++GO:0052902///spermidine:oxygen oxidoreductase (3-aminopropanal-forming) activity	GO:0046208///spermine catabolic process+++GO:0006598///polyamine catabolic process	LOC_Os04g57550
4334593	LOC4334593	mRNA	-4.1838	4.66084e-88					GO:0005739///mitochondrion	GO:0003676///nucleic acid binding		LOC_Os03g60570
4330829	LOC4330829	mRNA	-3.28952	4.34894e-84					GO:0005634///nucleus	GO:0003700///DNA-binding transcription factor activity+++GO:0003677///DNA binding	GO:0006351///transcription, DNA-templated+++GO:0045893///positive regulation of transcription, DNA-templated+++GO:0048510///regulation of timing of transition from vegetative to reproductive phase+++GO:0009873///ethylene-activated signaling pathway	LOC_Os02g52670
9266251	LOC9266251	mRNA	-1.09621	1.48114e-09	01110///Biosynthesis of secondary metabolites+++00904///Diterpenoid biosynthesis			R06337///(gibberellin-1),2-oxoglutarate:oxygen oxidoreductase (2beta-hydroxylating) Gibberellin A9 + 2-Oxoglutarate + Oxygen <=> Gibberellin A51 + Succinate + CO2+++R03809///(gibberellin-1),2-oxoglutarate:oxygen oxidoreductase (2beta-hydroxylating) Gibberellin A20 + 2-Oxoglutarate + Oxygen <=> Gibberellin A29 + Succinate + CO2+++R06338///(gibberellin-1),2-oxoglutarate:oxygen oxidoreductase (2beta…		GO:0046872///metal ion binding+++GO:0045543///gibberellin 2-beta-dioxygenase activity	GO:0009686///gibberellin biosynthetic process+++GO:0009685///gibberellin metabolic process	LOC_Os02g41954
4336489	LOC4336489	mRNA	-0.558922	7.84264e-06	04620///Toll-like receptor signaling pathway+++04624///Toll and Imd signaling pathway+++04010///MAPK signaling pathway+++04064///NF-kappa B signaling pathway+++04722///Neurotrophin signaling pathway+++04621///NOD-like receptor signaling pathway	H00096///Defects of toll-like receptor signaling	M00686///Toll-like receptor signaling		GO:0005886///plasma membrane+++GO:0016021///integral component of membrane	GO:0004674///protein serine/threonine kinase activity+++GO:0005524///ATP binding+++GO:0030246///carbohydrate binding	GO:0009751///response to salicylic acid	LOC_Os04g44900
4349384	LOC4349384	mRNA	-0.392392	0.0139767					GO:0016021///integral component of membrane	GO:0015293///symporter activity	GO:0008643///carbohydrate transport	LOC_Os10g41190
4327841	LOC4327841	mRNA	-0.594344	0.0453715						GO:0043531///ADP binding
4339544	LOC4339544	mRNA	-2.14097	6.67352e-34
4346441	LOC4346441	mRNA	-0.654642	1.96057e-10								LOC_Os09g04160
4351675	LOC4351675	mRNA	-2.02537	6.32559e-38					GO:0016021///integral component of membrane+++GO:0031965///nuclear membrane+++GO:0005886///plasma membrane	GO:0015171///amino acid transmembrane transporter activity+++GO:0015293///symporter activity	GO:0003333///amino acid transmembrane transport+++GO:0015802///basic amino acid transport	LOC_Os12g08090
9271317	LOC9271317	mRNA	-0.795281	0.0324277					GO:0005774///vacuolar membrane+++GO:0005773///vacuole+++GO:0016021///integral component of membrane	GO:0005355///glucose transmembrane transporter activity+++GO:0005351///carbohydrate:proton symporter activity	GO:0046323///glucose import	LOC_Os05g49260
4324136	LOC4324136	mRNA	-0.576037	8.42483e-13	03013///RNA transport				GO:0016021///integral component of membrane	GO:0003743///translation initiation factor activity	GO:0006417///regulation of translation	LOC_Os01g58220
4349385	LOC4349385	mRNA	-0.560296	4.6734e-19					GO:0005634///nucleus	GO:0003677///DNA binding+++GO:0000976///transcription regulatory region sequence-specific DNA binding+++GO:0003700///DNA-binding transcription factor activity+++GO:0046872///metal ion binding	GO:0009646///response to absence of light+++GO:0048527///lateral root development+++GO:2000469///negative regulation of peroxidase activity+++GO:0009753///response to jasmonic acid+++GO:0030307///positive regulation of cell growth+++GO:0009651///response to salt stress+++GO:0000122///negative regulation of transcription by RNA polymerase II+++GO:0009723///response to ethylene+++GO:0009733///respo…	LOC_Os10g41200
4344184	LOC4344184	mRNA	-0.924537	1.59144e-07					GO:0005829///cytosol	GO:0061630///ubiquitin protein ligase activity+++GO:0046872///metal ion binding+++GO:0004842///ubiquitin-protein transferase activity	GO:0009737///response to abscisic acid+++GO:0006511///ubiquitin-dependent protein catabolic process+++GO:0009789///positive regulation of abscisic acid-activated signaling pathway+++GO:0009651///response to salt stress	LOC_Os07g46700
4348261	LOC4348261	mRNA	-1.54611	5.40975e-06
4341056	LOC4341056	mRNA	-0.304635	0.0122639								LOC_Os06g28740
4340083	LOC4340083	mRNA	-0.744252	1.02072e-71					GO:0016021///integral component of membrane+++GO:0016020///membrane		GO:0009877///nodulation	LOC_Os06g04990
4325688	LOC4325688	mRNA	-0.875204	4.79052e-06						GO:0005516///calmodulin binding	GO:0006950///response to stress	LOC_Os01g04280
4330259	LOC4330259	mRNA	-1.56852	2.41361e-37					GO:0005886///plasma membrane+++GO:0016020///membrane+++GO:0016021///integral component of membrane	GO:0008381///mechanosensitive ion channel activity	GO:0006820///anion transport+++GO:0055085///transmembrane transport	LOC_Os02g44770
4332441	LOC4332441	mRNA	-0.818019	2.14503e-10	01100///Metabolic pathways+++00520///Amino sugar and nucleotide sugar metabolism		M00361///Nucleotide sugar biosynthesis, eukaryotes	R01384///UDP-D-glucuronate carboxy-lyase (UDP-D-xylose-forming) UDP-glucuronate <=> UDP-D-xylose + CO2	GO:0016021///integral component of membrane+++GO:0016020///membrane	GO:0048040///UDP-glucuronate decarboxylase activity+++GO:0016829///lyase activity	GO:0042732///D-xylose metabolic process+++GO:0033320///UDP-D-xylose biosynthetic process	LOC_Os03g17230
4342939	LOC4342939	mRNA	-0.353854	0.00129448								LOC_Os07g18720
107277390	LOC107277390	mRNA	-0.806663	0.0033569	04075///Plant hormone signal transduction				GO:0016021///integral component of membrane+++GO:0005886///plasma membrane+++GO:0005622///intracellular	GO:0000155///phosphorelay sensor kinase activity+++GO:0019955///cytokine binding+++GO:0004673///protein histidine kinase activity	GO:0009736///cytokinin-activated signaling pathway+++GO:0006468///protein phosphorylation
4332673	LOC4332673	mRNA	-0.324413	2.31066e-05					GO:0005886///plasma membrane+++GO:0016021///integral component of membrane	GO:0004672///protein kinase activity+++GO:0005524///ATP binding		LOC_Os03g20450
4324361	LOC4324361	mRNA	-0.305365	1.22398e-05					GO:0016020///membrane+++GO:0016021///integral component of membrane			LOC_Os01g68970
4341952	LOC4341952	mRNA	-0.830658	4.40864e-37	04910///Insulin signaling pathway				GO:0000145///exocyst		GO:0015031///protein transport+++GO:0006887///exocytosis	LOC_Os06g48330
4330724	LOC4330724	mRNA	-0.416751	5.97909e-05					GO:0005634///nucleus	GO:0003677///DNA binding+++GO:0003700///DNA-binding transcription factor activity	GO:0006355///regulation of transcription, DNA-templated	LOC_Os02g51300
4341020	LOC4341020	mRNA	-0.352053	0.00016372					GO:0005739///mitochondrion	GO:0003723///RNA binding+++GO:0008270///zinc ion binding+++GO:0004519///endonuclease activity	GO:0009451///RNA modification
4336319	LOC4336319	mRNA	-0.489228	8.75935e-12					GO:0005739///mitochondrion+++GO:0005758///mitochondrial intermembrane space+++GO:0005743///mitochondrial inner membrane	GO:0005509///calcium ion binding	GO:0006816///calcium ion transport+++GO:0051562///negative regulation of mitochondrial calcium ion concentration	LOC_Os04g42430
4331090	LOC4331090	mRNA	-1.35543	0.00341156					GO:0005794///Golgi apparatus+++GO:0005886///plasma membrane+++GO:0005802///trans-Golgi network+++GO:0016021///integral component of membrane+++GO:0016020///membrane	GO:0015114///phosphate ion transmembrane transporter activity+++GO:0000822///inositol hexakisphosphate binding	GO:0006799///polyphosphate biosynthetic process+++GO:0048016///inositol phosphate-mediated signaling+++GO:0006817///phosphate ion transport+++GO:0035435///phosphate ion transmembrane transport+++GO:0016036///cellular response to phosphate starvation	LOC_Os02g56510
4337329	LOC4337329	mRNA	-2.49049	1.20289e-27					GO:0005737///cytoplasm	GO:0046914///transition metal ion binding	GO:0046916///cellular transition metal ion homeostasis+++GO:0030001///metal ion transport	LOC_Os04g57200
4337328	LOC4337328	mRNA	-0.414767	1.07734e-05					GO:0005829///cytosol	GO:0004843///thiol-dependent ubiquitin-specific protease activity	GO:0006511///ubiquitin-dependent protein catabolic process+++GO:0016579///protein deubiquitination	LOC_Os04g57190
4338692	LOC4338692	mRNA	-0.619723	3.7283e-10								LOC_Os05g32660
4333106	LOC4333106	mRNA	-1.02473	3.41495e-42					GO:0009506///plasmodesma			LOC_Os03g29980
4346875	LOC4346875	mRNA	-0.492122	0.00943975					GO:0005576///extracellular region	GO:0005507///copper ion binding+++GO:0008447///L-ascorbate oxidase activity		LOC_Os09g20090
4325046	LOC4325046	mRNA	-0.311705	0.0121838					GO:0005773///vacuole+++GO:0005774///vacuolar membrane	GO:0080043///quercetin 3-O-glucosyltransferase activity+++GO:0102205///cholesterol allpha-glucosyltransferase activity+++GO:0080044///quercetin 7-O-glucosyltransferase activity+++GO:0102202///soladodine glucosyltransferase activity+++GO:0016906///sterol 3-beta-glucosyltransferase activity+++GO:0102203///brassicasterol glucosyltransferase activity	GO:0005975///carbohydrate metabolic process+++GO:0009813///flavonoid biosynthetic process+++GO:0016126///sterol biosynthetic process+++GO:0016125///sterol metabolic process+++GO:0009845///seed germination+++GO:0010214///seed coat development+++GO:0030259///lipid glycosylation	LOC_Os01g64750
107282030	LOC107282030	mRNA	-1.938	9.53776e-38
4342268	LOC4342268	mRNA	-0.632362	0.000882937					GO:0016021///integral component of membrane			LOC_Os07g02790
4331306	LOC4331306	mRNA	-0.353668	1.96831e-09					GO:0005886///plasma membrane+++GO:0009506///plasmodesma+++GO:0005856///cytoskeleton+++GO:0005737///cytoplasm	GO:0003779///actin binding
4339294	LOC4339294	mRNA	-0.575815	5.52221e-07								LOC_Os05g43650
4343013	LOC4343013	mRNA	-0.320259	2.68299e-09	04210///Apoptosis+++03410///Base excision repair+++04212///Longevity regulating pathway - worm+++04217///Necroptosis+++04214///Apoptosis - fly		M00296///BER complex		GO:0005730///nucleolus+++GO:0005634///nucleus	GO:0046872///metal ion binding+++GO:0003677///DNA binding+++GO:0051287///NAD binding+++GO:0008270///zinc ion binding+++GO:1990404///protein ADP-ribosylase activity+++GO:0016740///transferase activity+++GO:0016757///transferase activity, transferring glycosyl groups+++GO:0003950///NAD+ ADP-ribosyltransferase activity	GO:0006302///double-strand break repair+++GO:0009737///response to abscisic acid+++GO:0006471///protein ADP-ribosylation+++GO:0070212///protein poly-ADP-ribosylation+++GO:0006979///response to oxidative stress+++GO:0006281///DNA repair	LOC_Os07g23110
107278246	LOC107278246	mRNA	-1.97844	3.0173e-11					GO:0005634///nucleus	GO:0003700///DNA-binding transcription factor activity+++GO:0003677///DNA binding	GO:0006355///regulation of transcription, DNA-templated
4332993	LOC4332993	mRNA	-0.54369	0.00092996					GO:0016020///membrane+++GO:0031225///anchored component of membrane+++GO:0005773///vacuole+++GO:0032578///aleurone grain membrane	GO:0008233///peptidase activity+++GO:0016787///hydrolase activity+++GO:0008289///lipid binding	GO:0006508///proteolysis	LOC_Os03g26820
4329705	LOC4329705	mRNA	-0.562864	2.14947e-13					GO:0005634///nucleus	GO:0003700///DNA-binding transcription factor activity+++GO:0003677///DNA binding+++GO:0043565///sequence-specific DNA binding	GO:0006355///regulation of transcription, DNA-templated
4352336	LOC4352336	mRNA	-0.363742	3.7204e-06					GO:0016021///integral component of membrane+++GO:0005783///endoplasmic reticulum
4325126	LOC4325126	mRNA	-0.318594	0.000740831					GO:0016021///integral component of membrane			LOC_Os01g15790
4337160	LOC4337160	mRNA	-0.47849	0.00292487					GO:0016021///integral component of membrane+++GO:0009534///chloroplast thylakoid	GO:0004222///metalloendopeptidase activity+++GO:0005524///ATP binding		LOC_Os04g54640
4345494	LOC4345494	mRNA	-0.434639	1.35755e-05					GO:0005622///intracellular	GO:0043531///ADP binding	GO:0035556///intracellular signal transduction	LOC_Os08g30634
4323851	LOC4323851	mRNA	-0.536156	1.4298e-26					GO:0016021///integral component of membrane	GO:0004672///protein kinase activity+++GO:0005524///ATP binding		LOC_Os01g39600
4350453	LOC4350453	mRNA	-1.59475	4.69698e-16					GO:0005829///cytosol		GO:0009414///response to water deprivation+++GO:0009631///cold acclimation+++GO:0009737///response to abscisic acid+++GO:0009415///response to water	LOC_Os11g26780
4341119	LOC4341119	mRNA	-0.539449	4.25566e-11					GO:0005634///nucleus			LOC_Os06g30710
9267725	LOC9267725	mRNA	-0.434736	9.77265e-06						GO:0016787///hydrolase activity	GO:0009056///catabolic process	LOC_Os11g13570
4328515	LOC4328515	mRNA	-1.03548	2.88898e-11	04213///Longevity regulating pathway - multiple species	H00754///3-Methylglutaconic aciduria (MGCA)			GO:0009941///chloroplast envelope+++GO:0009507///chloroplast+++GO:0005737///cytoplasm+++GO:0009570///chloroplast stroma+++GO:0005739///mitochondrion	GO:0005524///ATP binding+++GO:0000166///nucleotide binding	GO:0009408///response to heat+++GO:0019538///protein metabolic process+++GO:0042026///protein refolding	LOC_Os02g08490
4325408	LOC4325408	mRNA	-2.28094	2.49127e-24	04626///Plant-pathogen interaction					GO:0005509///calcium ion binding+++GO:0046872///metal ion binding		LOC_Os01g72530
4324881	LOC4324881	mRNA	-0.404858	2.25736e-10					GO:0016021///integral component of membrane			LOC_Os01g66190
4325902	LOC4325902	mRNA	-0.35695	5.92147e-09								LOC_Os01g48220
4341188	LOC4341188	mRNA	-0.655575	8.79437e-28						GO:0046872///metal ion binding+++GO:0004722///protein serine/threonine phosphatase activity		LOC_Os06g33549
4343198	LOC4343198	mRNA	-0.503343	9.73764e-16	04210///Apoptosis+++04141///Protein processing in endoplasmic reticulum+++04140///Autophagy - animal				GO:0016021///integral component of membrane+++GO:0005789///endoplasmic reticulum membrane	GO:0004540///ribonuclease activity+++GO:0005524///ATP binding+++GO:0004674///protein serine/threonine kinase activity	GO:0006986///response to unfolded protein+++GO:0008380///RNA splicing+++GO:0006351///transcription, DNA-templated+++GO:0006397///mRNA processing+++GO:0006355///regulation of transcription, DNA-templated+++GO:0034976///response to endoplasmic reticulum stress	LOC_Os07g28820
107278777	LOC107278777	mRNA	-0.468049	6.79492e-19						GO:0003677///DNA binding+++GO:0046872///metal ion binding
4347402	LOC4347402	mRNA	-0.321674	4.14552e-22	04151///PI3K-Akt signaling pathway+++04657///IL-17 signaling pathway+++04217///Necroptosis+++04621///NOD-like receptor signaling pathway+++04141///Protein processing in endoplasmic reticulum+++04915///Estrogen signaling pathway+++04914///Progesterone-mediated oocyte maturation+++04626///Plant-pathogen interaction+++04659///Th17 cell differentiation+++04612///Antigen processing and presentation				GO:0005737///cytoplasm+++GO:0005886///plasma membrane+++GO:0048471///perinuclear region of cytoplasm+++GO:0005829///cytosol+++GO:0009986///cell surface+++GO:0032991///protein-containing complex	GO:0051082///unfolded protein binding+++GO:0005524///ATP binding+++GO:0005515///protein binding+++GO:0000166///nucleotide binding	GO:0009408///response to heat+++GO:0006457///protein folding+++GO:0034605///cellular response to heat+++GO:0050821///protein stabilization	LOC_Os09g30412
4336457	LOC4336457	mRNA	-0.870402	0.00468147								LOC_Os04g44510
4332396	LOC4332396	mRNA	-0.3454	0.000384048					GO:0005789///endoplasmic reticulum membrane+++GO:0016021///integral component of membrane+++GO:0043231///intracellular membrane-bounded organelle	GO:0004842///ubiquitin-protein transferase activity+++GO:0061630///ubiquitin protein ligase activity+++GO:0046872///metal ion binding	GO:0043161///proteasome-mediated ubiquitin-dependent protein catabolic process+++GO:0009737///response to abscisic acid+++GO:0000209///protein polyubiquitination+++GO:0006511///ubiquitin-dependent protein catabolic process+++GO:0016567///protein ubiquitination+++GO:0009414///response to water deprivation+++GO:0009651///response to salt stress+++GO:0009789///positive regulation of abscisic acid-ac…	LOC_Os03g16570
9270116	LOC9270116	mRNA	-1.93803	0.00809537						GO:0005509///calcium ion binding
4330469	LOC4330469	mRNA	-0.368083	0.000664665	00053///Ascorbate and aldarate metabolism+++01100///Metabolic pathways			R00095///NADH:monodehydroascorbate oxidoreductase NAD+ + 2 Ascorbate <=> NADH + 2 Monodehydroascorbate + H+	GO:0016020///membrane+++GO:0005777///peroxisome+++GO:0005778///peroxisomal membrane+++GO:0016021///integral component of membrane	GO:0050660///flavin adenine dinucleotide binding+++GO:0016491///oxidoreductase activity+++GO:0016656///monodehydroascorbate reductase (NADH) activity	GO:0055114///oxidation-reduction process	LOC_Os02g47800
4340389	LOC4340389	mRNA	-0.579513	3.58738e-40	03008///Ribosome biogenesis in eukaryotes				GO:0005730///nucleolus+++GO:0016020///membrane	GO:0005525///GTP binding	GO:0042254///ribosome biogenesis	LOC_Os06g09570
4338671	LOC4338671	mRNA	-0.531639	1.92218e-10					GO:0016021///integral component of membrane			LOC_Os05g32320
4350817	LOC4350817	mRNA	-0.433801	0.00654372	01110///Biosynthesis of secondary metabolites+++00062///Fatty acid elongation		M00415///Fatty acid biosynthesis, elongation, endoplasmic reticulum	R10825///very-long-chain acyl-CoA:malonyl-CoA C-acyltransferase (decarboxylating) Very-long-chain acyl-CoA + Malonyl-CoA <=> Very-long-chain 3-oxoacyl-CoA + CO2 + CoA+++R09419///acyl-CoA:malonyl-CoA C-acyltransferase (decarboxylating) Malonyl-CoA + Acyl-CoA <=> 3-Oxoacyl-CoA + CoA + CO2	GO:0016021///integral component of membrane	GO:0102756///very-long-chain 3-ketoacyl-CoA synthase activity+++GO:0102336///3-oxo-arachidoyl-CoA synthase activity+++GO:0102337///3-oxo-cerotoyl-CoA synthase activity+++GO:0009922///fatty acid elongase activity+++GO:0102338///3-oxo-lignoceronyl-CoA synthase activity	GO:0009409///response to cold+++GO:0006633///fatty acid biosynthetic process+++GO:0009416///response to light stimulus	LOC_Os11g37900
4352165	LOC4352165	mRNA	-0.674245	8.01467e-15	03030///DNA replication+++03430///Mismatch repair+++03460///Fanconi anemia pathway+++03420///Nucleotide excision repair+++03440///Homologous recombination		M00288///RPA complex			GO:0003678///DNA helicase activity+++GO:0005524///ATP binding	GO:0006281///DNA repair+++GO:0006310///DNA recombination+++GO:0000723///telomere maintenance
4330543	LOC4330543	mRNA	-0.572241	0.033647						GO:0051087///chaperone binding		LOC_Os02g48780
4342538	LOC4342538	mRNA	-0.496619	2.36766e-31								LOC_Os07g07974
107278085	LOC107278085	mRNA	-0.763089	0.0175866					GO:0005737///cytoplasm		GO:0009860///pollen tube growth+++GO:0040008///regulation of growth
4325019	LOC4325019	mRNA	-0.455373	5.87653e-05								LOC_Os01g67730
4336714	LOC4336714	mRNA	-1.28	6.13018e-44					GO:0005737///cytoplasm+++GO:0005768///endosome+++GO:0005794///Golgi apparatus+++GO:0005802///trans-Golgi network+++GO:0016021///integral component of membrane+++GO:0000139///Golgi membrane	GO:0008757///S-adenosylmethionine-dependent methyltransferase activity	GO:0032259///methylation	LOC_Os04g48230
4339717	LOC4339717	mRNA	-0.335944	5.28671e-12								LOC_Os05g50370
107277281	LOC107277281	mRNA	-0.570313	1.22629e-06						GO:0008270///zinc ion binding		LOC_Os05g50950
4345362	LOC4345362	mRNA	-0.512921	3.44585e-17					GO:0005634///nucleus	GO:0004518///nuclease activity+++GO:0016787///hydrolase activity	GO:0090305///nucleic acid phosphodiester bond hydrolysis	LOC_Os08g26870
4341520	LOC4341520	mRNA	-0.544854	3.0664e-45						GO:0008270///zinc ion binding+++GO:0046872///metal ion binding+++GO:0003677///DNA binding
4339996	LOC4339996	mRNA	-0.385658	0.000892786	01110///Biosynthesis of secondary metabolites+++00500///Starch and sucrose metabolism+++00230///Purine metabolism+++01100///Metabolic pathways+++00051///Fructose and mannose metabolism			R02677///ADPmannose sugarphosphohydrolase ADP-mannose + H2O <=> AMP + D-Mannose 1-phosphate+++R00951///ADP-glucose glucose-1-phosphohydrolase ADP-glucose + H2O <=> AMP + D-Glucose 1-phosphate+++R01885///ADP-ribose + H2O <=> alpha-D-Ribose 1-phosphate + AMP	GO:0009507///chloroplast+++GO:0009570///chloroplast stroma	GO:0080041///ADP-ribose pyrophosphohydrolase activity+++GO:0080042///ADP-glucose pyrophosphohydrolase activity+++GO:0046872///metal ion binding+++GO:0019144///ADP-sugar diphosphatase activity		LOC_Os06g03910
4345187	LOC4345187	mRNA	-2.02436	0.0103868	00945///Stilbenoid, diarylheptanoid and gingerol biosynthesis			R09872///S-adenosyl-L-methionine:trans-resveratrol 3,5-O-dimethyltransferase 2 S-Adenosyl-L-methionine + Resveratrol <=> 2 S-Adenosyl-L-homocysteine + Pterostilbene		GO:0008171///O-methyltransferase activity+++GO:0046983///protein dimerization activity		LOC_Os08g19420
4328444	LOC4328444	mRNA	-0.534779	3.39831e-25	04612///Antigen processing and presentation				GO:0005737///cytoplasm+++GO:0005634///nucleus	GO:0046982///protein heterodimerization activity+++GO:0005515///protein binding	GO:0006355///regulation of transcription, DNA-templated+++GO:0009908///flower development+++GO:0006351///transcription, DNA-templated+++GO:0048579///negative regulation of long-day photoperiodism, flowering	LOC_Os02g07450
4340382	LOC4340382	mRNA	-0.61757	1.41428e-23					GO:0005634///nucleus	GO:0003700///DNA-binding transcription factor activity+++GO:0001046///core promoter sequence-specific DNA binding+++GO:0001228///DNA-binding transcription activator activity, RNA polymerase II-specific+++GO:0046983///protein dimerization activity	GO:0080147///root hair cell development+++GO:0055046///microgametogenesis+++GO:0048235///pollen sperm cell differentiation+++GO:0006355///regulation of transcription, DNA-templated+++GO:0048767///root hair elongation+++GO:0006366///transcription by RNA polymerase II+++GO:0048765///root hair cell differentiation	LOC_Os06g09370
4341347	LOC4341347	mRNA	-0.325129	0.00256474	01100///Metabolic pathways+++01110///Biosynthesis of secondary metabolites+++00904///Diterpenoid biosynthesis			R06293///ent-Kaur-16-ene,[reduced NADPH---hemoprotein reductase]:oxygen oxidoreductase (hydroxylating) Kaur-16-en-18-al + [Reduced NADPH---hemoprotein reductase] + Oxygen <=> Kaur-16-en-18-oic acid + [Oxidized NADPH---hemoprotein reductase] + H2O+++R06292///ent-Kaur-16-ene,[reduced NADPH---hemoprotein reductase]:oxygen oxidoreductase (hydroxylating) Kaur-16-en-18-ol + [Reduced NADPH---hemoprotein…	GO:0005783///endoplasmic reticulum+++GO:0016021///integral component of membrane+++GO:0009707///chloroplast outer membrane+++GO:0016020///membrane	GO:0016705///oxidoreductase activity, acting on paired donors, with incorporation or reduction of molecular oxygen+++GO:0016491///oxidoreductase activity+++GO:0005506///iron ion binding+++GO:0016709///oxidoreductase activity, acting on paired donors, with incorporation or reduction of molecular oxygen, NAD(P)H as one donor, and incorporation of one atom of oxygen+++GO:0020037///heme binding+++GO:…	GO:0009686///gibberellin biosynthetic process+++GO:0055114///oxidation-reduction process+++GO:0010241///ent-kaurene oxidation to kaurenoic acid	LOC_Os06g37364
4340229	LOC4340229	mRNA	-0.777274	2.79408e-06					GO:0005634///nucleus	GO:0046983///protein dimerization activity+++GO:0003677///DNA binding+++GO:0003700///DNA-binding transcription factor activity	GO:0010154///fruit development+++GO:0010114///response to red light+++GO:0007623///circadian rhythm+++GO:0048440///carpel development+++GO:0009409///response to cold+++GO:0010187///negative regulation of seed germination+++GO:0006351///transcription, DNA-templated
4337276	LOC4337276	mRNA	-0.366713	8.05072e-07						GO:0043169///cation binding+++GO:0016787///hydrolase activity+++GO:0003824///catalytic activity+++GO:0004721///phosphoprotein phosphatase activity+++GO:0004722///protein serine/threonine phosphatase activity+++GO:0046872///metal ion binding	GO:0006470///protein dephosphorylation
9269176	LOC9269176	mRNA	-0.32152	0.00827395					GO:0031977///thylakoid lumen+++GO:0009579///thylakoid+++GO:0009543///chloroplast thylakoid lumen+++GO:0005739///mitochondrion	GO:0004175///endopeptidase activity+++GO:0008236///serine-type peptidase activity
4337699	LOC4337699	mRNA	-0.479757	5.48285e-20						GO:0003700///DNA-binding transcription factor activity		LOC_Os05g03860
4334465	LOC4334465	mRNA	-0.309475	1.49531e-06						GO:0046982///protein heterodimerization activity		LOC_Os03g58780
4331432	LOC4331432	mRNA	-0.465849	0.00144533					GO:0005737///cytoplasm	GO:0046914///transition metal ion binding	GO:0030001///metal ion transport+++GO:0046916///cellular transition metal ion homeostasis	LOC_Os03g02860
4345217	LOC4345217	mRNA	-0.312978	6.30482e-08					GO:0012505///endomembrane system+++GO:0009506///plasmodesma+++GO:0005783///endoplasmic reticulum+++GO:0016021///integral component of membrane+++GO:0005886///plasma membrane	GO:0008289///lipid binding+++GO:0046872///metal ion binding	GO:0006869///lipid transport	LOC_Os08g20544
4330276	LOC4330276	mRNA	-0.523802	2.88496e-07								LOC_Os02g45000
4333232	LOC4333232	mRNA	-0.468024	4.53928e-06					GO:0005737///cytoplasm	GO:0003676///nucleic acid binding	GO:0031047///gene silencing by RNA+++GO:0010492///maintenance of shoot apical meristem identity+++GO:0010599///production of lsiRNA involved in RNA interference+++GO:0010050///vegetative phase change+++GO:0016246///RNA interference+++GO:0060145///viral gene silencing in virus induced gene silencing+++GO:0040034///regulation of development, heterochronic+++GO:0010267///production of ta-siRNAs invo…	LOC_Os03g33650
4351717	LOC4351717	mRNA	-2.20372	5.99589e-05					GO:0005886///plasma membrane+++GO:0016021///integral component of membrane	GO:0015186///L-glutamine transmembrane transporter activity+++GO:0015194///L-serine transmembrane transporter activity+++GO:0015193///L-proline transmembrane transporter activity+++GO:0015175///neutral amino acid transmembrane transporter activity+++GO:0015180///L-alanine transmembrane transporter activity+++GO:0015171///amino acid transmembrane transporter activity+++GO:0015172///acidic amino ac…	GO:0043090///amino acid import+++GO:0015810///aspartate transmembrane transport+++GO:0015827///tryptophan transport+++GO:0015808///L-alanine transport+++GO:0009624///response to nematode+++GO:0098712///L-glutamate import across plasma membrane	LOC_Os12g09300
4326411	LOC4326411	mRNA	-0.802372	8.54369e-21							GO:0006511///ubiquitin-dependent protein catabolic process	LOC_Os01g35040
4327902	LOC4327902	mRNA	-0.327719	0.000309169	04070///Phosphatidylinositol signaling system			R08964///ATP:1D-myo-inositol-5-diphosphate-pentakisphosphate phosphotransferase ATP + 5-PP-InsP5 <=> ADP + 1D-myo-Inositol 1,5-bis(diphosphate) 2,3,4,6-tetrakisphosphate+++R05799///ATP:1D-myo-inositol-hexakisphosphate phosphotransferase ATP + Phytic acid <=> ADP + 1-Diphosinositol pentakisphosphate	GO:0005886///plasma membrane+++GO:0005829///cytosol	GO:0005524///ATP binding+++GO:0102092///5-diphosphoinositol pentakisphosphate 3-kinase activity+++GO:0052724///inositol hexakisphosphate 3-kinase activity+++GO:0000828///inositol hexakisphosphate kinase activity+++GO:0033857///diphosphoinositol-pentakisphosphate kinase activity+++GO:0052723///inositol hexakisphosphate 1-kinase activity+++GO:0000832///inositol hexakisphosphate 5-kinase activity+++…	GO:1904966///positive regulation of vitamin E biosynthetic process+++GO:0006020///inositol metabolic process+++GO:0032958///inositol phosphate biosynthetic process+++GO:0009817///defense response to fungus, incompatible interaction+++GO:1900367///positive regulation of defense response to insect+++GO:1905036///positive regulation of antifungal innate immune response+++GO:0009861///jasmonic acid a…	LOC_Os01g56980
4345749	LOC4345749	mRNA	-1.65766	1.83479e-41	04910///Insulin signaling pathway				GO:0000145///exocyst		GO:0015031///protein transport+++GO:0006887///exocytosis	LOC_Os08g35470
4350827	LOC4350827	mRNA	-0.8524	9.92406e-15								LOC_Os11g38010
4340941	LOC4340941	mRNA	-0.711825	2.76797e-35					GO:0005774///vacuolar membrane+++GO:0016020///membrane+++GO:0016021///integral component of membrane+++GO:0005773///vacuole	GO:0015250///water channel activity+++GO:0015267///channel activity	GO:0055085///transmembrane transport+++GO:0006833///water transport	LOC_Os06g22960
4340045	LOC4340045	mRNA	-0.51583	0.000104173					GO:0005634///nucleus	GO:0003680///AT DNA binding+++GO:0003700///DNA-binding transcription factor activity	GO:0006351///transcription, DNA-templated	LOC_Os06g04540
4327150	LOC4327150	mRNA	-0.686709	2.36026e-06	01100///Metabolic pathways+++00195///Photosynthesis				GO:0016021///integral component of membrane+++GO:0009579///thylakoid+++GO:0009523///photosystem II+++GO:0009536///plastid+++GO:0016020///membrane+++GO:0009507///chloroplast+++GO:0009535///chloroplast thylakoid membrane		GO:0042549///photosystem II stabilization+++GO:0015979///photosynthesis
4337069	LOC4337069	mRNA	-0.935429	1.24176e-05					GO:0009543///chloroplast thylakoid lumen+++GO:0031977///thylakoid lumen+++GO:0009535///chloroplast thylakoid membrane+++GO:0009507///chloroplast	GO:0045735///nutrient reservoir activity+++GO:0036094///small molecule binding	GO:0009414///response to water deprivation+++GO:0009408///response to heat+++GO:0010117///photoprotection+++GO:1901562///response to paraquat+++GO:0009737///response to abscisic acid+++GO:0046322///negative regulation of fatty acid oxidation+++GO:0006979///response to oxidative stress+++GO:0010431///seed maturation+++GO:0006629///lipid metabolic process+++GO:0009644///response to high light inten…	LOC_Os04g53490
4329810	LOC4329810	mRNA	-0.375922	3.67726e-10	03040///Spliceosome		M00355///Spliceosome, 35S U5-snRNP+++M00398///Sm core complex+++M00354///Spliceosome, U4/U6.U5 tri-snRNP+++M00351///Spliceosome, U1-snRNP+++M00352///Spliceosome, U2-snRNP		GO:0005774///vacuolar membrane+++GO:0016607///nuclear speck+++GO:0016020///membrane+++GO:0005730///nucleolus	GO:0003729///mRNA binding	GO:0043484///regulation of RNA splicing+++GO:0035194///posttranscriptional gene silencing by RNA+++GO:0000387///spliceosomal snRNP assembly+++GO:0008380///RNA splicing
4330301	LOC4330301	mRNA	-0.431506	0.016738					GO:0005634///nucleus	GO:0030246///carbohydrate binding	GO:0016567///protein ubiquitination	LOC_Os02g45320
107278284	LOC107278284	mRNA	-11.047	0.0199774						GO:0005524///ATP binding+++GO:0051082///unfolded protein binding	GO:0006950///response to stress+++GO:0006457///protein folding
4327647	LOC4327647	mRNA	-0.712901	8.03681e-82	04912///GnRH signaling pathway+++04928///Parathyroid hormone synthesis, secretion and action+++01100///Metabolic pathways+++04072///Phospholipase D signaling pathway+++04014///Ras signaling pathway+++04724///Glutamatergic synapse+++00564///Glycerophospholipid metabolism+++01110///Biosynthesis of secondary metabolites+++04144///Endocytosis+++04024///cAMP signaling pathway+++04666///Fc gamma R-medi…			R07385///O-1-Alk-1-enyl-2-acyl-sn-glycero-3-phosphoethanolamine + H2O <=> 2-Acyl-1-(1-alkenyl)-sn-glycero-3-phosphate + Ethanolamine+++R02051///phosphatidylethanolamine phosphatidohydrolase Phosphatidylethanolamine + H2O <=> Ethanolamine + Phosphatidate+++R01310///phosphatidylcholine phosphatidohydrolase Phosphatidylcholine + H2O <=> Phosphatidate + Choline	GO:0016020///membrane	GO:0016787///hydrolase activity+++GO:0004630///phospholipase D activity+++GO:0003824///catalytic activity+++GO:0005509///calcium ion binding+++GO:0070290///N-acylphosphatidylethanolamine-specific phospholipase D activity	GO:0046470///phosphatidylcholine metabolic process+++GO:0006629///lipid metabolic process+++GO:0016042///lipid catabolic process	LOC_Os01g07760
4333171	LOC4333171	mRNA	-0.697287	3.71498e-35	01120///Microbial metabolism in diverse environments+++01110///Biosynthesis of secondary metabolites+++00230///Purine metabolism+++00983///Drug metabolism - other enzymes+++00232///Caffeine metabolism+++04146///Peroxisome+++01100///Metabolic pathways	H00192///Xanthinuria	M00546///Purine degradation, xanthine => urea	R07977///1,7-dimethylxanthine:oxygen oxidoreductase 1,7-Dimethylxanthine + Oxygen + H2O <=> 1,7-Dimethyluric acid + Hydrogen peroxide+++R07978///3,7-dimethylxanthine:oxygen oxidoreductase Theobromine + H2O + Oxygen <=> 3,7-Dimethyluric acid + Hydrogen peroxide+++R01768///hypoxanthine:NAD+ oxidoreductase Hypoxanthine + NAD+ + H2O <=> Xanthine + NADH + H++++R07979///7-methylxanthine:oxygen oxidored…	GO:0005829///cytosol	GO:0050660///flavin adenine dinucleotide binding+++GO:0016491///oxidoreductase activity+++GO:0071949///FAD binding+++GO:0051537///2 iron, 2 sulfur cluster binding+++GO:0046872///metal ion binding+++GO:0004854///xanthine dehydrogenase activity+++GO:0005506///iron ion binding+++GO:0051536///iron-sulfur cluster binding+++GO:0009055///electron transfer activity	GO:0022900///electron transport chain+++GO:0055114///oxidation-reduction process	LOC_Os03g31550
4329977	LOC4329977	mRNA	-0.440862	0.000106009					GO:0016021///integral component of membrane+++GO:0016020///membrane	GO:0022857///transmembrane transporter activity+++GO:0005338///nucleotide-sugar transmembrane transporter activity+++GO:0015297///antiporter activity	GO:0090480///purine nucleotide-sugar transmembrane transport+++GO:0008643///carbohydrate transport	LOC_Os02g40090
4334293	LOC4334293	mRNA	-1.03789	0.0171238		H00754///3-Methylglutaconic aciduria (MGCA)			GO:0016021///integral component of membrane+++GO:0005743///mitochondrial inner membrane			LOC_Os03g56540
4350352	LOC4350352	mRNA	-0.699503	5.52936e-06	04070///Phosphatidylinositol signaling system+++00562///Inositol phosphate metabolism+++01100///Metabolic pathways			R11680///1-Phosphatidyl-1D-myo-inositol 4-phosphate + H2O <=> 1-Phosphatidyl-D-myo-inositol + Orthophosphate	GO:0016021///integral component of membrane+++GO:0090404///pollen tube tip+++GO:0005886///plasma membrane+++GO:0009506///plasmodesma+++GO:0035619///root hair tip+++GO:0005783///endoplasmic reticulum+++GO:0005789///endoplasmic reticulum membrane+++GO:0030659///cytoplasmic vesicle membrane+++GO:0031520///plasma membrane of cell tip	GO:0043812///phosphatidylinositol-4-phosphate phosphatase activity	GO:0048768///root hair cell tip growth+++GO:0009611///response to wounding	LOC_Os11g20384
4334486	LOC4334486	mRNA	-0.560707	1.15059e-09					GO:0009524///phragmoplast+++GO:0005829///cytosol+++GO:0005576///extracellular region+++GO:0005856///cytoskeleton+++GO:0005618///cell wall+++GO:0000145///exocyst+++GO:0048471///perinuclear region of cytoplasm		GO:0051601///exocyst localization+++GO:0001927///exocyst assembly	LOC_Os03g58970
4329784	LOC4329784	mRNA	-0.630105	0.0272253								LOC_Os02g37070
4339599	LOC4339599	mRNA	-0.351308	1.81067e-06								LOC_Os05g48690
4332228	LOC4332228	mRNA	-0.884588	7.31482e-55							GO:0009723///response to ethylene+++GO:0009617///response to bacterium+++GO:0006952///defense response	LOC_Os03g14050
4343445	LOC4343445	mRNA	-0.74082	3.66997e-53	03013///RNA transport				GO:0005634///nucleus	GO:0003743///translation initiation factor activity+++GO:0003723///RNA binding	GO:0006413///translational initiation+++GO:0006412///translation+++GO:0006417///regulation of translation	LOC_Os07g34589
4325762	LOC4325762	mRNA	-2.05994	5.28477e-160	04626///Plant-pathogen interaction					GO:0005509///calcium ion binding+++GO:0046872///metal ion binding		LOC_Os01g72100
4334216	LOC4334216	mRNA	-0.777534	6.40725e-11					GO:0005634///nucleus	GO:0003677///DNA binding+++GO:0003700///DNA-binding transcription factor activity	GO:0016036///cellular response to phosphate starvation+++GO:0090548///response to nitrate starvation+++GO:0006351///transcription, DNA-templated+++GO:0006355///regulation of transcription, DNA-templated	LOC_Os03g55590
4323911	LOC4323911	mRNA	-0.479632	0.0248305					GO:0005634///nucleus	GO:0001135///RNA polymerase II transcription regulator recruiting activity+++GO:0044212///transcription regulatory region DNA binding+++GO:0000981///DNA-binding transcription factor activity, RNA polymerase II-specific+++GO:0043565///sequence-specific DNA binding+++GO:0003700///DNA-binding transcription factor activity	GO:0009751///response to salicylic acid+++GO:0030154///cell differentiation+++GO:0009753///response to jasmonic acid+++GO:0006357///regulation of transcription by RNA polymerase II+++GO:0006351///transcription, DNA-templated+++GO:0009739///response to gibberellin	LOC_Os01g19970
4332058	LOC4332058	mRNA	-0.831265	4.13761e-13					GO:0005634///nucleus	GO:0046872///metal ion binding+++GO:0003677///DNA binding	GO:0048440///carpel development+++GO:0030154///cell differentiation+++GO:0010022///meristem determinacy+++GO:0045165///cell fate commitment+++GO:0007275///multicellular organism development+++GO:0010094///specification of carpel identity+++GO:0009908///flower development+++GO:0048366///leaf development	LOC_Os03g11600
4324958	LOC4324958	mRNA	-0.869226	0.0102548					GO:0005634///nucleus	GO:0003712///transcription coregulator activity+++GO:0004402///histone acetyltransferase activity+++GO:0008270///zinc ion binding	GO:0006355///regulation of transcription, DNA-templated+++GO:0016573///histone acetylation	LOC_Os01g66890
4335430	LOC4335430	mRNA	-0.5788	5.37769e-25	01200///Carbon metabolism+++01230///Biosynthesis of amino acids+++01100///Metabolic pathways+++00030///Pentose phosphate pathway+++01110///Biosynthesis of secondary metabolites+++01120///Microbial metabolism in diverse environments+++01130///Biosynthesis of antibiotics+++00710///Carbon fixation in photosynthetic organisms	H01135///Ribose 5-phosphate isomerase (RPI) deficiency	M00580///Pentose phosphate pathway, archaea, fructose 6P => ribose 5P+++M00167///Reductive pentose phosphate cycle, glyceraldehyde-3P => ribulose-5P+++M00007///Pentose phosphate pathway, non-oxidative phase, fructose 6P => ribose 5P+++M00004///Pentose phosphate pathway (Pentose phosphate cycle)+++M00165///Reductive pentose phosphate cycle (Calvin cycle)	R01056///D-ribose-5-phosphate aldose-ketose-isomerase D-Ribose 5-phosphate <=> D-Ribulose 5-phosphate	GO:0005737///cytoplasm	GO:0004751///ribose-5-phosphate isomerase activity	GO:0009052///pentose-phosphate shunt, non-oxidative branch+++GO:0010228///vegetative to reproductive phase transition of meristem+++GO:0008219///cell death	LOC_Os04g24140
4343590	LOC4343590	mRNA	-0.95334	1.13871e-11					GO:0016020///membrane+++GO:0016021///integral component of membrane+++GO:0005886///plasma membrane+++GO:0005887///integral component of plasma membrane	GO:0022857///transmembrane transporter activity+++GO:0005215///transporter activity+++GO:0005351///carbohydrate:proton symporter activity+++GO:0015293///symporter activity	GO:0055085///transmembrane transport+++GO:0008643///carbohydrate transport+++GO:0034219///carbohydrate transmembrane transport+++GO:1902600///proton transmembrane transport	LOC_Os07g37320
4349402	LOC4349402	mRNA	-0.540897	6.57391e-08					GO:0009507///chloroplast+++GO:0009536///plastid	GO:0016491///oxidoreductase activity+++GO:0008113///peptide-methionine (S)-S-oxide reductase activity	GO:0006979///response to oxidative stress+++GO:0055114///oxidation-reduction process+++GO:0009651///response to salt stress
4331578	LOC4331578	mRNA	-0.326666	0.00142436								LOC_Os03g04830
4324718	LOC4324718	mRNA	-0.936614	4.84048e-25					GO:0009507///chloroplast	GO:0016301///kinase activity+++GO:0000287///magnesium ion binding+++GO:0005524///ATP binding+++GO:0004749///ribose phosphate diphosphokinase activity	GO:0009165///nucleotide biosynthetic process+++GO:0009116///nucleoside metabolic process	LOC_Os01g52530
4331069	LOC4331069	mRNA	-0.499503	4.34957e-24	03018///RNA degradation		M00395///Decapping complex	R10815///5'-(N7-methylguanosine 5'-triphospho)-[mRNA] N7-methylguanosine-5'-diphosphate phosphohydrolase m7G(5')pppR-mRNA + H2O <=> N7-Methylguanosine 5'-diphosphate + 5'-Phospho-[mRNA]	GO:0000932///P-body+++GO:0005737///cytoplasm	GO:0005524///ATP binding+++GO:0003729///mRNA binding+++GO:0030145///manganese ion binding+++GO:0000287///magnesium ion binding+++GO:0050072///m7G(5')pppN diphosphatase activity	GO:0031087///deadenylation-independent decapping of nuclear-transcribed mRNA+++GO:0009791///post-embryonic development+++GO:0006402///mRNA catabolic process+++GO:0000290///deadenylation-dependent decapping of nuclear-transcribed mRNA+++GO:0019048///modulation by virus of host morphology or physiology+++GO:0016441///posttranscriptional gene silencing+++GO:0010072///primary shoot apical meristem sp…	LOC_Os02g56210
4342652	LOC4342652	mRNA	-0.59667	4.22941e-39								LOC_Os07g09870
4332199	LOC4332199	mRNA	-0.357711	7.01359e-12							GO:0090421///embryonic meristem initiation+++GO:0009880///embryonic pattern specification+++GO:0001708///cell fate specification	LOC_Os03g13590
4329651	LOC4329651	mRNA	-0.468022	0.0021839
4330360	LOC4330360	mRNA	-0.330432	0.0237747								LOC_Os02g46220
4345676	LOC4345676	mRNA	-0.312312	1.64993e-05					GO:0005886///plasma membrane	GO:0008289///lipid binding		LOC_Os08g34060
4332948	LOC4332948	mRNA	-0.598245	9.37667e-12					GO:0016021///integral component of membrane	GO:0008270///zinc ion binding+++GO:0003676///nucleic acid binding	GO:0015074///DNA integration	LOC_Os03g25750
4329159	LOC4329159	mRNA	-0.552324	4.25641e-12						GO:0003723///RNA binding+++GO:0003676///nucleic acid binding	GO:0045836///positive regulation of meiotic nuclear division	LOC_Os02g21430
4343843	LOC4343843	mRNA	-0.416378	2.94046e-10	01110///Biosynthesis of secondary metabolites+++01200///Carbon metabolism+++01130///Biosynthesis of antibiotics+++01120///Microbial metabolism in diverse environments+++00030///Pentose phosphate pathway+++01100///Metabolic pathways		M00006///Pentose phosphate pathway, oxidative phase, glucose 6P => ribulose 5P+++M00004///Pentose phosphate pathway (Pentose phosphate cycle)+++M00008///Entner-Doudoroff pathway, glucose-6P => glyceraldehyde-3P + pyruvate	R02035///6-Phospho-D-glucono-1,5-lactone lactonohydrolase D-Glucono-1,5-lactone 6-phosphate + H2O <=> 6-Phospho-D-gluconate		GO:0017057///6-phosphogluconolactonase activity	GO:0006098///pentose-phosphate shunt+++GO:0005975///carbohydrate metabolic process	LOC_Os07g41280
4342143	LOC4342143	mRNA	-0.831737	2.63729e-12								LOC_Os06g51360
4340665	LOC4340665	mRNA	-2.73577	5.94367e-32	00073///Cutin, suberine and wax biosynthesis			R09463///18-hydroxyoleate:lipid-hydroperoxide oxidoreductase (9,10-epoxidising) 18-Hydroxyoleate + Lipid hydroperoxide <=> 9,10-Epoxy-18-hydroxystearate + Alcohol+++R09462///oleate:lipid-hydroperoxide oxidoreductase (9,10-epoxidising) (9Z)-Octadecenoic acid + Lipid hydroperoxide <=> cis-9,10-Epoxystearic acid + Alcohol	GO:0005811///lipid droplet	GO:0046872///metal ion binding+++GO:1990137///plant seed peroxidase activity	GO:0009819///drought recovery+++GO:0009737///response to abscisic acid	LOC_Os06g14370
9268371	LOC9268371	mRNA	-0.849353	2.57923e-16							GO:0006950///response to stress	LOC_Os05g28740
4344528	LOC4344528	mRNA	-0.428645	1.17161e-07								LOC_Os08g02460
4331940	LOC4331940	mRNA	-0.570523	0.00147338					GO:0019005///SCF ubiquitin ligase complex+++GO:0005634///nucleus		GO:0009937///regulation of gibberellic acid mediated signaling pathway+++GO:0016567///protein ubiquitination+++GO:0043161///proteasome-mediated ubiquitin-dependent protein catabolic process+++GO:0048831///regulation of shoot system development+++GO:0009740///gibberellic acid mediated signaling pathway
4325931	LOC4325931	mRNA	-1.14742	0.0266403					GO:0016021///integral component of membrane	GO:0005524///ATP binding+++GO:0004672///protein kinase activity
4336400	LOC4336400	mRNA	-1.33695	0.0312362					GO:0005634///nucleus	GO:0003677///DNA binding+++GO:0003700///DNA-binding transcription factor activity	GO:0006351///transcription, DNA-templated	LOC_Os04g43560
4347161	LOC4347161	mRNA	-0.714091	1.26532e-20					GO:0009507///chloroplast+++GO:0009570///chloroplast stroma+++GO:0009941///chloroplast envelope+++GO:0009535///chloroplast thylakoid membrane+++GO:0005739///mitochondrion+++GO:0009579///thylakoid+++GO:0048046///apoplast+++GO:0009536///plastid+++GO:0005759///mitochondrial matrix	GO:0051087///chaperone binding+++GO:0005524///ATP binding+++GO:0051082///unfolded protein binding+++GO:0005507///copper ion binding	GO:0009788///negative regulation of abscisic acid-activated signaling pathway+++GO:1901671///positive regulation of superoxide dismutase activity+++GO:0006986///response to unfolded protein+++GO:0009409///response to cold+++GO:0046686///response to cadmium ion+++GO:0051290///protein heterotetramerization+++GO:0051085///chaperone cofactor-dependent protein refolding	LOC_Os09g26730
4337212	LOC4337212	mRNA	-0.843348	9.89808e-05					GO:0016021///integral component of membrane			LOC_Os04g55490
4346199	LOC4346199	mRNA	-0.323041	0.0122607					GO:0016021///integral component of membrane+++GO:0016020///membrane			LOC_Os08g42960
9269134	LOC9269134	mRNA	-2.14112	0.0138636					GO:0005634///nucleus	GO:0044212///transcription regulatory region DNA binding	GO:0010158///abaxial cell fate specification+++GO:0006351///transcription, DNA-templated+++GO:0010229///inflorescence development+++GO:0006355///regulation of transcription, DNA-templated
4340750	LOC4340750	mRNA	-0.527153	2.41861e-07						GO:0004842///ubiquitin-protein transferase activity		LOC_Os06g16410
4331331	LOC4331331	mRNA	-0.460484	3.74359e-06					GO:0009941///chloroplast envelope+++GO:0009507///chloroplast			LOC_Os03g01730
9270058	LOC9270058	mRNA	-0.48803	0.0194131	03460///Fanconi anemia pathway		M00414///Bloom's syndrome complex				GO:0006281///DNA repair+++GO:0009555///pollen development+++GO:0043007///maintenance of rDNA+++GO:2000042///negative regulation of double-strand break repair via homologous recombination	LOC_Os03g47990
9266913	LOC9266913	mRNA	-0.387735	2.89529e-07					GO:0000127///transcription factor TFIIIC complex	GO:0001003///RNA polymerase III type 2 promoter sequence-specific DNA binding+++GO:0001002///RNA polymerase III type 1 promoter sequence-specific DNA binding	GO:0042791///5S class rRNA transcription by RNA polymerase III+++GO:0009304///tRNA transcription+++GO:0006359///regulation of transcription by RNA polymerase III+++GO:0006384///transcription initiation from RNA polymerase III promoter	LOC_Os02g21190
107279230	LOC107279230	mRNA	-0.422728	1.12482e-06					GO:0016021///integral component of membrane
4332111	LOC4332111	mRNA	-0.340547	8.41472e-07	04075///Plant hormone signal transduction				GO:0005634///nucleus	GO:0003700///DNA-binding transcription factor activity+++GO:0003677///DNA binding	GO:0009736///cytokinin-activated signaling pathway+++GO:0000160///phosphorelay signal transduction system+++GO:0007165///signal transduction+++GO:0006355///regulation of transcription, DNA-templated	LOC_Os03g12350
4338886	LOC4338886	mRNA	-0.428971	0.0098597					GO:0016021///integral component of membrane	GO:0016788///hydrolase activity, acting on ester bonds	GO:0044255///cellular lipid metabolic process	LOC_Os05g35730
107276884	LOC107276884	mRNA	-0.581493	0.00687023						GO:0035091///phosphatidylinositol binding		LOC_Os02g08310
4324747	LOC4324747	mRNA	-0.614819	0.0251658								LOC_Os01g64290
4341107	LOC4341107	mRNA	-1.4403	0.0418635								LOC_Os06g30370
4342043	LOC4342043	mRNA	-0.307502	5.63457e-05	01100///Metabolic pathways+++00565///Ether lipid metabolism+++00564///Glycerophospholipid metabolism			R01318///Acyl-CoA:1-acyl-sn-glycero-3-phosphocholine O-acyltransferase Acyl-CoA + 1-Acyl-sn-glycero-3-phosphocholine <=> CoA + Phosphatidylcholine+++R09036///acyl-CoA:1-acyl-sn-glycero-3-phosphoglycerol O-acyltransferase Acyl-CoA + 1-Acyl-sn-glycero-3-phosphoglycerol <=> CoA + Phosphatidylglycerol+++R03438///Acyl-CoA:1-alkyl-sn-glycero-3-phosphocholine O-acyltransferase Acyl-CoA + 1-Organyl-2-lys…	GO:0016021///integral component of membrane	GO:0050200///plasmalogen synthase activity+++GO:0071618///lysophosphatidylethanolamine acyltransferase activity+++GO:0005509///calcium ion binding	GO:0006644///phospholipid metabolic process+++GO:0008654///phospholipid biosynthetic process+++GO:0000038///very long-chain fatty acid metabolic process	LOC_Os06g49790
4334268	LOC4334268	mRNA	-0.591247	4.75457e-15								LOC_Os03g56220
4325662	LOC4325662	mRNA	-2.18782	7.31643e-83								LOC_Os01g09220
4340381	LOC4340381	mRNA	-2.9022	0.0353051								LOC_Os06g09350
4329950	LOC4329950	mRNA	-0.64361	0.00814578					GO:0005634///nucleus	GO:0008270///zinc ion binding		LOC_Os02g39710
9268561	LOC9268561	mRNA	-0.331243	0.0319959					GO:0000139///Golgi membrane+++GO:0005794///Golgi apparatus+++GO:0016021///integral component of membrane	GO:0046872///metal ion binding+++GO:0008289///lipid binding	GO:0006869///lipid transport+++GO:0009306///protein secretion
4328196	LOC4328196	mRNA	-0.313854	7.24505e-08					GO:0005739///mitochondrion+++GO:0016020///membrane+++GO:0045263///proton-transporting ATP synthase complex, coupling factor F(o)+++GO:0009507///chloroplast+++GO:0005753///mitochondrial proton-transporting ATP synthase complex+++GO:0005730///nucleolus	GO:0005507///copper ion binding+++GO:0008270///zinc ion binding+++GO:0050897///cobalt ion binding	GO:0009555///pollen development+++GO:0006811///ion transport	LOC_Os02g03860
9267662	LOC9267662	mRNA	-0.342854	0.0190969								LOC_Os03g02514
4326273	LOC4326273	mRNA	-0.309627	0.00193537	01110///Biosynthesis of secondary metabolites+++01100///Metabolic pathways+++00940///Phenylpropanoid biosynthesis			R04007///Donor:hydrogen-peroxide oxidoreductase 4-Coumaryl alcohol <=> p-Hydroxyphenyl lignin+++R07443///donor:hydrogen-peroxide oxidoreductase 5-Hydroxyconiferyl alcohol <=> 5-Hydroxy-guaiacyl lignin+++R03919///Donor:hydrogen-peroxide oxidoreductase Sinapyl alcohol <=> Syringyl lignin+++R02596///Donor:hydrogen-peroxide oxidoreductase Coniferyl alcohol <=> Guaiacyl lignin+++R00602///methanol:hydr…	GO:0005576///extracellular region+++GO:0009505///plant-type cell wall+++GO:0009506///plasmodesma	GO:0020037///heme binding+++GO:0046872///metal ion binding+++GO:0004601///peroxidase activity	GO:0042744///hydrogen peroxide catabolic process+++GO:0006979///response to oxidative stress+++GO:0009664///plant-type cell wall organization	LOC_Os01g16450
4331838	LOC4331838	mRNA	-1.40328	2.67692e-10								LOC_Os03g08390
107277647	LOC107277647	mRNA	-2.34814	4.52526e-05					GO:0005618///cell wall+++GO:0048046///apoplast	GO:0030145///manganese ion binding+++GO:0045735///nutrient reservoir activity
4347789	LOC4347789	mRNA	-0.631667	7.05896e-63					GO:0005634///nucleus	GO:0003677///DNA binding		LOC_Os09g37910
4338560	LOC4338560	mRNA	-1.2271	0.0391084	00500///Starch and sucrose metabolism+++01110///Biosynthesis of secondary metabolites+++00940///Phenylpropanoid biosynthesis+++01100///Metabolic pathways+++00460///Cyanoamino acid metabolism			R04998///beta-D-Glucosyl-2-coumarinate glucohydrolase cis-beta-D-Glucosyl-2-hydroxycinnamate + H2O <=> cis-2-Hydroxycinnamate + D-Glucose+++R04949///Cyanoglycoside glucohydrolase Cyanoglycoside + H2O <=> Cyanohydrin + D-Glucose+++R02887///1,4-beta-D-Glucan glucohydrolase Cellodextrin + (n-2) H2O <=> (n-2) D-Glucose + Cellobiose+++R02985///amygdalin beta-glucosidase Prunasin + D-Glucose <=> Amygda…		GO:0102483///scopolin beta-glucosidase activity+++GO:0016798///hydrolase activity, acting on glycosyl bonds+++GO:0016787///hydrolase activity+++GO:0008422///beta-glucosidase activity+++GO:0004553///hydrolase activity, hydrolyzing O-glycosyl compounds	GO:0005975///carbohydrate metabolic process+++GO:0008152///metabolic process	LOC_Os05g30350
4336637	LOC4336637	mRNA	-0.416212	3.7127e-10	01110///Biosynthesis of secondary metabolites+++00062///Fatty acid elongation+++01040///Biosynthesis of unsaturated fatty acids+++01100///Metabolic pathways			R08180///(4Z,7Z,10Z,13Z,16Z,19Z)-Docosahexaenoyl-CoA + H2O <=> CoA + (4Z,7Z,10Z,13Z,16Z,19Z)-Docosahexaenoic acid+++R09450///long-chain fatty-acyl-CoA hydrolase Long-chain acyl-CoA + H2O <=> Long-chain fatty acid + CoA+++R08177///Linoleoyl-CoA hydrolase Linoleoyl-CoA + H2O <=> CoA + Linoleate+++R08178///(9Z,12Z,15Z)-Octadecatrienoyl-CoA + H2O <=> CoA + (9Z,12Z,15Z)-Octadecatrienoic acid+++R01274/…		GO:0047617///acyl-CoA hydrolase activity	GO:0006637///acyl-CoA metabolic process	LOC_Os04g47120
4331115	LOC4331115	mRNA	-2.14935	7.69702e-66								LOC_Os02g56900
4331577	LOC4331577	mRNA	-1.77335	1.46233e-08	00500///Starch and sucrose metabolism			R11262///maltodextrin maltohydrolase Maltodextrin + H2O <=> Maltose+++R02112///1,4-alpha-D-Glucan maltohydrolase Starch <=> Dextrin + Maltose	GO:0009507///chloroplast	GO:0016161///beta-amylase activity+++GO:0102229///amylopectin maltohydrolase activity	GO:0000272///polysaccharide catabolic process	LOC_Os03g04770
4324284	LOC4324284	mRNA	-0.440265	0.0397822					GO:0046658///anchored component of plasma membrane		GO:0051716///cellular response to stimulus	LOC_Os01g13210
9266341	LOC9266341	mRNA	-0.315507	0.00270596					GO:0009535///chloroplast thylakoid membrane+++GO:0009570///chloroplast stroma+++GO:0009507///chloroplast+++GO:0042651///thylakoid membrane+++GO:0009534///chloroplast thylakoid+++GO:0016021///integral component of membrane	GO:0046872///metal ion binding+++GO:0016787///hydrolase activity	GO:0008152///metabolic process+++GO:0010196///nonphotochemical quenching+++GO:0045454///cell redox homeostasis	LOC_Os03g19760
4345203	LOC4345203	mRNA	-0.413707	4.7571e-08								LOC_Os08g20020
4338950	LOC4338950	mRNA	-1.09182	2.68898e-55							GO:0006396///RNA processing	LOC_Os05g37520
4341560	LOC4341560	mRNA	-0.448086	0.0175711					GO:0005829///cytosol	GO:0050662///coenzyme binding+++GO:0016621///cinnamoyl-CoA reductase activity	GO:0009409///response to cold+++GO:0007623///circadian rhythm+++GO:0009809///lignin biosynthetic process	LOC_Os06g41840
4352601	LOC4352601	mRNA	-0.549735	5.08382e-15					GO:0005737///cytoplasm	GO:0003729///mRNA binding	GO:0006417///regulation of translation	LOC_Os12g38590
4331149	LOC4331149	mRNA	-0.628183	3.08991e-26	04075///Plant hormone signal transduction				GO:0005634///nucleus		GO:0009734///auxin-activated signaling pathway+++GO:0006355///regulation of transcription, DNA-templated	LOC_Os02g57250
4324717	LOC4324717	mRNA	-0.425871	2.80758e-18	00620///Pyruvate metabolism+++01100///Metabolic pathways+++00710///Carbon fixation in photosynthetic organisms+++01200///Carbon metabolism+++01120///Microbial metabolism in diverse environments		M00172///C4-dicarboxylic acid cycle, NADP - malic enzyme type+++M00169///CAM (Crassulacean acid metabolism), light	R00216///(S)-Malate:NADP+ oxidoreductase(oxaloacetate-decarboxylating) (S)-Malate + NADP+ <=> Pyruvate + CO2 + NADPH + H+	GO:0005737///cytoplasm	GO:0051287///NAD binding+++GO:0046872///metal ion binding+++GO:0016491///oxidoreductase activity+++GO:0004471///malate dehydrogenase (decarboxylating) (NAD+) activity+++GO:0004470///malic enzyme activity	GO:0055114///oxidation-reduction process	LOC_Os01g52500
4324479	LOC4324479	mRNA	-0.702669	0.00365398	00195///Photosynthesis+++01100///Metabolic pathways				GO:0009535///chloroplast thylakoid membrane+++GO:0009654///photosystem II oxygen evolving complex	GO:0010242///oxygen evolving activity	GO:0042549///photosystem II stabilization+++GO:0010207///photosystem II assembly	LOC_Os01g31690
4336945	LOC4336945	mRNA	-0.315677	8.60492e-06							GO:0006355///regulation of transcription, DNA-templated	LOC_Os04g52074
4347423	LOC4347423	mRNA	-1.12658	2.27588e-42						GO:0008270///zinc ion binding+++GO:0003677///DNA binding+++GO:0046872///metal ion binding		LOC_Os09g31200
4332235	LOC4332235	mRNA	-4.58251	0.0142892								LOC_Os03g14150
9270353	LOC9270353	mRNA	-0.311037	6.36874e-10	00480///Glutathione metabolism+++01100///Metabolic pathways	H00668///Anemia due to disorders of glutathione metabolism		R00251///5-oxo-L-proline amidohydrolase (ATP-hydrolysing) ATP + 5-Oxoproline + 2 H2O <=> ADP + Orthophosphate + L-Glutamate	GO:0009506///plasmodesma+++GO:0005829///cytosol+++GO:0005737///cytoplasm	GO:0017168///5-oxoprolinase (ATP-hydrolyzing) activity+++GO:0005524///ATP binding	GO:0006751///glutathione catabolic process	LOC_Os01g73514
4352016	LOC4352016	mRNA	-1.94153	0.00683001	00710///Carbon fixation in photosynthetic organisms+++01120///Microbial metabolism in diverse environments+++01100///Metabolic pathways+++01200///Carbon metabolism+++00630///Glyoxylate and dicarboxylate metabolism		M00166///Reductive pentose phosphate cycle, ribulose-5P => glyceraldehyde-3P+++M00532///Photorespiration+++M00165///Reductive pentose phosphate cycle (Calvin cycle)	R00024///3-phospho-D-glycerate carboxy-lyase (dimerizing; D-ribulose-1,5-bisphosphate-forming) D-Ribulose 1,5-bisphosphate + CO2 + H2O <=> 2 3-Phospho-D-glycerate+++R03140///D-Ribulose 1,5-bisphosphate oxygenase D-Ribulose 1,5-bisphosphate + Oxygen <=> 3-Phospho-D-glycerate + 2-Phosphoglycolate	GO:0009507///chloroplast	GO:0016984///ribulose-bisphosphate carboxylase activity+++GO:0004497///monooxygenase activity	GO:0019253///reductive pentose-phosphate cycle+++GO:0009853///photorespiration
4341621	LOC4341621	mRNA	-0.371833	3.80196e-11					GO:0016021///integral component of membrane	GO:0005524///ATP binding+++GO:0004672///protein kinase activity		LOC_Os06g43270
4351671	LOC4351671	mRNA	-0.361515	3.95719e-12	01100///Metabolic pathways+++04623///Cytosolic DNA-sensing pathway+++03020///RNA polymerase+++00240///Pyrimidine metabolism+++00230///Purine metabolism		M00181///RNA polymerase III, eukaryotes+++M00182///RNA polymerase I, eukaryotes+++M00180///RNA polymerase II, eukaryotes	R00442///CTP:RNA cytidylyltransferase (DNA-directed); CTP:RNA CTP + RNA <=> Diphosphate + RNA+++R00443///UTP:RNA uridylyltransferase UTP + RNA <=> Diphosphate + RNA+++R00441///GTP:RNA guanylyltransferase (DNA-directed); GTP:RNA GTP + RNA <=> Diphosphate + RNA+++R00435///ATP:polynucleotide adenylyltransferase; ATP:RNA ATP + RNA <=> Diphosphate + RNA	GO:0005634///nucleus	GO:0003677///DNA binding+++GO:0003899///DNA-directed 5'-3' RNA polymerase activity+++GO:0008270///zinc ion binding	GO:0006351///transcription, DNA-templated
4333212	LOC4333212	mRNA	-0.333522	0.00472336		H00848///Ataxia with ocular apraxia (AOA)+++H01891///Autosomal recessive spinocerebellar ataxias+++H00058///Amyotrophic lateral sclerosis (ALS)			GO:0005634///nucleus	GO:0005524///ATP binding+++GO:0004386///helicase activity	GO:0009875///pollen-pistil interaction+++GO:0010183///pollen tube guidance+++GO:0009553///embryo sac development	LOC_Os03g32526
4324867	LOC4324867	mRNA	-0.532091	2.52205e-10						GO:0003676///nucleic acid binding		LOC_Os01g68160
9267168	LOC9267168	mRNA	-0.336745	0.00192458
4329088	LOC4329088	mRNA	-0.736231	0.00145568					GO:0016021///integral component of membrane			LOC_Os02g19650
4347629	LOC4347629	mRNA	-0.34723	0.0132145						GO:0061630///ubiquitin protein ligase activity+++GO:0046872///metal ion binding+++GO:0031624///ubiquitin conjugating enzyme binding+++GO:0004842///ubiquitin-protein transferase activity	GO:0048437///floral organ development+++GO:0051865///protein autoubiquitination+++GO:0043161///proteasome-mediated ubiquitin-dependent protein catabolic process+++GO:0046621///negative regulation of organ growth+++GO:1900057///positive regulation of leaf senescence+++GO:0008285///negative regulation of cell proliferation+++GO:0016567///protein ubiquitination	LOC_Os09g35690
4328085	LOC4328085	mRNA	-0.375971	0.0043142					GO:0009507///chloroplast+++GO:0009570///chloroplast stroma+++GO:0009535///chloroplast thylakoid membrane		GO:0009735///response to cytokinin	LOC_Os02g02520
4340505	LOC4340505	mRNA	-1.05291	1.31479e-06
107278759	LOC107278759	mRNA	-0.350057	0.00188163					GO:0005886///plasma membrane	GO:0043531///ADP binding+++GO:0003677///DNA binding	GO:0006952///defense response+++GO:0007165///signal transduction	LOC_Os04g53160
4339101	LOC4339101	mRNA	-0.965735	1.53516e-19						GO:0004842///ubiquitin-protein transferase activity		LOC_Os05g39930
4338939	LOC4338939	mRNA	-0.761371	4.57086e-09								LOC_Os05g37340
4345558	LOC4345558	mRNA	-0.369025	5.03641e-18					GO:0005730///nucleolus	GO:0003723///RNA binding+++GO:0003676///nucleic acid binding		LOC_Os08g31810
4347637	LOC4347637	mRNA	-0.877072	0.00189973					GO:0005634///nucleus	GO:0000978///RNA polymerase II proximal promoter sequence-specific DNA binding+++GO:0043565///sequence-specific DNA binding+++GO:0003677///DNA binding+++GO:0003700///DNA-binding transcription factor activity	GO:0034605///cellular response to heat+++GO:0006355///regulation of transcription, DNA-templated+++GO:0061408///positive regulation of transcription from RNA polymerase II promoter in response to heat stress	LOC_Os09g35790
4339072	LOC4339072	mRNA	-0.329577	2.87463e-08	04141///Protein processing in endoplasmic reticulum				GO:0036513///Derlin-1 retrotranslocation complex	GO:0044390///ubiquitin-like protein conjugating enzyme binding	GO:0071712///ER-associated misfolded protein catabolic process	LOC_Os05g39380
4347433	LOC4347433	mRNA	-0.578756	0.0088024								LOC_Os09g31360
4330051	LOC4330051	mRNA	-0.505543	1.92373e-12					GO:0005615///extracellular space	GO:0046870///cadmium ion binding	GO:0055073///cadmium ion homeostasis+++GO:0006952///defense response	LOC_Os02g41904
9267893	LOC9267893	mRNA	-0.507103	2.17475e-07					GO:0016021///integral component of membrane
4337812	LOC4337812	mRNA	-0.597281	1.06338e-09					GO:0009507///chloroplast+++GO:0009536///plastid		GO:0010150///leaf senescence+++GO:0034599///cellular response to oxidative stress
4336155	LOC4336155	mRNA	-0.341769	3.62448e-10						GO:0008270///zinc ion binding	GO:0006355///regulation of transcription, DNA-templated	LOC_Os04g40060
4350605	LOC4350605	mRNA	-0.486314	0.00984022	01100///Metabolic pathways+++04723///Retrograde endocannabinoid signaling+++04714///Thermogenesis+++00190///Oxidative phosphorylation		M00146///NADH dehydrogenase (ubiquinone) 1 alpha subcomplex		GO:0009507///chloroplast	GO:0031177///phosphopantetheine binding	GO:0006633///fatty acid biosynthetic process	LOC_Os11g31900
4337330	LOC4337330	mRNA	-0.328375	0.000670376					GO:0005730///nucleolus+++GO:0005634///nucleus+++GO:0005737///cytoplasm	GO:0000166///nucleotide binding+++GO:0005524///ATP binding
4325070	LOC4325070	mRNA	-0.318327	2.8207e-06	04138///Autophagy - yeast+++04130///SNARE interactions in vesicular transport				GO:0005886///plasma membrane+++GO:0016021///integral component of membrane+++GO:0031201///SNARE complex	GO:0005484///SNAP receptor activity+++GO:0000149///SNARE binding	GO:0015031///protein transport+++GO:0006906///vesicle fusion+++GO:0006887///exocytosis	LOC_Os01g64650
4338861	LOC4338861	mRNA	-1.05735	0.0278945	01110///Biosynthesis of secondary metabolites+++00360///Phenylalanine metabolism+++00940///Phenylpropanoid biosynthesis+++01100///Metabolic pathways		M00137///Flavanone biosynthesis, phenylalanine => naringenin+++M00039///Monolignol biosynthesis, phenylalanine/tyrosine => monolignol+++M00350///Capsaicin biosynthesis, L-Phenylalanine => Capsaicin	R00697///L-phenylalanine ammonia-lyase (trans-cinnamate-forming) L-Phenylalanine <=> trans-Cinnamate + Ammonia	GO:0005737///cytoplasm	GO:0045548///phenylalanine ammonia-lyase activity	GO:0009800///cinnamic acid biosynthetic process+++GO:0006559///L-phenylalanine catabolic process	LOC_Os05g35290
4342825	LOC4342825	mRNA	-0.543919	5.69685e-14					GO:0016021///integral component of membrane	GO:0004650///polygalacturonase activity	GO:0005975///carbohydrate metabolic process	LOC_Os07g14160
4352818	LOC4352818	mRNA	-0.458231	1.83848e-06					GO:0005634///nucleus	GO:0046872///metal ion binding	GO:0010158///abaxial cell fate specification+++GO:0007275///multicellular organism development+++GO:0045165///cell fate commitment	LOC_Os12g42610
9266258	LOC9266258	mRNA	-0.3788	1.01187e-11					GO:0005829///cytosol	GO:0005524///ATP binding+++GO:0004672///protein kinase activity+++GO:0004674///protein serine/threonine kinase activity	GO:0009651///response to salt stress+++GO:1901002///positive regulation of response to salt stress+++GO:0009933///meristem structural organization+++GO:0042538///hyperosmotic salinity response
4349159	LOC4349159	mRNA	-0.463258	4.07585e-08					GO:0016021///integral component of membrane			LOC_Os10g38030
4349868	LOC4349868	mRNA	-0.957128	4.47324e-19								LOC_Os11g06440
9269996	LOC9269996	mRNA	-0.330262	0.0066284					GO:0005774///vacuolar membrane+++GO:0016021///integral component of membrane	GO:0015297///antiporter activity+++GO:0015238///drug transmembrane transporter activity	GO:0006855///drug transmembrane transport+++GO:0046618///drug export	LOC_Os05g48040
4323930	LOC4323930	mRNA	-0.669352	2.03372e-13					GO:0009570///chloroplast stroma			LOC_Os01g34080
9272427	LOC9272427	mRNA	-0.454689	0.00634915	04152///AMPK signaling pathway+++01130///Biosynthesis of antibiotics+++01100///Metabolic pathways+++00900///Terpenoid backbone biosynthesis+++01110///Biosynthesis of secondary metabolites+++04976///Bile secretion		M00849///C5 isoprenoid biosynthesis, mevalonate pathway, archaea+++M00095///C5 isoprenoid biosynthesis, mevalonate pathway	R02082///(R)-Mevalonate:NADP+ oxidoreductase (CoA acylating) (R)-Mevalonate + CoA + 2 NADP+ <=> (S)-3-Hydroxy-3-methylglutaryl-CoA + 2 NADPH + 2 H+	GO:0016020///membrane+++GO:0005778///peroxisomal membrane+++GO:0005789///endoplasmic reticulum membrane+++GO:0016021///integral component of membrane+++GO:0005783///endoplasmic reticulum	GO:0016616///oxidoreductase activity, acting on the CH-OH group of donors, NAD or NADP as acceptor+++GO:0016491///oxidoreductase activity+++GO:0042282///hydroxymethylglutaryl-CoA reductase activity+++GO:0050661///NADP binding+++GO:0004420///hydroxymethylglutaryl-CoA reductase (NADPH) activity+++GO:0050662///coenzyme binding	GO:0055114///oxidation-reduction process+++GO:0016126///sterol biosynthetic process+++GO:0008299///isoprenoid biosynthetic process+++GO:0015936///coenzyme A metabolic process	LOC_Os02g48330
4327407	LOC4327407	mRNA	-0.636601	9.06293e-08					GO:0005576///extracellular region+++GO:0005773///vacuole	GO:0004185///serine-type carboxypeptidase activity	GO:0051603///proteolysis involved in cellular protein catabolic process
9272621	LOC9272621	mRNA	-0.780251	0.000127544					GO:0005634///nucleus	GO:0003700///DNA-binding transcription factor activity+++GO:0046872///metal ion binding+++GO:0044212///transcription regulatory region DNA binding	GO:0010431///seed maturation+++GO:0010029///regulation of seed germination+++GO:0009937///regulation of gibberellic acid mediated signaling pathway+++GO:0006355///regulation of transcription, DNA-templated+++GO:0006351///transcription, DNA-templated	LOC_Os09g38340
4328641	LOC4328641	mRNA	-0.699069	2.37651e-13								LOC_Os02g10630
4330110	LOC4330110	mRNA	-0.319529	0.0113633					GO:0005886///plasma membrane+++GO:0016020///membrane+++GO:0012505///endomembrane system+++GO:0016021///integral component of membrane	GO:0005496///steroid binding+++GO:0020037///heme binding		LOC_Os02g42740
4330689	LOC4330689	mRNA	-0.407027	1.01335e-20					GO:0016021///integral component of membrane+++GO:0016020///membrane	GO:0022857///transmembrane transporter activity	GO:0055085///transmembrane transport	LOC_Os02g50820
9269313	LOC9269313	mRNA	-0.380209	2.13934e-12
9268032	LOC9268032	mRNA	-0.480266	0.000154961					GO:0005634///nucleus	GO:0003677///DNA binding	GO:0006351///transcription, DNA-templated+++GO:0006355///regulation of transcription, DNA-templated	LOC_Os09g37710
4324377	LOC4324377	mRNA	-1.15214	1.045e-91					GO:0016021///integral component of membrane	GO:0015174///basic amino acid transmembrane transporter activity		LOC_Os01g16170
4347261	LOC4347261	mRNA	-0.497562	2.36035e-06	00906///Carotenoid biosynthesis			R07202///abscisate,NADPH:oxygen oxidoreductase (8'-hydroxylating) Abscisate + NADPH + H+ + Oxygen <=> 8'-Hydroxyabscisate + NADP+ + H2O	GO:0016021///integral component of membrane+++GO:0016020///membrane	GO:0016705///oxidoreductase activity, acting on paired donors, with incorporation or reduction of molecular oxygen+++GO:0010295///(+)-abscisic acid 8'-hydroxylase activity+++GO:0046872///metal ion binding+++GO:0016491///oxidoreductase activity+++GO:0020037///heme binding+++GO:0005506///iron ion binding+++GO:0004497///monooxygenase activity	GO:0055114///oxidation-reduction process+++GO:0016125///sterol metabolic process+++GO:0046345///abscisic acid catabolic process	LOC_Os09g28390
107276144	LOC107276144	mRNA	-0.318477	7.52521e-09					GO:0005634///nucleus	GO:0003682///chromatin binding+++GO:0042393///histone binding	GO:0006338///chromatin remodeling+++GO:2000779///regulation of double-strand break repair	LOC_Os03g29960
4348936	LOC4348936	mRNA	-0.420321	7.22851e-06						GO:0003824///catalytic activity+++GO:0030170///pyridoxal phosphate binding	GO:0009058///biosynthetic process	LOC_Os10g34350
4325344	LOC4325344	mRNA	-0.311771	3.47122e-05					GO:0005737///cytoplasm+++GO:0005730///nucleolus	GO:0005524///ATP binding+++GO:0003723///RNA binding+++GO:0004004///ATP-dependent RNA helicase activity	GO:0010501///RNA secondary structure unwinding	LOC_Os01g08930
4336318	LOC4336318	mRNA	-0.331474	1.61284e-07					GO:0016021///integral component of membrane		GO:0055085///transmembrane transport	LOC_Os04g42420
4332115	LOC4332115	mRNA	-1.63661	1.04379e-23	04016///MAPK signaling pathway - plant				GO:0005737///cytoplasm+++GO:0005634///nucleus	GO:0004708///MAP kinase kinase activity+++GO:0030295///protein kinase activator activity+++GO:0005524///ATP binding+++GO:0004674///protein serine/threonine kinase activity	GO:0010150///leaf senescence+++GO:0009873///ethylene-activated signaling pathway+++GO:0046777///protein autophosphorylation+++GO:0009651///response to salt stress+++GO:0009611///response to wounding+++GO:0010120///camalexin biosynthetic process+++GO:0007346///regulation of mitotic cell cycle+++GO:0031098///stress-activated protein kinase signaling cascade+++GO:0045893///positive regulation of tra…	LOC_Os03g12390
4334196	LOC4334196	mRNA	-0.324229	0.00827767	00330///Arginine and proline metabolism+++01100///Metabolic pathways	H02041///Myopia		R01252///L-Proline,2-oxoglutarate:oxygen oxidoreductase (4-hydroxylating) L-Proline + 2-Oxoglutarate + Oxygen <=> Hydroxyproline + Succinate + CO2	GO:0005794///Golgi apparatus+++GO:0005789///endoplasmic reticulum membrane+++GO:0016021///integral component of membrane	GO:0004656///procollagen-proline 4-dioxygenase activity+++GO:0005506///iron ion binding+++GO:0031418///L-ascorbic acid binding		LOC_Os03g55380
4338937	LOC4338937	mRNA	-0.73433	9.30291e-10					GO:0005789///endoplasmic reticulum membrane+++GO:0043231///intracellular membrane-bounded organelle+++GO:0016021///integral component of membrane	GO:0018685///alkane 1-monooxygenase activity+++GO:0020037///heme binding+++GO:0005506///iron ion binding	GO:0009611///response to wounding	LOC_Os05g37250
4344073	LOC4344073	mRNA	-0.310903	3.59875e-08	00901///Indole alkaloid biosynthesis+++03440///Homologous recombination+++03430///Mismatch repair+++01110///Biosynthesis of secondary metabolites+++03460///Fanconi anemia pathway+++03030///DNA replication+++03420///Nucleotide excision repair		M00288///RPA complex	R05880///17-O-acetylnorajmaline O-acetylhydrolase 17-O-Acetylnorajmaline + H2O <=> Norajmaline + Acetate		GO:0005524///ATP binding+++GO:0003678///DNA helicase activity	GO:0006310///DNA recombination+++GO:0000723///telomere maintenance+++GO:0006281///DNA repair
4336198	LOC4336198	mRNA	-0.92014	0.00151775
9272001	LOC9272001	mRNA	-0.988409	2.89791e-06					GO:0005576///extracellular region+++GO:0005618///cell wall	GO:0005199///structural constituent of cell wall	GO:0071555///cell wall organization	LOC_Os07g07990
4332625	LOC4332625	mRNA	-4.97293	0.00401239					GO:0005618///cell wall+++GO:0005576///extracellular region	GO:0045330///aspartyl esterase activity+++GO:0030599///pectinesterase activity	GO:0045490///pectin catabolic process+++GO:0042545///cell wall modification	LOC_Os03g19610
4329142	LOC4329142	mRNA	-1.23311	6.14506e-25						GO:0004190///aspartic-type endopeptidase activity		LOC_Os02g21040
4350330	LOC4350330	mRNA	-0.507945	1.5327e-17
4325974	LOC4325974	mRNA	-0.519884	0.00592487					GO:0016021///integral component of membrane+++GO:0005774///vacuolar membrane+++GO:0016020///membrane+++GO:0005773///vacuole	GO:0008324///cation transmembrane transporter activity	GO:0098655///cation transmembrane transport+++GO:0006812///cation transport+++GO:0006811///ion transport+++GO:0055085///transmembrane transport
4330396	LOC4330396	mRNA	-0.396854	0.0126802					GO:0009507///chloroplast	GO:0004672///protein kinase activity+++GO:0005524///ATP binding		LOC_Os02g46750
4334560	LOC4334560	mRNA	-0.446646	5.17023e-17					GO:0005634///nucleus	GO:0003746///translation elongation factor activity+++GO:0008270///zinc ion binding	GO:0009910///negative regulation of flower development+++GO:0009739///response to gibberellin+++GO:0009845///seed germination+++GO:0034243///regulation of transcription elongation from RNA polymerase II promoter+++GO:0010162///seed dormancy process+++GO:0006351///transcription, DNA-templated
4344036	LOC4344036	mRNA	-0.326859	0.00742074	04213///Longevity regulating pathway - multiple species+++04150///mTOR signaling pathway+++04714///Thermogenesis+++04921///Oxytocin signaling pathway+++04371///Apelin signaling pathway+++04922///Glucagon signaling pathway+++04920///Adipocytokine signaling pathway+++04910///Insulin signaling pathway+++04530///Tight junction+++04151///PI3K-Akt signaling pathway+++04068///FoxO signaling pathway+++04…				GO:0005622///intracellular	GO:0005524///ATP binding+++GO:0004672///protein kinase activity+++GO:0016301///kinase activity+++GO:0016740///transferase activity+++GO:0004674///protein serine/threonine kinase activity+++GO:0000166///nucleotide binding	GO:0006468///protein phosphorylation+++GO:0007165///signal transduction+++GO:0016310///phosphorylation	LOC_Os07g44290
4351997	LOC4351997	mRNA	-0.610257	4.86161e-14	00062///Fatty acid elongation			R01274///palmitoyl-CoA hydrolase Palmitoyl-CoA + H2O <=> CoA + Hexadecanoic acid				LOC_Os12g18860
4339298	LOC4339298	mRNA	-0.675965	0.00113717					GO:0005634///nucleus	GO:0043565///sequence-specific DNA binding+++GO:0003677///DNA binding+++GO:0003700///DNA-binding transcription factor activity	GO:0006355///regulation of transcription, DNA-templated	LOC_Os05g43760
4332305	LOC4332305	mRNA	-0.755673	1.86573e-07						GO:0016787///hydrolase activity	GO:0009056///catabolic process	LOC_Os03g15270
4339776	LOC4339776	mRNA	-0.388857	1.6467e-18					GO:0016021///integral component of membrane			LOC_Os05g51140
4341099	LOC4341099	mRNA	-0.316576	5.70137e-13								LOC_Os06g30060
4329550	LOC4329550	mRNA	-0.667172	2.25022e-06								LOC_Os02g32970
107277185	LOC107277185	mRNA	-2.50685	0.00692086
4325216	LOC4325216	mRNA	-0.338865	1.0885e-06								LOC_Os01g05540
4327887	LOC4327887	mRNA	-0.458226	8.12635e-06	00908///Zeatin biosynthesis			R05708///N6-dimethylallyladenine:(acceptor) oxidoreductase N6-(Delta2-Isopentenyl)-adenine + H2O + Acceptor <=> Adenine + 3-Methyl-2-butenal + Reduced acceptor	GO:0005615///extracellular space+++GO:0005576///extracellular region	GO:0050660///flavin adenine dinucleotide binding+++GO:0003824///catalytic activity+++GO:0019139///cytokinin dehydrogenase activity+++GO:0071949///FAD binding+++GO:0016491///oxidoreductase activity	GO:0009690///cytokinin metabolic process+++GO:0055114///oxidation-reduction process	LOC_Os01g56810
4332012	LOC4332012	mRNA	-0.370771	0.00226567	04216///Ferroptosis+++04142///Lysosome+++04978///Mineral absorption	H01196///Hypochromic microcytic anemia			GO:0016021///integral component of membrane+++GO:0016020///membrane	GO:0046873///metal ion transmembrane transporter activity+++GO:0005384///manganese ion transmembrane transporter activity+++GO:0015086///cadmium ion transmembrane transporter activity	GO:0070574///cadmium ion transmembrane transport+++GO:0071421///manganese ion transmembrane transport+++GO:0055072///iron ion homeostasis+++GO:0006811///ion transport+++GO:0030001///metal ion transport	LOC_Os03g11010
4341938	LOC4341938	mRNA	-0.480992	0.0436497					GO:0009536///plastid+++GO:0012506///vesicle membrane+++GO:0016020///membrane+++GO:0009507///chloroplast	GO:0050660///flavin adenine dinucleotide binding+++GO:0000287///magnesium ion binding+++GO:0003824///catalytic activity+++GO:0016740///transferase activity+++GO:0005524///ATP binding+++GO:0003984///acetolactate synthase activity+++GO:0005460///UDP-glucose transmembrane transporter activity+++GO:0030976///thiamine pyrophosphate binding+++GO:0005515///protein binding+++GO:0000166///nucleotide bindi…	GO:0009097///isoleucine biosynthetic process+++GO:0009099///valine biosynthetic process+++GO:0035435///phosphate ion transmembrane transport+++GO:0015786///UDP-glucose transmembrane transport+++GO:0009082///branched-chain amino acid biosynthetic process+++GO:0008652///cellular amino acid biosynthetic process+++GO:0010044///response to aluminum ion+++GO:0009635///response to herbicide	LOC_Os06g48060
4329593	LOC4329593	mRNA	-0.449156	1.35472e-25	01110///Biosynthesis of secondary metabolites+++01100///Metabolic pathways+++00340///Histidine metabolism	H00862///Tourette syndrome		R01167///L-histidine carboxy-lyase (histamine-forming) L-Histidine <=> Histamine + CO2	GO:0005886///plasma membrane+++GO:0005829///cytosol	GO:0003824///catalytic activity+++GO:0016831///carboxy-lyase activity+++GO:0030170///pyridoxal phosphate binding+++GO:0016829///lyase activity	GO:0019752///carboxylic acid metabolic process	LOC_Os02g33710
9268771	LOC9268771	mRNA	-0.783449	0.0018614					GO:0005634///nucleus	GO:0003677///DNA binding+++GO:0003700///DNA-binding transcription factor activity	GO:0009873///ethylene-activated signaling pathway+++GO:0006351///transcription, DNA-templated	LOC_Os02g42585
4339437	LOC4339437	mRNA	-0.581484	0.00419418					GO:0048046///apoplast+++GO:0005618///cell wall+++GO:0009506///plasmodesma+++GO:0005886///plasma membrane+++GO:0031225///anchored component of membrane+++GO:0046658///anchored component of plasma membrane	GO:0030247///polysaccharide binding+++GO:0004553///hydrolase activity, hydrolyzing O-glycosyl compounds+++GO:0042973///glucan endo-1,3-beta-D-glucosidase activity	GO:0006952///defense response+++GO:0005975///carbohydrate metabolic process+++GO:0009664///plant-type cell wall organization	LOC_Os05g45860
4344182	LOC4344182	mRNA	-1.02074	2.9189e-26	04139///Mitophagy - yeast				GO:0005634///nucleus	GO:0036459///thiol-dependent ubiquitinyl hydrolase activity	GO:0006511///ubiquitin-dependent protein catabolic process+++GO:0016579///protein deubiquitination
9268727	LOC9268727	mRNA	-0.329405	0.0346088					GO:0005737///cytoplasm+++GO:0005634///nucleus	GO:0046872///metal ion binding+++GO:0004722///protein serine/threonine phosphatase activity	GO:0061416///regulation of transcription from RNA polymerase II promoter in response to salt stress+++GO:0009737///response to abscisic acid+++GO:0009651///response to salt stress+++GO:0009414///response to water deprivation
4338767	LOC4338767	mRNA	-1.21096	7.88168e-56								LOC_Os05g33820
4326815	LOC4326815	mRNA	-0.529445	0.000450065	00531///Glycosaminoglycan degradation+++04142///Lysosome+++01100///Metabolic pathways	H00130///Mucopolysaccharidosis type III (MPS3)+++H00527///Retinitis pigmentosa (RP)+++H00421///Mucopolysaccharidosis (MPS)	M00078///Heparan sulfate degradation	R07815///acetyl-CoA:heparan-alpha-D-glucosaminide N-acetyltransferase Acetyl-CoA + G13037 <=> CoA + G13038	GO:0016021///integral component of membrane			LOC_Os01g70550
4338255	LOC4338255	mRNA	-0.820842	3.39808e-05					GO:0016021///integral component of membrane+++GO:0016020///membrane+++GO:0005886///plasma membrane+++GO:0005783///endoplasmic reticulum+++GO:0005789///endoplasmic reticulum membrane	GO:0008289///lipid binding	GO:0007338///single fertilization	LOC_Os05g18730
4346160	LOC4346160	mRNA	-0.370422	4.26957e-13								LOC_Os08g42420
9269561	LOC9269561	mRNA	-0.499012	1.41271e-14	00600///Sphingolipid metabolism+++01100///Metabolic pathways+++04071///Sphingolipid signaling pathway+++04072///Phospholipase D signaling pathway+++04371///Apelin signaling pathway+++04020///Calcium signaling pathway+++04370///VEGF signaling pathway+++04666///Fc gamma R-mediated phagocytosis		M00100///Sphingosine degradation	R02976///ATP:sphinganine 1-phosphotransferase ATP + Sphinganine <=> ADP + Sphinganine 1-phosphate+++R01926///ATP:sphingosine 1-phosphotransferase; sphingosine Sphingosine + ATP <=> Sphingosine 1-phosphate + ADP	GO:0005773///vacuole	GO:0004190///aspartic-type endopeptidase activity+++GO:0016491///oxidoreductase activity+++GO:0010283///pinoresinol reductase activity	GO:0006508///proteolysis+++GO:0030163///protein catabolic process+++GO:0006629///lipid metabolic process+++GO:0009807///lignan biosynthetic process	LOC_Os12g16280
4343437	LOC4343437	mRNA	-0.426724	0.000107936					GO:0016021///integral component of membrane+++GO:0016020///membrane		GO:0007165///signal transduction
4338099	LOC4338099	mRNA	-0.397402	2.87559e-07								LOC_Os05g12140
4326469	LOC4326469	mRNA	-0.32715	1.44301e-13	03010///Ribosome		M00177///Ribosome, eukaryotes		GO:0005840///ribosome	GO:0003735///structural constituent of ribosome+++GO:0019843///rRNA binding	GO:0006412///translation	LOC_Os01g24690
4334324	LOC4334324	mRNA	-0.540903	1.37196e-06	04075///Plant hormone signal transduction				GO:0005634///nucleus	GO:0046983///protein dimerization activity+++GO:0003677///DNA binding	GO:0006351///transcription, DNA-templated+++GO:0090229///negative regulation of red or far-red light signaling pathway+++GO:0006355///regulation of transcription, DNA-templated+++GO:0080006///internode patterning+++GO:0045893///positive regulation of transcription, DNA-templated	LOC_Os03g56950
4341378	LOC4341378	mRNA	-0.677698	0.0318637					GO:0016021///integral component of membrane+++GO:0005886///plasma membrane	GO:0090440///abscisic acid transmembrane transporter activity+++GO:0015293///symporter activity	GO:0042128///nitrate assimilation+++GO:0009624///response to nematode+++GO:0080168///abscisic acid transport+++GO:0010119///regulation of stomatal movement	LOC_Os06g38294
4338354	LOC4338354	mRNA	-0.382946	4.05986e-12	04010///MAPK signaling pathway+++04612///Antigen processing and presentation+++04213///Longevity regulating pathway - multiple species+++04141///Protein processing in endoplasmic reticulum+++04144///Endocytosis+++04915///Estrogen signaling pathway+++03040///Spliceosome		M00355///Spliceosome, 35S U5-snRNP+++M00353///Spliceosome, Prp19/CDC5L complex		GO:0009570///chloroplast stroma	GO:0005524///ATP binding+++GO:0051082///unfolded protein binding	GO:0006457///protein folding	LOC_Os05g23740
4349121	LOC4349121	mRNA	-1.9868	1.78939e-15								LOC_Os10g37290
4332564	LOC4332564	mRNA	-0.941214	1.08072e-76					GO:0016020///membrane+++GO:0005794///Golgi apparatus+++GO:0005768///endosome+++GO:0016021///integral component of membrane+++GO:0005802///trans-Golgi network+++GO:0000139///Golgi membrane	GO:0035252///UDP-xylosyltransferase activity+++GO:0016757///transferase activity, transferring glycosyl groups+++GO:0033843///xyloglucan 6-xylosyltransferase activity+++GO:0016740///transferase activity	GO:0048767///root hair elongation+++GO:0009969///xyloglucan biosynthetic process	LOC_Os03g18820
4351546	LOC4351546	mRNA	-0.601272	0.000125549						GO:0003676///nucleic acid binding+++GO:0003964///RNA-directed DNA polymerase activity+++GO:0003700///DNA-binding transcription factor activity		LOC_Os12g06010
4330275	LOC4330275	mRNA	-1.88194	6.47394e-33
4329944	LOC4329944	mRNA	-0.494081	2.44856e-20								LOC_Os02g39630
4332215	LOC4332215	mRNA	-2.89052	0	04144///Endocytosis	H00266///Hereditary spastic paraplegia (SPG)						LOC_Os03g13840
9272230	LOC9272230	mRNA	-0.70425	0.0427467								LOC_Os05g49080
4344664	LOC4344664	mRNA	-0.615415	4.95913e-28					GO:0005634///nucleus	GO:0008270///zinc ion binding+++GO:0000976///transcription regulatory region sequence-specific DNA binding+++GO:0003700///DNA-binding transcription factor activity	GO:0048527///lateral root development+++GO:0009753///response to jasmonic acid+++GO:0010252///auxin homeostasis+++GO:0000122///negative regulation of transcription by RNA polymerase II+++GO:0030307///positive regulation of cell growth+++GO:0010150///leaf senescence+++GO:0009646///response to absence of light+++GO:0048366///leaf development+++GO:0009733///response to auxin+++GO:0009723///response …	LOC_Os08g05510
4345949	LOC4345949	mRNA	-0.375121	1.9385e-05					GO:0031011///Ino80 complex			LOC_Os08g39120
4335974	LOC4335974	mRNA	-0.312504	0.0482956						GO:0033707///3''-deamino-3''-oxonicotianamine reductase activity	GO:0034224///cellular response to zinc ion starvation+++GO:1990641///response to iron ion starvation+++GO:0019290///siderophore biosynthetic process	LOC_Os04g37470
4329733	LOC4329733	mRNA	-1.16701	1.62962e-97	01100///Metabolic pathways+++01110///Biosynthesis of secondary metabolites+++00790///Folate biosynthesis+++00740///Riboflavin metabolism		M00125///Riboflavin biosynthesis, GTP => riboflavin/FMN/FAD+++M00840///Tetrahydrofolate biosynthesis, mediated by ribA and trpF, GTP => THF	R00425///GTP 7,8-8,9-dihydrolase (diphosphate-forming) GTP + 3 H2O <=> Formate + 2,5-Diamino-6-(5-phospho-D-ribosylamino)pyrimidin-4(3H)-one + Diphosphate+++R07281///D-ribulose 5-phosphate formate-lyase (L-3,4-dihydroxybutan-2-one 4-phosphate-forming) D-Ribulose 5-phosphate <=> L-3,4-Dihydroxybutan-2-one 4-phosphate + Formate	GO:0009536///plastid+++GO:0009507///chloroplast	GO:0016829///lyase activity+++GO:0046872///metal ion binding+++GO:0003935///GTP cyclohydrolase II activity+++GO:0016787///hydrolase activity+++GO:0008686///3,4-dihydroxy-2-butanone-4-phosphate synthase activity+++GO:0005525///GTP binding+++GO:0000166///nucleotide binding+++GO:0003824///catalytic activity	GO:0008152///metabolic process+++GO:0009231///riboflavin biosynthetic process	LOC_Os02g36340
4331332	LOC4331332	mRNA	-1.39165	3.08027e-186					GO:0005634///nucleus	GO:0005515///protein binding+++GO:0004860///protein kinase inhibitor activity+++GO:0004861///cyclin-dependent protein serine/threonine kinase inhibitor activity	GO:0071901///negative regulation of protein serine/threonine kinase activity+++GO:0007049///cell cycle+++GO:0045736///negative regulation of cyclin-dependent protein serine/threonine kinase activity	LOC_Os03g01740
4341670	LOC4341670	mRNA	-0.43706	1.39532e-13								LOC_Os06g43940
4330203	LOC4330203	mRNA	-1.40861	8.65303e-10					GO:0005634///nucleus	GO:0003677///DNA binding+++GO:0003700///DNA-binding transcription factor activity	GO:0006351///transcription, DNA-templated+++GO:0009873///ethylene-activated signaling pathway+++GO:0009834///plant-type secondary cell wall biogenesis	LOC_Os02g43970
4350806	LOC4350806	mRNA	-0.506476	3.74884e-09								LOC_Os11g37690
4348673	LOC4348673	mRNA	-1.16168	6.5302e-12	04341///Hedgehog signaling pathway - fly+++04340///Hedgehog signaling pathway		M00384///Cul3-SPOP complex
4327594	LOC4327594	mRNA	-0.304392	1.85499e-09	03015///mRNA surveillance pathway					GO:0046872///metal ion binding+++GO:0005096///GTPase activator activity
4334586	LOC4334586	mRNA	-0.568095	2.45075e-08					GO:0005737///cytoplasm+++GO:0005783///endoplasmic reticulum+++GO:0005634///nucleus	GO:0046914///transition metal ion binding+++GO:0046872///metal ion binding	GO:0009908///flower development+++GO:0010015///root morphogenesis+++GO:0030001///metal ion transport+++GO:0055078///sodium ion homeostasis+++GO:0010233///phloem transport+++GO:0046916///cellular transition metal ion homeostasis
4347669	LOC4347669	mRNA	-0.813676	5.85396e-15								LOC_Os09g36160
4326668	LOC4326668	mRNA	-0.434935	1.33498e-20					GO:0005737///cytoplasm+++GO:0005634///nucleus	GO:0000166///nucleotide binding+++GO:0016301///kinase activity+++GO:0005524///ATP binding+++GO:0016740///transferase activity+++GO:0004674///protein serine/threonine kinase activity+++GO:0004707///MAP kinase activity+++GO:0004672///protein kinase activity	GO:0010468///regulation of gene expression+++GO:0016310///phosphorylation+++GO:0006468///protein phosphorylation+++GO:0000165///MAPK cascade+++GO:0035556///intracellular signal transduction	LOC_Os01g43910
4341361	LOC4341361	mRNA	-0.366679	9.78146e-06					GO:0005737///cytoplasm	GO:0030794///(S)-coclaurine-N-methyltransferase activity	GO:0008610///lipid biosynthetic process	LOC_Os06g37610
4330148	LOC4330148	mRNA	-0.614913	1.38538e-07
4326349	LOC4326349	mRNA	-1.60403	4.41953e-05								LOC_Os01g39000
4346606	LOC4346606	mRNA	-0.349366	2.34964e-08					GO:0009330///DNA topoisomerase complex (ATP-hydrolyzing)+++GO:0005634///nucleus+++GO:0005829///cytosol	GO:0005515///protein binding+++GO:0003677///DNA binding+++GO:0042803///protein homodimerization activity+++GO:0003916///DNA topoisomerase activity+++GO:0016853///isomerase activity+++GO:0000166///nucleotide binding+++GO:0061505///DNA topoisomerase II activity+++GO:0005524///ATP binding+++GO:0003918///DNA topoisomerase type II (ATP-hydrolyzing) activity	GO:0006265///DNA topological change	LOC_Os09g10770
4349917	LOC4349917	mRNA	-0.445907	1.72284e-13					GO:0005634///nucleus	GO:0046872///metal ion binding+++GO:0004842///ubiquitin-protein transferase activity	GO:0007093///mitotic cell cycle checkpoint+++GO:0006511///ubiquitin-dependent protein catabolic process	LOC_Os11g07450
4346786	LOC4346786	mRNA	-2.60806	0.00497111								LOC_Os09g17146
4328676	LOC4328676	mRNA	-3.13308	3.92215e-23	00062///Fatty acid elongation+++01110///Biosynthesis of secondary metabolites		M00415///Fatty acid biosynthesis, elongation, endoplasmic reticulum	R09419///acyl-CoA:malonyl-CoA C-acyltransferase (decarboxylating) Malonyl-CoA + Acyl-CoA <=> 3-Oxoacyl-CoA + CoA + CO2+++R10825///very-long-chain acyl-CoA:malonyl-CoA C-acyltransferase (decarboxylating) Very-long-chain acyl-CoA + Malonyl-CoA <=> Very-long-chain 3-oxoacyl-CoA + CO2 + CoA	GO:0016021///integral component of membrane	GO:0102338///3-oxo-lignoceronyl-CoA synthase activity+++GO:0102336///3-oxo-arachidoyl-CoA synthase activity+++GO:0102337///3-oxo-cerotoyl-CoA synthase activity+++GO:0102756///very-long-chain 3-ketoacyl-CoA synthase activity	GO:0006633///fatty acid biosynthetic process+++GO:0009416///response to light stimulus+++GO:0009409///response to cold	LOC_Os02g11070
4339633	LOC4339633	mRNA	-0.346219	4.10634e-06					GO:0005634///nucleus+++GO:0005737///cytoplasm	GO:0005524///ATP binding+++GO:0000166///nucleotide binding+++GO:0004672///protein kinase activity+++GO:0004707///MAP kinase activity+++GO:0016740///transferase activity+++GO:0016301///kinase activity+++GO:0004674///protein serine/threonine kinase activity	GO:0035556///intracellular signal transduction+++GO:0010468///regulation of gene expression+++GO:0016310///phosphorylation+++GO:0006468///protein phosphorylation+++GO:0000165///MAPK cascade	LOC_Os05g49140
4326931	LOC4326931	mRNA	-0.342826	0.0400907					GO:0005886///plasma membrane+++GO:0000139///Golgi membrane		GO:0015031///protein transport	LOC_Os01g50616
4352232	LOC4352232	mRNA	-0.444587	6.24506e-07					GO:0005737///cytoplasm+++GO:0016272///prefoldin complex	GO:0051082///unfolded protein binding+++GO:0044183///protein binding involved in protein folding	GO:0006457///protein folding	LOC_Os12g30060
4349481	LOC4349481	mRNA	-0.965077	7.94087e-14								LOC_Os10g42410
4342364	LOC4342364	mRNA	-0.329916	1.75326e-09	01100///Metabolic pathways+++00520///Amino sugar and nucleotide sugar metabolism			R01473///UDP-L-arabinose 4-epimerase UDP-L-arabinose <=> UDP-D-xylose	GO:0005794///Golgi apparatus+++GO:0016021///integral component of membrane+++GO:0032580///Golgi cisterna membrane+++GO:0016020///membrane	GO:0003978///UDP-glucose 4-epimerase activity+++GO:0016853///isomerase activity+++GO:0050373///UDP-arabinose 4-epimerase activity	GO:0006012///galactose metabolic process+++GO:0045227///capsule polysaccharide biosynthetic process+++GO:0033358///UDP-L-arabinose biosynthetic process+++GO:0005975///carbohydrate metabolic process	LOC_Os07g04690
4334792	LOC4334792	mRNA	-0.439546	0.0291696					GO:0016021///integral component of membrane+++GO:0005789///endoplasmic reticulum membrane	GO:0005506///iron ion binding+++GO:0004497///monooxygenase activity+++GO:0016705///oxidoreductase activity, acting on paired donors, with incorporation or reduction of molecular oxygen+++GO:0020037///heme binding	GO:0010132///dhurrin biosynthetic process	LOC_Os03g63310
4349849	LOC4349849	mRNA	-0.544147	1.89363e-10	04016///MAPK signaling pathway - plant				GO:0005634///nucleus+++GO:0005829///cytosol	GO:0003682///chromatin binding+++GO:0043621///protein self-association+++GO:0043565///sequence-specific DNA binding+++GO:0003676///nucleic acid binding+++GO:0051019///mitogen-activated protein kinase binding+++GO:0003700///DNA-binding transcription factor activity	GO:0045596///negative regulation of cell differentiation+++GO:0006952///defense response+++GO:0007231///osmosensory signaling pathway+++GO:0009970///cellular response to sulfate starvation+++GO:0008272///sulfate transport+++GO:0051170///import into nucleus+++GO:0009652///thigmotropism+++GO:0006351///transcription, DNA-templated+++GO:0009294///DNA mediated transformation+++GO:0006970///response to…
4350132	LOC4350132	mRNA	-0.555896	2.01332e-11	04626///Plant-pathogen interaction				GO:0005886///plasma membrane	GO:0043531///ADP binding	GO:0007165///signal transduction+++GO:0006952///defense response	LOC_Os11g12330
4352843	LOC4352843	mRNA	-0.512206	1.28483e-08						GO:0046872///metal ion binding+++GO:0019135///deoxyhypusine monooxygenase activity	GO:0008612///peptidyl-lysine modification to peptidyl-hypusine	LOC_Os12g43100
4335177	LOC4335177	mRNA	-0.718126	0.0170874					GO:0016020///membrane+++GO:0016021///integral component of membrane	GO:0005524///ATP binding+++GO:0042626///ATPase activity, coupled to transmembrane movement of substances+++GO:0000166///nucleotide binding+++GO:0016887///ATPase activity	GO:0055085///transmembrane transport	LOC_Os04g13220
4336755	LOC4336755	mRNA	-0.399398	4.90874e-08					GO:0005739///mitochondrion+++GO:0005743///mitochondrial inner membrane+++GO:0009941///chloroplast envelope+++GO:0009507///chloroplast+++GO:0016021///integral component of membrane	GO:0008381///mechanosensitive ion channel activity	GO:0006811///ion transport+++GO:0034599///cellular response to oxidative stress	LOC_Os04g48940
4351306	LOC4351306	mRNA	-0.423893	0.000679004								LOC_Os12g02150
4325939	LOC4325939	mRNA	-0.997716	0.00469799					GO:0005634///nucleus	GO:0003677///DNA binding+++GO:0044212///transcription regulatory region DNA binding+++GO:0003700///DNA-binding transcription factor activity	GO:0006355///regulation of transcription, DNA-templated+++GO:0048573///photoperiodism, flowering+++GO:0009908///flower development	LOC_Os01g51610
107277406	LOC107277406	mRNA	-0.723024	0.000613017					GO:0016021///integral component of membrane
4342612	LOC4342612	mRNA	-0.319752	0.000283868								LOC_Os07g09140
4343653	LOC4343653	mRNA	-0.322325	0.0205786						GO:0008270///zinc ion binding+++GO:0046872///metal ion binding+++GO:0003676///nucleic acid binding		LOC_Os07g38240
4345367	LOC4345367	mRNA	-0.383649	5.30002e-07	00564///Glycerophospholipid metabolism+++01110///Biosynthesis of secondary metabolites+++00561///Glycerolipid metabolism			R02239///1,2-diacyl-sn-glycerol 3-phosphate phosphohydrolase Phosphatidate + H2O <=> 1,2-Diacyl-sn-glycerol + Orthophosphate	GO:0005886///plasma membrane+++GO:0005887///integral component of plasma membrane	GO:0008195///phosphatidate phosphatase activity+++GO:0003993///acid phosphatase activity		LOC_Os08g27040
4327642	LOC4327642	mRNA	-0.304816	0.032047					GO:0016021///integral component of membrane			LOC_Os01g07700
4337736	LOC4337736	mRNA	-0.825643	0.0315688	04211///Longevity regulating pathway+++04714///Thermogenesis+++04530///Tight junction+++04910///Insulin signaling pathway+++04150///mTOR signaling pathway+++04140///Autophagy - animal+++04213///Longevity regulating pathway - multiple species+++04921///Oxytocin signaling pathway+++04151///PI3K-Akt signaling pathway+++04068///FoxO signaling pathway+++04371///Apelin signaling pathway+++04920///Adipo…				GO:0005737///cytoplasm+++GO:0005634///nucleus	GO:0016740///transferase activity+++GO:0004674///protein serine/threonine kinase activity+++GO:0005524///ATP binding+++GO:0004672///protein kinase activity+++GO:0000166///nucleotide binding+++GO:0016301///kinase activity	GO:0007165///signal transduction+++GO:0035556///intracellular signal transduction+++GO:0006468///protein phosphorylation+++GO:0016310///phosphorylation	LOC_Os05g04550
9269892	LOC9269892	mRNA	-0.52942	0.000376434								LOC_Os05g02564
4324401	LOC4324401	mRNA	-0.458823	3.83413e-07	01100///Metabolic pathways+++00260///Glycine, serine and threonine metabolism+++01200///Carbon metabolism+++01130///Biosynthesis of antibiotics+++00630///Glyoxylate and dicarboxylate metabolism+++00561///Glycerolipid metabolism+++01110///Biosynthesis of secondary metabolites		M00532///Photorespiration	R01514///ATP:(R)-glycerate 3-phosphotransferase ATP + D-Glycerate <=> ADP + 3-Phospho-D-glycerate	GO:0005737///cytoplasm+++GO:0009507///chloroplast+++GO:0005829///cytosol+++GO:0009941///chloroplast envelope+++GO:0009570///chloroplast stroma	GO:0005524///ATP binding+++GO:0008887///glycerate kinase activity+++GO:0004849///uridine kinase activity	GO:0009854///oxidative photosynthetic carbon pathway+++GO:0006206///pyrimidine nucleobase metabolic process+++GO:0043097///pyrimidine nucleoside salvage+++GO:0009853///photorespiration	LOC_Os01g48990
4331099	LOC4331099	mRNA	-0.38238	0.0297722					GO:0005634///nucleus	GO:0003677///DNA binding	GO:0009416///response to light stimulus+++GO:0007275///multicellular organism development+++GO:0009299///mRNA transcription+++GO:0090698///post-embryonic plant morphogenesis
4337457	LOC4337457	mRNA	-1.9995	1.50673e-96	03018///RNA degradation				GO:0030015///CCR4-NOT core complex+++GO:0005634///nucleus+++GO:0000932///P-body	GO:0046872///metal ion binding+++GO:0004535///poly(A)-specific ribonuclease activity+++GO:0003723///RNA binding+++GO:0008408///3'-5' exonuclease activity	GO:0042742///defense response to bacterium+++GO:0017148///negative regulation of translation+++GO:0000289///nuclear-transcribed mRNA poly(A) tail shortening+++GO:0043928///exonucleolytic nuclear-transcribed mRNA catabolic process involved in deadenylation-dependent decay+++GO:0006355///regulation of transcription, DNA-templated+++GO:0006351///transcription, DNA-templated
4325013	LOC4325013	mRNA	-0.736401	3.15494e-16						GO:0052689///carboxylic ester hydrolase activity+++GO:0016787///hydrolase activity	GO:0009056///catabolic process	LOC_Os01g67600
4341914	LOC4341914	mRNA	-0.34437	8.62057e-06								LOC_Os06g47770
4339142	LOC4339142	mRNA	-1.02187	2.06638e-06					GO:0016021///integral component of membrane	GO:0004674///protein serine/threonine kinase activity+++GO:0005524///ATP binding		LOC_Os05g40770
4344572	LOC4344572	mRNA	-0.304412	5.92979e-09	03040///Spliceosome				GO:0005681///spliceosomal complex	GO:0046872///metal ion binding	GO:0008380///RNA splicing+++GO:0006397///mRNA processing	LOC_Os08g03390
4337789	LOC4337789	mRNA	-0.423723	0.00314625	00500///Starch and sucrose metabolism			R06211///Sucrose 6'-phosphate + H2O <=> Sucrose + Orthophosphate+++R00805///sucrose-6F-phosphate phosphohydrolase Sucrose 6'-phosphate + H2O <=> Sucrose + Orthophosphate		GO:0016757///transferase activity, transferring glycosyl groups+++GO:0000287///magnesium ion binding+++GO:0050307///sucrose-phosphate phosphatase activity	GO:0005986///sucrose biosynthetic process
4352636	LOC4352636	mRNA	-0.482357	5.65081e-05
4349464	LOC4349464	mRNA	-0.473949	2.48722e-09					GO:0005886///plasma membrane		GO:0009416///response to light stimulus	LOC_Os10g42190
4324783	LOC4324783	mRNA	-2.10385	1.86137e-34					GO:0005829///cytosol+++GO:0005634///nucleus	GO:0003677///DNA binding	GO:0006351///transcription, DNA-templated+++GO:0006355///regulation of transcription, DNA-templated	LOC_Os01g64360
4332372	LOC4332372	mRNA	-0.660665	7.54382e-46	00561///Glycerolipid metabolism+++01100///Metabolic pathways			R04469///UDP-alpha-D-galactose:1,2-diacyl-3-beta-D-galactosyl-sn-glycerol 6-alpha-D-galactosyltransferase 1,2-Diacyl-3-beta-D-galactosyl-sn-glycerol + UDP-alpha-D-galactose <=> Digalactosyl-diacylglycerol + UDP	GO:0009707///chloroplast outer membrane+++GO:0043661///peribacteroid membrane	GO:0046481///digalactosyldiacylglycerol synthase activity	GO:0009877///nodulation	LOC_Os03g16140
4332593	LOC4332593	mRNA	-0.362761	5.99589e-05	00010///Glycolysis / Gluconeogenesis+++01100///Metabolic pathways+++00620///Pyruvate metabolism+++00630///Glyoxylate and dicarboxylate metabolism			R00235///Acetate:CoA ligase (AMP-forming) ATP + Acetate + CoA <=> AMP + Diphosphate + Acetyl-CoA+++R00236///acetyl adenylate:CoA acetyltransferase Acetyl adenylate + CoA <=> AMP + Acetyl-CoA+++R00316///ATP:acetate adenylyltransferase ATP + Acetate <=> Diphosphate + Acetyl adenylate	GO:0005777///peroxisome	GO:0047760///butyrate-CoA ligase activity+++GO:0003987///acetate-CoA ligase activity	GO:0006083///acetate metabolic process+++GO:0019605///butyrate metabolic process+++GO:0006097///glyoxylate cycle	LOC_Os03g19250
112936009	LOC112936009	mRNA	-0.376251	0.0261541					GO:0043240///Fanconi anaemia nuclear complex	GO:0004842///ubiquitin-protein transferase activity	GO:0006281///DNA repair	LOC_Os03g51680
4330940	LOC4330940	mRNA	-0.37721	1.07187e-13	01110///Biosynthesis of secondary metabolites+++01100///Metabolic pathways+++01130///Biosynthesis of antibiotics+++00310///Lysine degradation	H01242///Saccharopinuria+++H00188///Hyperlysinemia	M00032///Lysine degradation, lysine => saccharopine => acetoacetyl-CoA	R02313///N6-(L-1,3-Dicarboxypropyl)-L-lysine:NAD+ oxidoreductase; N6-(L-1,3-Dicarboxypropyl)-L-lysine:NAD+ N6-(L-1,3-Dicarboxypropyl)-L-lysine + NAD+ + H2O <=> L-Glutamate + L-2-Aminoadipate 6-semialdehyde + NADH + H++++R00716///N6-(L-1,3-Dicarboxypropyl)-L-lysine:NADP+ oxidoreductase (L-lysine-forming) N6-(L-1,3-Dicarboxypropyl)-L-lysine + NADP+ + H2O <=> L-Lysine + 2-Oxoglutarate + NADPH + H+	GO:0016020///membrane+++GO:0016021///integral component of membrane	GO:0016491///oxidoreductase activity	GO:0055114///oxidation-reduction process	LOC_Os02g54254
107278978	LOC107278978	mRNA	-0.353742	1.94315e-15
4346082	LOC4346082	mRNA	-0.378427	1.7199e-06	03060///Protein export				GO:0005622///intracellular+++GO:0016021///integral component of membrane	GO:0005525///GTP binding		LOC_Os08g41250
4342842	LOC4342842	mRNA	-0.613742	2.5183e-08					GO:0016021///integral component of membrane			LOC_Os07g14650
4348080	LOC4348080	mRNA	-0.531892	8.53353e-12	00511///Other glycan degradation				GO:0000326///protein storage vacuole+++GO:0005773///vacuole	GO:0046872///metal ion binding+++GO:0030246///carbohydrate binding+++GO:0004559///alpha-mannosidase activity	GO:0006517///protein deglycosylation+++GO:0006013///mannose metabolic process	LOC_Os10g05069
9270871	LOC9270871	mRNA	-0.544876	6.65422e-09	03013///RNA transport					GO:0003924///GTPase activity+++GO:0005525///GTP binding
4348795	LOC4348795	mRNA	-0.440377	0.0380419		H00792///Warburg micro syndrome			GO:0005794///Golgi apparatus+++GO:0005886///plasma membrane+++GO:0005777///peroxisome	GO:0003924///GTPase activity+++GO:0030742///GTP-dependent protein binding+++GO:0005525///GTP binding+++GO:0080115///myosin XI tail binding	GO:0015031///protein transport	LOC_Os10g31830
107277395	LOC107277395	mRNA	-1.54703	0.00702908					GO:0016021///integral component of membrane
4342079	LOC4342079	mRNA	-0.825638	1.88114e-46	04144///Endocytosis	H00266///Hereditary spastic paraplegia (SPG)			GO:0009507///chloroplast+++GO:0005886///plasma membrane		GO:0009644///response to high light intensity+++GO:0009409///response to cold+++GO:0009737///response to abscisic acid+++GO:0009414///response to water deprivation+++GO:0009651///response to salt stress+++GO:0007623///circadian rhythm	LOC_Os06g50330
4332047	LOC4332047	mRNA	-0.626921	7.24339e-12								LOC_Os03g11490
4348587	LOC4348587	mRNA	-0.387027	6.8367e-06		H00891///Combined oxidative phosphorylation deficiency (COXPD)
4339974	LOC4339974	mRNA	-2.79897	2.94185e-29					GO:0005634///nucleus	GO:0003677///DNA binding+++GO:0003700///DNA-binding transcription factor activity	GO:0006355///regulation of transcription, DNA-templated	LOC_Os06g03670
4338181	LOC4338181	mRNA	-0.307513	2.01791e-05					GO:0005634///nucleus+++GO:0005737///cytoplasm	GO:0008270///zinc ion binding+++GO:0061630///ubiquitin protein ligase activity	GO:0006511///ubiquitin-dependent protein catabolic process+++GO:0007275///multicellular organism development+++GO:0016567///protein ubiquitination	LOC_Os05g14860
4331350	LOC4331350	mRNA	-1.37297	9.31776e-39					GO:0005634///nucleus	GO:0003677///DNA binding	GO:0006355///regulation of transcription, DNA-templated+++GO:0006351///transcription, DNA-templated	LOC_Os03g01940
4325443	LOC4325443	mRNA	-0.321557	3.34152e-08								LOC_Os01g27740
4347614	LOC4347614	mRNA	-0.663481	1.83088e-52	00900///Terpenoid backbone biosynthesis+++00650///Butanoate metabolism+++01100///Metabolic pathways+++01130///Biosynthesis of antibiotics+++00072///Synthesis and degradation of ketone bodies+++01110///Biosynthesis of secondary metabolites+++00280///Valine, leucine and isoleucine degradation	H01123///HMG-CoA synthase (HMGCS) deficiency	M00095///C5 isoprenoid biosynthesis, mevalonate pathway+++M00849///C5 isoprenoid biosynthesis, mevalonate pathway, archaea+++M00088///Ketone body biosynthesis, acetyl-CoA => acetoacetate/3-hydroxybutyrate/acetone	R01978///acetyl-CoA:acetoacetyl-CoA C-acetyltransferase (thioester-hydrolysing, carboxymethyl-forming) (S)-3-Hydroxy-3-methylglutaryl-CoA + CoA <=> Acetyl-CoA + H2O + Acetoacetyl-CoA	GO:0009506///plasmodesma+++GO:0005829///cytosol	GO:0004421///hydroxymethylglutaryl-CoA synthase activity	GO:0019287///isopentenyl diphosphate biosynthetic process, mevalonate pathway+++GO:0016126///sterol biosynthetic process	LOC_Os09g34960
4336715	LOC4336715	mRNA	-0.369046	8.20917e-05						GO:0061630///ubiquitin protein ligase activity+++GO:0004842///ubiquitin-protein transferase activity+++GO:0031624///ubiquitin conjugating enzyme binding+++GO:0046872///metal ion binding	GO:0008285///negative regulation of cell proliferation+++GO:0016567///protein ubiquitination+++GO:0048437///floral organ development+++GO:0046621///negative regulation of organ growth+++GO:1900057///positive regulation of leaf senescence+++GO:0051865///protein autoubiquitination+++GO:0043161///proteasome-mediated ubiquitin-dependent protein catabolic process	LOC_Os04g48260
4337750	LOC4337750	mRNA	-1.97089	2.95564e-07					GO:0016020///membrane+++GO:0016021///integral component of membrane
4327467	LOC4327467	mRNA	-0.327632	3.02801e-07								LOC_Os01g62790
4331613	LOC4331613	mRNA	-0.398894	4.51753e-14					GO:0009705///plant-type vacuole membrane		GO:0009630///gravitropism+++GO:0009660///amyloplast organization+++GO:0009959///negative gravitropism
4335927	LOC4335927	mRNA	-0.343938	1.90373e-11								LOC_Os04g35910
4346489	LOC4346489	mRNA	-0.306095	0.0393626							GO:0048193///Golgi vesicle transport+++GO:0043087///regulation of GTPase activity	LOC_Os09g06970
4333361	LOC4333361	mRNA	-0.431848	2.35272e-05					GO:0016021///integral component of membrane	GO:0050660///flavin adenine dinucleotide binding
4337461	LOC4337461	mRNA	-0.453741	6.53503e-09					GO:0016021///integral component of membrane			LOC_Os04g58850
4352538	LOC4352538	mRNA	-0.58555	0.0420359					GO:0009579///thylakoid+++GO:0031977///thylakoid lumen+++GO:0019898///extrinsic component of membrane+++GO:0009654///photosystem II oxygen evolving complex+++GO:0009535///chloroplast thylakoid membrane+++GO:0009543///chloroplast thylakoid lumen+++GO:0016020///membrane+++GO:0009507///chloroplast+++GO:0009570///chloroplast stroma	GO:0005509///calcium ion binding	GO:0048564///photosystem I assembly
4347174	LOC4347174	mRNA	-0.652163	0.000587337					GO:0009505///plant-type cell wall+++GO:0009506///plasmodesma+++GO:0005576///extracellular region+++GO:0005794///Golgi apparatus+++GO:0005618///cell wall	GO:0004252///serine-type endopeptidase activity		LOC_Os09g26920
4336983	LOC4336983	mRNA	-0.904778	9.27654e-33	00250///Alanine, aspartate and glutamate metabolism+++01120///Microbial metabolism in diverse environments+++01100///Metabolic pathways+++00650///Butanoate metabolism		M00027///GABA (gamma-Aminobutyrate) shunt	R10178///4-aminobutanoate:pyruvate aminotransferase 4-Aminobutanoate + Pyruvate <=> Succinate semialdehyde + L-Alanine	GO:0005739///mitochondrion	GO:0003824///catalytic activity+++GO:0008483///transaminase activity+++GO:0034387///4-aminobutyrate:pyruvate transaminase activity+++GO:0004015///adenosylmethionine-8-amino-7-oxononanoate transaminase activity+++GO:0030170///pyridoxal phosphate binding+++GO:0102351///gamma-aminobutyrate transaminase (glyoxylate dependent) activity+++GO:0016740///transferase activity	GO:0009102///biotin biosynthetic process	LOC_Os04g52450
4349238	LOC4349238	mRNA	-1.06925	0.00519341						GO:0046872///metal ion binding+++GO:0045486///naringenin 3-dioxygenase activity+++GO:0031418///L-ascorbic acid binding	GO:0009813///flavonoid biosynthetic process	LOC_Os10g39140
4342821	LOC4342821	mRNA	-0.413347	0.00478375					GO:0016021///integral component of membrane+++GO:0016020///membrane			LOC_Os07g14090
4345973	LOC4345973	mRNA	-2.31445	5.67634e-249						GO:0008270///zinc ion binding+++GO:0046872///metal ion binding+++GO:0003677///DNA binding		LOC_Os08g39450
4339451	LOC4339451	mRNA	-1.08515	0.00106625					GO:0005634///nucleus	GO:0003700///DNA-binding transcription factor activity+++GO:1990837///sequence-specific double-stranded DNA binding	GO:0045893///positive regulation of transcription, DNA-templated+++GO:0010228///vegetative to reproductive phase transition of meristem+++GO:0006351///transcription, DNA-templated	LOC_Os05g46020
4346379	LOC4346379	mRNA	-0.873826	5.44742e-18					GO:0005634///nucleus	GO:0001135///RNA polymerase II transcription regulator recruiting activity+++GO:0000981///DNA-binding transcription factor activity, RNA polymerase II-specific+++GO:0003700///DNA-binding transcription factor activity+++GO:0044212///transcription regulatory region DNA binding+++GO:0043565///sequence-specific DNA binding	GO:0010200///response to chitin+++GO:0009733///response to auxin+++GO:0006351///transcription, DNA-templated+++GO:2000022///regulation of jasmonic acid mediated signaling pathway+++GO:0009737///response to abscisic acid+++GO:0009738///abscisic acid-activated signaling pathway+++GO:0009414///response to water deprivation+++GO:0009751///response to salicylic acid+++GO:0009753///response to jasmonic…	LOC_Os09g01960
4344063	LOC4344063	mRNA	-0.442718	0.000488493					GO:0005634///nucleus	GO:0003677///DNA binding+++GO:0043565///sequence-specific DNA binding+++GO:0000978///RNA polymerase II proximal promoter sequence-specific DNA binding+++GO:0042802///identical protein binding+++GO:0003700///DNA-binding transcription factor activity	GO:0034605///cellular response to heat+++GO:0006355///regulation of transcription, DNA-templated+++GO:0061408///positive regulation of transcription from RNA polymerase II promoter in response to heat stress	LOC_Os07g44690
4344266	LOC4344266	mRNA	-3.49242	1.73134e-100					GO:0005634///nucleus	GO:0003677///DNA binding+++GO:0003700///DNA-binding transcription factor activity	GO:0009873///ethylene-activated signaling pathway+++GO:0001666///response to hypoxia+++GO:0010468///regulation of gene expression+++GO:0006351///transcription, DNA-templated	LOC_Os07g47790
4352659	LOC4352659	mRNA	-0.310454	4.99021e-06					GO:0005886///plasma membrane	GO:0043531///ADP binding+++GO:0005524///ATP binding+++GO:0016301///kinase activity	GO:0051707///response to other organism+++GO:0009414///response to water deprivation+++GO:0080167///response to karrikin+++GO:0042742///defense response to bacterium+++GO:0009626///plant-type hypersensitive response+++GO:0007165///signal transduction	LOC_Os12g39620
4331993	LOC4331993	mRNA	-0.319816	5.03491e-14					GO:0071944///cell periphery		GO:0009958///positive gravitropism+++GO:0016567///protein ubiquitination	LOC_Os03g10800
4334114	LOC4334114	mRNA	-0.43115	2.16846e-26	00460///Cyanoamino acid metabolism+++00940///Phenylpropanoid biosynthesis+++01100///Metabolic pathways+++00500///Starch and sucrose metabolism+++01110///Biosynthesis of secondary metabolites			R03527///D-Glucoside glucohydrolase beta-D-Glucoside + H2O <=> D-Glucose + ROH+++R00026///cellobiose glucohydrolase Cellobiose + H2O <=> 2 beta-D-Glucose+++R10040///beta-D-glucoside glucohydrolase Linamarin + H2O <=> Acetone cyanohydrin + beta-D-Glucose+++R02985///amygdalin beta-glucosidase Prunasin + D-Glucose <=> Amygdalin + H2O+++R04949///Cyanoglycoside glucohydrolase Cyanoglycoside + H2O <=> …		GO:0004553///hydrolase activity, hydrolyzing O-glycosyl compounds	GO:0005975///carbohydrate metabolic process	LOC_Os03g53800
9266451	LOC9266451	mRNA	-0.436394	1.06086e-09					GO:0005737///cytoplasm+++GO:0005634///nucleus	GO:0009055///electron transfer activity+++GO:0046872///metal ion binding+++GO:0015035///protein disulfide oxidoreductase activity+++GO:0051537///2 iron, 2 sulfur cluster binding	GO:0045454///cell redox homeostasis
4334278	LOC4334278	mRNA	-0.375401	0.000920489					GO:0009535///chloroplast thylakoid membrane			LOC_Os03g56320
4327651	LOC4327651	mRNA	-3.41499	4.75589e-05					GO:0005634///nucleus	GO:0043565///sequence-specific DNA binding+++GO:0003700///DNA-binding transcription factor activity+++GO:0003677///DNA binding	GO:0006355///regulation of transcription, DNA-templated	LOC_Os01g40260
9269025	LOC9269025	mRNA	-0.938747	8.83607e-07
4340743	LOC4340743	mRNA	-0.705956	1.69065e-07					GO:0016020///membrane+++GO:0005886///plasma membrane+++GO:0016021///integral component of membrane	GO:0016740///transferase activity+++GO:0016301///kinase activity+++GO:0004674///protein serine/threonine kinase activity+++GO:0004675///transmembrane receptor protein serine/threonine kinase activity+++GO:0005524///ATP binding+++GO:0004672///protein kinase activity+++GO:0000166///nucleotide binding	GO:0006468///protein phosphorylation+++GO:0006952///defense response+++GO:0016310///phosphorylation+++GO:0007178///transmembrane receptor protein serine/threonine kinase signaling pathway	LOC_Os06g16330
4343558	LOC4343558	mRNA	-1.05796	7.74771e-06					GO:0005739///mitochondrion+++GO:0031305///integral component of mitochondrial inner membrane	GO:0050833///pyruvate transmembrane transporter activity	GO:0006850///mitochondrial pyruvate transmembrane transport	LOC_Os07g36800
4339561	LOC4339561	mRNA	-0.815001	1.09762e-21	01120///Microbial metabolism in diverse environments+++00250///Alanine, aspartate and glutamate metabolism+++01100///Metabolic pathways+++01230///Biosynthesis of amino acids+++01110///Biosynthesis of secondary metabolites+++01130///Biosynthesis of antibiotics+++00910///Nitrogen metabolism			R00114///L-Glutamate:NADP+ oxidoreductase (transaminating) 2 L-Glutamate + NADP+ <=> L-Glutamine + 2-Oxoglutarate + NADPH + H++++R00093///L-glutamate:NAD+ oxidoreductase (transaminating) 2 L-Glutamate + NAD+ <=> L-Glutamine + 2-Oxoglutarate + NADH + H++++R00248///L-Glutamate:NADP+ oxidoreductase (deaminating) L-Glutamate + NADP+ + H2O <=> 2-Oxoglutarate + Ammonia + NADPH + H+	GO:0005737///cytoplasm+++GO:0009507///chloroplast	GO:0005506///iron ion binding+++GO:0016040///glutamate synthase (NADH) activity+++GO:0050660///flavin adenine dinucleotide binding+++GO:0010181///FMN binding+++GO:0015930///glutamate synthase activity+++GO:0051538///3 iron, 4 sulfur cluster binding	GO:0097054///L-glutamate biosynthetic process+++GO:0006537///glutamate biosynthetic process+++GO:0019676///ammonia assimilation cycle	LOC_Os05g48200
4334380	LOC4334380	mRNA	-0.714674	2.77557e-25					GO:0016020///membrane+++GO:0005886///plasma membrane+++GO:0016021///integral component of membrane	GO:0008237///metallopeptidase activity+++GO:0046872///metal ion binding+++GO:0004180///carboxypeptidase activity+++GO:0016787///hydrolase activity+++GO:0008233///peptidase activity	GO:0007275///multicellular organism development+++GO:0040008///regulation of growth+++GO:0006508///proteolysis	LOC_Os03g57660
4335729	LOC4335729	mRNA	-1.08648	0.0169143					GO:0016021///integral component of membrane+++GO:0005886///plasma membrane+++GO:0016020///membrane	GO:0015079///potassium ion transmembrane transporter activity	GO:0006813///potassium ion transport+++GO:0071805///potassium ion transmembrane transport+++GO:0006811///ion transport	LOC_Os04g32920
9266295	LOC9266295	mRNA	-0.513138	2.74698e-27	04310///Wnt signaling pathway+++04115///p53 signaling pathway+++04120///Ubiquitin mediated proteolysis+++04013///MAPK signaling pathway - fly				GO:0005737///cytoplasm+++GO:0005634///nucleus	GO:0008270///zinc ion binding+++GO:0061630///ubiquitin protein ligase activity	GO:0007275///multicellular organism development+++GO:0006511///ubiquitin-dependent protein catabolic process+++GO:0080148///negative regulation of response to water deprivation	LOC_Os03g24040
4329321	LOC4329321	mRNA	-1.10429	2.6385e-225	00480///Glutathione metabolism+++01100///Metabolic pathways			R02743///gamma-L-glutamyl-L-cysteine gamma-glutamyl cyclotransferase (5-oxoproline-forming) gamma-L-Glutamyl-L-cysteine <=> 5-Oxoproline + L-Cysteine+++R03749///(5-L-glutamyl)-L-amino-acid gamma-glutamyl cyclotransferase (5-oxoproline-forming) (5-L-Glutamyl)-L-amino acid <=> 5-Oxoproline + L-Amino acid	GO:0005737///cytoplasm	GO:0003839///gamma-glutamylcyclotransferase activity	GO:0006751///glutathione catabolic process	LOC_Os02g26700
4324587	LOC4324587	mRNA	-0.473491	1.87581e-05					GO:0009507///chloroplast+++GO:0016021///integral component of membrane	GO:0005524///ATP binding+++GO:0042626///ATPase activity, coupled to transmembrane movement of substances		LOC_Os01g11946
4332663	LOC4332663	mRNA	-0.381115	7.89111e-11	04920///Adipocytokine signaling pathway+++04921///Oxytocin signaling pathway+++04530///Tight junction+++04714///Thermogenesis+++04371///Apelin signaling pathway+++04152///AMPK signaling pathway+++04068///FoxO signaling pathway+++04211///Longevity regulating pathway+++04213///Longevity regulating pathway - multiple species+++04710///Circadian rhythm+++04922///Glucagon signaling pathway+++04910///I…					GO:0016301///kinase activity	GO:0016310///phosphorylation	LOC_Os03g20340
4329539	LOC4329539	mRNA	-0.305917	2.70053e-06					GO:0005802///trans-Golgi network+++GO:0016021///integral component of membrane+++GO:0005768///endosome+++GO:0000139///Golgi membrane+++GO:0005794///Golgi apparatus+++GO:0016020///membrane	GO:0016740///transferase activity+++GO:0016757///transferase activity, transferring glycosyl groups	GO:0009969///xyloglucan biosynthetic process	LOC_Os02g32750
4332799	LOC4332799	mRNA	-0.665288	2.42875e-42								LOC_Os03g22270
4333094	LOC4333094	mRNA	-0.864864	3.02237e-35	04612///Antigen processing and presentation				GO:0016602///CCAAT-binding factor complex	GO:0003677///DNA binding+++GO:0003700///DNA-binding transcription factor activity	GO:0006355///regulation of transcription, DNA-templated	LOC_Os03g29760
4334213	LOC4334213	mRNA	-2.99462	8.81777e-122					GO:0005634///nucleus	GO:0046872///metal ion binding+++GO:0003677///DNA binding	GO:0006355///regulation of transcription, DNA-templated+++GO:0006351///transcription, DNA-templated	LOC_Os03g55540
4326548	LOC4326548	mRNA	-0.846293	3.03269e-05
4336486	LOC4336486	mRNA	-0.826222	1.33109e-09					GO:0005794///Golgi apparatus+++GO:0016021///integral component of membrane+++GO:0000139///Golgi membrane	GO:0047262///polygalacturonate 4-alpha-galacturonosyltransferase activity+++GO:0016757///transferase activity, transferring glycosyl groups	GO:0000271///polysaccharide biosynthetic process+++GO:0071555///cell wall organization+++GO:0045489///pectin biosynthetic process	LOC_Os04g44850
4324829	LOC4324829	mRNA	-1.79238	1.74964e-154						GO:0046872///metal ion binding+++GO:0020037///heme binding	GO:0019441///tryptophan catabolic process to kynurenine
4341179	LOC4341179	mRNA	-0.42562	8.267e-15								LOC_Os06g33320
9271431	LOC9271431	mRNA	-1.15214	0.0415514	04016///MAPK signaling pathway - plant				GO:0005886///plasma membrane+++GO:0016021///integral component of membrane	GO:0004675///transmembrane receptor protein serine/threonine kinase activity+++GO:0005102///signaling receptor binding+++GO:0005524///ATP binding	GO:0006952///defense response+++GO:0030154///cell differentiation+++GO:0006468///protein phosphorylation+++GO:0010262///somatic embryogenesis+++GO:0040008///regulation of growth+++GO:0009742///brassinosteroid mediated signaling pathway+++GO:0045089///positive regulation of innate immune response+++GO:0007166///cell surface receptor signaling pathway+++GO:1900150///regulation of defense response t…
4331832	LOC4331832	mRNA	-3.71493	6.21505e-10	04075///Plant hormone signal transduction				GO:0005634///nucleus	GO:0005515///protein binding	GO:0009611///response to wounding+++GO:0031347///regulation of defense response+++GO:2000022///regulation of jasmonic acid mediated signaling pathway	LOC_Os03g08310
9268583	LOC9268583	mRNA	-0.310911	0.00103201					GO:0016021///integral component of membrane			LOC_Os03g49464
4330969	LOC4330969	mRNA	-0.731781	2.89045e-18								LOC_Os02g54780
4336539	LOC4336539	mRNA	-0.991632	0.00252754						GO:0005524///ATP binding+++GO:0004672///protein kinase activity		LOC_Os04g45730
4345986	LOC4345986	mRNA	-1.01028	6.25172e-05	00904///Diterpenoid biosynthesis+++01110///Biosynthesis of secondary metabolites			R09866///ent-cassa-12,15-diene,NADPH:oxygen 11-oxidoreductase ent-Cassa-12,15-diene + Oxygen + NADPH + H+ <=> ent-11beta-Hydroxycassa-12,15-diene + NADP+ + H2O+++R11658///ent-sandaracopimaradien-3beta-ol,NADPH:oxygen oxidoreductase (oryzalexin D forming) ent-Sandaracopimaradien-3beta-ol + NADPH + H+ + Oxygen <=> Oryzalexin D + NADP+ + H2O	GO:0016020///membrane+++GO:0016021///integral component of membrane	GO:0005506///iron ion binding+++GO:0020037///heme binding+++GO:0004497///monooxygenase activity+++GO:0036202///ent-cassa-12,15-diene 11-hydroxylase activity	GO:0051502///diterpene phytoalexin biosynthetic process+++GO:0016102///diterpenoid biosynthetic process+++GO:0055114///oxidation-reduction process+++GO:0006952///defense response	LOC_Os08g39694
4332413	LOC4332413	mRNA	-1.38741	2.28342e-33	04144///Endocytosis+++04141///Protein processing in endoplasmic reticulum+++04612///Antigen processing and presentation+++04915///Estrogen signaling pathway+++03040///Spliceosome+++04213///Longevity regulating pathway - multiple species+++04010///MAPK signaling pathway		M00355///Spliceosome, 35S U5-snRNP+++M00353///Spliceosome, Prp19/CDC5L complex		GO:0005794///Golgi apparatus+++GO:0005739///mitochondrion+++GO:0005618///cell wall+++GO:0048046///apoplast+++GO:0005774///vacuolar membrane+++GO:0005886///plasma membrane+++GO:0005829///cytosol+++GO:0005634///nucleus	GO:0031625///ubiquitin protein ligase binding+++GO:0005524///ATP binding	GO:0009408///response to heat+++GO:0009266///response to temperature stimulus+++GO:0006355///regulation of transcription, DNA-templated+++GO:0046686///response to cadmium ion+++GO:0009615///response to virus+++GO:0006351///transcription, DNA-templated+++GO:0009644///response to high light intensity+++GO:0042542///response to hydrogen peroxide+++GO:0016567///protein ubiquitination+++GO:0009617///r…	LOC_Os03g16860
4331834	LOC4331834	mRNA	-2.37648	6.8254e-74	04075///Plant hormone signal transduction				GO:0005634///nucleus	GO:0005515///protein binding	GO:2000022///regulation of jasmonic acid mediated signaling pathway+++GO:0031347///regulation of defense response+++GO:0009611///response to wounding	LOC_Os03g08330
4349338	LOC4349338	mRNA	-0.416252	9.37839e-12						GO:0008289///lipid binding	GO:0006869///lipid transport	LOC_Os10g40590
4346450	LOC4346450	mRNA	-0.306718	3.56045e-10								LOC_Os09g04440
4334124	LOC4334124	mRNA	-2.71363	0.000241473								LOC_Os03g53930
4331271	LOC4331271	mRNA	-0.469483	0.0304737	00940///Phenylpropanoid biosynthesis+++01110///Biosynthesis of secondary metabolites+++01100///Metabolic pathways			R02596///Donor:hydrogen-peroxide oxidoreductase Coniferyl alcohol <=> Guaiacyl lignin+++R03919///Donor:hydrogen-peroxide oxidoreductase Sinapyl alcohol <=> Syringyl lignin+++R07443///donor:hydrogen-peroxide oxidoreductase 5-Hydroxyconiferyl alcohol <=> 5-Hydroxy-guaiacyl lignin+++R00602///methanol:hydrogen-peroxide oxidoreductase Methanol + Hydrogen peroxide <=> Formaldehyde + 2 H2O+++R04007///Do…	GO:0009506///plasmodesma+++GO:0009505///plant-type cell wall+++GO:0005576///extracellular region	GO:0004601///peroxidase activity+++GO:0046872///metal ion binding+++GO:0020037///heme binding	GO:0042744///hydrogen peroxide catabolic process+++GO:0006979///response to oxidative stress+++GO:0009664///plant-type cell wall organization	LOC_Os02g58720
4337342	LOC4337342	mRNA	-0.885057	0.0208148	04144///Endocytosis				GO:0009506///plasmodesma+++GO:0005737///cytoplasm+++GO:0016020///membrane+++GO:0043231///intracellular membrane-bounded organelle+++GO:0005886///plasma membrane+++GO:0010008///endosome membrane+++GO:0005768///endosome	GO:0016787///hydrolase activity+++GO:0005525///GTP binding+++GO:0005509///calcium ion binding	GO:0006897///endocytosis+++GO:0051260///protein homooligomerization+++GO:0042538///hyperosmotic salinity response+++GO:0032456///endocytic recycling	LOC_Os04g57350
4350542	LOC4350542	mRNA	-1.63968	0.0207269
4329351	LOC4329351	mRNA	-0.327227	7.84056e-07
4326760	LOC4326760	mRNA	-1.10628	3.97245e-20					GO:0005634///nucleus	GO:0003700///DNA-binding transcription factor activity+++GO:0044212///transcription regulatory region DNA binding+++GO:0043565///sequence-specific DNA binding	GO:0006351///transcription, DNA-templated+++GO:0009873///ethylene-activated signaling pathway+++GO:0016036///cellular response to phosphate starvation+++GO:0080169///cellular response to boron-containing substance deprivation+++GO:0045892///negative regulation of transcription, DNA-templated+++GO:0010200///response to chitin	LOC_Os01g14440
4336943	LOC4336943	mRNA	-0.606541	9.69148e-21								LOC_Os04g52050
4343074	LOC4343074	mRNA	-0.360695	0.000307047	04211///Longevity regulating pathway+++00310///Lysine degradation	H00907///Kleefstra syndrome		R03875///Protein lysine + S-Adenosyl-L-methionine <=> Protein N6-methyl-L-lysine + S-Adenosyl-L-homocysteine+++R04866///S-adenosyl-L-methionine:cytochrome-c-L-lysine N6-methyltransferase S-Adenosyl-L-methionine + Protein N6-methyl-L-lysine <=> S-Adenosyl-L-homocysteine + Protein N6,N6-dimethyl-L-lysine+++R03938///S-Adenosyl-L-methionine:histone-L-lysine N6-methyltransferase S-Adenosyl-L-methionin…	GO:0005634///nucleus+++GO:0000775///chromosome, centromeric region+++GO:0005720///nuclear heterochromatin	GO:0042054///histone methyltransferase activity+++GO:0003677///DNA binding+++GO:0018024///histone-lysine N-methyltransferase activity+++GO:0008270///zinc ion binding	GO:0016571///histone methylation+++GO:0080188///RNA-directed DNA methylation+++GO:0040029///regulation of gene expression, epigenetic	LOC_Os07g25450
4328218	LOC4328218	mRNA	-1.89433	2.27845e-38								LOC_Os02g04130
9272115	LOC9272115	mRNA	-1.32505	1.9441e-12								LOC_Os06g48500
4325152	LOC4325152	mRNA	-1.29127	3.22901e-13
4332100	LOC4332100	mRNA	-0.301749	0.000261922
4336540	LOC4336540	mRNA	-0.609641	0.0075244					GO:0005634///nucleus	GO:0003700///DNA-binding transcription factor activity+++GO:0003677///DNA binding+++GO:0043565///sequence-specific DNA binding	GO:0009414///response to water deprivation+++GO:0006351///transcription, DNA-templated+++GO:0008361///regulation of cell size+++GO:0032876///negative regulation of DNA endoreduplication+++GO:0045892///negative regulation of transcription, DNA-templated+++GO:0010090///trichome morphogenesis+++GO:0042631///cellular response to water deprivation+++GO:2000037///regulation of stomatal complex patterni…
4329667	LOC4329667	mRNA	-0.486546	1.54018e-20								LOC_Os02g35080
4340544	LOC4340544	mRNA	-0.360829	0.0272927					GO:0005886///plasma membrane+++GO:0016021///integral component of membrane	GO:0005524///ATP binding+++GO:0004675///transmembrane receptor protein serine/threonine kinase activity	GO:0009742///brassinosteroid mediated signaling pathway+++GO:0007166///cell surface receptor signaling pathway+++GO:0006468///protein phosphorylation	LOC_Os06g12120
4335067	LOC4335067	mRNA	-0.320861	2.58655e-06								LOC_Os04g09350
4340005	LOC4340005	mRNA	-0.565315	1.56654e-08					GO:0005634///nucleus+++GO:0000786///nucleosome	GO:0003677///DNA binding	GO:0006334///nucleosome assembly
4334444	LOC4334444	mRNA	-0.630177	2.04565e-10					GO:0000785///chromatin+++GO:0005634///nucleus+++GO:0005677///chromatin silencing complex	GO:0003682///chromatin binding+++GO:0046872///metal ion binding+++GO:0000976///transcription regulatory region sequence-specific DNA binding+++GO:0035064///methylated histone binding	GO:0031507///heterochromatin assembly+++GO:0006325///chromatin organization+++GO:0006351///transcription, DNA-templated+++GO:0048579///negative regulation of long-day photoperiodism, flowering+++GO:0035067///negative regulation of histone acetylation+++GO:0006355///regulation of transcription, DNA-templated+++GO:0009791///post-embryonic development+++GO:0006342///chromatin silencing+++GO:0009845/…	LOC_Os03g58530
4349414	LOC4349414	mRNA	-0.37584	3.94671e-15	04712///Circadian rhythm - plant+++04064///NF-kappa B signaling pathway+++04137///Mitophagy - animal+++04520///Adherens junction+++04310///Wnt signaling pathway+++04139///Mitophagy - yeast+++03008///Ribosome biogenesis in eukaryotes				GO:0005829///cytosol+++GO:0005634///nucleus+++GO:0005956///protein kinase CK2 complex	GO:0019887///protein kinase regulator activity	GO:0006468///protein phosphorylation+++GO:0071900///regulation of protein serine/threonine kinase activity	LOC_Os10g41520
4343391	LOC4343391	mRNA	-0.401396	0.00166944						GO:0004497///monooxygenase activity+++GO:0020037///heme binding+++GO:0016705///oxidoreductase activity, acting on paired donors, with incorporation or reduction of molecular oxygen+++GO:0005506///iron ion binding	GO:0010268///brassinosteroid homeostasis+++GO:0007275///multicellular organism development+++GO:0016132///brassinosteroid biosynthetic process+++GO:0016125///sterol metabolic process	LOC_Os07g33420
4341460	LOC4341460	mRNA	-0.476013	3.28976e-14					GO:0016021///integral component of membrane+++GO:0009941///chloroplast envelope+++GO:0005743///mitochondrial inner membrane+++GO:0009706///chloroplast inner membrane+++GO:0009536///plastid+++GO:0005739///mitochondrion+++GO:0009507///chloroplast		GO:0055085///transmembrane transport+++GO:0006839///mitochondrial transport
4332314	LOC4332314	mRNA	-0.623181	2.19583e-17						GO:0017112///Rab guanyl-nucleotide exchange factor activity		LOC_Os03g15390
4328289	LOC4328289	mRNA	-0.30202	0.0260155					GO:0009330///DNA topoisomerase complex (ATP-hydrolyzing)	GO:0003690///double-stranded DNA binding	GO:0042023///DNA endoreduplication
4348555	LOC4348555	mRNA	-0.397833	2.73324e-20					GO:0016021///integral component of membrane	GO:0005516///calmodulin binding+++GO:0071949///FAD binding+++GO:0050614///delta24-sterol reductase activity		LOC_Os10g25780
4344892	LOC4344892	mRNA	-0.508233	4.70335e-13
4326739	LOC4326739	mRNA	-0.439741	0.0217124	01110///Biosynthesis of secondary metabolites+++00770///Pantothenate and CoA biosynthesis+++01100///Metabolic pathways		M00119///Pantothenate biosynthesis, valine/L-aspartate => pantothenate	R01226///5,10-Methylenetetrahydrofolate:3-methyl-2-oxobutanoate hydroxymethyltransferase 5,10-Methylenetetrahydrofolate + 3-Methyl-2-oxobutanoic acid + H2O <=> Tetrahydrofolate + 2-Dehydropantoate	GO:0005739///mitochondrion	GO:0003864///3-methyl-2-oxobutanoate hydroxymethyltransferase activity+++GO:0003824///catalytic activity+++GO:0046872///metal ion binding+++GO:0008168///methyltransferase activity+++GO:0016740///transferase activity+++GO:0000287///magnesium ion binding	GO:0015940///pantothenate biosynthetic process+++GO:0032259///methylation	LOC_Os01g12560
4346846	LOC4346846	mRNA	-0.950672	1.68537e-05	01110///Biosynthesis of secondary metabolites+++00062///Fatty acid elongation		M00415///Fatty acid biosynthesis, elongation, endoplasmic reticulum	R09419///acyl-CoA:malonyl-CoA C-acyltransferase (decarboxylating) Malonyl-CoA + Acyl-CoA <=> 3-Oxoacyl-CoA + CoA + CO2+++R10825///very-long-chain acyl-CoA:malonyl-CoA C-acyltransferase (decarboxylating) Very-long-chain acyl-CoA + Malonyl-CoA <=> Very-long-chain 3-oxoacyl-CoA + CO2 + CoA	GO:0016021///integral component of membrane	GO:0016747///transferase activity, transferring acyl groups other than amino-acyl groups	GO:0006633///fatty acid biosynthetic process	LOC_Os09g19650
4327673	LOC4327673	mRNA	-1.13392	3.00379e-59	04144///Endocytosis						GO:0015031///protein transport	LOC_Os01g51010
4334034	LOC4334034	mRNA	-1.36162	2.5589e-20								LOC_Os03g52680
4323914	LOC4323914	mRNA	-1.34831	0.0207404						GO:0043565///sequence-specific DNA binding	GO:0006351///transcription, DNA-templated
4335780	LOC4335780	mRNA	-3.08555	2.74803e-126					GO:0005576///extracellular region+++GO:0005634///nucleus+++GO:0046658///anchored component of plasma membrane+++GO:0005737///cytoplasm+++GO:0005618///cell wall	GO:0042973///glucan endo-1,3-beta-D-glucosidase activity+++GO:0030247///polysaccharide binding+++GO:0004553///hydrolase activity, hydrolyzing O-glycosyl compounds	GO:0006952///defense response+++GO:0071555///cell wall organization+++GO:0005975///carbohydrate metabolic process
4347005	LOC4347005	mRNA	-0.814217	2.00797e-59	04070///Phosphatidylinositol signaling system+++04145///Phagosome+++04810///Regulation of actin cytoskeleton+++00562///Inositol phosphate metabolism	H00957///Fleck corneal dystrophy (FCD)		R10951///ATP:1-phosphatidyl-1D-myo-inositol 5-phosphotransferase ATP + 1-Phosphatidyl-D-myo-inositol <=> ADP + 1-Phosphatidyl-1D-myo-inositol 5-phosphate+++R05802///ATP:1-phosphatidyl-1D-myo-inositol-3-phosphate 5-phosphotransferase ATP + 1-Phosphatidyl-1D-myo-inositol 3-phosphate <=> ADP + 1-Phosphatidyl-1D-myo-inositol 3,5-bisphosphate	GO:0005829///cytosol+++GO:0005739///mitochondrion+++GO:0005768///endosome+++GO:0010008///endosome membrane	GO:0046872///metal ion binding+++GO:0000285///1-phosphatidylinositol-3-phosphate 5-kinase activity+++GO:0005524///ATP binding	GO:0009555///pollen development+++GO:0006457///protein folding+++GO:0007033///vacuole organization+++GO:0042147///retrograde transport, endosome to Golgi+++GO:0090332///stomatal closure+++GO:0010256///endomembrane system organization	LOC_Os09g23740
4331961	LOC4331961	mRNA	-0.489247	0.00214431								LOC_Os03g10250
4341992	LOC4341992	mRNA	-0.375349	0.0117154								LOC_Os06g49060
4347439	LOC4347439	mRNA	-0.360307	0.00133831	04075///Plant hormone signal transduction+++04016///MAPK signaling pathway - plant				GO:0005622///intracellular+++GO:0005634///nucleus	GO:0003700///DNA-binding transcription factor activity+++GO:0003677///DNA binding	GO:0006355///regulation of transcription, DNA-templated
4330189	LOC4330189	mRNA	-0.955728	0.00173568					GO:0005634///nucleus	GO:0003700///DNA-binding transcription factor activity+++GO:0003677///DNA binding	GO:0009835///fruit ripening+++GO:0009873///ethylene-activated signaling pathway+++GO:0006351///transcription, DNA-templated+++GO:0006952///defense response	LOC_Os02g43790
4325596	LOC4325596	mRNA	-0.38584	4.00308e-13					GO:0005576///extracellular region	GO:0004252///serine-type endopeptidase activity		LOC_Os01g56320
9267158	LOC9267158	mRNA	-1.11541	2.9394e-13	01100///Metabolic pathways+++00591///Linoleic acid metabolism+++01110///Biosynthesis of secondary metabolites+++00592///alpha-Linolenic acid metabolism		M00113///Jasmonic acid biosynthesis	R03626///Linoleate:oxygen 13-oxidoreductase Linoleate + Oxygen <=> (9Z,11E)-(13S)-13-Hydroperoxyoctadeca-9,11-dienoic acid+++R07869///(9Z,12Z,15Z)-Octadecatrienoic acid + Oxygen <=> 13(S)-HPOT+++R07864///(9Z,12Z,15Z)-Octadecatrienoic acid + Oxygen <=> 9(S)-HPOT		GO:0046872///metal ion binding+++GO:0016165///linoleate 13S-lipoxygenase activity	GO:0031408///oxylipin biosynthetic process	LOC_Os04g37430
107277348	LOC107277348	mRNA	-1.00146	2.01433e-30					GO:0005634///nucleus	GO:0003700///DNA-binding transcription factor activity+++GO:0003677///DNA binding	GO:0006351///transcription, DNA-templated	LOC_Os05g49240
4340553	LOC4340553	mRNA	-1.13541	0.000269579					GO:0005634///nucleus	GO:0003677///DNA binding	GO:0007275///multicellular organism development+++GO:0006355///regulation of transcription, DNA-templated+++GO:0006351///transcription, DNA-templated	LOC_Os06g12230
4334332	LOC4334332	mRNA	-0.311417	0.000785974						GO:0016491///oxidoreductase activity		LOC_Os03g57070
4327215	LOC4327215	mRNA	-0.374571	1.29588e-05			M00286///GINS complex		GO:0031298///replication fork protection complex+++GO:0000811///GINS complex		GO:0032508///DNA duplex unwinding+++GO:1902975///mitotic DNA replication initiation+++GO:0000727///double-strand break repair via break-induced replication	LOC_Os01g14610
4325503	LOC4325503	mRNA	-0.525648	3.56658e-14	04075///Plant hormone signal transduction				GO:0019005///SCF ubiquitin ligase complex+++GO:0005737///cytoplasm	GO:0031625///ubiquitin protein ligase binding	GO:0030162///regulation of proteolysis+++GO:0006952///defense response+++GO:0043161///proteasome-mediated ubiquitin-dependent protein catabolic process	LOC_Os01g56200
4345706	LOC4345706	mRNA	-1.2723	6.57714e-95	01100///Metabolic pathways+++00500///Starch and sucrose metabolism			R02778///Trehalose-6-phosphate phosphohydrolase alpha,alpha'-Trehalose 6-phosphate + H2O <=> alpha,alpha-Trehalose + Orthophosphate+++R02737///UDPglucose:D-glucose-6-phosphate 1-alpha-D-glucosyltransferase UDP-glucose + alpha-D-Glucose 6-phosphate <=> UDP + alpha,alpha'-Trehalose 6-phosphate	GO:0005737///cytoplasm	GO:0016757///transferase activity, transferring glycosyl groups+++GO:0016791///phosphatase activity	GO:0070413///trehalose metabolism in response to stress+++GO:0005992///trehalose biosynthetic process	LOC_Os08g34580
4344189	LOC4344189	mRNA	-0.324009	4.7999e-05						GO:0003723///RNA binding		LOC_Os07g46760
4332574	LOC4332574	mRNA	-1.8857	0					GO:0031225///anchored component of membrane+++GO:0009506///plasmodesma+++GO:0005768///endosome+++GO:0005794///Golgi apparatus+++GO:0046658///anchored component of plasma membrane+++GO:0005802///trans-Golgi network		GO:0010215///cellulose microfibril organization	LOC_Os03g18910
4347588	LOC4347588	mRNA	-0.485981	4.4861e-20					GO:0016021///integral component of membrane+++GO:0016020///membrane			LOC_Os09g34180
9269766	LOC9269766	mRNA	-2.12025	1.79151e-13					GO:0005856///cytoskeleton+++GO:0005886///plasma membrane+++GO:0005737///cytoplasm	GO:0003729///mRNA binding+++GO:0046872///metal ion binding+++GO:0051015///actin filament binding	GO:0051017///actin filament bundle assembly
4332288	LOC4332288	mRNA	-0.305777	9.44083e-09					GO:0005773///vacuole+++GO:0048046///apoplast+++GO:0005618///cell wall	GO:0004565///beta-galactosidase activity+++GO:0030246///carbohydrate binding	GO:0005975///carbohydrate metabolic process	LOC_Os03g15010
4346431	LOC4346431	mRNA	-0.414179	2.25402e-07								LOC_Os09g03630
4343450	LOC4343450	mRNA	-0.696095	9.53177e-09					GO:0009536///plastid+++GO:0009507///chloroplast	GO:0005524///ATP binding+++GO:0016740///transferase activity+++GO:0004674///protein serine/threonine kinase activity+++GO:0016776///phosphotransferase activity, phosphate group as acceptor+++GO:0016301///kinase activity+++GO:0016772///transferase activity, transferring phosphorus-containing groups+++GO:0000166///nucleotide binding	GO:0006468///protein phosphorylation+++GO:0016310///phosphorylation	LOC_Os07g34640
4341942	LOC4341942	mRNA	-0.848202	0.000845929	04075///Plant hormone signal transduction				GO:0005618///cell wall+++GO:0005886///plasma membrane+++GO:0005737///cytoplasm+++GO:0009505///plant-type cell wall+++GO:0005794///Golgi apparatus+++GO:0048046///apoplast	GO:0016762///xyloglucan:xyloglucosyl transferase activity+++GO:0004553///hydrolase activity, hydrolyzing O-glycosyl compounds	GO:0010411///xyloglucan metabolic process+++GO:0042546///cell wall biogenesis+++GO:0071669///plant-type cell wall organization or biogenesis+++GO:0009828///plant-type cell wall loosening	LOC_Os06g48180
4331284	LOC4331284	mRNA	-0.503169	0.000247724	01212///Fatty acid metabolism+++00062///Fatty acid elongation+++04142///Lysosome+++01100///Metabolic pathways	H00810///Progressive myoclonic epilepsy (PME/ EPM)+++H00149///Neuronal ceroid lipofuscinosis (NCL)		R01274///palmitoyl-CoA hydrolase Palmitoyl-CoA + H2O <=> CoA + Hexadecanoic acid		GO:0098599///palmitoyl hydrolase activity		LOC_Os03g01150
4333384	LOC4333384	mRNA	-0.316189	2.48722e-09					GO:0030692///Noc4p-Nop14p complex+++GO:0005730///nucleolus+++GO:0032040///small-subunit processome		GO:0030490///maturation of SSU-rRNA	LOC_Os03g40110
4349343	LOC4349343	mRNA	-1.72158	3.98509e-135					GO:0016021///integral component of membrane	GO:0046872///metal ion binding+++GO:0016757///transferase activity, transferring glycosyl groups		LOC_Os10g40640
112939307	LOC112939307	mRNA	-1.30654	2.14398e-09					GO:0016021///integral component of membrane
4334710	LOC4334710	mRNA	-0.370299	4.69131e-16					GO:0016020///membrane+++GO:0005802///trans-Golgi network+++GO:0016021///integral component of membrane+++GO:0005794///Golgi apparatus+++GO:0005886///plasma membrane	GO:0016759///cellulose synthase activity+++GO:0016760///cellulose synthase (UDP-forming) activity+++GO:0016757///transferase activity, transferring glycosyl groups+++GO:0016740///transferase activity+++GO:0046872///metal ion binding	GO:0071555///cell wall organization+++GO:0009833///plant-type primary cell wall biogenesis+++GO:0030244///cellulose biosynthetic process	LOC_Os03g62090
4331573	LOC4331573	mRNA	-0.378007	1.60263e-07								LOC_Os03g04710
4349418	LOC4349418	mRNA	-0.438163	1.74087e-15		H01432///Choreoacanthocytosis+++H01600///Parkinsonian syndrome+++H00832///Core neuroacanthocytosis syndromes
4335929	LOC4335929	mRNA	-0.604121	3.0259e-06								LOC_Os04g35940
4350824	LOC4350824	mRNA	-0.596527	1.29085e-07	00520///Amino sugar and nucleotide sugar metabolism			R05191///UDP-D-galacturonate:1,4-alpha-poly-D-galacturonate 4-alpha-D-galacturonosyltransferase n UDP-D-galacturonate <=> n UDP + Pectin	GO:0000139///Golgi membrane+++GO:0016021///integral component of membrane	GO:0047262///polygalacturonate 4-alpha-galacturonosyltransferase activity	GO:0071555///cell wall organization+++GO:0045489///pectin biosynthetic process	LOC_Os11g37980
107281221	LOC107281221	mRNA	-1.45932	7.77979e-09
4332004	LOC4332004	mRNA	-2.31113	5.73655e-31						GO:0004722///protein serine/threonine phosphatase activity+++GO:0046872///metal ion binding		LOC_Os03g10950
9269040	LOC9269040	mRNA	-0.515558	5.35423e-09
4327611	LOC4327611	mRNA	-2.1024	2.1697e-14					GO:0005634///nucleus	GO:0003677///DNA binding+++GO:0043565///sequence-specific DNA binding+++GO:0003700///DNA-binding transcription factor activity	GO:0006355///regulation of transcription, DNA-templated
4347449	LOC4347449	mRNA	-0.449493	5.13186e-09					GO:0016021///integral component of membrane+++GO:0005737///cytoplasm+++GO:0005634///nucleus	GO:0003700///DNA-binding transcription factor activity+++GO:0003677///DNA binding	GO:0009962///regulation of flavonoid biosynthetic process+++GO:0006351///transcription, DNA-templated+++GO:0045893///positive regulation of transcription, DNA-templated+++GO:0009644///response to high light intensity
4330077	LOC4330077	mRNA	-0.558079	1.09888e-14	01110///Biosynthesis of secondary metabolites+++01100///Metabolic pathways+++00460///Cyanoamino acid metabolism			R00486///3-Cyano-L-alanine aminohydrolase 3-Cyano-L-alanine + 2 H2O <=> L-Aspartate + Ammonia+++R01267///L-asparagine hydro-lyase (3-cyanoalanine-forming) L-Asparagine <=> 3-Cyano-L-alanine + H2O		GO:0016787///hydrolase activity+++GO:0000257///nitrilase activity+++GO:0047427///cyanoalanine nitrilase activity+++GO:0080109///indole-3-acetonitrile nitrile hydratase activity+++GO:0016810///hydrolase activity, acting on carbon-nitrogen (but not peptide) bonds	GO:0006807///nitrogen compound metabolic process+++GO:0019499///cyanide metabolic process+++GO:0019500///cyanide catabolic process	LOC_Os02g42350
4327968	LOC4327968	mRNA	-0.383978	0.00671201	01100///Metabolic pathways+++01110///Biosynthesis of secondary metabolites+++00900///Terpenoid backbone biosynthesis+++01130///Biosynthesis of antibiotics		M00096///C5 isoprenoid biosynthesis, non-mevalonate pathway	R05634///ATP:4-(Cytidine 5'-diphospho)-2-C-methyl-D-erythritol 2-phosphotransferase 4-(Cytidine 5'-diphospho)-2-C-methyl-D-erythritol + ATP <=> 2-Phospho-4-(cytidine 5'-diphospho)-2-C-methyl-D-erythritol + ADP	GO:0009570///chloroplast stroma+++GO:0009507///chloroplast+++GO:0009536///plastid	GO:0000166///nucleotide binding+++GO:0016740///transferase activity+++GO:0050515///4-(cytidine 5'-diphospho)-2-C-methyl-D-erythritol kinase activity+++GO:0005524///ATP binding+++GO:0016301///kinase activity	GO:0016114///terpenoid biosynthetic process+++GO:0019288///isopentenyl diphosphate biosynthetic process, methylerythritol 4-phosphate pathway+++GO:0016310///phosphorylation+++GO:0008299///isoprenoid biosynthetic process	LOC_Os01g58790
4339527	LOC4339527	mRNA	-1.13693	0.00843841							GO:0006869///lipid transport
4331508	LOC4331508	mRNA	-0.405805	1.31131e-10					GO:0005634///nucleus	GO:0003677///DNA binding	GO:0006351///transcription, DNA-templated+++GO:0006355///regulation of transcription, DNA-templated	LOC_Os03g03900
4343944	LOC4343944	mRNA	-0.48431	3.53371e-09	04016///MAPK signaling pathway - plant+++04075///Plant hormone signal transduction				GO:0005737///cytoplasm+++GO:0005634///nucleus	GO:0004674///protein serine/threonine kinase activity+++GO:0005524///ATP binding	GO:0035556///intracellular signal transduction+++GO:0090351///seedling development+++GO:0006468///protein phosphorylation+++GO:0009738///abscisic acid-activated signaling pathway+++GO:0009845///seed germination	LOC_Os07g42940
4345399	LOC4345399	mRNA	-0.597125	2.16742e-29					GO:0016021///integral component of membrane+++GO:0016020///membrane	GO:0022857///transmembrane transporter activity	GO:0055085///transmembrane transport
4332368	LOC4332368	mRNA	-0.700196	0.0182309						GO:0046872///metal ion binding+++GO:0008233///peptidase activity+++GO:0043130///ubiquitin binding	GO:0008285///negative regulation of cell proliferation+++GO:1900057///positive regulation of leaf senescence+++GO:0048317///seed morphogenesis+++GO:0046621///negative regulation of organ growth+++GO:0048482///plant ovule morphogenesis	LOC_Os03g16090
9271614	LOC9271614	mRNA	-0.301368	6.09265e-05						GO:0043531///ADP binding		LOC_Os06g48990
4325430	LOC4325430	mRNA	-0.37609	0.0345595					GO:0005886///plasma membrane+++GO:0016021///integral component of membrane	GO:0005524///ATP binding+++GO:0004674///protein serine/threonine kinase activity		LOC_Os01g28730
107278127	LOC107278127	mRNA	-0.511036	0.000789589						GO:0003676///nucleic acid binding
4340994	LOC4340994	mRNA	-1.58974	0.0103807	00520///Amino sugar and nucleotide sugar metabolism+++01100///Metabolic pathways			R01206///[1,4-(N-Acetyl-beta-D-glucosaminyl)]n glycanohydrolase Chitin + H2O <=> N-Acetyl-D-glucosamine + Chitin+++R02334///[1,4-(N-Acetyl-beta-D-glucosaminyl)]n glycanohydrolase Chitin + H2O <=> Chitobiose + Chitin	GO:0005576///extracellular region		GO:0006952///defense response+++GO:0005975///carbohydrate metabolic process
4349158	LOC4349158	mRNA	-0.434381	0.0013695								LOC_Os10g38020
4336324	LOC4336324	mRNA	-0.384714	0.0150657					GO:0005737///cytoplasm	GO:0004674///protein serine/threonine kinase activity+++GO:0005524///ATP binding
4330133	LOC4330133	mRNA	-0.456047	0.00215435	04612///Antigen processing and presentation+++04142///Lysosome				GO:0005773///vacuole	GO:0008233///peptidase activity+++GO:0004197///cysteine-type endopeptidase activity	GO:0006508///proteolysis+++GO:0006624///vacuolar protein processing+++GO:0051603///proteolysis involved in cellular protein catabolic process	LOC_Os02g43010
107276979	LOC107276979	mRNA	-0.552633	0.0346195
4345742	LOC4345742	mRNA	-1.63259	3.6204e-16	04016///MAPK signaling pathway - plant+++04626///Plant-pathogen interaction				GO:0016020///membrane+++GO:0016021///integral component of membrane	GO:0016491///oxidoreductase activity+++GO:0050664///oxidoreductase activity, acting on NAD(P)H, oxygen as acceptor+++GO:0005509///calcium ion binding+++GO:0004601///peroxidase activity	GO:0055114///oxidation-reduction process+++GO:0098869///cellular oxidant detoxification	LOC_Os08g35210
4332350	LOC4332350	mRNA	-1.25287	9.59574e-29					GO:0016607///nuclear speck+++GO:0005681///spliceosomal complex	GO:0003676///nucleic acid binding	GO:0006397///mRNA processing+++GO:0009644///response to high light intensity+++GO:0008380///RNA splicing+++GO:0043484///regulation of RNA splicing	LOC_Os03g15890
4340085	LOC4340085	mRNA	-1.86321	6.84039e-13					GO:0016021///integral component of membrane		GO:0009877///nodulation	LOC_Os06g05020
4348008	LOC4348008	mRNA	-0.9725	1.07688e-49								LOC_Os10g03550
4344349	LOC4344349	mRNA	-0.672632	4.25919e-12	04075///Plant hormone signal transduction				GO:0005634///nucleus	GO:0003677///DNA binding+++GO:0003700///DNA-binding transcription factor activity+++GO:0043565///sequence-specific DNA binding+++GO:0005515///protein binding	GO:0006355///regulation of transcription, DNA-templated+++GO:0006351///transcription, DNA-templated+++GO:0006952///defense response+++GO:0042742///defense response to bacterium+++GO:0045893///positive regulation of transcription, DNA-templated	LOC_Os07g48820
4335798	LOC4335798	mRNA	-1.7423	8.7451e-70					GO:0016021///integral component of membrane			LOC_Os04g33820
9266978	LOC9266978	mRNA	-0.709394	0.000923855					GO:0009507///chloroplast			LOC_Os05g01530
4351382	LOC4351382	mRNA	-0.538118	0.00843841					GO:0016021///integral component of membrane	GO:0015238///drug transmembrane transporter activity+++GO:0015297///antiporter activity	GO:0006855///drug transmembrane transport	LOC_Os12g03200
4352083	LOC4352083	mRNA	-0.91557	0.0174861					GO:0005773///vacuole+++GO:0010287///plastoglobule+++GO:0009570///chloroplast stroma+++GO:0009941///chloroplast envelope+++GO:0000427///plastid-encoded plastid RNA polymerase complex+++GO:0009506///plasmodesma+++GO:0005777///peroxisome+++GO:0016020///membrane+++GO:0048046///apoplast+++GO:0009507///chloroplast+++GO:0005840///ribosome+++GO:0010319///stromule	GO:0003824///catalytic activity+++GO:0050662///coenzyme binding+++GO:0003723///RNA binding+++GO:0010297///heteropolysaccharide binding+++GO:0003677///DNA binding+++GO:0019843///rRNA binding	GO:0042742///defense response to bacterium+++GO:0007623///circadian rhythm+++GO:0009611///response to wounding+++GO:0005996///monosaccharide metabolic process+++GO:0009409///response to cold+++GO:0006364///rRNA processing+++GO:0042631///cellular response to water deprivation+++GO:0045727///positive regulation of translation+++GO:0045893///positive regulation of transcription, DNA-templated+++GO:0…	LOC_Os12g23180
4326784	LOC4326784	mRNA	-0.427521	0.0115759					GO:0019898///extrinsic component of membrane+++GO:0009507///chloroplast+++GO:0009654///photosystem II oxygen evolving complex	GO:0005509///calcium ion binding	GO:0015979///photosynthesis
4332369	LOC4332369	mRNA	-0.300223	2.71346e-09	04810///Regulation of actin cytoskeleton+++04261///Adrenergic signaling in cardiomyocytes+++04910///Insulin signaling pathway+++04720///Long-term potentiation+++04750///Inflammatory mediator regulation of TRP channels+++04114///Oocyte meiosis+++04024///cAMP signaling pathway+++04728///Dopaminergic synapse+++04113///Meiosis - yeast+++04022///cGMP-PKG signaling pathway+++03015///mRNA surveillance p…					GO:0046872///metal ion binding+++GO:0004721///phosphoprotein phosphatase activity		LOC_Os03g16110
4342106	LOC4342106	mRNA	-0.760256	7.35882e-11					GO:0009507///chloroplast+++GO:0009579///thylakoid		GO:0009611///response to wounding+++GO:0006979///response to oxidative stress+++GO:0007568///aging+++GO:0009753///response to jasmonic acid	LOC_Os06g50930
4332189	LOC4332189	mRNA	-1.25719	0.0494917					GO:0005829///cytosol			LOC_Os03g13450
4347611	LOC4347611	mRNA	-1.01468	3.04729e-06	00511///Other glycan degradation	H00141///Fucosidosis+++H00422///Glycoproteinoses			GO:0005773///vacuole+++GO:0048046///apoplast	GO:0004560///alpha-L-fucosidase activity	GO:0005975///carbohydrate metabolic process	LOC_Os09g34920
9267051	LOC9267051	mRNA	-1.26432	1.0822e-31								LOC_Os04g58890
4341835	LOC4341835	mRNA	-0.498	0.000758037						GO:0016787///hydrolase activity	GO:0016042///lipid catabolic process
4332207	LOC4332207	mRNA	-0.439555	2.35902e-08					GO:0005739///mitochondrion		GO:0007005///mitochondrion organization	LOC_Os03g13770
4331998	LOC4331998	mRNA	-0.555686	0.00136786					GO:0016021///integral component of membrane+++GO:0005886///plasma membrane			LOC_Os03g10870
107276334	LOC107276334	mRNA	-0.797299	0.00601332					GO:0016021///integral component of membrane			LOC_Os07g04370
9268653	LOC9268653	mRNA	-2.38976	7.77347e-14					GO:0005886///plasma membrane+++GO:0005634///nucleus	GO:0005524///ATP binding+++GO:0004675///transmembrane receptor protein serine/threonine kinase activity	GO:0006952///defense response+++GO:0007166///cell surface receptor signaling pathway+++GO:0006468///protein phosphorylation	LOC_Os04g47620
4336633	LOC4336633	mRNA	-0.495544	5.0553e-07						GO:0016787///hydrolase activity	GO:0008152///metabolic process	LOC_Os04g47020
4340222	LOC4340222	mRNA	-0.582111	2.70583e-06					GO:0016021///integral component of membrane			LOC_Os06g06780
4347215	LOC4347215	mRNA	-0.549589	0.000785974					GO:0005634///nucleus	GO:0043621///protein self-association+++GO:0046982///protein heterodimerization activity+++GO:0046872///metal ion binding+++GO:0044212///transcription regulatory region DNA binding+++GO:0003700///DNA-binding transcription factor activity	GO:0009630///gravitropism+++GO:0006355///regulation of transcription, DNA-templated+++GO:2000012///regulation of auxin polar transport+++GO:0006351///transcription, DNA-templated+++GO:0009965///leaf morphogenesis+++GO:0010601///positive regulation of auxin biosynthetic process+++GO:0048444///floral organ morphogenesis+++GO:2000904///regulation of starch metabolic process	LOC_Os09g27650
4328953	LOC4328953	mRNA	-0.550631	0.000358513					GO:0005634///nucleus	GO:0003700///DNA-binding transcription factor activity+++GO:0043565///sequence-specific DNA binding	GO:0006351///transcription, DNA-templated+++GO:0010200///response to chitin+++GO:0006952///defense response	LOC_Os02g16540
4349863	LOC4349863	mRNA	-0.324169	1.14702e-18					GO:0009506///plasmodesma+++GO:0005829///cytosol+++GO:0005739///mitochondrion+++GO:0005856///cytoskeleton+++GO:0005618///cell wall+++GO:0009570///chloroplast stroma+++GO:0009941///chloroplast envelope+++GO:0005730///nucleolus+++GO:0005886///plasma membrane	GO:0000166///nucleotide binding+++GO:0005524///ATP binding	GO:0009845///seed germination+++GO:0009611///response to wounding+++GO:0010053///root epidermal cell differentiation+++GO:0009733///response to auxin+++GO:0048767///root hair elongation+++GO:0048364///root development+++GO:0009416///response to light stimulus+++GO:0051301///cell division	LOC_Os11g06390
4341317	LOC4341317	mRNA	-0.35883	0.000623887	00830///Retinol metabolism+++00561///Glycerolipid metabolism+++04975///Fat digestion and absorption+++01100///Metabolic pathways	H01174///Congenital diarrhea	M00089///Triacylglycerol biosynthesis	R02367///Palmitoyl-CoA:retinol O-acyltransferase Palmitoyl-CoA + Retinol <=> CoA + Retinyl palmitate+++R08381///Palmitoyl-CoA:retinol O-acyltransferase Palmitoyl-CoA + 11-cis-Retinol <=> CoA + 11-cis-Retinyl palmitate+++R02366///Acyl-CoA:retinol O-acyltransferase Acyl-CoA + Retinol <=> CoA + Retinyl ester+++R02251///acyl-CoA:1,2-diacyl-sn-glycerol O-acyltransferase Triacylglycerol + CoA <=> 1,2-D…	GO:0005789///endoplasmic reticulum membrane+++GO:0016020///membrane+++GO:0005783///endoplasmic reticulum+++GO:0009941///chloroplast envelope+++GO:0016021///integral component of membrane	GO:0004144///diacylglycerol O-acyltransferase activity+++GO:0016740///transferase activity+++GO:0008374///O-acyltransferase activity+++GO:0016746///transferase activity, transferring acyl groups	GO:0006071///glycerol metabolic process+++GO:0019432///triglyceride biosynthetic process+++GO:0006629///lipid metabolic process	LOC_Os06g36800
4349333	LOC4349333	mRNA	-0.557708	3.94389e-05	00500///Starch and sucrose metabolism+++01100///Metabolic pathways			R02778///Trehalose-6-phosphate phosphohydrolase alpha,alpha'-Trehalose 6-phosphate + H2O <=> alpha,alpha-Trehalose + Orthophosphate	GO:0005773///vacuole+++GO:0005737///cytoplasm+++GO:0005774///vacuolar membrane+++GO:0009507///chloroplast+++GO:0022626///cytosolic ribosome+++GO:0016020///membrane	GO:0004252///serine-type endopeptidase activity+++GO:0008240///tripeptidyl-peptidase activity+++GO:0004805///trehalose-phosphatase activity+++GO:0016787///hydrolase activity+++GO:0003824///catalytic activity+++GO:0004177///aminopeptidase activity+++GO:0008233///peptidase activity+++GO:0008236///serine-type peptidase activity	GO:0005992///trehalose biosynthetic process+++GO:0016311///dephosphorylation+++GO:0006508///proteolysis	LOC_Os10g40550
4331776	LOC4331776	mRNA	-1.52791	0.0072199					GO:0005634///nucleus	GO:0005515///protein binding+++GO:0046983///protein dimerization activity	GO:0006355///regulation of transcription, DNA-templated+++GO:0009742///brassinosteroid mediated signaling pathway+++GO:0080113///regulation of seed growth+++GO:0040008///regulation of growth	LOC_Os03g07510
112939370	LOC112939370	mRNA	-0.558248	0.00895346						GO:0003676///nucleic acid binding	GO:0015074///DNA integration
107276067	LOC107276067	mRNA	-0.754861	0.0299208					GO:0005634///nucleus	GO:0003700///DNA-binding transcription factor activity+++GO:0003677///DNA binding	GO:0006351///transcription, DNA-templated+++GO:0006355///regulation of transcription, DNA-templated
4334827	LOC4334827	mRNA	-1.22056	0.00235314					GO:0005618///cell wall+++GO:0048046///apoplast	GO:0004553///hydrolase activity, hydrolyzing O-glycosyl compounds+++GO:0016762///xyloglucan:xyloglucosyl transferase activity	GO:0042546///cell wall biogenesis+++GO:0010411///xyloglucan metabolic process+++GO:0071555///cell wall organization	LOC_Os03g63760
4323839	LOC4323839	mRNA	-0.34359	0.000249747	04622///RIG-I-like receptor signaling pathway	H00658///Syndromic X-linked mental retardation			GO:0009507///chloroplast+++GO:0005737///cytoplasm+++GO:0005730///nucleolus	GO:0004004///ATP-dependent RNA helicase activity+++GO:0005524///ATP binding+++GO:0003723///RNA binding	GO:0010501///RNA secondary structure unwinding	LOC_Os01g73900
4339907	LOC4339907	mRNA	-0.38553	4.91938e-08								LOC_Os06g02340
4324805	LOC4324805	mRNA	-0.312881	0.000369604					GO:0005634///nucleus+++GO:0005737///cytoplasm+++GO:0009295///nucleoid+++GO:0042644///chloroplast nucleoid+++GO:0009507///chloroplast	GO:0043621///protein self-association+++GO:0016301///kinase activity+++GO:0016773///phosphotransferase activity, alcohol group as acceptor	GO:0009658///chloroplast organization+++GO:0042793///plastid transcription	LOC_Os01g63220
4336059	LOC4336059	mRNA	-4.15134	0.00278124					GO:0016021///integral component of membrane
9267360	LOC9267360	mRNA	-0.307766	6.22187e-05	03030///DNA replication+++03420///Nucleotide excision repair+++03460///Fanconi anemia pathway+++03440///Homologous recombination+++03430///Mismatch repair		M00288///RPA complex			GO:0005524///ATP binding+++GO:0003678///DNA helicase activity	GO:0006281///DNA repair+++GO:0006310///DNA recombination+++GO:0000723///telomere maintenance
4341681	LOC4341681	mRNA	-1.67258	0.00265121					GO:0016021///integral component of membrane+++GO:0005794///Golgi apparatus+++GO:0005802///trans-Golgi network+++GO:0005768///endosome	GO:0046872///metal ion binding	GO:0055114///oxidation-reduction process	LOC_Os06g44040
4338087	LOC4338087	mRNA	-1.07129	9.63751e-07	00983///Drug metabolism - other enzymes+++00240///Pyrimidine metabolism+++01100///Metabolic pathways			R02485///deoxycytidine aminohydrolase Deoxycytidine + H2O <=> Deoxyuridine + Ammonia+++R08221///5'-deoxy-5-fluorocytidine aminohydrolase 5'-Deoxy-5-fluorocytidine + H2O <=> 5'-Deoxy-5-fluorouridine + Ammonia+++R01878///Cytidine aminohydrolase Cytidine + H2O <=> Uridine + Ammonia
9270682	LOC9270682	mRNA	-0.332688	3.82518e-10								LOC_Os02g30530
4338972	LOC4338972	mRNA	-0.802907	2.1316e-34							GO:0006950///response to stress
4328384	LOC4328384	mRNA	-0.549747	0.00613324					GO:0016021///integral component of membrane+++GO:0016020///membrane			LOC_Os02g06580
9269106	LOC9269106	mRNA	-0.660329	1.89783e-55	03440///Homologous recombination+++03430///Mismatch repair+++03030///DNA replication+++03460///Fanconi anemia pathway+++03420///Nucleotide excision repair		M00288///RPA complex			GO:0005524///ATP binding+++GO:0003678///DNA helicase activity	GO:0000723///telomere maintenance+++GO:0006310///DNA recombination+++GO:0006281///DNA repair
4341299	LOC4341299	mRNA	-0.965511	5.57889e-06
4335656	LOC4335656	mRNA	-0.722916	0.00301135	03018///RNA degradation	H01805///Tricho-hepato-enteric syndrome	M00392///Ski complex					LOC_Os04g31710
4324695	LOC4324695	mRNA	-0.719163	2.61032e-64	04115///p53 signaling pathway+++04120///Ubiquitin mediated proteolysis				GO:0005634///nucleus	GO:0016740///transferase activity+++GO:0008270///zinc ion binding	GO:0016567///protein ubiquitination	LOC_Os01g52110
4344231	LOC4344231	mRNA	-0.308932	4.25262e-10	01100///Metabolic pathways+++00051///Fructose and mannose metabolism+++00040///Pentose and glucuronate interconversions			R00878///alpha-D-Glucose aldose-ketose-isomerase alpha-D-Glucose <=> D-Fructose+++R01432///D-xylose aldose-ketose-isomerase D-Xylose <=> D-Xylulose		GO:0009045///xylose isomerase activity+++GO:0046872///metal ion binding	GO:0042732///D-xylose metabolic process	LOC_Os07g47290
107276359	LOC107276359	mRNA	-0.64523	3.11439e-18						GO:0008234///cysteine-type peptidase activity
4328225	LOC4328225	mRNA	-0.389497	3.99889e-09						GO:0016757///transferase activity, transferring glycosyl groups		LOC_Os02g04250
4344943	LOC4344943	mRNA	-0.390218	2.91206e-11								LOC_Os08g10740
4329853	LOC4329853	mRNA	-1.06394	1.33995e-47	00510///N-Glycan biosynthesis+++01100///Metabolic pathways		M00075///N-glycan biosynthesis, complex type	R05986///UDP-N-acetyl-D-glucosamine + G00015 <=> UDP + G00019	GO:0016021///integral component of membrane	GO:0003830///beta-1,4-mannosylglycoprotein 4-beta-N-acetylglucosaminyltransferase activity	GO:0006487///protein N-linked glycosylation	LOC_Os02g38140
4330441	LOC4330441	mRNA	-1.434	6.76128e-13								LOC_Os02g47370
4332339	LOC4332339	mRNA	-0.672003	1.14456e-09					GO:0005886///plasma membrane+++GO:0016021///integral component of membrane+++GO:0005789///endoplasmic reticulum membrane+++GO:0005783///endoplasmic reticulum+++GO:0005794///Golgi apparatus	GO:0050291///sphingosine N-acyltransferase activity	GO:0042759///long-chain fatty acid biosynthetic process+++GO:0002238///response to molecule of fungal origin+++GO:0046513///ceramide biosynthetic process	LOC_Os03g15750
9266478	LOC9266478	mRNA	-1.45453	2.09087e-65					GO:0005694///chromosome+++GO:0005634///nucleus		GO:0016567///protein ubiquitination+++GO:0051321///meiotic cell cycle+++GO:0006281///DNA repair	LOC_Os04g39080
107276750	LOC107276750	mRNA	-3.66599	9.92406e-15					GO:0005886///plasma membrane+++GO:0016021///integral component of membrane	GO:0004842///ubiquitin-protein transferase activity+++GO:0046872///metal ion binding+++GO:0061630///ubiquitin protein ligase activity	GO:0016567///protein ubiquitination+++GO:0048364///root development+++GO:0051301///cell division+++GO:0000209///protein polyubiquitination+++GO:0043161///proteasome-mediated ubiquitin-dependent protein catabolic process
4344326	LOC4344326	mRNA	-0.632646	1.57915e-06					GO:0005634///nucleus	GO:0003700///DNA-binding transcription factor activity+++GO:0044212///transcription regulatory region DNA binding+++GO:0046872///metal ion binding	GO:0010214///seed coat development+++GO:0006351///transcription, DNA-templated+++GO:0006355///regulation of transcription, DNA-templated	LOC_Os07g48570
4337299	LOC4337299	mRNA	-0.668791	3.08796e-31					GO:0005634///nucleus		GO:0006351///transcription, DNA-templated+++GO:0016480///negative regulation of transcription by RNA polymerase III	LOC_Os04g56730
9271595	LOC9271595	mRNA	-2.13843	0.00130332					GO:0048046///apoplast	GO:0046910///pectinesterase inhibitor activity	GO:0009651///response to salt stress+++GO:0006729///tetrahydrobiopterin biosynthetic process+++GO:0009737///response to abscisic acid+++GO:0110102///chloroplast ribulose bisphosphate carboxylase complex assembly	LOC_Os03g01020
4332285	LOC4332285	mRNA	-0.318591	5.17023e-17						GO:0004107///chorismate synthase activity	GO:0006355///regulation of transcription, DNA-templated	LOC_Os03g14980
4335176	LOC4335176	mRNA	-0.464416	0.0239804					GO:0016021///integral component of membrane+++GO:0016020///membrane	GO:0016887///ATPase activity+++GO:0005524///ATP binding+++GO:0042626///ATPase activity, coupled to transmembrane movement of substances+++GO:0000166///nucleotide binding	GO:0055085///transmembrane transport
9268882	LOC9268882	mRNA	-0.357539	7.36796e-10								LOC_Os03g27840
4335902	LOC4335902	mRNA	-1.92061	6.03924e-69		H00264///Charcot-Marie-Tooth disease (CMT)			GO:0005886///plasma membrane+++GO:0005737///cytoplasm	GO:0004364///glutathione transferase activity	GO:0006749///glutathione metabolic process+++GO:0009636///response to toxic substance	LOC_Os04g35560
4339775	LOC4339775	mRNA	-1.24325	2.01732e-16		H02086///Mitochondrial complex III deficiency+++H00820///Bjornstad syndrome+++H02007///GRACILE syndrome+++H01354///Leigh syndrome				GO:0016887///ATPase activity+++GO:0005524///ATP binding	GO:0009651///response to salt stress	LOC_Os05g51130
4349524	LOC4349524	mRNA	-0.856359	1.80932e-16								LOC_Os10g43060
9266513	LOC9266513	mRNA	-0.379952	5.64703e-08					GO:0000795///synaptonemal complex+++GO:0009506///plasmodesma+++GO:0043073///germ cell nucleus+++GO:0000794///condensed nuclear chromosome	GO:0008094///DNA-dependent ATPase activity+++GO:0030983///mismatched DNA binding+++GO:0005524///ATP binding	GO:0010777///meiotic mismatch repair involved in reciprocal meiotic recombination+++GO:0045143///homologous chromosome segregation+++GO:0007129///synapsis+++GO:0006298///mismatch repair+++GO:0051026///chiasma assembly
4334531	LOC4334531	mRNA	-0.327128	0.00295911					GO:0005739///mitochondrion+++GO:0005737///cytoplasm+++GO:0005634///nucleus	GO:0046872///metal ion binding+++GO:0016818///hydrolase activity, acting on acid anhydrides, in phosphorus-containing anhydrides		LOC_Os03g59580
4327035	LOC4327035	mRNA	-4.3395	0.0305986					GO:0005886///plasma membrane+++GO:0016021///integral component of membrane	GO:0005524///ATP binding+++GO:0004674///protein serine/threonine kinase activity	GO:0006468///protein phosphorylation+++GO:0048544///recognition of pollen	LOC_Os01g57510
4345574	LOC4345574	mRNA	-3.41853	0.000872242					GO:0005737///cytoplasm+++GO:0005634///nucleus	GO:0004842///ubiquitin-protein transferase activity		LOC_Os08g32060
4347076	LOC4347076	mRNA	-0.654173	0.00197325					GO:0005737///cytoplasm+++GO:0000151///ubiquitin ligase complex	GO:0031624///ubiquitin conjugating enzyme binding+++GO:0061630///ubiquitin protein ligase activity+++GO:0046872///metal ion binding	GO:0000209///protein polyubiquitination+++GO:0032436///positive regulation of proteasomal ubiquitin-dependent protein catabolic process	LOC_Os09g25190
9272566	LOC9272566	mRNA	-0.866819	1.87616e-17					GO:0005634///nucleus	GO:0046872///metal ion binding+++GO:0003677///DNA binding+++GO:0003700///DNA-binding transcription factor activity+++GO:0001210///transcriptional repressor activity, metal ion regulated sequence-specific DNA binding+++GO:0000978///RNA polymerase II proximal promoter sequence-specific DNA binding	GO:0006351///transcription, DNA-templated+++GO:0009658///chloroplast organization+++GO:0009908///flower development+++GO:0048510///regulation of timing of transition from vegetative to reproductive phase+++GO:0010228///vegetative to reproductive phase transition of meristem+++GO:0045892///negative regulation of transcription, DNA-templated+++GO:0006355///regulation of transcription, DNA-templated	LOC_Os01g15900
4330472	LOC4330472	mRNA	-0.387178	3.39565e-09					GO:0005886///plasma membrane	GO:0016208///AMP binding	GO:0006950///response to stress	LOC_Os02g47840
4345912	LOC4345912	mRNA	-1.57714	9.67073e-34								LOC_Os08g38460
4331807	LOC4331807	mRNA	-0.675349	2.27105e-07								LOC_Os03g07990
4323991	LOC4323991	mRNA	-0.398021	1.46414e-12	03010///Ribosome		M00179///Ribosome, archaea+++M00177///Ribosome, eukaryotes		GO:0005730///nucleolus+++GO:0022625///cytosolic large ribosomal subunit	GO:0003723///RNA binding+++GO:0003735///structural constituent of ribosome	GO:0000027///ribosomal large subunit assembly+++GO:0006412///translation+++GO:1902626///assembly of large subunit precursor of preribosome	LOC_Os01g33050
4330173	LOC4330173	mRNA	-0.420337	0.0083911					GO:0005634///nucleus	GO:0000978///RNA polymerase II proximal promoter sequence-specific DNA binding+++GO:0003700///DNA-binding transcription factor activity+++GO:0044212///transcription regulatory region DNA binding	GO:1904369///positive regulation of sclerenchyma cell differentiation+++GO:0045893///positive regulation of transcription, DNA-templated+++GO:1901141///regulation of lignin biosynthetic process+++GO:0006351///transcription, DNA-templated
4325416	LOC4325416	mRNA	-0.376355	8.61155e-06	00760///Nicotinate and nicotinamide metabolism+++01100///Metabolic pathways	H01929///2,4-Dienoyl-CoA reductase deficiency+++H00525///Disorders of mitochondrial fatty-acid oxidation		R00104///ATP:NAD+ 2'-phosphotransferase ATP + NAD+ <=> ADP + NADP+		GO:0003951///NAD+ kinase activity+++GO:0005524///ATP binding	GO:0006741///NADP biosynthetic process+++GO:0019674///NAD metabolic process	LOC_Os01g72690
4339960	LOC4339960	mRNA	-1.44139	0.0219423								LOC_Os06g03520
4341658	LOC4341658	mRNA	-1.85418	2.75976e-80								LOC_Os06g43810
4336073	LOC4336073	mRNA	-0.443109	2.37229e-05					GO:0005789///endoplasmic reticulum membrane+++GO:0016021///integral component of membrane			LOC_Os04g38920
4326364	LOC4326364	mRNA	-0.734259	7.87135e-13						GO:0051082///unfolded protein binding	GO:0006457///protein folding
107278342	LOC107278342	mRNA	-0.867804	5.81342e-09						GO:0043531///ADP binding
4324850	LOC4324850	mRNA	-0.726265	1.04656e-31					GO:0005634///nucleus	GO:0003700///DNA-binding transcription factor activity+++GO:0043565///sequence-specific DNA binding	GO:0006355///regulation of transcription, DNA-templated+++GO:0006351///transcription, DNA-templated	LOC_Os01g65900
4339518	LOC4339518	mRNA	-0.392167	2.70147e-07					GO:0042651///thylakoid membrane+++GO:0009507///chloroplast+++GO:0009535///chloroplast thylakoid membrane	GO:0004672///protein kinase activity+++GO:0004674///protein serine/threonine kinase activity+++GO:0005524///ATP binding	GO:0009643///photosynthetic acclimation+++GO:0042548///regulation of photosynthesis, light reaction+++GO:0007623///circadian rhythm	LOC_Os05g47560
4338669	LOC4338669	mRNA	-0.347412	1.07267e-08					GO:0005634///nucleus	GO:0003677///DNA binding+++GO:0003700///DNA-binding transcription factor activity	GO:0006355///regulation of transcription, DNA-templated	LOC_Os05g32270
4337338	LOC4337338	mRNA	-0.976921	0.00580955					GO:0005739///mitochondrion+++GO:0009507///chloroplast	GO:0015035///protein disulfide oxidoreductase activity	GO:0042246///tissue regeneration
4350940	LOC4350940	mRNA	-0.59228	1.1881e-57		H00594///Distal myopathy+++H01975///Welander distal myopathy			GO:0005634///nucleus	GO:0003729///mRNA binding	GO:0006397///mRNA processing	LOC_Os11g40510
4337765	LOC4337765	mRNA	-0.434469	6.13285e-05					GO:0005829///cytosol	GO:0016791///phosphatase activity	GO:0005975///carbohydrate metabolic process
4330440	LOC4330440	mRNA	-0.813037	1.13756e-07					GO:0009507///chloroplast+++GO:0009536///plastid	GO:0004519///endonuclease activity	GO:0008380///RNA splicing+++GO:0048564///photosystem I assembly+++GO:0006397///mRNA processing+++GO:0090305///nucleic acid phosphodiester bond hydrolysis+++GO:0045292///mRNA cis splicing, via spliceosome+++GO:0000373///Group II intron splicing
4347155	LOC4347155	mRNA	-0.772482	4.11715e-39								LOC_Os09g26620
4338654	LOC4338654	mRNA	-0.397914	3.38685e-11						GO:0046872///metal ion binding+++GO:0035091///phosphatidylinositol binding+++GO:0070300///phosphatidic acid binding+++GO:0017112///Rab guanyl-nucleotide exchange factor activity		LOC_Os05g31920
4349752	LOC4349752	mRNA	-0.817039	0.00191293					GO:0016020///membrane+++GO:0016021///integral component of membrane		GO:0007165///signal transduction	LOC_Os11g04830
4347310	LOC4347310	mRNA	-1.00589	3.44738e-07	00010///Glycolysis / Gluconeogenesis+++00500///Starch and sucrose metabolism+++01120///Microbial metabolism in diverse environments+++01110///Biosynthesis of secondary metabolites+++00520///Amino sugar and nucleotide sugar metabolism+++01100///Metabolic pathways+++01130///Biosynthesis of antibiotics+++00030///Pentose phosphate pathway+++01200///Carbon metabolism	H00664///Anemia due to disorders of glycolytic enzymes	M00004///Pentose phosphate pathway (Pentose phosphate cycle)+++M00001///Glycolysis (Embden-Meyerhof pathway), glucose => pyruvate+++M00114///Ascorbate biosynthesis, plants, glucose-6P => ascorbate	R03321///beta-D-Glucose 6-phosphate ketol-isomerase beta-D-Glucose 6-phosphate <=> beta-D-Fructose 6-phosphate+++R02739///alpha-D-Glucose 6-phosphate ketol-isomerase alpha-D-Glucose 6-phosphate <=> beta-D-Glucose 6-phosphate+++R02740///alpha-D-Glucose 6-phosphate ketol-isomerase alpha-D-Glucose 6-phosphate <=> beta-D-Fructose 6-phosphate
4334198	LOC4334198	mRNA	-0.840682	0.00906411
4332338	LOC4332338	mRNA	-0.367747	1.9822e-10					GO:0005886///plasma membrane+++GO:0005802///trans-Golgi network+++GO:0005768///endosome+++GO:0009506///plasmodesma+++GO:0005794///Golgi apparatus	GO:0005509///calcium ion binding		LOC_Os03g15740
4333065	LOC4333065	mRNA	-0.557664	9.46053e-11	04075///Plant hormone signal transduction				GO:0005634///nucleus	GO:0005515///protein binding	GO:0031347///regulation of defense response+++GO:0009611///response to wounding+++GO:2000022///regulation of jasmonic acid mediated signaling pathway	LOC_Os03g28940
4346203	LOC4346203	mRNA	-0.355954	0.0110346					GO:0005886///plasma membrane	GO:0043531///ADP binding	GO:0006952///defense response+++GO:0007165///signal transduction	LOC_Os08g43010
4348582	LOC4348582	mRNA	-0.493732	0.000617043	01110///Biosynthesis of secondary metabolites+++01200///Carbon metabolism+++00010///Glycolysis / Gluconeogenesis+++00051///Fructose and mannose metabolism+++01130///Biosynthesis of antibiotics+++04152///AMPK signaling pathway+++00030///Pentose phosphate pathway+++00680///Methane metabolism+++00052///Galactose metabolism+++03018///RNA degradation+++01120///Microbial metabolism in diverse environme…	H01762///Muscle glycogen storage disease+++H01945///Glycogen storage disease type VII+++H00069///Glycogen storage diseases (GSD)	M00345///Formaldehyde assimilation, ribulose monophosphate pathway+++M00001///Glycolysis (Embden-Meyerhof pathway), glucose => pyruvate	R03237///CTP:D-tagatose 6-phosphate 1-phosphotransferase CTP + D-Tagatose 6-phosphate <=> CDP + D-Tagatose 1,6-bisphosphate+++R03239///ITP:D-tagatose 6-phosphate 1-phosphotransferase ITP + D-Tagatose 6-phosphate <=> IDP + D-Tagatose 1,6-bisphosphate+++R00756///ATP:D-fructose-6-phosphate 1-phosphotransferase ATP + D-Fructose 6-phosphate <=> ADP + D-Fructose 1,6-bisphosphate+++R04779///ATP:D-fructo…	GO:0009507///chloroplast	GO:0003872///6-phosphofructokinase activity+++GO:0046872///metal ion binding+++GO:0005524///ATP binding	GO:0006002///fructose 6-phosphate metabolic process+++GO:0006096///glycolytic process	LOC_Os10g26570
4331330	LOC4331330	mRNA	-1.84506	7.08472e-20
4333432	LOC4333432	mRNA	-2.05409	0.00340835					GO:0005634///nucleus	GO:0003676///nucleic acid binding	GO:0006355///regulation of transcription, DNA-templated+++GO:0006351///transcription, DNA-templated	LOC_Os03g41390
4328122	LOC4328122	mRNA	-0.427954	0.0201256								LOC_Os02g02910
4340548	LOC4340548	mRNA	-0.431731	3.30987e-10						GO:0005524///ATP binding		LOC_Os06g12160
4339153	LOC4339153	mRNA	-0.372505	0.000217285	00520///Amino sugar and nucleotide sugar metabolism	H00235///Methemoglobinemia		R00100///NADH:ferricytochrome-b5 oxidoreductase NADH + 2 Ferricytochrome b5 <=> NAD+ + 2 Ferrocytochrome b5 + H+	GO:0005741///mitochondrial outer membrane+++GO:0005886///plasma membrane+++GO:0016021///integral component of membrane+++GO:0005783///endoplasmic reticulum+++GO:0009505///plant-type cell wall	GO:0004128///cytochrome-b5 reductase activity, acting on NAD(P)H	GO:0022900///electron transport chain	LOC_Os05g40990
4347266	LOC4347266	mRNA	-3.91007	1.64928e-10					GO:0005634///nucleus	GO:0003700///DNA-binding transcription factor activity+++GO:0003677///DNA binding	GO:0009873///ethylene-activated signaling pathway+++GO:0006351///transcription, DNA-templated+++GO:0048510///regulation of timing of transition from vegetative to reproductive phase+++GO:0045893///positive regulation of transcription, DNA-templated	LOC_Os09g28440
4337327	LOC4337327	mRNA	-0.611785	0.00832499						GO:0045486///naringenin 3-dioxygenase activity+++GO:0031418///L-ascorbic acid binding+++GO:0046872///metal ion binding	GO:0009813///flavonoid biosynthetic process
4335569	LOC4335569	mRNA	-1.68607	3.07521e-08						GO:0005524///ATP binding+++GO:0003678///DNA helicase activity	GO:0006310///DNA recombination+++GO:0000723///telomere maintenance+++GO:0006281///DNA repair
4349197	LOC4349197	mRNA	-0.549122	8.42779e-23	00982///Drug metabolism - cytochrome P450+++00480///Glutathione metabolism+++00980///Metabolism of xenobiotics by cytochrome P450+++00983///Drug metabolism - other enzymes	H00516///Cleft lip and/or cleft palate+++H00024///Prostate cancer		R07004///(1S)-hydroxy-(2S)-glutathionyl-1,2-dihydronaphthalene glutathione-lyase (epoxide-forming) (1S,2R)-Naphthalene 1,2-oxide + Glutathione <=> (1S)-Hydroxy-(2S)-glutathionyl-1,2-dihydronaphthalene+++R07113///1,2-dibromoethane:glutathione ethylenetransferase (episulfonium-forming) 1,2-Dibromoethane + Glutathione + H+ <=> Glutathione episulfonium ion + 2 Hydrobromic acid+++R07023///1-nitro-7-hy…	GO:0005737///cytoplasm	GO:0004364///glutathione transferase activity	GO:0006749///glutathione metabolic process+++GO:0009407///toxin catabolic process	LOC_Os10g38630
4333402	LOC4333402	mRNA	-0.381394	0.00192073					GO:0042644///chloroplast nucleoid+++GO:0009295///nucleoid+++GO:0000427///plastid-encoded plastid RNA polymerase complex	GO:0016301///kinase activity	GO:0042793///plastid transcription+++GO:0006355///regulation of transcription, DNA-templated+++GO:0009658///chloroplast organization+++GO:0009662///etioplast organization	LOC_Os03g40550
4352889	LOC4352889	mRNA	-0.363964	6.03675e-13								LOC_Os12g43940
4348196	LOC4348196	mRNA	-1.30841	0.00622313						GO:0005509///calcium ion binding		LOC_Os10g09850
4324205	LOC4324205	mRNA	-0.507753	0.000476502							GO:0007015///actin filament organization	LOC_Os01g40200
4336721	LOC4336721	mRNA	-2.99163	1.4391e-32					GO:0005634///nucleus	GO:0003700///DNA-binding transcription factor activity+++GO:0003677///DNA binding	GO:0006355///regulation of transcription, DNA-templated
4331408	LOC4331408	mRNA	-1.17382	3.55645e-20					GO:0005779///integral component of peroxisomal membrane+++GO:0005778///peroxisomal membrane+++GO:0005777///peroxisome+++GO:0016021///integral component of membrane+++GO:0016020///membrane		GO:0007031///peroxisome organization+++GO:0044375///regulation of peroxisome size+++GO:0016559///peroxisome fission
4352102	LOC4352102	mRNA	-0.444546	7.04266e-06								LOC_Os12g23780
4330515	LOC4330515	mRNA	-0.333341	1.34724e-07					GO:0005886///plasma membrane+++GO:0009506///plasmodesma+++GO:0005829///cytosol	GO:0005524///ATP binding+++GO:0000287///magnesium ion binding+++GO:0016301///kinase activity+++GO:0004749///ribose phosphate diphosphokinase activity	GO:0009116///nucleoside metabolic process+++GO:0009165///nucleotide biosynthetic process	LOC_Os02g48390
4337297	LOC4337297	mRNA	-0.597484	5.57444e-06	01100///Metabolic pathways+++00790///Folate biosynthesis	H00831///Primary dystonia+++H00167///Phenylketonuria (PKU)	M00842///Tetrahydrobiopterin biosynthesis, GTP => BH4+++M00841///Tetrahydrofolate biosynthesis, mediated by PTPS, GTP => THF+++M00843///L-threo-Tetrahydrobiopterin biosynthesis, GTP => L-threo-BH4+++M00126///Tetrahydrofolate biosynthesis, GTP => THF	R05048///2,5-diaminopyrimidine nucleoside triphosphate mutase 2,5-Diaminopyrimidine nucleoside triphosphate <=> 2,5-Diamino-6-(5'-triphosphoryl-3',4'-trihydroxy-2'-oxopentyl)-amino-4-oxopyrimidine+++R00428///GTP 8,9-hydrolase GTP + H2O <=> Formamidopyrimidine nucleoside triphosphate+++R05046///formamidopyrimidine nucleoside triphosphate amidohydrolase Formamidopyrimidine nucleoside triphosphate +…	GO:0005737///cytoplasm	GO:0042803///protein homodimerization activity+++GO:0003934///GTP cyclohydrolase I activity+++GO:0005525///GTP binding+++GO:0008270///zinc ion binding	GO:0006729///tetrahydrobiopterin biosynthetic process+++GO:0046654///tetrahydrofolate biosynthetic process+++GO:0035998///7,8-dihydroneopterin 3'-triphosphate biosynthetic process	LOC_Os04g56710
107279559	LOC107279559	mRNA	-0.546998	7.67325e-32	03430///Mismatch repair+++03460///Fanconi anemia pathway+++03030///DNA replication+++03420///Nucleotide excision repair+++03440///Homologous recombination		M00288///RPA complex			GO:0005524///ATP binding+++GO:0003678///DNA helicase activity	GO:0006281///DNA repair+++GO:0000723///telomere maintenance+++GO:0006310///DNA recombination
4325426	LOC4325426	mRNA	-0.544603	0.0156995					GO:0009507///chloroplast+++GO:0016021///integral component of membrane	GO:0004222///metalloendopeptidase activity+++GO:0005524///ATP binding		LOC_Os01g28540
4350622	LOC4350622	mRNA	-0.650421	1.14861e-12					GO:0016021///integral component of membrane+++GO:0009507///chloroplast+++GO:0009535///chloroplast thylakoid membrane		GO:0010190///cytochrome b6f complex assembly	LOC_Os11g32320
9270987	LOC9270987	mRNA	-1.16412	0.00887384
4346740	LOC4346740	mRNA	-0.309819	0.00246707					GO:0005886///plasma membrane+++GO:0016021///integral component of membrane	GO:0004674///protein serine/threonine kinase activity+++GO:0005524///ATP binding		LOC_Os09g15700
4327760	LOC4327760	mRNA	-1.08698	3.06283e-10					GO:0016021///integral component of membrane+++GO:0016020///membrane			LOC_Os01g20780
4348108	LOC4348108	mRNA	-0.967878	1.66897e-22								LOC_Os10g05730
4336057	LOC4336057	mRNA	-1.79241	0.00042459					GO:0005634///nucleus	GO:0046983///protein dimerization activity+++GO:0003700///DNA-binding transcription factor activity+++GO:0000977///RNA polymerase II regulatory region sequence-specific DNA binding	GO:0045944///positive regulation of transcription by RNA polymerase II+++GO:0006351///transcription, DNA-templated
4339366	LOC4339366	mRNA	-0.774459	1.45574e-22								LOC_Os05g44900
4344338	LOC4344338	mRNA	-1.19247	0.000455816					GO:0005634///nucleus	GO:0005516///calmodulin binding		LOC_Os07g48710
4348531	LOC4348531	mRNA	-2.35406	2.31526e-24	04075///Plant hormone signal transduction						GO:0031347///regulation of defense response+++GO:2000022///regulation of jasmonic acid mediated signaling pathway+++GO:0009611///response to wounding	LOC_Os10g25230
4350316	LOC4350316	mRNA	-0.502129	9.19276e-11						GO:0003676///nucleic acid binding+++GO:0008270///zinc ion binding
4340227	LOC4340227	mRNA	-0.346032	1.95442e-10	04120///Ubiquitin mediated proteolysis+++04630///Jak-STAT signaling pathway					GO:0019789///SUMO transferase activity+++GO:0008270///zinc ion binding		LOC_Os06g06870
4351526	LOC4351526	mRNA	-0.319026	0.0218648	04075///Plant hormone signal transduction				GO:0005634///nucleus	GO:0043565///sequence-specific DNA binding+++GO:0003700///DNA-binding transcription factor activity	GO:0006351///transcription, DNA-templated+++GO:0006952///defense response	LOC_Os12g05660
4347336	LOC4347336	mRNA	-0.437324	0.000293633	00940///Phenylpropanoid biosynthesis+++01110///Biosynthesis of secondary metabolites+++01100///Metabolic pathways			R03919///Donor:hydrogen-peroxide oxidoreductase Sinapyl alcohol <=> Syringyl lignin+++R04007///Donor:hydrogen-peroxide oxidoreductase 4-Coumaryl alcohol <=> p-Hydroxyphenyl lignin+++R07443///donor:hydrogen-peroxide oxidoreductase 5-Hydroxyconiferyl alcohol <=> 5-Hydroxy-guaiacyl lignin+++R00602///methanol:hydrogen-peroxide oxidoreductase Methanol + Hydrogen peroxide <=> Formaldehyde + 2 H2O+++R02…	GO:0005773///vacuole+++GO:0005576///extracellular region+++GO:0005829///cytosol+++GO:0009505///plant-type cell wall	GO:0046872///metal ion binding+++GO:0020037///heme binding+++GO:0004601///peroxidase activity	GO:0042744///hydrogen peroxide catabolic process+++GO:0009809///lignin biosynthetic process+++GO:0010228///vegetative to reproductive phase transition of meristem+++GO:0006979///response to oxidative stress	LOC_Os09g29490
4344708	LOC4344708	mRNA	-1.10292	0.0172766	01100///Metabolic pathways+++00500///Starch and sucrose metabolism+++00052///Galactose metabolism			R06088///Sucrose + H2O <=> beta-D-Fructose + alpha-D-Glucose+++R00802///sucrose alpha-glucohydrolase Sucrose + H2O <=> beta-D-Fructose + alpha-D-Glucose+++R03921///Sucrose 6-phosphate fructohydrolase Sucrose 6-phosphate + H2O <=> D-Fructose + D-Glucose 6-phosphate+++R03635///Stachyose fructohydrolase Stachyose + H2O <=> D-Gal alpha 1->6D-Gal alpha 1->6D-Glucose + D-Fructose+++R02410///Raffinose f…	GO:0005618///cell wall+++GO:0048046///apoplast	GO:0004564///beta-fructofuranosidase activity	GO:0005975///carbohydrate metabolic process	LOC_Os08g06210
4344086	LOC4344086	mRNA	-0.945485	2.28875e-26					GO:0005789///endoplasmic reticulum membrane+++GO:0016021///integral component of membrane+++GO:0005634///nucleus	GO:0003677///DNA binding+++GO:0003700///DNA-binding transcription factor activity	GO:0006351///transcription, DNA-templated+++GO:0006986///response to unfolded protein+++GO:0034976///response to endoplasmic reticulum stress	LOC_Os07g44950
4329464	LOC4329464	mRNA	-0.787558	8.93775e-16					GO:0005887///integral component of plasma membrane+++GO:0005886///plasma membrane+++GO:0016020///membrane+++GO:0016021///integral component of membrane	GO:0051119///sugar transmembrane transporter activity	GO:0034219///carbohydrate transmembrane transport+++GO:0008643///carbohydrate transport	LOC_Os02g30910
4333225	LOC4333225	mRNA	-0.354828	0.0043586					GO:0005634///nucleus	GO:0003700///DNA-binding transcription factor activity+++GO:0043565///sequence-specific DNA binding	GO:0031347///regulation of defense response+++GO:0006351///transcription, DNA-templated	LOC_Os03g33012
4329751	LOC4329751	mRNA	-0.515064	3.16557e-07		H01891///Autosomal recessive spinocerebellar ataxias+++H01657///Nephrotic syndrome+++H00999///Coenzyme Q10 deficiency			GO:0016021///integral component of membrane+++GO:0009941///chloroplast envelope+++GO:0009507///chloroplast+++GO:0031969///chloroplast membrane	GO:0005524///ATP binding+++GO:0016301///kinase activity+++GO:0005215///transporter activity	GO:0046686///response to cadmium ion+++GO:0046467///membrane lipid biosynthetic process+++GO:0007623///circadian rhythm+++GO:0055072///iron ion homeostasis+++GO:0009644///response to high light intensity+++GO:0034599///cellular response to oxidative stress+++GO:0006979///response to oxidative stress+++GO:1901031///regulation of response to reactive oxygen species+++GO:0010150///leaf senescence+++…	LOC_Os02g36570
4351684	LOC4351684	mRNA	-0.585805	5.07639e-11	01130///Biosynthesis of antibiotics+++01110///Biosynthesis of secondary metabolites+++01100///Metabolic pathways+++00640///Propanoate metabolism+++00280///Valine, leucine and isoleucine degradation	H00172///Maple syrup urine disease (MSUD)	M00036///Leucine degradation, leucine => acetoacetate + acetyl-CoA	R07601///4-Methyl-2-oxopentanoate + Thiamin diphosphate <=> 3-Methyl-1-hydroxybutyl-ThPP + CO2+++R07599///3-Methyl-2-oxobutanoic acid + Thiamin diphosphate <=> 2-Methyl-1-hydroxypropyl-ThPP + CO2+++R01702///4-methyl-2-oxopentanoate:[dihydrolipoyllysine-residue (2-methylpropanoyl)transferase] lipoyllysine 2-oxidoreductase (decarboxylating, acceptor-2-methylpropanoylating) 4-Methyl-2-oxopentanoate …	GO:0005759///mitochondrial matrix+++GO:0005739///mitochondrion	GO:0046872///metal ion binding+++GO:0003863///3-methyl-2-oxobutanoate dehydrogenase (2-methylpropanoyl-transferring) activity	GO:0043617///cellular response to sucrose starvation+++GO:0009744///response to sucrose+++GO:0009646///response to absence of light	LOC_Os12g08260
9270212	LOC9270212	mRNA	-0.326093	6.83628e-05					GO:0016021///integral component of membrane			LOC_Os05g04150
4337775	LOC4337775	mRNA	-0.359051	0.0214448								LOC_Os05g05140
4325900	LOC4325900	mRNA	-0.335302	5.36745e-10					GO:0009506///plasmodesma+++GO:0005794///Golgi apparatus+++GO:0000148///1,3-beta-D-glucan synthase complex+++GO:0016021///integral component of membrane+++GO:0005886///plasma membrane	GO:0003843///1,3-beta-D-glucan synthase activity	GO:0006952///defense response+++GO:0050832///defense response to fungus+++GO:0009863///salicylic acid mediated signaling pathway+++GO:0010150///leaf senescence+++GO:0009870///defense response signaling pathway, resistance gene-dependent+++GO:0052542///defense response by callose deposition+++GO:0052544///defense response by callose deposition in cell wall+++GO:0006075///(1->3)-beta-D-glucan biosy…
4341607	LOC4341607	mRNA	-0.593831	8.51208e-12					GO:0005634///nucleus	GO:0044212///transcription regulatory region DNA binding+++GO:0000981///DNA-binding transcription factor activity, RNA polymerase II-specific+++GO:0001135///RNA polymerase II transcription regulator recruiting activity+++GO:0043565///sequence-specific DNA binding+++GO:0003700///DNA-binding transcription factor activity	GO:0042742///defense response to bacterium+++GO:0009651///response to salt stress+++GO:0010929///positive regulation of auxin mediated signaling pathway+++GO:0009737///response to abscisic acid+++GO:0009733///response to auxin+++GO:0009739///response to gibberellin+++GO:0006357///regulation of transcription by RNA polymerase II+++GO:2000031///regulation of salicylic acid mediated signaling pathwa…	LOC_Os06g43090
4338230	LOC4338230	mRNA	-1.29508	1.92016e-62					GO:0016021///integral component of membrane+++GO:0005886///plasma membrane	GO:0005524///ATP binding+++GO:0004674///protein serine/threonine kinase activity
4348876	LOC4348876	mRNA	-0.429893	1.30852e-08	00600///Sphingolipid metabolism+++00511///Other glycan degradation+++01100///Metabolic pathways			R01498///D-Glucosyl-N-acylsphingosine glucohydrolase beta-D-Glucosyl-(1<->1)-ceramide + H2O <=> D-Glucose + N-Acylsphingosine	GO:0016020///membrane	GO:0004348///glucosylceramidase activity	GO:0006680///glucosylceramide catabolic process	LOC_Os10g33420
4348969	LOC4348969	mRNA	-0.400727	0.00193865								LOC_Os10g34810
4348747	LOC4348747	mRNA	-0.568833	0.00800898
4327479	LOC4327479	mRNA	-0.30606	0.000559029	01100///Metabolic pathways+++01230///Biosynthesis of amino acids+++00920///Sulfur metabolism+++01110///Biosynthesis of secondary metabolites+++01130///Biosynthesis of antibiotics+++01120///Microbial metabolism in diverse environments+++00270///Cysteine and methionine metabolism+++01200///Carbon metabolism		M00021///Cysteine biosynthesis, serine => cysteine	R04859///O3-acetyl-L-serine:thiosulfate 2-amino-2-carboxyethyltransferase (reducing, L-cysteine-forming); O3-acetyl-L-serine O-Acetyl-L-serine + Thiosulfate + Thioredoxin + H+ <=> L-Cysteine + Sulfite + Thioredoxin disulfide + Acetate+++R03601///O3-Acetyl-L-serine acetate-lyase (adding hydrogen sulfide) O-Acetyl-L-serine + Hydrogen selenide <=> L-Selenocysteine + Acetate+++R00897///O3-acetyl-L-se…	GO:0009507///chloroplast+++GO:0031977///thylakoid lumen+++GO:0009543///chloroplast thylakoid lumen	GO:0030170///pyridoxal phosphate binding+++GO:0004124///cysteine synthase activity	GO:0015979///photosynthesis+++GO:0009643///photosynthetic acclimation+++GO:0010310///regulation of hydrogen peroxide metabolic process+++GO:0090322///regulation of superoxide metabolic process+++GO:0006535///cysteine biosynthetic process from serine	LOC_Os01g59920
4344075	LOC4344075	mRNA	-0.420032	5.41746e-12					GO:0005783///endoplasmic reticulum+++GO:0005794///Golgi apparatus+++GO:0030008///TRAPP complex		GO:0048193///Golgi vesicle transport	LOC_Os07g44790
4325023	LOC4325023	mRNA	-2.58844	8.73052e-36					GO:0000145///exocyst		GO:0006887///exocytosis+++GO:0015031///protein transport	LOC_Os01g67810
4343432	LOC4343432	mRNA	-1.96888	2.44367e-08	00945///Stilbenoid, diarylheptanoid and gingerol biosynthesis+++01110///Biosynthesis of secondary metabolites			R10233///4-coumaroyl-CoA:malonyl-CoA 4-coumaryltransferase (bisdemethoxycurcumin-forming) 2 p-Coumaroyl-CoA + Malonyl-CoA + H2O <=> 3 CoA + Bisdemethoxycurcumin + 2 CO2		GO:0102452///bisdemethoxycurcumin synthase activity+++GO:0042802///identical protein binding	GO:0009813///flavonoid biosynthetic process	LOC_Os07g34260
4325351	LOC4325351	mRNA	-0.443196	1.39632e-06								LOC_Os01g08510
4332475	LOC4332475	mRNA	-0.919573	7.26312e-21	04016///MAPK signaling pathway - plant				GO:0005634///nucleus+++GO:0005737///cytoplasm	GO:0004672///protein kinase activity+++GO:0005515///protein binding+++GO:0005524///ATP binding+++GO:0016301///kinase activity+++GO:0004674///protein serine/threonine kinase activity+++GO:0004707///MAP kinase activity+++GO:0016740///transferase activity+++GO:0000166///nucleotide binding	GO:0042742///defense response to bacterium+++GO:1901002///positive regulation of response to salt stress+++GO:0010229///inflorescence development+++GO:0050832///defense response to fungus+++GO:0010200///response to chitin+++GO:0010224///response to UV-B+++GO:0050826///response to freezing+++GO:0000165///MAPK cascade+++GO:0016310///phosphorylation+++GO:0048481///plant ovule development+++GO:000961…	LOC_Os03g17700
4331153	LOC4331153	mRNA	-0.367532	9.8628e-06
4334605	LOC4334605	mRNA	-0.349745	1.62052e-08					GO:0005886///plasma membrane	GO:0005524///ATP binding+++GO:0004675///transmembrane receptor protein serine/threonine kinase activity	GO:0045087///innate immune response+++GO:0006468///protein phosphorylation+++GO:0007166///cell surface receptor signaling pathway	LOC_Os03g60710
9267387	LOC9267387	mRNA	-0.815529	1.031e-13								LOC_Os02g54130
4328449	LOC4328449	mRNA	-0.317351	0.00229434					GO:0005622///intracellular	GO:0008270///zinc ion binding		LOC_Os02g07650
4330129	LOC4330129	mRNA	-0.504814	1.39116e-05					GO:0005886///plasma membrane+++GO:0005634///nucleus+++GO:0005783///endoplasmic reticulum+++GO:0005829///cytosol+++GO:0016021///integral component of membrane+++GO:0005789///endoplasmic reticulum membrane+++GO:0032586///protein storage vacuole membrane+++GO:0000326///protein storage vacuole		GO:0006605///protein targeting+++GO:0046907///intracellular transport+++GO:0016032///viral process	LOC_Os02g42940
4343452	LOC4343452	mRNA	-4.34251	0.0279915								LOC_Os07g34690
4339792	LOC4339792	mRNA	-0.314643	4.72785e-06	04112///Cell cycle - Caulobacter+++04212///Longevity regulating pathway - worm	H02095///Perrault syndrome			GO:0009534///chloroplast thylakoid+++GO:0009570///chloroplast stroma+++GO:0009840///chloroplastic endopeptidase Clp complex+++GO:0009507///chloroplast+++GO:0009941///chloroplast envelope+++GO:0009532///plastid stroma	GO:0003723///RNA binding+++GO:0004252///serine-type endopeptidase activity	GO:0009658///chloroplast organization+++GO:0006364///rRNA processing+++GO:0006396///RNA processing	LOC_Os05g51450
4328512	LOC4328512	mRNA	-2.59388	1.54646e-66					GO:0005634///nucleus	GO:0043565///sequence-specific DNA binding+++GO:1990841///promoter-specific chromatin binding+++GO:0003700///DNA-binding transcription factor activity	GO:0031347///regulation of defense response+++GO:0009623///response to parasitic fungus+++GO:0002238///response to molecule of fungal origin+++GO:0045892///negative regulation of transcription, DNA-templated+++GO:0009740///gibberellic acid mediated signaling pathway+++GO:0009737///response to abscisic acid+++GO:0009409///response to cold+++GO:0006952///defense response+++GO:0009685///gibberellin …	LOC_Os02g08440
4327202	LOC4327202	mRNA	-0.892675	1.54464e-10
4348725	LOC4348725	mRNA	-0.433031	0.0018743					GO:0010009///cytoplasmic side of endosome membrane+++GO:0031901///early endosome membrane+++GO:0005829///cytosol+++GO:0005768///endosome+++GO:0005783///endoplasmic reticulum+++GO:0005886///plasma membrane+++GO:0005769///early endosome	GO:0003924///GTPase activity+++GO:0005525///GTP binding	GO:0006897///endocytosis+++GO:0045022///early endosome to late endosome transport	LOC_Os10g30520
4335358	LOC4335358	mRNA	-0.728777	1.87309e-21								LOC_Os04g20920
9267434	LOC9267434	mRNA	-1.56572	8.56916e-06					GO:0005634///nucleus	GO:0003677///DNA binding	GO:0006355///regulation of transcription, DNA-templated+++GO:0006351///transcription, DNA-templated
107278557	LOC107278557	mRNA	-0.671185	3.12684e-06					GO:0016021///integral component of membrane
4331848	LOC4331848	mRNA	-1.11948	1.08538e-33					GO:0005634///nucleus	GO:0003677///DNA binding+++GO:0003700///DNA-binding transcription factor activity	GO:0006351///transcription, DNA-templated+++GO:0001666///response to hypoxia+++GO:0010468///regulation of gene expression+++GO:0009873///ethylene-activated signaling pathway	LOC_Os03g08500
9267736	LOC9267736	mRNA	-2.31059	0.00769442	04341///Hedgehog signaling pathway - fly+++04340///Hedgehog signaling pathway		M00384///Cul3-SPOP complex					LOC_Os10g29150
4333025	LOC4333025	mRNA	-0.653011	1.24427e-51						GO:0046983///protein dimerization activity		LOC_Os03g27390
4335011	LOC4335011	mRNA	-0.464642	0.00147338								LOC_Os04g05010
4336288	LOC4336288	mRNA	-0.568665	0.0420359					GO:0005634///nucleus	GO:0008270///zinc ion binding	GO:0009416///response to light stimulus+++GO:0009909///regulation of flower development	LOC_Os04g42020
4348739	LOC4348739	mRNA	-0.453038	8.22736e-08								LOC_Os10g30750
4324028	LOC4324028	mRNA	-1.06976	1.67954e-43							GO:0009739///response to gibberellin	LOC_Os01g32770
4334169	LOC4334169	mRNA	-0.571093	4.89237e-27	00040///Pentose and glucuronate interconversions+++01100///Metabolic pathways+++00053///Ascorbate and aldarate metabolism+++00520///Amino sugar and nucleotide sugar metabolism		M00014///Glucuronate pathway (uronate pathway)+++M00129///Ascorbate biosynthesis, animals, glucose-1P => ascorbate+++M00361///Nucleotide sugar biosynthesis, eukaryotes+++M00362///Nucleotide sugar biosynthesis, prokaryotes	R00286///UDP-glucose:NAD+ 6-oxidoreductase UDP-glucose + H2O + 2 NAD+ <=> UDP-glucuronate + 2 NADH + 2 H+	GO:0005634///nucleus+++GO:0005829///cytosol	GO:0051287///NAD binding+++GO:0016616///oxidoreductase activity, acting on the CH-OH group of donors, NAD or NADP as acceptor+++GO:0016491///oxidoreductase activity+++GO:0003979///UDP-glucose 6-dehydrogenase activity	GO:0055114///oxidation-reduction process+++GO:0006024///glycosaminoglycan biosynthetic process+++GO:0006065///UDP-glucuronate biosynthetic process	LOC_Os03g55070
4329388	LOC4329388	mRNA	-0.450109	4.99521e-10	04915///Estrogen signaling pathway	H01646///Major depressive disorder (MDD)			GO:0016021///integral component of membrane	GO:0005516///calmodulin binding+++GO:0003755///peptidyl-prolyl cis-trans isomerase activity		LOC_Os02g28980
4339933	LOC4339933	mRNA	-0.304818	0.000407767					GO:0005739///mitochondrion	GO:0005524///ATP binding+++GO:0046872///metal ion binding+++GO:0051082///unfolded protein binding+++GO:0031072///heat shock protein binding	GO:0000740///nuclear membrane fusion+++GO:0051085///chaperone cofactor-dependent protein refolding+++GO:0009558///embryo sac cellularization+++GO:0010198///synergid death+++GO:0009408///response to heat+++GO:0009553///embryo sac development+++GO:0010197///polar nucleus fusion	LOC_Os06g02620
4328771	LOC4328771	mRNA	-0.341099	0.00011095		H01119///Prolidase deficiency (PD)				GO:0030145///manganese ion binding+++GO:0004177///aminopeptidase activity		LOC_Os02g13140
4326393	LOC4326393	mRNA	-0.901082	3.79927e-18						GO:0061630///ubiquitin protein ligase activity	GO:0043161///proteasome-mediated ubiquitin-dependent protein catabolic process+++GO:0000209///protein polyubiquitination	LOC_Os01g74040
112938725	LOC112938725	mRNA	-1.37772	3.23558e-14						GO:0005524///ATP binding+++GO:0003678///DNA helicase activity	GO:0006310///DNA recombination+++GO:0000723///telomere maintenance+++GO:0006281///DNA repair
4337345	LOC4337345	mRNA	-0.452581	0.00592487					GO:0005737///cytoplasm	GO:0008474///palmitoyl-(protein) hydrolase activity+++GO:0052689///carboxylic ester hydrolase activity	GO:0002084///protein depalmitoylation+++GO:0006631///fatty acid metabolic process
4338633	LOC4338633	mRNA	-2.30663	3.03972e-75	04626///Plant-pathogen interaction					GO:0005509///calcium ion binding+++GO:0046872///metal ion binding		LOC_Os05g31620
4324827	LOC4324827	mRNA	-0.425059	0.00646157						GO:0004601///peroxidase activity		LOC_Os01g63620
4337347	LOC4337347	mRNA	-0.57639	2.12272e-21	00270///Cysteine and methionine metabolism+++01100///Metabolic pathways		M00034///Methionine salvage pathway	R04143///ATP:S5-methyl-5-thio-D-ribose 1-phosphotransferase ATP + 5-Methylthio-D-ribose <=> ADP + S-Methyl-5-thio-D-ribose 1-phosphate		GO:0016301///kinase activity+++GO:0016740///transferase activity+++GO:0005524///ATP binding+++GO:0000166///nucleotide binding+++GO:0046522///S-methyl-5-thioribose kinase activity	GO:0008652///cellular amino acid biosynthetic process+++GO:0019509///L-methionine salvage from methylthioadenosine+++GO:0016310///phosphorylation+++GO:0009086///methionine biosynthetic process	LOC_Os04g57400
4337275	LOC4337275	mRNA	-0.309625	4.26609e-05							GO:0050832///defense response to fungus
4344922	LOC4344922	mRNA	-0.355445	0.000381462						GO:0043531///ADP binding		LOC_Os08g10430
4334644	LOC4334644	mRNA	-1.98303	3.76797e-10								LOC_Os03g61160
4351676	LOC4351676	mRNA	-2.04578	8.33744e-81					GO:0005886///plasma membrane+++GO:0031965///nuclear membrane+++GO:0016021///integral component of membrane	GO:0015293///symporter activity+++GO:0015171///amino acid transmembrane transporter activity+++GO:0015174///basic amino acid transmembrane transporter activity	GO:0015802///basic amino acid transport+++GO:0003333///amino acid transmembrane transport+++GO:0015809///arginine transport	LOC_Os12g08130
4340377	LOC4340377	mRNA	-1.29065	3.0716e-05					GO:0016021///integral component of membrane	GO:0061630///ubiquitin protein ligase activity	GO:0043161///proteasome-mediated ubiquitin-dependent protein catabolic process	LOC_Os06g09310
4327336	LOC4327336	mRNA	-0.392792	9.82742e-24					GO:0005634///nucleus+++GO:0031380///nuclear RNA-directed RNA polymerase complex	GO:0016740///transferase activity+++GO:0016779///nucleotidyltransferase activity+++GO:0003968///RNA-directed 5'-3' RNA polymerase activity+++GO:0003723///RNA binding	GO:0070919///production of siRNA involved in chromatin silencing by small RNA+++GO:0001172///transcription, RNA-templated+++GO:0030422///production of siRNA involved in RNA interference+++GO:0031047///gene silencing by RNA
4341662	LOC4341662	mRNA	-1.05943	3.36045e-27								LOC_Os06g43870
4336001	LOC4336001	mRNA	-0.320729	0.0207096								LOC_Os04g37790
107279829	LOC107279829	mRNA	-0.518707	1.88267e-14		H00436///Osteopetrosis			GO:0016020///membrane+++GO:0016021///integral component of membrane+++GO:0009705///plant-type vacuole membrane	GO:0005247///voltage-gated chloride channel activity	GO:0006821///chloride transport+++GO:0006811///ion transport+++GO:1902476///chloride transmembrane transport+++GO:0055085///transmembrane transport
4337963	LOC4337963	mRNA	-0.369019	0.0015937					GO:0016021///integral component of membrane+++GO:0016020///membrane+++GO:0005887///integral component of plasma membrane	GO:0005452///inorganic anion exchanger activity+++GO:0080139///borate efflux transmembrane transporter activity	GO:0035445///borate transmembrane transport+++GO:0046713///borate transport+++GO:0051453///regulation of intracellular pH+++GO:0006820///anion transport
4330501	LOC4330501	mRNA	-0.721098	5.86894e-25					GO:0016021///integral component of membrane+++GO:0005794///Golgi apparatus+++GO:0000139///Golgi membrane	GO:0048531///beta-1,3-galactosyltransferase activity	GO:0045489///pectin biosynthetic process+++GO:0071555///cell wall organization+++GO:0042546///cell wall biogenesis	LOC_Os02g48190
4336249	LOC4336249	mRNA	-0.516323	0.0188671					GO:0016021///integral component of membrane	GO:0022857///transmembrane transporter activity		LOC_Os04g41450
4347182	LOC4347182	mRNA	-0.600833	4.9197e-16	00230///Purine metabolism			R00429///ATP:GTP 3'-diphosphotransferase ATP + GTP <=> AMP + Guanosine 3'-diphosphate 5'-triphosphate	GO:0009536///plastid+++GO:0009507///chloroplast	GO:0008728///GTP diphosphokinase activity+++GO:0016740///transferase activity+++GO:0000166///nucleotide binding+++GO:0005524///ATP binding+++GO:0005525///GTP binding+++GO:0016301///kinase activity	GO:0016310///phosphorylation+++GO:0015969///guanosine tetraphosphate metabolic process	LOC_Os09g27050
4336701	LOC4336701	mRNA	-1.07099	0.00131999					GO:0005634///nucleus+++GO:0005737///cytoplasm	GO:0003677///DNA binding+++GO:0043565///sequence-specific DNA binding+++GO:0000978///RNA polymerase II proximal promoter sequence-specific DNA binding+++GO:0003700///DNA-binding transcription factor activity	GO:0061408///positive regulation of transcription from RNA polymerase II promoter in response to heat stress+++GO:0006355///regulation of transcription, DNA-templated+++GO:0034605///cellular response to heat
4327518	LOC4327518	mRNA	-1.91441	4.41831e-06	04626///Plant-pathogen interaction+++04016///MAPK signaling pathway - plant				GO:0005634///nucleus	GO:0003700///DNA-binding transcription factor activity+++GO:0043565///sequence-specific DNA binding+++GO:0003677///DNA binding	GO:0009788///negative regulation of abscisic acid-activated signaling pathway+++GO:0009738///abscisic acid-activated signaling pathway+++GO:0045893///positive regulation of transcription, DNA-templated+++GO:0009737///response to abscisic acid+++GO:0009740///gibberellic acid mediated signaling pathway+++GO:0009938///negative regulation of gibberellic acid mediated signaling pathway+++GO:0009739///…	LOC_Os01g61080
4347242	LOC4347242	mRNA	-0.411565	3.13054e-11					GO:0009507///chloroplast	GO:0008483///transaminase activity+++GO:0016740///transferase activity+++GO:0016829///lyase activity+++GO:0003824///catalytic activity+++GO:0030170///pyridoxal phosphate binding	GO:0009058///biosynthetic process	LOC_Os09g28050
4331787	LOC4331787	mRNA	-0.521829	5.62596e-11								LOC_Os03g07790
4331683	LOC4331683	mRNA	-0.601226	2.78097e-66						GO:0003723///RNA binding		LOC_Os03g06240
4343597	LOC4343597	mRNA	-1.37434	3.89585e-37								LOC_Os07g37400
4348649	LOC4348649	mRNA	-0.329586	0.0470651								LOC_Os10g28410
4329761	LOC4329761	mRNA	-0.316728	0.000597404	01100///Metabolic pathways+++00513///Various types of N-glycan biosynthesis				GO:0016021///integral component of membrane+++GO:0000139///Golgi membrane+++GO:0005794///Golgi apparatus	GO:0010488///UDP-galactose:N-glycan beta-1,3-galactosyltransferase activity+++GO:0030246///carbohydrate binding	GO:0006486///protein glycosylation+++GO:0010493///Lewis a epitope biosynthetic process
107278601	LOC107278601	mRNA	-2.46534	8.41178e-24					GO:0016021///integral component of membrane
4330922	LOC4330922	mRNA	-1.01884	6.44531e-50						GO:0016787///hydrolase activity	GO:0016042///lipid catabolic process	LOC_Os02g54010
4334969	LOC4334969	mRNA	-0.920078	4.52754e-42						GO:0008289///lipid binding		LOC_Os04g02910
4325081	LOC4325081	mRNA	-0.574869	2.75904e-16					GO:0016021///integral component of membrane			LOC_Os01g65520
4338957	LOC4338957	mRNA	-0.37988	4.15153e-08					GO:0005634///nucleus	GO:0003677///DNA binding	GO:0006351///transcription, DNA-templated+++GO:0009908///flower development+++GO:0048262///determination of dorsal/ventral asymmetry+++GO:0006355///regulation of transcription, DNA-templated	LOC_Os05g37730
4328451	LOC4328451	mRNA	-0.462415	1.20769e-08					GO:0031969///chloroplast membrane	GO:0016705///oxidoreductase activity, acting on paired donors, with incorporation or reduction of molecular oxygen+++GO:0005506///iron ion binding+++GO:0020037///heme binding+++GO:0004497///monooxygenase activity		LOC_Os02g07680
9266492	LOC9266492	mRNA	-1.26076	0.00915479								LOC_Os03g07960
4327469	LOC4327469	mRNA	-1.31527	1.21265e-16								LOC_Os01g62810
9272301	LOC9272301	mRNA	-1.51494	5.14554e-48	03015///mRNA surveillance pathway				GO:0005634///nucleus+++GO:0016021///integral component of membrane	GO:0003723///RNA binding+++GO:0004652///polynucleotide adenylyltransferase activity	GO:0031123///RNA 3'-end processing+++GO:0043631///RNA polyadenylation	LOC_Os03g19920
4347127	LOC4347127	mRNA	-0.335699	5.40702e-06	03022///Basal transcription factors				GO:0005634///nucleus		GO:0006355///regulation of transcription, DNA-templated+++GO:0006352///DNA-templated transcription, initiation
4326729	LOC4326729	mRNA	-0.756211	3.22639e-19					GO:0005634///nucleus	GO:0003700///DNA-binding transcription factor activity+++GO:0003677///DNA binding	GO:0006351///transcription, DNA-templated	LOC_Os01g12440
4336427	LOC4336427	mRNA	-1.19336	0.0118526								LOC_Os04g44100
4326677	LOC4326677	mRNA	-0.866328	0.00426236					GO:0005886///plasma membrane+++GO:0016021///integral component of membrane	GO:0008308///voltage-gated anion channel activity	GO:0006873///cellular ion homeostasis
4333714	LOC4333714	mRNA	-0.957502	5.85396e-15	04141///Protein processing in endoplasmic reticulum				GO:0016021///integral component of membrane			LOC_Os03g47500
9266409	LOC9266409	mRNA	-1.35454	2.86888e-16								LOC_Os09g24870
4342410	LOC4342410	mRNA	-0.482565	2.28398e-23					GO:0005886///plasma membrane+++GO:0005829///cytosol+++GO:0009536///plastid+++GO:0005634///nucleus+++GO:0005737///cytoplasm	GO:0016301///kinase activity+++GO:0016740///transferase activity+++GO:0000166///nucleotide binding+++GO:0005524///ATP binding+++GO:0004674///protein serine/threonine kinase activity+++GO:0004672///protein kinase activity	GO:0007165///signal transduction+++GO:0016310///phosphorylation+++GO:0006468///protein phosphorylation+++GO:0010118///stomatal movement+++GO:0009414///response to water deprivation+++GO:1990573///potassium ion import across plasma membrane+++GO:0035556///intracellular signal transduction+++GO:0007584///response to nutrient	LOC_Os07g05610
4325987	LOC4325987	mRNA	-0.498166	0.000156864					GO:0005634///nucleus	GO:0003677///DNA binding	GO:0006351///transcription, DNA-templated+++GO:0006355///regulation of transcription, DNA-templated	LOC_Os01g03660
4350823	LOC4350823	mRNA	-1.75986	0.00226207						GO:0004518///nuclease activity	GO:0050832///defense response to fungus+++GO:0042742///defense response to bacterium	LOC_Os11g37970
4336629	LOC4336629	mRNA	-0.916724	0.0382373	00908///Zeatin biosynthesis			R07260///UDP-glucose:cis-zeatin O-beta-D-glucosyltransferase UDP-glucose + cis-Zeatin <=> UDP + O-beta-D-Glucopyranosyl-cis-zeatin	GO:0043231///intracellular membrane-bounded organelle	GO:0050502///cis-zeatin O-beta-D-glucosyltransferase activity	GO:0006486///protein glycosylation+++GO:0080036///regulation of cytokinin-activated signaling pathway+++GO:0010817///regulation of hormone levels+++GO:0009690///cytokinin metabolic process	LOC_Os04g46980
4346857	LOC4346857	mRNA	-0.552813	1.69301e-14	00310///Lysine degradation+++04211///Longevity regulating pathway	H00907///Kleefstra syndrome		R04867///S-adenosyl-L-methionine:cytochrome-c-L-lysine N6-methyltransferase S-Adenosyl-L-methionine + Protein N6,N6-dimethyl-L-lysine <=> S-Adenosyl-L-homocysteine + Protein N6,N6,N6-trimethyl-L-lysine+++R03938///S-Adenosyl-L-methionine:histone-L-lysine N6-methyltransferase S-Adenosyl-L-methionine + Histone-L-lysine <=> S-Adenosyl-L-homocysteine + Histone N6-methyl-L-lysine+++R04866///S-adenosyl-…	GO:0000775///chromosome, centromeric region+++GO:0005634///nucleus	GO:0042054///histone methyltransferase activity+++GO:0018024///histone-lysine N-methyltransferase activity+++GO:0008270///zinc ion binding	GO:0031048///chromatin silencing by small RNA+++GO:0010200///response to chitin+++GO:0016571///histone methylation+++GO:0040029///regulation of gene expression, epigenetic	LOC_Os09g19830
4337376	LOC4337376	mRNA	-1.36541	3.62698e-13								LOC_Os04g57760
4327052	LOC4327052	mRNA	-2.46056	5.43738e-09	01110///Biosynthesis of secondary metabolites+++01100///Metabolic pathways+++00940///Phenylpropanoid biosynthesis			R04007///Donor:hydrogen-peroxide oxidoreductase 4-Coumaryl alcohol <=> p-Hydroxyphenyl lignin+++R03919///Donor:hydrogen-peroxide oxidoreductase Sinapyl alcohol <=> Syringyl lignin+++R00602///methanol:hydrogen-peroxide oxidoreductase Methanol + Hydrogen peroxide <=> Formaldehyde + 2 H2O+++R07443///donor:hydrogen-peroxide oxidoreductase 5-Hydroxyconiferyl alcohol <=> 5-Hydroxy-guaiacyl lignin+++R02…	GO:0009505///plant-type cell wall+++GO:0005576///extracellular region+++GO:0009506///plasmodesma	GO:0004601///peroxidase activity+++GO:0046872///metal ion binding+++GO:0020037///heme binding	GO:0009664///plant-type cell wall organization+++GO:0006979///response to oxidative stress+++GO:0042744///hydrogen peroxide catabolic process	LOC_Os01g57730
4345008	LOC4345008	mRNA	-0.369799	8.87106e-18	03030///DNA replication+++03430///Mismatch repair+++03460///Fanconi anemia pathway+++03420///Nucleotide excision repair+++03440///Homologous recombination		M00288///RPA complex			GO:0005524///ATP binding+++GO:0003678///DNA helicase activity	GO:0006281///DNA repair+++GO:0006310///DNA recombination+++GO:0000723///telomere maintenance	LOC_Os08g13680
4328886	LOC4328886	mRNA	-1.04056	5.2236e-41						GO:0016788///hydrolase activity, acting on ester bonds		LOC_Os02g15230
4343988	LOC4343988	mRNA	-0.445514	1.59669e-10					GO:0005634///nucleus	GO:0003677///DNA binding	GO:0006351///transcription, DNA-templated+++GO:0006355///regulation of transcription, DNA-templated	LOC_Os07g43580
9272069	LOC9272069	mRNA	-1.57909	0.00151246						GO:0016788///hydrolase activity, acting on ester bonds+++GO:0016787///hydrolase activity
4332518	LOC4332518	mRNA	-0.399016	2.26528e-10		H00999///Coenzyme Q10 deficiency+++H00848///Ataxia with ocular apraxia (AOA)			GO:0005634///nucleus	GO:0047627///adenylylsulfatase activity+++GO:0046983///protein dimerization activity+++GO:0046872///metal ion binding+++GO:0003677///DNA binding+++GO:0005524///ATP binding	GO:0006260///DNA replication+++GO:0006351///transcription, DNA-templated+++GO:0009150///purine ribonucleotide metabolic process+++GO:0006790///sulfur compound metabolic process+++GO:0006355///regulation of transcription, DNA-templated	LOC_Os03g18210
4333117	LOC4333117	mRNA	-1.00706	1.17904e-47	01110///Biosynthesis of secondary metabolites+++01130///Biosynthesis of antibiotics+++01120///Microbial metabolism in diverse environments+++01100///Metabolic pathways+++00030///Pentose phosphate pathway+++01200///Carbon metabolism		M00008///Entner-Doudoroff pathway, glucose-6P => glyceraldehyde-3P + pyruvate+++M00006///Pentose phosphate pathway, oxidative phase, glucose 6P => ribulose 5P+++M00004///Pentose phosphate pathway (Pentose phosphate cycle)	R02035///6-Phospho-D-glucono-1,5-lactone lactonohydrolase D-Glucono-1,5-lactone 6-phosphate + H2O <=> 6-Phospho-D-gluconate	GO:0005737///cytoplasm	GO:0017057///6-phosphogluconolactonase activity	GO:0009051///pentose-phosphate shunt, oxidative branch+++GO:0005975///carbohydrate metabolic process	LOC_Os03g30300
4333539	LOC4333539	mRNA	-1.64804	1.01733e-20						GO:0016787///hydrolase activity	GO:0016042///lipid catabolic process+++GO:0006952///defense response	LOC_Os03g43880
4325107	LOC4325107	mRNA	-0.703459	1.7374e-24					GO:0016021///integral component of membrane+++GO:0016020///membrane			LOC_Os01g67240
4333108	LOC4333108	mRNA	-0.406109	0.0329103					GO:0016021///integral component of membrane			LOC_Os03g30060
4343645	LOC4343645	mRNA	-0.570422	1.9757e-07					GO:0005618///cell wall+++GO:0005576///extracellular region	GO:0004857///enzyme inhibitor activity	GO:0043086///negative regulation of catalytic activity+++GO:0030154///cell differentiation+++GO:0048833///specification of floral organ number	LOC_Os07g38130
4337165	LOC4337165	mRNA	-1.66172	1.1435e-23	01130///Biosynthesis of antibiotics+++00400///Phenylalanine, tyrosine and tryptophan biosynthesis+++01110///Biosynthesis of secondary metabolites+++01230///Biosynthesis of amino acids+++01100///Metabolic pathways		M00022///Shikimate pathway, phosphoenolpyruvate + erythrose-4P => chorismate	R02412///ATP:shikimate 3-phosphotransferase ATP + Shikimate <=> ADP + Shikimate 3-phosphate	GO:0009507///chloroplast+++GO:0009536///plastid	GO:0004765///shikimate kinase activity+++GO:0000166///nucleotide binding+++GO:0016740///transferase activity+++GO:0046872///metal ion binding+++GO:0005524///ATP binding+++GO:0000287///magnesium ion binding+++GO:0016301///kinase activity	GO:0008652///cellular amino acid biosynthetic process+++GO:0009423///chorismate biosynthetic process+++GO:0009073///aromatic amino acid family biosynthetic process+++GO:0016310///phosphorylation+++GO:0019632///shikimate metabolic process	LOC_Os04g54800
4333647	LOC4333647	mRNA	-0.77842	9.41561e-11					GO:0016021///integral component of membrane			LOC_Os03g46040
112938752	LOC112938752	mRNA	-0.32518	0.0111659	01110///Biosynthesis of secondary metabolites+++03013///RNA transport+++00860///Porphyrin and chlorophyll metabolism			R08584///chlorophyll-a magnesium-lyase (pheophytin-a-forming) Chlorophyll a + 2 H+ <=> Pheophytin a + Magnesium cation+++R09033///chlorophyllide magnesium-lyase (pheophorbide-forming) Chlorophyllide + 2 H+ <=> Pheophorbide a + Magnesium cation			GO:0009658///chloroplast organization
9270933	LOC9270933	mRNA	-1.2738	0.045463					GO:0016021///integral component of membrane	GO:0046872///metal ion binding+++GO:0061630///ubiquitin protein ligase activity	GO:0043161///proteasome-mediated ubiquitin-dependent protein catabolic process+++GO:0009793///embryo development ending in seed dormancy
4336644	LOC4336644	mRNA	-0.333653	0.0101616								LOC_Os04g47180
9267037	LOC9267037	mRNA	-0.475785	7.37945e-24	03430///Mismatch repair+++03420///Nucleotide excision repair+++03030///DNA replication+++03460///Fanconi anemia pathway+++03440///Homologous recombination		M00288///RPA complex
4349770	LOC4349770	mRNA	-0.488813	0.000167802					GO:0034399///nuclear periphery+++GO:0016021///integral component of membrane+++GO:0005886///plasma membrane	GO:0015079///potassium ion transmembrane transporter activity+++GO:0015081///sodium ion transmembrane transporter activity+++GO:0015297///antiporter activity	GO:0071805///potassium ion transmembrane transport+++GO:0006814///sodium ion transport	LOC_Os11g05070
112937935	LOC112937935	mRNA	-0.605785	0.00117027	04626///Plant-pathogen interaction+++04016///MAPK signaling pathway - plant				GO:0016021///integral component of membrane	GO:0005524///ATP binding+++GO:0004674///protein serine/threonine kinase activity
4348439	LOC4348439	mRNA	-0.917663	4.17066e-33					GO:0005634///nucleus	GO:0003677///DNA binding	GO:0006351///transcription, DNA-templated+++GO:0006355///regulation of transcription, DNA-templated	LOC_Os10g21560
4335748	LOC4335748	mRNA	-0.301619	6.81936e-05					GO:0009536///plastid+++GO:0009706///chloroplast inner membrane+++GO:0005773///vacuole+++GO:0042721///TIM22 mitochondrial import inner membrane insertion complex+++GO:0009941///chloroplast envelope+++GO:0016021///integral component of membrane+++GO:0005739///mitochondrion+++GO:0009507///chloroplast+++GO:0005886///plasma membrane+++GO:0005774///vacuolar membrane	GO:0043621///protein self-association	GO:0045039///protein import into mitochondrial inner membrane+++GO:0033365///protein localization to organelle+++GO:0016031///tRNA import into mitochondrion+++GO:0045036///protein targeting to chloroplast+++GO:0007005///mitochondrion organization
4336684	LOC4336684	mRNA	-1.771	1.49487e-17	04138///Autophagy - yeast	H01304///Hyperglycinuria+++H00905///Iminoglycinuria			GO:0016021///integral component of membrane+++GO:0005774///vacuolar membrane	GO:0015171///amino acid transmembrane transporter activity+++GO:0015175///neutral amino acid transmembrane transporter activity	GO:0003333///amino acid transmembrane transport+++GO:0015804///neutral amino acid transport
4337692	LOC4337692	mRNA	-1.27797	7.81661e-34						GO:0003677///DNA binding+++GO:0046872///metal ion binding		LOC_Os05g03760
9271214	LOC9271214	mRNA	-1.86812	0
4340022	LOC4340022	mRNA	-2.06544	3.75292e-92								LOC_Os06g04230
4339608	LOC4339608	mRNA	-0.842355	2.11216e-82								LOC_Os05g48800
4328835	LOC4328835	mRNA	-0.44747	0.000685643					GO:0005737///cytoplasm	GO:0010487///thermospermine synthase activity+++GO:0016768///spermine synthase activity	GO:0009926///auxin polar transport+++GO:0048759///xylem vessel member cell differentiation+++GO:0006596///polyamine biosynthetic process+++GO:0010087///phloem or xylem histogenesis	LOC_Os02g14190
4333543	LOC4333543	mRNA	-0.430618	0.0129024								LOC_Os03g43910
4332204	LOC4332204	mRNA	-1.04926	0.00141767						GO:0004842///ubiquitin-protein transferase activity+++GO:0016874///ligase activity	GO:0016567///protein ubiquitination	LOC_Os03g13740
4327738	LOC4327738	mRNA	-0.372832	2.78107e-07	01040///Biosynthesis of unsaturated fatty acids+++01212///Fatty acid metabolism+++00061///Fatty acid biosynthesis			R08161///hexadecanoyl-[acyl-carrier protein],reduced-ferredoxin:oxygen oxidoreductase (9,10 cis-dehydrogenating) Hexadecanoyl-[acp] + 2 Reduced ferredoxin + Oxygen + 2 H+ <=> Hexadecenoyl-[acyl-carrier protein] + 2 Oxidized ferredoxin + 2 H2O+++R11109///palmitoyl-[acyl-carrier protein],reduced-ferredoxin:oxygen oxidoreductase (6,7 cis-dehydrogenating) Hexadecanoyl-[acp] + 2 Reduced ferredoxin + O…	GO:0009570///chloroplast stroma+++GO:0009536///plastid+++GO:0009507///chloroplast	GO:0016491///oxidoreductase activity+++GO:0102786///stearoyl-[acp] desaturase activity+++GO:0045300///acyl-[acyl-carrier-protein] desaturase activity+++GO:0046872///metal ion binding	GO:0006952///defense response+++GO:0006633///fatty acid biosynthetic process+++GO:0006629///lipid metabolic process+++GO:0006631///fatty acid metabolic process+++GO:0055114///oxidation-reduction process	LOC_Os01g69080
4329952	LOC4329952	mRNA	-0.522769	9.97087e-05					GO:0009535///chloroplast thylakoid membrane			LOC_Os02g39730
4331535	LOC4331535	mRNA	-0.601402	2.88974e-17	00983///Drug metabolism - other enzymes+++00480///Glutathione metabolism+++00982///Drug metabolism - cytochrome P450+++00980///Metabolism of xenobiotics by cytochrome P450	H00516///Cleft lip and/or cleft palate+++H00024///Prostate cancer		R09409///glutathione-S-transferase Aflatoxin B1-exo-8,9-epoxide + Glutathione <=> Aflatoxin B1exo-8,9-epoxide-GSH+++R08280///4-glutathionyl cyclophosphamide hydrolase Aldophosphamide + Glutathione <=> 4-Glutathionyl cyclophosphamide + H2O+++R07070///2,3-dihydro-2-S-glutathionyl-3-hydroxy bromobenzene glutathione-lyase (epoxide-forming) Bromobenzene-2,3-oxide + Glutathione <=> 2,3-Dihydro-2-S-glut…	GO:0005737///cytoplasm	GO:0016740///transferase activity	GO:0006749///glutathione metabolic process	LOC_Os03g04260
4351215	LOC4351215	mRNA	-0.326244	5.56357e-07	03040///Spliceosome				GO:0016021///integral component of membrane	GO:0003723///RNA binding+++GO:0004252///serine-type endopeptidase activity		LOC_Os11g47830
9266500	LOC9266500	mRNA	-0.318964	0.0498294	00220///Arginine biosynthesis+++01200///Carbon metabolism+++01230///Biosynthesis of amino acids+++01210///2-Oxocarboxylic acid metabolism+++01120///Microbial metabolism in diverse environments+++00710///Carbon fixation in photosynthetic organisms+++00250///Alanine, aspartate and glutamate metabolism+++01100///Metabolic pathways	H01911///Syndromic autosomal recessive mental retardation	M00171///C4-dicarboxylic acid cycle, NAD - malic enzyme type	R00258///L-Alanine:2-oxoglutarate aminotransferase L-Alanine + 2-Oxoglutarate <=> Pyruvate + L-Glutamate		GO:0030170///pyridoxal phosphate binding+++GO:0004021///L-alanine:2-oxoglutarate aminotransferase activity	GO:0009058///biosynthetic process+++GO:0042853///L-alanine catabolic process	LOC_Os03g08530
4332425	LOC4332425	mRNA	-0.957627	1.82927e-87	00520///Amino sugar and nucleotide sugar metabolism			R00293///UDP-glucose 4,6-hydro-lyase (UDP-4-dehydro-6-deoxy-D-glucose-forming) UDP-glucose <=> UDP-4-dehydro-6-deoxy-D-glucose + H2O	GO:0005829///cytosol+++GO:0009506///plasmodesma	GO:0050377///UDP-glucose 4,6-dehydratase activity+++GO:0016491///oxidoreductase activity+++GO:0016853///isomerase activity+++GO:0008460///dTDP-glucose 4,6-dehydratase activity+++GO:0010280///UDP-L-rhamnose synthase activity	GO:0071555///cell wall organization+++GO:0010315///auxin efflux+++GO:0010253///UDP-rhamnose biosynthetic process+++GO:0042127///regulation of cell proliferation+++GO:0030154///cell differentiation+++GO:0051555///flavonol biosynthetic process	LOC_Os03g17000
4324404	LOC4324404	mRNA	-0.410573	1.21233e-12					GO:0005874///microtubule+++GO:0005737///cytoplasm+++GO:0005634///nucleus	GO:0008568///microtubule-severing ATPase activity+++GO:0005524///ATP binding+++GO:0008017///microtubule binding	GO:0043622///cortical microtubule organization+++GO:0009825///multidimensional cell growth+++GO:0000226///microtubule cytoskeleton organization+++GO:0009832///plant-type cell wall biogenesis+++GO:0010091///trichome branching	LOC_Os01g49000
112938316	LOC112938316	mRNA	-0.521464	2.27345e-20								LOC_Os03g08820
4334095	LOC4334095	mRNA	-0.353716	7.80787e-13								LOC_Os03g53590
4342404	LOC4342404	mRNA	-0.660775	1.99442e-05	01100///Metabolic pathways+++00195///Photosynthesis				GO:0016021///integral component of membrane+++GO:0009522///photosystem I+++GO:0009535///chloroplast thylakoid membrane		GO:0015979///photosynthesis	LOC_Os07g05480
4352681	LOC4352681	mRNA	-0.995175	0.000268566					GO:0005634///nucleus	GO:0003677///DNA binding	GO:0006351///transcription, DNA-templated+++GO:0006355///regulation of transcription, DNA-templated
4335651	LOC4335651	mRNA	-0.71198	6.45362e-06					GO:0005634///nucleus		GO:0016567///protein ubiquitination	LOC_Os04g31610
4331393	LOC4331393	mRNA	-0.457715	4.87023e-19					GO:0005737///cytoplasm+++GO:0005730///nucleolus	GO:0003723///RNA binding	GO:0042254///ribosome biogenesis	LOC_Os03g02420
4332631	LOC4332631	mRNA	-1.12449	1.28607e-20	04924///Renin secretion+++04720///Long-term potentiation+++04024///cAMP signaling pathway+++04745///Phototransduction - fly+++04261///Adrenergic signaling in cardiomyocytes+++04218///Cellular senescence+++04922///Glucagon signaling pathway+++04915///Estrogen signaling pathway+++04015///Rap1 signaling pathway+++04970///Salivary secretion+++04744///Phototransduction+++04371///Apelin signaling pathw…	H00720///Long QT syndrome+++H01019///Catecholaminergic polymorphic ventricular tachycardia			GO:0005829///cytosol	GO:0005509///calcium ion binding	GO:0042538///hyperosmotic salinity response
4340554	LOC4340554	mRNA	-0.34596	1.15622e-08								LOC_Os06g12260
4344291	LOC4344291	mRNA	-1.90068	2.37878e-44								LOC_Os07g48170
4325556	LOC4325556	mRNA	-0.508557	0.000672891	04212///Longevity regulating pathway - worm				GO:0005634///nucleus+++GO:0005737///cytoplasm	GO:0000978///RNA polymerase II proximal promoter sequence-specific DNA binding+++GO:0003700///DNA-binding transcription factor activity+++GO:0003677///DNA binding+++GO:0043565///sequence-specific DNA binding	GO:0034605///cellular response to heat+++GO:0061408///positive regulation of transcription from RNA polymerase II promoter in response to heat stress+++GO:0006355///regulation of transcription, DNA-templated	LOC_Os01g54550
112936426	LOC112936426	mRNA	-1.41292	0.00106064					GO:0000120///RNA polymerase I transcription factor complex		GO:0006360///transcription by RNA polymerase I	LOC_Os09g01700
4337831	LOC4337831	mRNA	-0.528776	0.000859132	03020///RNA polymerase+++01100///Metabolic pathways+++00240///Pyrimidine metabolism+++00230///Purine metabolism		M00180///RNA polymerase II, eukaryotes	R00435///ATP:polynucleotide adenylyltransferase; ATP:RNA ATP + RNA <=> Diphosphate + RNA+++R00441///GTP:RNA guanylyltransferase (DNA-directed); GTP:RNA GTP + RNA <=> Diphosphate + RNA+++R00442///CTP:RNA cytidylyltransferase (DNA-directed); CTP:RNA CTP + RNA <=> Diphosphate + RNA+++R00443///UTP:RNA uridylyltransferase UTP + RNA <=> Diphosphate + RNA	GO:0009506///plasmodesma+++GO:0009507///chloroplast+++GO:0005665///RNA polymerase II, core complex+++GO:0005773///vacuole	GO:0003677///DNA binding+++GO:0003899///DNA-directed 5'-3' RNA polymerase activity+++GO:0046872///metal ion binding	GO:0006366///transcription by RNA polymerase II	LOC_Os05g05860
4337834	LOC4337834	mRNA	-0.327601	3.04007e-13					GO:0009507///chloroplast+++GO:0016020///membrane+++GO:0009536///plastid+++GO:0005829///cytosol+++GO:0009707///chloroplast outer membrane+++GO:0061927///TOC-TIC supercomplex I+++GO:0009941///chloroplast envelope+++GO:0016021///integral component of membrane	GO:0003924///GTPase activity+++GO:0004888///transmembrane signaling receptor activity+++GO:0004930///G protein-coupled receptor activity+++GO:0051087///chaperone binding+++GO:0046872///metal ion binding+++GO:0043024///ribosomal small subunit binding+++GO:0005525///GTP binding	GO:0045036///protein targeting to chloroplast+++GO:0045037///protein import into chloroplast stroma	LOC_Os05g05950
4350988	LOC4350988	mRNA	-0.460444	6.72644e-11						GO:0005525///GTP binding
4346065	LOC4346065	mRNA	-0.457694	2.7996e-11					GO:0005634///nucleus	GO:0003677///DNA binding	GO:0006355///regulation of transcription, DNA-templated+++GO:0009725///response to hormone+++GO:0009734///auxin-activated signaling pathway	LOC_Os08g40900
4331849	LOC4331849	mRNA	-1.67722	0.0288448								LOC_Os03g08520
4341432	LOC4341432	mRNA	-1.35784	0.00289839	04075///Plant hormone signal transduction				GO:0005634///nucleus		GO:0006355///regulation of transcription, DNA-templated+++GO:0009734///auxin-activated signaling pathway	LOC_Os06g39590
4338912	LOC4338912	mRNA	-0.530569	0.0222687	00030///Pentose phosphate pathway+++04910///Insulin signaling pathway+++01100///Metabolic pathways+++01130///Biosynthesis of antibiotics+++00010///Glycolysis / Gluconeogenesis+++01110///Biosynthesis of secondary metabolites+++01200///Carbon metabolism+++00051///Fructose and mannose metabolism+++04152///AMPK signaling pathway+++01120///Microbial metabolism in diverse environments+++00680///Methane…	H00114///Fructose-1,6-bisphosphatase deficiency	M00167///Reductive pentose phosphate cycle, glyceraldehyde-3P => ribulose-5P+++M00165///Reductive pentose phosphate cycle (Calvin cycle)+++M00003///Gluconeogenesis, oxaloacetate => fructose-6P+++M00344///Formaldehyde assimilation, xylulose monophosphate pathway	R04780///beta-D-Fructose 1,6-bisphosphate 1-phosphohydrolase beta-D-Fructose 1,6-bisphosphate + H2O <=> beta-D-Fructose 6-phosphate + Orthophosphate+++R00762///D-Fructose-1,6-bisphosphate 1-phosphohydrolase D-Fructose 1,6-bisphosphate + H2O <=> D-Fructose 6-phosphate + Orthophosphate	GO:0005737///cytoplasm	GO:0046872///metal ion binding+++GO:0042132///fructose 1,6-bisphosphate 1-phosphatase activity	GO:0005975///carbohydrate metabolic process	LOC_Os05g36270
4342775	LOC4342775	mRNA	-0.458087	1.44532e-06	04138///Autophagy - yeast	H01304///Hyperglycinuria+++H00905///Iminoglycinuria			GO:0016021///integral component of membrane+++GO:0016020///membrane+++GO:0005789///endoplasmic reticulum membrane	GO:0015173///aromatic amino acid transmembrane transporter activity+++GO:0015175///neutral amino acid transmembrane transporter activity	GO:0009624///response to nematode	LOC_Os07g12770
4326471	LOC4326471	mRNA	-2.00663	0.00089558						GO:0030246///carbohydrate binding		LOC_Os01g24710
9267097	LOC9267097	mRNA	-0.541333	0.00617924	04075///Plant hormone signal transduction				GO:0005737///cytoplasm		GO:0009734///auxin-activated signaling pathway+++GO:0009958///positive gravitropism+++GO:0090057///root radial pattern formation+++GO:0060918///auxin transport+++GO:0040008///regulation of growth
4343584	LOC4343584	mRNA	-0.306995	0.00040811					GO:0016020///membrane+++GO:0009507///chloroplast+++GO:0009536///plastid+++GO:0016021///integral component of membrane+++GO:0009570///chloroplast stroma+++GO:0009527///plastid outer membrane+++GO:0009707///chloroplast outer membrane+++GO:0009534///chloroplast thylakoid		GO:0015979///photosynthesis+++GO:0010207///photosystem II assembly+++GO:0045038///protein import into chloroplast thylakoid membrane+++GO:0045037///protein import into chloroplast stroma+++GO:0010027///thylakoid membrane organization	LOC_Os07g37250
4339844	LOC4339844	mRNA	-0.371366	2.59161e-05	00643///Styrene degradation+++01100///Metabolic pathways+++01120///Microbial metabolism in diverse environments+++00350///Tyrosine metabolism	H00163///Alkaptonuria	M00044///Tyrosine degradation, tyrosine => homogentisate	R02519///Homogentisate:oxygen 1,2-oxidoreductase (decyclizing) Homogentisate + Oxygen <=> 4-Maleylacetoacetate	GO:0005829///cytosol	GO:0046872///metal ion binding+++GO:0051213///dioxygenase activity+++GO:0016491///oxidoreductase activity+++GO:0004411///homogentisate 1,2-dioxygenase activity	GO:0006520///cellular amino acid metabolic process+++GO:0006572///tyrosine catabolic process+++GO:1902000///homogentisate catabolic process+++GO:0055114///oxidation-reduction process+++GO:0006559///L-phenylalanine catabolic process+++GO:0006570///tyrosine metabolic process	LOC_Os06g01360
4334062	LOC4334062	mRNA	-0.381831	8.40469e-11					GO:0005634///nucleus	GO:0003700///DNA-binding transcription factor activity+++GO:0043565///sequence-specific DNA binding	GO:0006351///transcription, DNA-templated	LOC_Os03g53050
4328933	LOC4328933	mRNA	-0.680783	0.000319602						GO:0051087///chaperone binding
4347650	LOC4347650	mRNA	-1.81515	4.60442e-07					GO:0016020///membrane+++GO:0016021///integral component of membrane	GO:0016709///oxidoreductase activity, acting on paired donors, with incorporation or reduction of molecular oxygen, NAD(P)H as one donor, and incorporation of one atom of oxygen+++GO:0005506///iron ion binding+++GO:0020037///heme binding	GO:0010154///fruit development+++GO:0048316///seed development+++GO:0044550///secondary metabolite biosynthetic process+++GO:0040008///regulation of growth
4333081	LOC4333081	mRNA	-0.444259	7.66948e-12								LOC_Os03g29350
4339196	LOC4339196	mRNA	-0.427135	8.70737e-14					GO:0005634///nucleus	GO:0003677///DNA binding+++GO:0003700///DNA-binding transcription factor activity	GO:0010043///response to zinc ion+++GO:0006351///transcription, DNA-templated
4327426	LOC4327426	mRNA	-0.357254	0.0068353					GO:0005743///mitochondrial inner membrane+++GO:0005759///mitochondrial matrix+++GO:0005777///peroxisome	GO:0003959///NADPH dehydrogenase activity	GO:0055114///oxidation-reduction process	LOC_Os01g61410
4345701	LOC4345701	mRNA	-3.17676	1.05052e-05					GO:0016021///integral component of membrane+++GO:0009506///plasmodesma			LOC_Os08g34460
4336030	LOC4336030	mRNA	-0.345608	0.0205535					GO:0016021///integral component of membrane	GO:0016491///oxidoreductase activity		LOC_Os04g38420
4343521	LOC4343521	mRNA	-1.16056	1.14328e-71					GO:0005634///nucleus	GO:0043565///sequence-specific DNA binding+++GO:0003700///DNA-binding transcription factor activity	GO:0006355///regulation of transcription, DNA-templated
4336334	LOC4336334	mRNA	-0.718822	1.96231e-13								LOC_Os04g42620
4337927	LOC4337927	mRNA	-0.624922	2.69095e-13	04621///NOD-like receptor signaling pathway	H00891///Combined oxidative phosphorylation deficiency (COXPD)			GO:0005737///cytoplasm	GO:0016671///oxidoreductase activity, acting on a sulfur group of donors, disulfide as acceptor+++GO:0004791///thioredoxin-disulfide reductase activity+++GO:0047134///protein-disulfide reductase activity+++GO:0015035///protein disulfide oxidoreductase activity	GO:0006662///glycerol ether metabolic process+++GO:0045454///cell redox homeostasis+++GO:0034599///cellular response to oxidative stress	LOC_Os05g07690
4330461	LOC4330461	mRNA	-0.418471	0.00750557							GO:0006950///response to stress
4334589	LOC4334589	mRNA	-0.7723	1.89614e-05								LOC_Os03g60520
4339849	LOC4339849	mRNA	-0.734965	0.0025981					GO:0016021///integral component of membrane			LOC_Os06g01440
4327981	LOC4327981	mRNA	-1.45605	5.78603e-11	00260///Glycine, serine and threonine metabolism+++00630///Glyoxylate and dicarboxylate metabolism+++01130///Biosynthesis of antibiotics+++01110///Biosynthesis of secondary metabolites+++01100///Metabolic pathways+++01200///Carbon metabolism		M00532///Photorespiration	R01388///D-Glycerate:NAD+ 2-oxidoreductase D-Glycerate + NAD+ <=> Hydroxypyruvate + NADH + H+	GO:0048046///apoplast+++GO:0009507///chloroplast+++GO:0005777///peroxisome+++GO:0005829///cytosol	GO:0016618///hydroxypyruvate reductase activity+++GO:0030267///glyoxylate reductase (NADP) activity+++GO:0008266///poly(U) RNA binding+++GO:0008465///glycerate dehydrogenase activity+++GO:0051287///NAD binding	GO:0009854///oxidative photosynthetic carbon pathway+++GO:0042631///cellular response to water deprivation+++GO:0071482///cellular response to light stimulus
4345003	LOC4345003	mRNA	-2.22385	0.00175883	04910///Insulin signaling pathway				GO:0000145///exocyst		GO:0015031///protein transport+++GO:0006887///exocytosis	LOC_Os08g13570
4349793	LOC4349793	mRNA	-0.652705	3.76234e-12					GO:0016020///membrane+++GO:0016021///integral component of membrane	GO:0005215///transporter activity	GO:0055085///transmembrane transport
4346787	LOC4346787	mRNA	-1.56653	0.000881297						GO:0004842///ubiquitin-protein transferase activity	GO:0031146///SCF-dependent proteasomal ubiquitin-dependent protein catabolic process	LOC_Os09g17152
4350568	LOC4350568	mRNA	-5.20734	0.000472159						GO:0051087///chaperone binding		LOC_Os11g31060
4333473	LOC4333473	mRNA	-0.526581	0.000342221					GO:0005634///nucleus	GO:0003677///DNA binding	GO:0006355///regulation of transcription, DNA-templated+++GO:0006351///transcription, DNA-templated	LOC_Os03g42420
4333807	LOC4333807	mRNA	-0.452371	0.00537002					GO:0005634///nucleus+++GO:0005829///cytosol	GO:0016787///hydrolase activity+++GO:0016799///hydrolase activity, hydrolyzing N-glycosyl compounds	GO:0009691///cytokinin biosynthetic process
4326913	LOC4326913	mRNA	-1.93484	4.74368e-31								LOC_Os01g17396
4337724	LOC4337724	mRNA	-0.370797	1.99604e-07					GO:0005829///cytosol+++GO:0005737///cytoplasm+++GO:0005634///nucleus	GO:0008420///RNA polymerase II CTD heptapeptide repeat phosphatase activity+++GO:0046872///metal ion binding	GO:0070940///dephosphorylation of RNA polymerase II C-terminal domain+++GO:0030154///cell differentiation	LOC_Os05g04370
4328551	LOC4328551	mRNA	-1.11347	9.44343e-39					GO:0005634///nucleus	GO:0001135///RNA polymerase II transcription regulator recruiting activity+++GO:0000981///DNA-binding transcription factor activity, RNA polymerase II-specific+++GO:0044212///transcription regulatory region DNA binding+++GO:0003700///DNA-binding transcription factor activity+++GO:0043565///sequence-specific DNA binding	GO:0030154///cell differentiation+++GO:0006351///transcription, DNA-templated+++GO:0009555///pollen development+++GO:0006357///regulation of transcription by RNA polymerase II+++GO:0006355///regulation of transcription, DNA-templated	LOC_Os02g09480
4324808	LOC4324808	mRNA	-0.355271	0.000916475	04141///Protein processing in endoplasmic reticulum	H00063///Spinocerebellar ataxia (SCA)+++H01478///Machado-Joseph disease			GO:0005634///nucleus	GO:0004843///thiol-dependent ubiquitin-specific protease activity	GO:0006355///regulation of transcription, DNA-templated+++GO:0016579///protein deubiquitination+++GO:0006351///transcription, DNA-templated	LOC_Os01g63250
4348639	LOC4348639	mRNA	-2.59298	7.69983e-51		H00844///Familial benign chronic pemphigus			GO:0005887///integral component of plasma membrane+++GO:0000139///Golgi membrane+++GO:0005794///Golgi apparatus+++GO:0016021///integral component of membrane+++GO:0016020///membrane	GO:0016787///hydrolase activity+++GO:0005524///ATP binding+++GO:0005516///calmodulin binding+++GO:0046872///metal ion binding+++GO:0005388///calcium-transporting ATPase activity+++GO:0000166///nucleotide binding	GO:0070588///calcium ion transmembrane transport+++GO:0006811///ion transport+++GO:0006816///calcium ion transport+++GO:0099132///ATP hydrolysis coupled cation transmembrane transport	LOC_Os10g28240
4350065	LOC4350065	mRNA	-0.377345	0.0354212
9266309	LOC9266309	mRNA	-0.316312	0.0046039	01100///Metabolic pathways+++00790///Folate biosynthesis		M00126///Tetrahydrofolate biosynthesis, GTP => THF	R02237///7,8-dihydropteroate:L-glutamate ligase (ADP-forming) ATP + Dihydropteroate + L-Glutamate <=> ADP + Orthophosphate + Dihydrofolate	GO:0005759///mitochondrial matrix	GO:0008841///dihydrofolate synthase activity+++GO:0005524///ATP binding+++GO:0046872///metal ion binding	GO:0009793///embryo development ending in seed dormancy+++GO:0046654///tetrahydrofolate biosynthetic process+++GO:0046901///tetrahydrofolylpolyglutamate biosynthetic process+++GO:0006730///one-carbon metabolic process	LOC_Os12g42870
4347854	LOC4347854	mRNA	-0.348176	0.000295064	00790///Folate biosynthesis	H00192///Xanthinuria		R11583///L-cysteine:molybdenum cofactor sulfurtransferase Molybdoenzyme molybdenum cofactor + L-Cysteine + Reduced acceptor + H+ <=> Thio-molybdenum cofactor + L-Alanine + H2O + Acceptor		GO:0003824///catalytic activity+++GO:0030170///pyridoxal phosphate binding+++GO:0030151///molybdenum ion binding		LOC_Os09g38777
4352778	LOC4352778	mRNA	-0.470092	0.0127614	04612///Antigen processing and presentation				GO:0016602///CCAAT-binding factor complex	GO:0003700///DNA-binding transcription factor activity+++GO:0003677///DNA binding	GO:0006355///regulation of transcription, DNA-templated	LOC_Os12g41880
4325407	LOC4325407	mRNA	-0.955305	3.4542e-09	01110///Biosynthesis of secondary metabolites+++04919///Thyroid hormone signaling pathway+++00562///Inositol phosphate metabolism+++01100///Metabolic pathways+++02024///Quorum sensing+++00564///Glycerophospholipid metabolism+++00565///Ether lipid metabolism			R01312///Phosphatidylcholine cholinephosphohydrolase Phosphatidylcholine + H2O <=> 1,2-Diacyl-sn-glycerol + Choline phosphate+++R07381///Plasmenylethanolamine ethanolamine phosphohydrolase O-1-Alk-1-enyl-2-acyl-sn-glycero-3-phosphoethanolamine + H2O <=> 1-Alkenyl-2-acylglycerol + Ethanolamine phosphate+++R03332///1-Phosphatidyl-D-myo-inositol inositolphosphohydrolase 1-Phosphatidyl-D-myo-inositol…	GO:0005576///extracellular region	GO:0003993///acid phosphatase activity	GO:0009395///phospholipid catabolic process	LOC_Os01g72520
4351807	LOC4351807	mRNA	-1.19511	2.52666e-87	00561///Glycerolipid metabolism+++04072///Phospholipase D signaling pathway+++04070///Phosphatidylinositol signaling system+++01110///Biosynthesis of secondary metabolites+++00564///Glycerophospholipid metabolism+++01100///Metabolic pathways	H01657///Nephrotic syndrome+++H01726///Membranoproliferative glomerulonephritis		R02240///ATP:1,2-diacylglycerol 3-phosphotransferase ATP + 1,2-Diacyl-sn-glycerol <=> ADP + Phosphatidate	GO:0005622///intracellular+++GO:0016021///integral component of membrane	GO:0005524///ATP binding+++GO:0003951///NAD+ kinase activity+++GO:0046872///metal ion binding+++GO:0004143///diacylglycerol kinase activity	GO:0007205///protein kinase C-activating G protein-coupled receptor signaling pathway+++GO:0048364///root development+++GO:0048366///leaf development+++GO:0006952///defense response+++GO:0009611///response to wounding+++GO:0009409///response to cold+++GO:0035556///intracellular signal transduction	LOC_Os12g12260
4324175	LOC4324175	mRNA	-1.68293	1.64951e-17
4332121	LOC4332121	mRNA	-1.64616	2.89068e-07	01110///Biosynthesis of secondary metabolites+++01100///Metabolic pathways+++00592///alpha-Linolenic acid metabolism		M00113///Jasmonic acid biosynthesis	R07865///9(S)-HPOT <=> 9,10-EOT + H2O+++R07863///(9Z,11E,15Z)-(13S)-hydroperoxyoctadeca-9,11,15-trienoate 12,13-hydro-lyase [(9Z,15Z)-(13S)-12,13-epoxyoctadeca-9,11,15-trienoate-forming] 13(S)-HPOT <=> (9Z,15Z)-(13S)-12,13-Epoxyoctadeca-9,11,15-trienoic acid + H2O		GO:0005506///iron ion binding+++GO:0016829///lyase activity+++GO:0046872///metal ion binding+++GO:0047987///hydroperoxide dehydratase activity+++GO:0016705///oxidoreductase activity, acting on paired donors, with incorporation or reduction of molecular oxygen+++GO:0020037///heme binding	GO:0031408///oxylipin biosynthetic process+++GO:0016125///sterol metabolic process+++GO:0055114///oxidation-reduction process+++GO:0006631///fatty acid metabolic process+++GO:0006633///fatty acid biosynthetic process+++GO:0006629///lipid metabolic process	LOC_Os03g12500
9270251	LOC9270251	mRNA	-0.550843	0.00399754						GO:0008234///cysteine-type peptidase activity
4343227	LOC4343227	mRNA	-0.34731	0.000755577	04217///Necroptosis+++04144///Endocytosis		M00412///ESCRT-III complex		GO:0005829///cytosol+++GO:0005770///late endosome+++GO:0000815///ESCRT III complex		GO:0007034///vacuolar transport+++GO:0015031///protein transport+++GO:0070676///intralumenal vesicle formation
4346746	LOC4346746	mRNA	-0.326187	0.000134928					GO:0005739///mitochondrion+++GO:0005829///cytosol	GO:0004477///methenyltetrahydrofolate cyclohydrolase activity+++GO:0004488///methylenetetrahydrofolate dehydrogenase (NADP+) activity	GO:0009853///photorespiration+++GO:0035999///tetrahydrofolate interconversion+++GO:0006730///one-carbon metabolic process	LOC_Os09g15810
4350929	LOC4350929	mRNA	-0.305742	9.10596e-05								LOC_Os11g40249
4332409	LOC4332409	mRNA	-0.901492	4.96628e-74					GO:0005886///plasma membrane+++GO:0030136///clathrin-coated vesicle+++GO:0005794///Golgi apparatus+++GO:0005634///nucleus+++GO:0005905///clathrin-coated pit	GO:0030276///clathrin binding+++GO:0005545///1-phosphatidylinositol binding	GO:0048268///clathrin coat assembly+++GO:0006897///endocytosis
4345586	LOC4345586	mRNA	-0.682366	0.000294151					GO:0016021///integral component of membrane			LOC_Os08g32360
4349698	LOC4349698	mRNA	-0.340356	0.000445546					GO:0005634///nucleus+++GO:0005737///cytoplasm	GO:0000166///nucleotide binding+++GO:0016301///kinase activity+++GO:0005524///ATP binding+++GO:0004672///protein kinase activity+++GO:0004674///protein serine/threonine kinase activity+++GO:0016740///transferase activity	GO:0006468///protein phosphorylation+++GO:0007165///signal transduction+++GO:0016310///phosphorylation+++GO:0035556///intracellular signal transduction	LOC_Os11g03970
4331846	LOC4331846	mRNA	-0.356778	1.04328e-09	00190///Oxidative phosphorylation					GO:0003677///DNA binding	GO:0040008///regulation of growth+++GO:0006353///DNA-templated transcription, termination	LOC_Os03g08480
4327776	LOC4327776	mRNA	-0.761418	3.51008e-08								LOC_Os01g13390
4332620	LOC4332620	mRNA	-0.808643	7.38006e-08					GO:0005774///vacuolar membrane+++GO:0009941///chloroplast envelope+++GO:0031969///chloroplast membrane+++GO:0009507///chloroplast+++GO:0009570///chloroplast stroma	GO:0043621///protein self-association+++GO:0003727///single-stranded RNA binding	GO:0006396///RNA processing+++GO:0010114///response to red light+++GO:0009657///plastid organization+++GO:1901918///negative regulation of exoribonuclease activity+++GO:0006397///mRNA processing+++GO:0006417///regulation of translation	LOC_Os03g19560
4351514	LOC4351514	mRNA	-1.68774	1.45842e-15					GO:0043231///intracellular membrane-bounded organelle+++GO:0005789///endoplasmic reticulum membrane+++GO:0016021///integral component of membrane	GO:0005506///iron ion binding+++GO:0020037///heme binding+++GO:0018685///alkane 1-monooxygenase activity	GO:0009611///response to wounding	LOC_Os12g05440
4336341	LOC4336341	mRNA	-0.801804	2.02258e-31					GO:0016021///integral component of membrane+++GO:0005886///plasma membrane	GO:0005524///ATP binding+++GO:0004674///protein serine/threonine kinase activity
4332560	LOC4332560	mRNA	-0.623787	1.48892e-27								LOC_Os03g18770
4335473	LOC4335473	mRNA	-0.354467	2.69655e-11					GO:0005739///mitochondrion+++GO:0043231///intracellular membrane-bounded organelle	GO:0003723///RNA binding+++GO:0004519///endonuclease activity	GO:0009451///RNA modification	LOC_Os04g25410
4337385	LOC4337385	mRNA	-0.433727	1.19058e-14								LOC_Os04g57870
4324802	LOC4324802	mRNA	-2.76368	0.00274314					GO:0048046///apoplast+++GO:0005576///extracellular region	GO:0046872///metal ion binding+++GO:0052716///hydroquinone:oxygen oxidoreductase activity+++GO:0016491///oxidoreductase activity+++GO:0016722///oxidoreductase activity, oxidizing metal ions+++GO:0005507///copper ion binding	GO:0046274///lignin catabolic process+++GO:0055114///oxidation-reduction process	LOC_Os01g63190
4348941	LOC4348941	mRNA	-0.400768	4.65567e-11					GO:0009536///plastid+++GO:0042651///thylakoid membrane+++GO:0009507///chloroplast		GO:0000304///response to singlet oxygen	LOC_Os10g34400
4345814	LOC4345814	mRNA	-1.16075	1.94188e-15	01100///Metabolic pathways+++04973///Carbohydrate digestion and absorption+++00500///Starch and sucrose metabolism			R02112///1,4-alpha-D-Glucan maltohydrolase Starch <=> Dextrin + Maltose+++R11262///maltodextrin maltohydrolase Maltodextrin + H2O <=> Maltose+++R02108///1,4-alpha-D-Glucan glucanohydrolase Starch + H2O <=> Dextrin + Starch		GO:0003824///catalytic activity+++GO:0016798///hydrolase activity, acting on glycosyl bonds+++GO:0016787///hydrolase activity+++GO:0005509///calcium ion binding+++GO:0043169///cation binding+++GO:0103025///alpha-amylase activity (releasing maltohexaose)+++GO:0004556///alpha-amylase activity+++GO:0046872///metal ion binding	GO:0005983///starch catabolic process+++GO:0008152///metabolic process+++GO:0005987///sucrose catabolic process+++GO:0005975///carbohydrate metabolic process	LOC_Os08g36910
4334419	LOC4334419	mRNA	-0.648828	9.22475e-09	01110///Biosynthesis of secondary metabolites+++01100///Metabolic pathways+++00250///Alanine, aspartate and glutamate metabolism	H01386///Asparagine synthetase deficiency		R00578///L-aspartate:L-glutamine amido-ligase (AMP-forming) ATP + L-Aspartate + L-Glutamine + H2O <=> AMP + Diphosphate + L-Asparagine + L-Glutamate				LOC_Os03g58170
9267997	LOC9267997	mRNA	-0.472531	0.00255767	04659///Th17 cell differentiation+++04914///Progesterone-mediated oocyte maturation+++04626///Plant-pathogen interaction+++04612///Antigen processing and presentation+++04217///Necroptosis+++04915///Estrogen signaling pathway+++04141///Protein processing in endoplasmic reticulum+++04657///IL-17 signaling pathway+++04621///NOD-like receptor signaling pathway+++04151///PI3K-Akt signaling pathway				GO:0005737///cytoplasm	GO:0051082///unfolded protein binding+++GO:0005524///ATP binding	GO:0006457///protein folding+++GO:0006950///response to stress	LOC_Os04g01740
107280389	LOC107280389	mRNA	-4.53017	1.21951e-53						GO:0008270///zinc ion binding
4344874	LOC4344874	mRNA	-1.29186	1.19178e-11	04612///Antigen processing and presentation				GO:0005634///nucleus	GO:0003700///DNA-binding transcription factor activity	GO:0006355///regulation of transcription, DNA-templated	LOC_Os08g09690
4336918	LOC4336918	mRNA	-0.362292	1.91105e-09					GO:0016021///integral component of membrane+++GO:0005886///plasma membrane			LOC_Os04g51710
4344703	LOC4344703	mRNA	-1.16901	1.98355e-150	04712///Circadian rhythm - plant				GO:0005634///nucleus	GO:0003677///DNA binding	GO:0007623///circadian rhythm+++GO:0009845///seed germination+++GO:0009737///response to abscisic acid+++GO:0009739///response to gibberellin+++GO:0009751///response to salicylic acid+++GO:0009723///response to ethylene+++GO:0009733///response to auxin+++GO:0009909///regulation of flower development+++GO:0009753///response to jasmonic acid+++GO:0006351///transcription, DNA-templated+++GO:0006355/…	LOC_Os08g06110
4342066	LOC4342066	mRNA	-0.614649	2.30921e-05					GO:0005886///plasma membrane	GO:0004675///transmembrane receptor protein serine/threonine kinase activity+++GO:0005524///ATP binding	GO:0007166///cell surface receptor signaling pathway+++GO:0006952///defense response+++GO:0006468///protein phosphorylation	LOC_Os06g50100
4338101	LOC4338101	mRNA	-0.728316	2.73658e-07								LOC_Os05g12170
4332250	LOC4332250	mRNA	-0.383836	9.84085e-07	04137///Mitophagy - animal+++04138///Autophagy - yeast+++04136///Autophagy - other+++04140///Autophagy - animal				GO:0031410///cytoplasmic vesicle+++GO:0000421///autophagosome membrane+++GO:0005776///autophagosome+++GO:0016021///integral component of membrane+++GO:0000407///phagophore assembly site		GO:0006914///autophagy+++GO:0015031///protein transport+++GO:0050832///defense response to fungus+++GO:0044805///late nucleophagy+++GO:0000422///autophagy of mitochondrion+++GO:0034497///protein localization to phagophore assembly site	LOC_Os03g14380
4331104	LOC4331104	mRNA	-0.300311	6.2262e-06	03013///RNA transport	H00869///Leukoencephalopathy with vanishing white matter				GO:0003743///translation initiation factor activity+++GO:0016779///nucleotidyltransferase activity		LOC_Os02g56740
4344969	LOC4344969	mRNA	-0.378627	1.54427e-06					GO:0016021///integral component of membrane+++GO:0016020///membrane			LOC_Os08g12780
4345157	LOC4345157	mRNA	-0.324774	2.01791e-05	04130///SNARE interactions in vesicular transport				GO:0005773///vacuole+++GO:0010008///endosome membrane+++GO:0016021///integral component of membrane+++GO:0031902///late endosome membrane+++GO:0031201///SNARE complex+++GO:0005794///Golgi apparatus	GO:0005484///SNAP receptor activity+++GO:0000149///SNARE binding	GO:0016192///vesicle-mediated transport+++GO:0048278///vesicle docking+++GO:0006906///vesicle fusion+++GO:0006886///intracellular protein transport	LOC_Os08g17600
4337987	LOC4337987	mRNA	-1.07633	1.65592e-11					GO:0016021///integral component of membrane			LOC_Os05g08860
9272377	LOC9272377	mRNA	-0.624626	2.00825e-06	00260///Glycine, serine and threonine metabolism			R07409///choline,reduced-ferredoxin:oxygen oxidoreductase Choline + Oxygen + 2 Reduced ferredoxin + 2 H+ <=> Betaine aldehyde + 2 H2O + 2 Oxidized ferredoxin	GO:0009570///chloroplast stroma	GO:0005506///iron ion binding+++GO:0051537///2 iron, 2 sulfur cluster binding+++GO:0004497///monooxygenase activity+++GO:0016491///oxidoreductase activity+++GO:0019133///choline monooxygenase activity	GO:0055114///oxidation-reduction process+++GO:0044237///cellular metabolic process
4347111	LOC4347111	mRNA	-1.58918	2.7015e-07					GO:0016020///membrane+++GO:0005886///plasma membrane+++GO:0009506///plasmodesma+++GO:0016021///integral component of membrane		GO:0050829///defense response to Gram-negative bacterium	LOC_Os09g25760
4336991	LOC4336991	mRNA	-0.537375	1.04273e-18						GO:0003676///nucleic acid binding	GO:0031047///gene silencing by RNA	LOC_Os04g52540
4328555	LOC4328555	mRNA	-0.633361	4.54959e-09
9267257	LOC9267257	mRNA	-0.386107	7.00769e-05					GO:0034707///chloride channel complex	GO:0005247///voltage-gated chloride channel activity	GO:0034765///regulation of ion transmembrane transport	LOC_Os01g50860
9268562	LOC9268562	mRNA	-0.429724	2.74481e-07
9271634	LOC9271634	mRNA	-0.473418	1.19806e-09								LOC_Os09g30478
4352829	LOC4352829	mRNA	-0.554667	6.27749e-15	00430///Taurine and hypotaurine metabolism+++01100///Metabolic pathways			R02467///Cysteamine:oxygen oxidoreductase Cysteamine + Oxygen <=> Hypotaurine		GO:0016702///oxidoreductase activity, acting on single donors with incorporation of molecular oxygen, incorporation of two atoms of oxygen		LOC_Os12g42860
4332679	LOC4332679	mRNA	-0.862136	7.5724e-29					GO:0016021///integral component of membrane			LOC_Os03g20530
4349062	LOC4349062	mRNA	-4.46817	0.0199774							GO:0009737///response to abscisic acid+++GO:0006950///response to stress	LOC_Os10g36180
4325932	LOC4325932	mRNA	-0.336738	7.26795e-11	01130///Biosynthesis of antibiotics+++00630///Glyoxylate and dicarboxylate metabolism+++01200///Carbon metabolism+++01110///Biosynthesis of secondary metabolites+++00260///Glycine, serine and threonine metabolism+++01100///Metabolic pathways	H00191///Nonketotic hyperglycinemia	M00532///Photorespiration	R01221///glycine synthase; glycine Glycine + Tetrahydrofolate + NAD+ <=> 5,10-Methylenetetrahydrofolate + Ammonia + CO2 + NADH + H++++R03425///glycine:lipoylprotein oxidoreductase (decarboxylating and acceptor-aminomethylating) Glycine + Lipoylprotein <=> S-Aminomethyldihydrolipoylprotein + CO2	GO:0009570///chloroplast stroma+++GO:0005739///mitochondrion+++GO:0048046///apoplast+++GO:0009507///chloroplast+++GO:0009941///chloroplast envelope+++GO:0009534///chloroplast thylakoid	GO:0004375///glycine dehydrogenase (decarboxylating) activity	GO:0046686///response to cadmium ion+++GO:0006546///glycine catabolic process	LOC_Os01g51410
4338943	LOC4338943	mRNA	-0.397487	8.03975e-07								LOC_Os05g37400
4347517	LOC4347517	mRNA	-0.542744	0.00124486					GO:0005634///nucleus	GO:0046983///protein dimerization activity+++GO:0043565///sequence-specific DNA binding+++GO:0000977///RNA polymerase II regulatory region sequence-specific DNA binding+++GO:0003700///DNA-binding transcription factor activity+++GO:0000981///DNA-binding transcription factor activity, RNA polymerase II-specific+++GO:0008134///transcription factor binding+++GO:0044212///transcription regulatory regi…	GO:0045944///positive regulation of transcription by RNA polymerase II+++GO:0030154///cell differentiation+++GO:0007275///multicellular organism development+++GO:0009908///flower development+++GO:0048481///plant ovule development+++GO:0006355///regulation of transcription, DNA-templated	LOC_Os09g32948
4329716	LOC4329716	mRNA	-0.83892	5.45945e-23						GO:0004722///protein serine/threonine phosphatase activity+++GO:0046872///metal ion binding		LOC_Os02g35910
9271235	LOC9271235	mRNA	-0.362223	3.20138e-06		H01891///Autosomal recessive spinocerebellar ataxias+++H00999///Coenzyme Q10 deficiency+++H01657///Nephrotic syndrome						LOC_Os07g27480
4346700	LOC4346700	mRNA	-0.401034	3.0273e-06		H00797///Martsolf syndrome+++H00792///Warburg micro syndrome					GO:0043087///regulation of GTPase activity	LOC_Os09g14680
4330351	LOC4330351	mRNA	-0.719282	2.25754e-31	04626///Plant-pathogen interaction				GO:0005737///cytoplasm+++GO:0005634///nucleus+++GO:0016020///membrane	GO:0004683///calmodulin-dependent protein kinase activity+++GO:0005516///calmodulin binding+++GO:0009931///calcium-dependent protein serine/threonine kinase activity+++GO:0005509///calcium ion binding+++GO:0005524///ATP binding	GO:0018105///peptidyl-serine phosphorylation+++GO:0046777///protein autophosphorylation+++GO:0009738///abscisic acid-activated signaling pathway+++GO:0035556///intracellular signal transduction	LOC_Os02g46090
4323890	LOC4323890	mRNA	-0.494085	1.15121e-09	00564///Glycerophospholipid metabolism			R02037///S-Adenosyl-L-methionine:ethanolamine-phosphate N-methyltransferase S-Adenosyl-L-methionine + Ethanolamine phosphate <=> S-Adenosyl-L-homocysteine + N-Methylethanolamine phosphate+++R06868///S-Adenosyl-L-methionine:methylethanolamine phosphate N-methyltransferase S-Adenosyl-L-methionine + N-Methylethanolamine phosphate <=> S-Adenosyl-L-homocysteine + Phosphodimethylethanolamine+++R06869//…	GO:0005829///cytosol+++GO:0005737///cytoplasm	GO:0000234///phosphoethanolamine N-methyltransferase activity+++GO:0008168///methyltransferase activity	GO:0010183///pollen tube guidance+++GO:0048528///post-embryonic root development+++GO:0009555///pollen development+++GO:0042425///choline biosynthetic process+++GO:0009826///unidimensional cell growth+++GO:0006656///phosphatidylcholine biosynthetic process+++GO:0009860///pollen tube growth	LOC_Os01g50030
4340034	LOC4340034	mRNA	-0.420889	8.63044e-06								LOC_Os06g04390
4347050	LOC4347050	mRNA	-0.494243	0.000537773					GO:0016021///integral component of membrane+++GO:0022625///cytosolic large ribosomal subunit	GO:0003723///RNA binding+++GO:0003735///structural constituent of ribosome	GO:0042254///ribosome biogenesis+++GO:0006412///translation	LOC_Os09g24700
4334174	LOC4334174	mRNA	-0.343403	5.57889e-06					GO:0016021///integral component of membrane	GO:0009055///electron transfer activity		LOC_Os03g55120
4338740	LOC4338740	mRNA	-2.57467	0.0047735						GO:0004190///aspartic-type endopeptidase activity	GO:0006508///proteolysis+++GO:0030163///protein catabolic process	LOC_Os05g33430
4330824	LOC4330824	mRNA	-0.878627	8.17155e-12					GO:0005794///Golgi apparatus+++GO:0016021///integral component of membrane+++GO:0032580///Golgi cisterna membrane	GO:0042803///protein homodimerization activity+++GO:0008417///fucosyltransferase activity+++GO:0008107///galactoside 2-alpha-L-fucosyltransferase activity	GO:0009969///xyloglucan biosynthetic process+++GO:0071555///cell wall organization+++GO:0042546///cell wall biogenesis
4342769	LOC4342769	mRNA	-0.508769	4.60379e-13					GO:0005634///nucleus	GO:0003746///translation elongation factor activity+++GO:0008270///zinc ion binding	GO:0010162///seed dormancy process+++GO:0009910///negative regulation of flower development+++GO:0009845///seed germination+++GO:0009739///response to gibberellin+++GO:0006351///transcription, DNA-templated+++GO:0034243///regulation of transcription elongation from RNA polymerase II promoter	LOC_Os07g12630
9271632	LOC9271632	mRNA	-0.410623	1.32793e-07					GO:0016021///integral component of membrane+++GO:0016020///membrane			LOC_Os01g59670
4331959	LOC4331959	mRNA	-0.585931	2.14253e-13					GO:0016021///integral component of membrane			LOC_Os03g10240
4331381	LOC4331381	mRNA	-0.880414	8.75005e-06								LOC_Os03g02280
107280637	LOC107280637	mRNA	-0.828485	0.00194182						GO:0004672///protein kinase activity+++GO:0005524///ATP binding
4328488	LOC4328488	mRNA	-0.486511	1.21255e-16						GO:0016773///phosphotransferase activity, alcohol group as acceptor	GO:0005975///carbohydrate metabolic process
4349148	LOC4349148	mRNA	-2.21365	1.58734e-120					GO:0016021///integral component of membrane+++GO:0000139///Golgi membrane+++GO:0005794///Golgi apparatus+++GO:0009506///plasmodesma	GO:0004252///serine-type endopeptidase activity		LOC_Os10g37760
4347258	LOC4347258	mRNA	-0.685552	0.000180854								LOC_Os09g28340
4334545	LOC4334545	mRNA	-0.463493	1.1129e-28	04072///Phospholipase D signaling pathway+++04144///Endocytosis				GO:0005794///Golgi apparatus	GO:0005525///GTP binding	GO:0015031///protein transport+++GO:0016192///vesicle-mediated transport	LOC_Os03g59740
4346195	LOC4346195	mRNA	-0.321604	2.8264e-05	03010///Ribosome		M00177///Ribosome, eukaryotes		GO:0022625///cytosolic large ribosomal subunit+++GO:0005730///nucleolus	GO:0003735///structural constituent of ribosome+++GO:0043531///ADP binding
4330911	LOC4330911	mRNA	-0.304076	0.00314831					GO:0009570///chloroplast stroma	GO:0005504///fatty acid binding+++GO:0016872///intramolecular lyase activity	GO:0006631///fatty acid metabolic process	LOC_Os02g53810
4348615	LOC4348615	mRNA	-0.603057	6.42689e-21	01100///Metabolic pathways+++00330///Arginine and proline metabolism	H02041///Myopia		R01252///L-Proline,2-oxoglutarate:oxygen oxidoreductase (4-hydroxylating) L-Proline + 2-Oxoglutarate + Oxygen <=> Hydroxyproline + Succinate + CO2	GO:0016021///integral component of membrane+++GO:0005789///endoplasmic reticulum membrane	GO:0005506///iron ion binding+++GO:0031418///L-ascorbic acid binding+++GO:0004656///procollagen-proline 4-dioxygenase activity		LOC_Os10g27340
4349529	LOC4349529	mRNA	-0.396569	2.67219e-06	03013///RNA transport+++03008///Ribosome biogenesis in eukaryotes					GO:0004540///ribonuclease activity	GO:0008033///tRNA processing	LOC_Os11g01074
4324389	LOC4324389	mRNA	-0.48317	1.46508e-08								LOC_Os01g48830
4338253	LOC4338253	mRNA	-0.459691	1.72955e-18	04350///TGF-beta signaling pathway+++04150///mTOR signaling pathway+++04151///PI3K-Akt signaling pathway+++04371///Apelin signaling pathway+++04213///Longevity regulating pathway - multiple species+++04152///AMPK signaling pathway+++04012///ErbB signaling pathway+++04140///Autophagy - animal+++04066///HIF-1 signaling pathway+++04666///Fc gamma R-mediated phagocytosis+++04211///Longevity regulatin…							LOC_Os05g18660
4330048	LOC4330048	mRNA	-0.834826	4.38566e-23								LOC_Os02g41840
4341936	LOC4341936	mRNA	-0.621044	1.60444e-12								LOC_Os06g48040
4346135	LOC4346135	mRNA	-0.319825	0.0195984					GO:0005634///nucleus	GO:0046983///protein dimerization activity+++GO:0000977///RNA polymerase II regulatory region sequence-specific DNA binding	GO:0006351///transcription, DNA-templated+++GO:0045944///positive regulation of transcription by RNA polymerase II	LOC_Os08g41960
4333626	LOC4333626	mRNA	-1.08063	1.1365e-58					GO:0005634///nucleus	GO:0008270///zinc ion binding+++GO:0003676///nucleic acid binding		LOC_Os03g45730
4351292	LOC4351292	mRNA	-0.614504	6.2027e-27								LOC_Os12g01940
9266439	LOC9266439	mRNA	-0.515652	7.47661e-19	03420///Nucleotide excision repair+++03440///Homologous recombination+++03460///Fanconi anemia pathway+++03030///DNA replication+++03430///Mismatch repair		M00288///RPA complex			GO:0003678///DNA helicase activity+++GO:0005524///ATP binding	GO:0006281///DNA repair+++GO:0006310///DNA recombination+++GO:0000723///telomere maintenance
4346336	LOC4346336	mRNA	-0.882082	1.56422e-14					GO:0016021///integral component of membrane
4342552	LOC4342552	mRNA	-4.2032	0.0468424					GO:0016021///integral component of membrane+++GO:0031969///chloroplast membrane			LOC_Os07g08160
4324245	LOC4324245	mRNA	-0.331548	6.01339e-11	00900///Terpenoid backbone biosynthesis+++01110///Biosynthesis of secondary metabolites+++01130///Biosynthesis of antibiotics+++01100///Metabolic pathways	H01933///Porokeratosis	M00367///C10-C20 isoprenoid biosynthesis, non-plant eukaryotes+++M00366///C10-C20 isoprenoid biosynthesis, plants	R02003///Geranyl-diphosphate:isopentenyl-diphosphate geranyltrans-transferase Geranyl diphosphate + Isopentenyl diphosphate <=> Diphosphate + trans,trans-Farnesyl diphosphate+++R01658///Dimethylallyl-diphosphate:isopentenyl-diphosphate dimethylallyltranstransferase Dimethylallyl diphosphate + Isopentenyl diphosphate <=> Diphosphate + Geranyl diphosphate	GO:0005737///cytoplasm	GO:0004161///dimethylallyltranstransferase activity+++GO:0004337///geranyltranstransferase activity+++GO:0016740///transferase activity	GO:0045337///farnesyl diphosphate biosynthetic process+++GO:0008299///isoprenoid biosynthetic process+++GO:0033384///geranyl diphosphate biosynthetic process	LOC_Os01g50760
4339416	LOC4339416	mRNA	-0.479961	1.04762e-10					GO:0016021///integral component of membrane			LOC_Os05g45490
9272197	LOC9272197	mRNA	-0.494197	6.12291e-06						GO:0003677///DNA binding	GO:0042023///DNA endoreduplication
4337130	LOC4337130	mRNA	-2.89071	2.41271e-39
4348711	LOC4348711	mRNA	-0.313403	1.14677e-07	02026///Biofilm formation - Escherichia coli+++01110///Biosynthesis of secondary metabolites+++00500///Starch and sucrose metabolism+++01100///Metabolic pathways		M00565///Trehalose biosynthesis, D-glucose 1P => trehalose	R02421///ADP-glucose:1,4-alpha-D-glucan 4-alpha-D-glucosyltransferase ADP-glucose + Amylose <=> ADP + Amylose	GO:0009507///chloroplast+++GO:0009501///amyloplast+++GO:0009536///plastid	GO:0009011///starch synthase activity+++GO:0016757///transferase activity, transferring glycosyl groups+++GO:0004373///glycogen (starch) synthase activity+++GO:0033201///alpha-1,4-glucan synthase activity+++GO:0016740///transferase activity	GO:0019252///starch biosynthetic process
4333768	LOC4333768	mRNA	-0.47299	1.29654e-18	04070///Phosphatidylinositol signaling system			R05799///ATP:1D-myo-inositol-hexakisphosphate phosphotransferase ATP + Phytic acid <=> ADP + 1-Diphosinositol pentakisphosphate+++R08964///ATP:1D-myo-inositol-5-diphosphate-pentakisphosphate phosphotransferase ATP + 5-PP-InsP5 <=> ADP + 1D-myo-Inositol 1,5-bis(diphosphate) 2,3,4,6-tetrakisphosphate	GO:0005829///cytosol+++GO:0005886///plasma membrane	GO:0052723///inositol hexakisphosphate 1-kinase activity+++GO:0102092///5-diphosphoinositol pentakisphosphate 3-kinase activity+++GO:0000828///inositol hexakisphosphate kinase activity+++GO:0052724///inositol hexakisphosphate 3-kinase activity+++GO:0000829///inositol heptakisphosphate kinase activity+++GO:0005524///ATP binding+++GO:0000832///inositol hexakisphosphate 5-kinase activity+++GO:003385…	GO:0006020///inositol metabolic process+++GO:0032958///inositol phosphate biosynthetic process+++GO:1904966///positive regulation of vitamin E biosynthetic process	LOC_Os03g48300
4334449	LOC4334449	mRNA	-0.464725	0.000139147					GO:0005737///cytoplasm+++GO:0005634///nucleus+++GO:0005731///nucleolus organizer region+++GO:0005730///nucleolus	GO:0003676///nucleic acid binding+++GO:0035197///siRNA binding	GO:0007143///female meiotic nuclear division+++GO:0007140///male meiotic nuclear division+++GO:0009561///megagametogenesis+++GO:0055046///microgametogenesis+++GO:0031047///gene silencing by RNA+++GO:0033169///histone H3-K9 demethylation+++GO:0051321///meiotic cell cycle	LOC_Os03g58600
4331873	LOC4331873	mRNA	-0.430024	8.25752e-06	04144///Endocytosis	H00266///Hereditary spastic paraplegia (SPG)+++H01439///Williams-Beuren syndrome	M00409///ESCRT-I complex		GO:0000813///ESCRT I complex		GO:0032509///endosome transport via multivesicular body sorting pathway+++GO:0015031///protein transport	LOC_Os03g08770
4347142	LOC4347142	mRNA	-0.469023	3.20107e-17					GO:0005634///nucleus	GO:0003700///DNA-binding transcription factor activity+++GO:0003677///DNA binding	GO:0006355///regulation of transcription, DNA-templated	LOC_Os09g26420
107278750	LOC107278750	mRNA	-1.93478	1.88924e-06	04075///Plant hormone signal transduction+++04016///MAPK signaling pathway - plant				GO:0005622///intracellular+++GO:0005634///nucleus	GO:0003700///DNA-binding transcription factor activity+++GO:0003677///DNA binding	GO:0006351///transcription, DNA-templated+++GO:0009873///ethylene-activated signaling pathway+++GO:0006355///regulation of transcription, DNA-templated+++GO:0071281///cellular response to iron ion
4339055	LOC4339055	mRNA	-0.355888	0.000164018	04012///ErbB signaling pathway+++04152///AMPK signaling pathway+++04213///Longevity regulating pathway - multiple species+++04910///Insulin signaling pathway+++04150///mTOR signaling pathway+++04350///TGF-beta signaling pathway+++04714///Thermogenesis+++04371///Apelin signaling pathway+++04212///Longevity regulating pathway - worm+++04666///Fc gamma R-mediated phagocytosis+++04066///HIF-1 signali…							LOC_Os05g39120
4338636	LOC4338636	mRNA	-0.400457	6.39031e-05					GO:0016021///integral component of membrane			LOC_Os05g31680
9270349	LOC9270349	mRNA	-2.94513	1.84295e-56					GO:0005634///nucleus	GO:0003700///DNA-binding transcription factor activity+++GO:0043565///sequence-specific DNA binding	GO:0006351///transcription, DNA-templated+++GO:0019760///glucosinolate metabolic process+++GO:0009873///ethylene-activated signaling pathway
4323870	LOC4323870	mRNA	-0.439079	1.07678e-06	04071///Sphingolipid signaling pathway+++04728///Dopaminergic synapse+++03015///mRNA surveillance pathway+++04152///AMPK signaling pathway+++04113///Meiosis - yeast+++04114///Oocyte meiosis+++04261///Adrenergic signaling in cardiomyocytes+++04151///PI3K-Akt signaling pathway	H00773///Autosomal dominant mental retardation			GO:0000159///protein phosphatase type 2A complex	GO:0019888///protein phosphatase regulator activity	GO:0043666///regulation of phosphoprotein phosphatase activity+++GO:0007165///signal transduction
4345100	LOC4345100	mRNA	-0.597998	0.00155787					GO:0016021///integral component of membrane			LOC_Os08g15650
4329709	LOC4329709	mRNA	-0.775084	7.94781e-16					GO:0016021///integral component of membrane			LOC_Os02g35830
4330508	LOC4330508	mRNA	-1.36646	0.00532562					GO:0005634///nucleus	GO:0003680///AT DNA binding+++GO:0003700///DNA-binding transcription factor activity+++GO:0043621///protein self-association	GO:0006351///transcription, DNA-templated+++GO:0009938///negative regulation of gibberellic acid mediated signaling pathway	LOC_Os02g48320
4347234	LOC4347234	mRNA	-1.90214	0.0350459					GO:0000139///Golgi membrane+++GO:0016021///integral component of membrane+++GO:0005794///Golgi apparatus	GO:0048531///beta-1,3-galactosyltransferase activity	GO:0006486///protein glycosylation	LOC_Os09g27950
9268149	LOC9268149	mRNA	-0.701422	3.52158e-23								LOC_Os02g37834
4331548	LOC4331548	mRNA	-0.462821	1.84378e-12						GO:0004722///protein serine/threonine phosphatase activity+++GO:0046872///metal ion binding		LOC_Os03g04430
4332124	LOC4332124	mRNA	-0.839187	0.0462632	04064///NF-kappa B signaling pathway+++04621///NOD-like receptor signaling pathway+++04620///Toll-like receptor signaling pathway+++04010///MAPK signaling pathway+++04624///Toll and Imd signaling pathway+++04722///Neurotrophin signaling pathway	H00096///Defects of toll-like receptor signaling	M00686///Toll-like receptor signaling		GO:0005886///plasma membrane	GO:0004675///transmembrane receptor protein serine/threonine kinase activity+++GO:0005524///ATP binding+++GO:0004713///protein tyrosine kinase activity	GO:0048768///root hair cell tip growth+++GO:0007166///cell surface receptor signaling pathway+++GO:0009860///pollen tube growth+++GO:0006468///protein phosphorylation	LOC_Os03g12520
4345841	LOC4345841	mRNA	-0.980415	8.1886e-60					GO:0016021///integral component of membrane+++GO:0016020///membrane	GO:0022857///transmembrane transporter activity	GO:0055085///transmembrane transport	LOC_Os08g37370
4324759	LOC4324759	mRNA	-0.659763	0.0088469								LOC_Os01g63880
4339093	LOC4339093	mRNA	-0.330633	0.000874479					GO:0016021///integral component of membrane			LOC_Os05g39730
4330614	LOC4330614	mRNA	-0.657934	4.02892e-33					GO:0005886///plasma membrane+++GO:0016020///membrane+++GO:0016021///integral component of membrane	GO:0015079///potassium ion transmembrane transporter activity	GO:0006811///ion transport+++GO:0071805///potassium ion transmembrane transport+++GO:0006813///potassium ion transport	LOC_Os02g49760
4337225	LOC4337225	mRNA	-0.881493	3.14491e-20					GO:0005794///Golgi apparatus+++GO:0016020///membrane+++GO:0000139///Golgi membrane	GO:0015018///galactosylgalactosylxylosylprotein 3-beta-glucuronosyltransferase activity+++GO:0016740///transferase activity	GO:0071555///cell wall organization	LOC_Os04g55670
4345815	LOC4345815	mRNA	-2.2166	1.18475e-35					GO:0005634///nucleus	GO:0003700///DNA-binding transcription factor activity+++GO:0003677///DNA binding	GO:0048510///regulation of timing of transition from vegetative to reproductive phase+++GO:0009873///ethylene-activated signaling pathway+++GO:0006351///transcription, DNA-templated+++GO:0045893///positive regulation of transcription, DNA-templated	LOC_Os08g36920
4335859	LOC4335859	mRNA	-1.78115	0.0060918						GO:0046983///protein dimerization activity
4337448	LOC4337448	mRNA	-0.340428	3.93129e-13					GO:0016021///integral component of membrane	GO:0016757///transferase activity, transferring glycosyl groups		LOC_Os04g58720
4328685	LOC4328685	mRNA	-0.43742	1.37708e-22					GO:0031969///chloroplast membrane+++GO:0009507///chloroplast+++GO:0005737///cytoplasm+++GO:0009941///chloroplast envelope+++GO:0009536///plastid+++GO:0016021///integral component of membrane	GO:0005524///ATP binding+++GO:0005471///ATP:ADP antiporter activity		LOC_Os02g11740
4338850	LOC4338850	mRNA	-0.573631	4.80604e-48	04150///mTOR signaling pathway+++04068///FoxO signaling pathway+++04110///Cell cycle+++04120///Ubiquitin mediated proteolysis		M00381///SCF-SKP2 complex		GO:0005634///nucleus+++GO:0019005///SCF ubiquitin ligase complex	GO:0004842///ubiquitin-protein transferase activity	GO:0010311///lateral root formation+++GO:0031146///SCF-dependent proteasomal ubiquitin-dependent protein catabolic process+++GO:0051781///positive regulation of cell division+++GO:0009734///auxin-activated signaling pathway+++GO:0071365///cellular response to auxin stimulus+++GO:0016567///protein ubiquitination	LOC_Os05g35110
107280745	LOC107280745	mRNA	-0.332109	2.18033e-06								LOC_Os04g48484
4342019	LOC4342019	mRNA	-0.46785	0.000260037							GO:0042138///meiotic DNA double-strand break formation	LOC_Os06g49450
4336008	LOC4336008	mRNA	-0.554732	5.11252e-08	04712///Circadian rhythm - plant				GO:0016604///nuclear body+++GO:0016605///PML body+++GO:0005737///cytoplasm+++GO:0005634///nucleus	GO:0009882///blue light photoreceptor activity	GO:0009785///blue light signaling pathway	LOC_Os04g37920
4331917	LOC4331917	mRNA	-0.343859	3.31817e-12	01100///Metabolic pathways+++00521///Streptomycin biosynthesis+++00562///Inositol phosphate metabolism+++01130///Biosynthesis of antibiotics			R07324///1D-myo-inositol-3-phosphate lyase (isomerizing) D-Glucose 6-phosphate <=> 1D-myo-Inositol 3-phosphate	GO:0005737///cytoplasm	GO:0016853///isomerase activity+++GO:0004512///inositol-3-phosphate synthase activity	GO:0006629///lipid metabolic process+++GO:0008654///phospholipid biosynthetic process+++GO:0006021///inositol biosynthetic process	LOC_Os03g09250
4336744	LOC4336744	mRNA	-0.436113	5.32235e-17						GO:0016788///hydrolase activity, acting on ester bonds	GO:0016042///lipid catabolic process	LOC_Os04g48800
4342550	LOC4342550	mRNA	-0.390474	0.000307047					GO:0005737///cytoplasm+++GO:0005634///nucleus	GO:0043565///sequence-specific DNA binding+++GO:0003700///DNA-binding transcription factor activity+++GO:0000978///RNA polymerase II proximal promoter sequence-specific DNA binding+++GO:0003677///DNA binding	GO:0034605///cellular response to heat+++GO:0006355///regulation of transcription, DNA-templated+++GO:0061408///positive regulation of transcription from RNA polymerase II promoter in response to heat stress	LOC_Os07g08140
4332937	LOC4332937	mRNA	-0.339008	0.0199059						GO:0020037///heme binding+++GO:0004497///monooxygenase activity+++GO:0016705///oxidoreductase activity, acting on paired donors, with incorporation or reduction of molecular oxygen+++GO:0005506///iron ion binding
9267894	LOC9267894	mRNA	-1.304	1.84215e-11						GO:0008289///lipid binding	GO:0006869///lipid transport
107278050	LOC107278050	mRNA	-0.936621	0.000325371						GO:0005524///ATP binding+++GO:0003964///RNA-directed DNA polymerase activity+++GO:0004672///protein kinase activity+++GO:0003676///nucleic acid binding
4333580	LOC4333580	mRNA	-0.704432	2.2509e-101	04141///Protein processing in endoplasmic reticulum				GO:0005886///plasma membrane	GO:0051082///unfolded protein binding+++GO:0005524///ATP binding+++GO:0031072///heat shock protein binding+++GO:0046872///metal ion binding	GO:0006457///protein folding+++GO:0009408///response to heat	LOC_Os03g44620
4343612	LOC4343612	mRNA	-0.384006	7.26777e-19	04144///Endocytosis				GO:0005768///endosome+++GO:0030136///clathrin-coated vesicle+++GO:0005802///trans-Golgi network+++GO:0005829///cytosol	GO:0046872///metal ion binding+++GO:0005096///GTPase activator activity	GO:0043547///positive regulation of GTPase activity	LOC_Os07g37650
4349417	LOC4349417	mRNA	-0.371368	0.0199071	00500///Starch and sucrose metabolism			R02112///1,4-alpha-D-Glucan maltohydrolase Starch <=> Dextrin + Maltose+++R11262///maltodextrin maltohydrolase Maltodextrin + H2O <=> Maltose	GO:0009570///chloroplast stroma	GO:0016161///beta-amylase activity+++GO:0102229///amylopectin maltohydrolase activity	GO:0005983///starch catabolic process+++GO:0000024///maltose biosynthetic process+++GO:0009409///response to cold	LOC_Os10g41550
4344032	LOC4344032	mRNA	-0.34727	0.000518356								LOC_Os07g44230
4331518	LOC4331518	mRNA	-0.957358	4.35795e-43	04075///Plant hormone signal transduction				GO:0005886///plasma membrane	GO:0004675///transmembrane receptor protein serine/threonine kinase activity+++GO:0005524///ATP binding	GO:0050832///defense response to fungus+++GO:0045087///innate immune response+++GO:0007166///cell surface receptor signaling pathway+++GO:0009742///brassinosteroid mediated signaling pathway+++GO:0006468///protein phosphorylation	LOC_Os03g04050
4324859	LOC4324859	mRNA	-0.61406	6.93717e-05					GO:0005886///plasma membrane+++GO:0005829///cytosol	GO:0005089///Rho guanyl-nucleotide exchange factor activity
107276357	LOC107276357	mRNA	-0.392464	4.31363e-11
9270570	LOC9270570	mRNA	-0.737281	0.00215267	04626///Plant-pathogen interaction				GO:0005886///plasma membrane	GO:0005524///ATP binding+++GO:0043531///ADP binding	GO:0007165///signal transduction+++GO:0006952///defense response	LOC_Os10g04180
4329363	LOC4329363	mRNA	-0.404376	1.86573e-07	00240///Pyrimidine metabolism+++01100///Metabolic pathways			R01668///dCTP nucleotidohydrolase; deoxycytidine dCTP + H2O <=> dCMP + Diphosphate+++R01667///dCDP nucleotidohydrolase dCDP + H2O <=> dCMP + Orthophosphate		GO:0047429///nucleoside-triphosphate diphosphatase activity	GO:0009143///nucleoside triphosphate catabolic process
107276576	LOC107276576	mRNA	-0.798515	0.000931873						GO:0003755///peptidyl-prolyl cis-trans isomerase activity
4329656	LOC4329656	mRNA	-0.95197	4.13164e-06					GO:0005829///cytosol	GO:0016597///amino acid binding		LOC_Os02g34990
9266560	LOC9266560	mRNA	-0.338796	0.00015078	04137///Mitophagy - animal				GO:0031307///integral component of mitochondrial outer membrane	GO:0004843///thiol-dependent ubiquitin-specific protease activity+++GO:0036459///thiol-dependent ubiquitinyl hydrolase activity	GO:0006511///ubiquitin-dependent protein catabolic process+++GO:0016579///protein deubiquitination	LOC_Os04g34984
9269513	LOC9269513	mRNA	-0.314455	0.00604634					GO:0005623///cell+++GO:0016021///integral component of membrane+++GO:0016020///membrane	GO:0003756///protein disulfide isomerase activity	GO:0045454///cell redox homeostasis	LOC_Os12g35640
4345471	LOC4345471	mRNA	-1.01071	0.000882943					GO:0016021///integral component of membrane			LOC_Os08g30020
9268269	LOC9268269	mRNA	-0.350383	0.0403921					GO:0016021///integral component of membrane			LOC_Os05g11010
9272513	LOC9272513	mRNA	-0.440068	0.000101991								LOC_Os12g06290
4325650	LOC4325650	mRNA	-0.698352	1.10274e-18					GO:0005634///nucleus	GO:0003677///DNA binding+++GO:0003700///DNA-binding transcription factor activity	GO:0006351///transcription, DNA-templated	LOC_Os01g49830
4338946	LOC4338946	mRNA	-0.881252	1.44145e-18						GO:2001070///starch binding		LOC_Os05g37450
4344686	LOC4344686	mRNA	-0.373156	1.84378e-12	03040///Spliceosome+++03018///RNA degradation		M00397///Lsm 1-7 complex+++M00396///Lsm 2-8 complex+++M00354///Spliceosome, U4/U6.U5 tri-snRNP		GO:0000932///P-body+++GO:0005829///cytosol+++GO:0071013///catalytic step 2 spliceosome+++GO:0046540///U4/U6 x U5 tri-snRNP complex+++GO:0005688///U6 snRNP+++GO:1990726///Lsm1-7-Pat1 complex+++GO:0071011///precatalytic spliceosome	GO:0003723///RNA binding	GO:0006397///mRNA processing
4337896	LOC4337896	mRNA	-0.693937	1.31701e-15					GO:0005886///plasma membrane+++GO:0016021///integral component of membrane+++GO:0009506///plasmodesma	GO:0004674///protein serine/threonine kinase activity+++GO:0005524///ATP binding
4327331	LOC4327331	mRNA	-0.54102	2.29772e-15					GO:0016021///integral component of membrane+++GO:0016020///membrane			LOC_Os01g10080
4332996	LOC4332996	mRNA	-0.673503	0.000190271	00500///Starch and sucrose metabolism+++01100///Metabolic pathways			R02778///Trehalose-6-phosphate phosphohydrolase alpha,alpha'-Trehalose 6-phosphate + H2O <=> alpha,alpha-Trehalose + Orthophosphate		GO:0004805///trehalose-phosphatase activity+++GO:0016787///hydrolase activity+++GO:0003824///catalytic activity	GO:0016311///dephosphorylation+++GO:0005992///trehalose biosynthetic process	LOC_Os03g26910
4327203	LOC4327203	mRNA	-0.500209	1.16945e-34					GO:0009505///plant-type cell wall+++GO:0046658///anchored component of plasma membrane+++GO:0031225///anchored component of membrane+++GO:0005886///plasma membrane+++GO:0005576///extracellular region	GO:0042973///glucan endo-1,3-beta-D-glucosidase activity+++GO:0030247///polysaccharide binding+++GO:0004553///hydrolase activity, hydrolyzing O-glycosyl compounds	GO:0006952///defense response+++GO:0005975///carbohydrate metabolic process+++GO:0071555///cell wall organization
4337888	LOC4337888	mRNA	-0.672012	9.68767e-10	00230///Purine metabolism			R00429///ATP:GTP 3'-diphosphotransferase ATP + GTP <=> AMP + Guanosine 3'-diphosphate 5'-triphosphate	GO:0009507///chloroplast+++GO:0009536///plastid	GO:0016301///kinase activity+++GO:0005524///ATP binding+++GO:0005509///calcium ion binding+++GO:0016740///transferase activity+++GO:0005525///GTP binding+++GO:0008728///GTP diphosphokinase activity+++GO:0000166///nucleotide binding	GO:0016310///phosphorylation+++GO:0015969///guanosine tetraphosphate metabolic process	LOC_Os05g06890
4331910	LOC4331910	mRNA	-1.32418	1.99024e-07					GO:0005634///nucleus	GO:0003700///DNA-binding transcription factor activity+++GO:0003677///DNA binding	GO:0006355///regulation of transcription, DNA-templated+++GO:0006351///transcription, DNA-templated+++GO:0009415///response to water+++GO:0009873///ethylene-activated signaling pathway	LOC_Os03g09170
4339429	LOC4339429	mRNA	-0.533258	1.83938e-08	04112///Cell cycle - Caulobacter				GO:0005759///mitochondrial matrix+++GO:0005739///mitochondrion	GO:0004176///ATP-dependent peptidase activity+++GO:0051082///unfolded protein binding+++GO:0005524///ATP binding	GO:0006457///protein folding+++GO:0006508///proteolysis+++GO:0030163///protein catabolic process	LOC_Os05g45750
4327050	LOC4327050	mRNA	-1.07646	0.0226285					GO:0016021///integral component of membrane			LOC_Os01g57710
4329559	LOC4329559	mRNA	-1.43864	2.71458e-57								LOC_Os02g33070
4336033	LOC4336033	mRNA	-0.930291	1.87923e-11	01100///Metabolic pathways+++00460///Cyanoamino acid metabolism+++00430///Taurine and hypotaurine metabolism+++00480///Glutathione metabolism			R03916///(5-glutamyl)-peptide:amino-acid 5-glutamyltransferase R-S-Glutathione + H2O <=> R-S-Cysteinylglycine + L-Glutamate+++R03867///(5-Glutamyl)-peptide:amino-acid 5-glutamyltransferase Leukotriene C4 + Amino acid <=> Leukotriene D4 + 5-L-Glutamyl amino acid+++R01262///glutathione:L-amino-acid 5-glutamyltransferase Glutathione + L-Amino acid <=> Cys-Gly + (5-L-Glutamyl)-L-amino acid+++R03971//…	GO:0048046///apoplast+++GO:0009506///plasmodesma+++GO:0009505///plant-type cell wall	GO:0102953///hypoglycin A gamma-glutamyl transpeptidase activity+++GO:0103068///leukotriene C4 gamma-glutamyl transferase activity+++GO:0036374///glutathione hydrolase activity+++GO:0016756///glutathione gamma-glutamylcysteinyltransferase activity	GO:0006751///glutathione catabolic process+++GO:0006979///response to oxidative stress	LOC_Os04g38450
4344870	LOC4344870	mRNA	-0.412461	4.39257e-10						GO:0003677///DNA binding+++GO:0008270///zinc ion binding+++GO:0004803///transposase activity	GO:0006313///transposition, DNA-mediated	LOC_Os08g09520
107278000	LOC107278000	mRNA	-0.59272	2.37229e-05	04016///MAPK signaling pathway - plant+++04075///Plant hormone signal transduction				GO:0016021///integral component of membrane+++GO:0005622///intracellular	GO:0046873///metal ion transmembrane transporter activity	GO:0009873///ethylene-activated signaling pathway+++GO:0010104///regulation of ethylene-activated signaling pathway
4330265	LOC4330265	mRNA	-1.65921	1.48379e-280					GO:0016020///membrane+++GO:0005829///cytosol		GO:0009414///response to water deprivation+++GO:0009631///cold acclimation+++GO:0009737///response to abscisic acid	LOC_Os02g44870
9272136	LOC9272136	mRNA	-0.464377	0.00190483								LOC_Os01g08690
4344304	LOC4344304	mRNA	-2.38347	7.74888e-14	04626///Plant-pathogen interaction					GO:0005509///calcium ion binding+++GO:0046872///metal ion binding		LOC_Os07g48340
4332340	LOC4332340	mRNA	-1.08392	1.01388e-59					GO:0016021///integral component of membrane+++GO:0005886///plasma membrane+++GO:0009506///plasmodesma	GO:0004674///protein serine/threonine kinase activity+++GO:0005524///ATP binding		LOC_Os03g15770
9266853	LOC9266853	mRNA	-1.23399	0.00991937								LOC_Os02g19410
4348127	LOC4348127	mRNA	-0.372258	4.79725e-17					GO:0005829///cytosol+++GO:0005634///nucleus+++GO:0005783///endoplasmic reticulum+++GO:0005737///cytoplasm	GO:0003729///mRNA binding+++GO:0043565///sequence-specific DNA binding+++GO:0003682///chromatin binding	GO:1905933///regulation of cell fate determination+++GO:0009909///regulation of flower development+++GO:0045087///innate immune response+++GO:0010468///regulation of gene expression+++GO:0006351///transcription, DNA-templated+++GO:0010439///regulation of glucosinolate biosynthetic process+++GO:0009617///response to bacterium+++GO:0007275///multicellular organism development+++GO:0071395///cellula…	LOC_Os10g06130
4337056	LOC4337056	mRNA	-0.660611	5.40454e-26					GO:0009501///amyloplast+++GO:0009507///chloroplast	GO:2001070///starch binding+++GO:0004373///glycogen (starch) synthase activity	GO:0010021///amylopectin biosynthetic process+++GO:0019252///starch biosynthetic process	LOC_Os04g53310
107278481	LOC107278481	mRNA	-0.729998	0.0234873
4333666	LOC4333666	mRNA	-0.517205	6.81789e-06	04075///Plant hormone signal transduction				GO:0005634///nucleus	GO:0005515///protein binding	GO:0006952///defense response+++GO:0050832///defense response to fungus+++GO:0042742///defense response to bacterium+++GO:2000022///regulation of jasmonic acid mediated signaling pathway	LOC_Os03g46440
4328616	LOC4328616	mRNA	-0.38729	1.15121e-09	04016///MAPK signaling pathway - plant	H00209///Menkes syndrome+++H00856///Distal hereditary motor neuropathies (dHMN)+++H01859///Occipital horn syndrome+++H00210///Wilson disease+++H00455///Spinal muscular atrophy (SMA)		R00086///ATP phosphohydrolase ATP + H2O <=> ADP + Orthophosphate	GO:0005773///vacuole+++GO:0016021///integral component of membrane+++GO:0005774///vacuolar membrane+++GO:0016020///membrane	GO:0016787///hydrolase activity+++GO:0005507///copper ion binding+++GO:0019829///cation-transporting ATPase activity+++GO:0000166///nucleotide binding+++GO:0046872///metal ion binding+++GO:0005524///ATP binding	GO:0099132///ATP hydrolysis coupled cation transmembrane transport+++GO:0006811///ion transport+++GO:0030001///metal ion transport+++GO:0006812///cation transport	LOC_Os02g10290
4346971	LOC4346971	mRNA	-0.62601	6.21357e-06	00561///Glycerolipid metabolism+++04723///Retrograde endocannabinoid signaling+++01100///Metabolic pathways+++04714///Thermogenesis+++04923///Regulation of lipolysis in adipocytes		M00098///Acylglycerol degradation	R01351///1-acylglycerol acylhydrolase 1-Acylglycerol + H2O <=> Glycerol + Fatty acid				LOC_Os09g23150
4336831	LOC4336831	mRNA	-0.534533	6.33879e-05					GO:0005829///cytosol	GO:0004612///phosphoenolpyruvate carboxykinase (ATP) activity+++GO:0005524///ATP binding	GO:0006094///gluconeogenesis	LOC_Os04g50208
4346600	LOC4346600	mRNA	-0.344082	3.559e-11					GO:0005634///nucleus		GO:0050832///defense response to fungus
4344020	LOC4344020	mRNA	-0.781086	2.37741e-28					GO:0005576///extracellular region+++GO:0009505///plant-type cell wall	GO:0052793///pectin acetylesterase activity	GO:0071555///cell wall organization	LOC_Os07g44070
9268074	LOC9268074	mRNA	-0.363327	0.045463					GO:0005634///nucleus	GO:0046872///metal ion binding+++GO:0003700///DNA-binding transcription factor activity+++GO:0044212///transcription regulatory region DNA binding	GO:0006351///transcription, DNA-templated+++GO:0006355///regulation of transcription, DNA-templated	LOC_Os09g29960
4349897	LOC4349897	mRNA	-0.852208	3.09723e-10	00710///Carbon fixation in photosynthetic organisms+++00030///Pentose phosphate pathway+++00051///Fructose and mannose metabolism+++01200///Carbon metabolism+++00680///Methane metabolism+++01130///Biosynthesis of antibiotics+++00010///Glycolysis / Gluconeogenesis+++01120///Microbial metabolism in diverse environments+++01110///Biosynthesis of secondary metabolites+++01230///Biosynthesis of amino …	H01762///Muscle glycogen storage disease+++H01952///Glycogen storage disease type XII+++H00069///Glycogen storage diseases (GSD)+++H00071///Hereditary fructose intolerance	M00001///Glycolysis (Embden-Meyerhof pathway), glucose => pyruvate+++M00003///Gluconeogenesis, oxaloacetate => fructose-6P+++M00167///Reductive pentose phosphate cycle, glyceraldehyde-3P => ribulose-5P+++M00165///Reductive pentose phosphate cycle (Calvin cycle)	R01829///sedoheptulose 1,7-bisphosphate D-glyceraldehyde-3-phosphate-lyase Sedoheptulose 1,7-bisphosphate <=> Glycerone phosphate + D-Erythrose 4-phosphate+++R01070///beta-D-fructose-1,6-bisphosphate D-glyceraldehyde-3-phosphate-lyase (glycerone-phosphate-forming) beta-D-Fructose 1,6-bisphosphate <=> Glycerone phosphate + D-Glyceraldehyde 3-phosphate+++R01068///D-fructose-1,6-bisphosphate D-glyce…	GO:0009507///chloroplast+++GO:0010287///plastoglobule+++GO:0009536///plastid+++GO:0005737///cytoplasm	GO:0016829///lyase activity+++GO:0003824///catalytic activity+++GO:0004332///fructose-bisphosphate aldolase activity	GO:0006096///glycolytic process+++GO:0006094///gluconeogenesis	LOC_Os11g07020
4341490	LOC4341490	mRNA	-0.348088	7.12921e-09
4345316	LOC4345316	mRNA	-0.439798	1.42094e-09					GO:0005739///mitochondrion+++GO:0001405///PAM complex, Tim23 associated import motor+++GO:0005759///mitochondrial matrix	GO:0051087///chaperone binding+++GO:0000774///adenyl-nucleotide exchange factor activity+++GO:0005524///ATP binding+++GO:0051082///unfolded protein binding+++GO:0042803///protein homodimerization activity+++GO:0005507///copper ion binding	GO:0009408///response to heat+++GO:0006457///protein folding+++GO:0009411///response to UV+++GO:0030150///protein import into mitochondrial matrix+++GO:0010286///heat acclimation	LOC_Os08g25090
9267579	LOC9267579	mRNA	-0.569018	2.04114e-12					GO:0016021///integral component of membrane	GO:0004190///aspartic-type endopeptidase activity		LOC_Os01g56930
4344337	LOC4344337	mRNA	-0.50859	8.267e-15							GO:0071249///cellular response to nitrate
4348674	LOC4348674	mRNA	-1.21746	2.04869e-12	04340///Hedgehog signaling pathway+++04341///Hedgehog signaling pathway - fly		M00384///Cul3-SPOP complex					LOC_Os10g29110
4338797	LOC4338797	mRNA	-0.374836	1.26054e-06					GO:0009506///plasmodesma+++GO:0005886///plasma membrane+++GO:0016021///integral component of membrane	GO:0033612///receptor serine/threonine kinase binding+++GO:0004672///protein kinase activity+++GO:0005524///ATP binding+++GO:0016301///kinase activity	GO:0060548///negative regulation of cell death+++GO:0042742///defense response to bacterium+++GO:0031348///negative regulation of defense response	LOC_Os05g34270
4339121	LOC4339121	mRNA	-0.58746	2.78968e-23								LOC_Os05g40220
4336997	LOC4336997	mRNA	-0.370953	0.000567265					GO:0005886///plasma membrane+++GO:0016021///integral component of membrane	GO:0005524///ATP binding+++GO:0004674///protein serine/threonine kinase activity		LOC_Os04g52600
4324094	LOC4324094	mRNA	-0.480179	0.00138064					GO:0005634///nucleus	GO:0003677///DNA binding+++GO:0003700///DNA-binding transcription factor activity	GO:0006351///transcription, DNA-templated+++GO:0045893///positive regulation of transcription, DNA-templated	LOC_Os01g41900
4348996	LOC4348996	mRNA	-0.358508	1.50622e-12						GO:0003723///RNA binding		LOC_Os10g35220
4336279	LOC4336279	mRNA	-0.309362	1.92576e-05						GO:0003723///RNA binding	GO:0000398///mRNA splicing, via spliceosome	LOC_Os04g41910
112936351	LOC112936351	mRNA	-0.388736	0.000229468	03420///Nucleotide excision repair+++03460///Fanconi anemia pathway+++03430///Mismatch repair+++03440///Homologous recombination+++03030///DNA replication		M00288///RPA complex
4332515	LOC4332515	mRNA	-0.678293	1.24907e-11					GO:0005829///cytosol+++GO:0005783///endoplasmic reticulum+++GO:0005773///vacuole	GO:0051082///unfolded protein binding+++GO:0005515///protein binding+++GO:0051087///chaperone binding	GO:0051085///chaperone cofactor-dependent protein refolding	LOC_Os03g18200
4347619	LOC4347619	mRNA	-2.78039	1.46589e-118					GO:0005634///nucleus	GO:0003700///DNA-binding transcription factor activity+++GO:0003677///DNA binding	GO:0006355///regulation of transcription, DNA-templated	LOC_Os09g35020
9267566	LOC9267566	mRNA	-0.496674	3.85171e-17						GO:0004842///ubiquitin-protein transferase activity		LOC_Os02g28720
4324132	LOC4324132	mRNA	-1.21282	0.000104364								LOC_Os01g58130
4347356	LOC4347356	mRNA	-0.450181	4.50596e-11	04918///Thyroid hormone synthesis+++04151///PI3K-Akt signaling pathway+++04657///IL-17 signaling pathway+++04141///Protein processing in endoplasmic reticulum+++04626///Plant-pathogen interaction+++04915///Estrogen signaling pathway				GO:0005739///mitochondrion+++GO:0009507///chloroplast+++GO:0009570///chloroplast stroma+++GO:0005774///vacuolar membrane+++GO:0009941///chloroplast envelope+++GO:0009536///plastid	GO:0051082///unfolded protein binding+++GO:0042803///protein homodimerization activity+++GO:0005524///ATP binding	GO:0009414///response to water deprivation+++GO:0009704///de-etiolation+++GO:0009408///response to heat+++GO:0045037///protein import into chloroplast stroma+++GO:0009651///response to salt stress+++GO:0006457///protein folding+++GO:0010157///response to chlorate	LOC_Os09g29840
4331344	LOC4331344	mRNA	-0.464787	1.30497e-08					GO:0005829///cytosol+++GO:0005634///nucleus	GO:0016787///hydrolase activity+++GO:0016799///hydrolase activity, hydrolyzing N-glycosyl compounds	GO:0009691///cytokinin biosynthetic process	LOC_Os03g01880
4329812	LOC4329812	mRNA	-1.83653	4.86583e-44								LOC_Os02g37480
4329395	LOC4329395	mRNA	-0.411631	0.000471579								LOC_Os02g29130
4339157	LOC4339157	mRNA	-0.313451	1.34532e-14	04072///Phospholipase D signaling pathway+++04144///Endocytosis				GO:0005737///cytoplasm+++GO:0005794///Golgi apparatus	GO:0005525///GTP binding+++GO:0000166///nucleotide binding	GO:0015031///protein transport+++GO:0006471///protein ADP-ribosylation+++GO:0016192///vesicle-mediated transport+++GO:0006886///intracellular protein transport
4324628	LOC4324628	mRNA	-0.809023	0.000807473					GO:0016021///integral component of membrane+++GO:0005886///plasma membrane	GO:0005524///ATP binding+++GO:0004675///transmembrane receptor protein serine/threonine kinase activity	GO:0006468///protein phosphorylation+++GO:0007166///cell surface receptor signaling pathway	LOC_Os01g54700
4334547	LOC4334547	mRNA	-0.33326	3.18439e-10						GO:0004842///ubiquitin-protein transferase activity+++GO:0046872///metal ion binding	GO:0090378///seed trichome elongation	LOC_Os03g59760
4341001	LOC4341001	mRNA	-0.490855	4.98033e-11
4342587	LOC4342587	mRNA	-0.382201	6.54396e-14					GO:0016021///integral component of membrane+++GO:0016020///membrane	GO:0008289///lipid binding		LOC_Os07g08760
4339209	LOC4339209	mRNA	-1.14538	3.03313e-70					GO:0016020///membrane+++GO:0005634///nucleus	GO:0043565///sequence-specific DNA binding+++GO:0003700///DNA-binding transcription factor activity	GO:0006351///transcription, DNA-templated+++GO:0009873///ethylene-activated signaling pathway+++GO:0006952///defense response+++GO:0019760///glucosinolate metabolic process	LOC_Os05g41780
4329575	LOC4329575	mRNA	-0.517756	1.52665e-17								LOC_Os02g33400
4325492	LOC4325492	mRNA	-0.4727	0.0083911	04141///Protein processing in endoplasmic reticulum				GO:0016021///integral component of membrane	GO:0046872///metal ion binding		LOC_Os01g56070
4327405	LOC4327405	mRNA	-0.534512	4.18286e-10						GO:0004848///ureidoglycolate hydrolase activity		LOC_Os01g61670
4342478	LOC4342478	mRNA	-1.32363	8.83561e-157								LOC_Os07g07040
112939605	LOC112939605	mRNA	-0.345985	0.023631						GO:0004190///aspartic-type endopeptidase activity+++GO:0003676///nucleic acid binding	GO:0015074///DNA integration
4345192	LOC4345192	mRNA	-1.14482	2.37867e-21								LOC_Os08g19670
4330793	LOC4330793	mRNA	-1.76509	1.81208e-41					GO:0016020///membrane+++GO:0016021///integral component of membrane	GO:0061630///ubiquitin protein ligase activity	GO:0043161///proteasome-mediated ubiquitin-dependent protein catabolic process	LOC_Os02g52210
4325558	LOC4325558	mRNA	-0.375918	0.00549591								LOC_Os01g11230
9268029	LOC9268029	mRNA	-1.50721	0.00937289					GO:0016020///membrane+++GO:0016021///integral component of membrane			LOC_Os07g40380
9268636	LOC9268636	mRNA	-0.498756	0.000171859	04910///Insulin signaling pathway				GO:0000145///exocyst		GO:0006887///exocytosis+++GO:0015031///protein transport
4336960	LOC4336960	mRNA	-0.392107	2.0807e-07	01100///Metabolic pathways+++01110///Biosynthesis of secondary metabolites+++00904///Diterpenoid biosynthesis			R05092///ent-copalyl-diphosphate diphosphate-lyase ent-Copalyl diphosphate <=> ent-Kaurene + Diphosphate	GO:0009507///chloroplast	GO:0010333///terpene synthase activity+++GO:0016829///lyase activity+++GO:0000287///magnesium ion binding	GO:0009686///gibberellin biosynthetic process	LOC_Os04g52230
4330329	LOC4330329	mRNA	-2.38005	4.32755e-35								LOC_Os02g45780
4330727	LOC4330727	mRNA	-1.10395	2.30321e-28					GO:0005634///nucleus+++GO:0005737///cytoplasm+++GO:0019005///SCF ubiquitin ligase complex	GO:0031625///ubiquitin protein ligase binding	GO:0016567///protein ubiquitination+++GO:0030162///regulation of proteolysis+++GO:0043161///proteasome-mediated ubiquitin-dependent protein catabolic process	LOC_Os02g51350
107279145	LOC107279145	mRNA	-0.377242	0.00363644
9270317	LOC9270317	mRNA	-1.31351	0.0363401								LOC_Os01g52570
4325639	LOC4325639	mRNA	-0.320005	0.0152427					GO:0005634///nucleus	GO:0003824///catalytic activity	GO:0009058///biosynthetic process	LOC_Os01g49670
4336879	LOC4336879	mRNA	-0.612268	4.10746e-26					GO:0005634///nucleus	GO:0005524///ATP binding	GO:0006351///transcription, DNA-templated+++GO:0032502///developmental process+++GO:0006355///regulation of transcription, DNA-templated	LOC_Os04g51190
4348488	LOC4348488	mRNA	-0.975262	2.9349e-07								LOC_Os10g22980
4330779	LOC4330779	mRNA	-1.64215	5.40345e-10					GO:0005829///cytosol+++GO:0005794///Golgi apparatus+++GO:0048046///apoplast+++GO:0005615///extracellular space+++GO:0009505///plant-type cell wall+++GO:0005618///cell wall+++GO:0009506///plasmodesma
4330293	LOC4330293	mRNA	-0.556864	1.52902e-06					GO:0005634///nucleus	GO:0003677///DNA binding+++GO:0046872///metal ion binding	GO:0006355///regulation of transcription, DNA-templated	LOC_Os02g45200
4351242	LOC4351242	mRNA	-0.466938	2.44464e-19					GO:0030981///cortical microtubule cytoskeleton+++GO:0005737///cytoplasm+++GO:0005886///plasma membrane		GO:0030865///cortical cytoskeleton organization+++GO:0000913///preprophase band assembly+++GO:0000226///microtubule cytoskeleton organization	LOC_Os12g01170
9268995	LOC9268995	mRNA	-1.33729	0.0261672						GO:0046983///protein dimerization activity
4336428	LOC4336428	mRNA	-0.309795	0.00393638						GO:0016787///hydrolase activity	GO:0008152///metabolic process
4336884	LOC4336884	mRNA	-0.379442	0.000418973					GO:0009507///chloroplast		GO:0016554///cytidine to uridine editing+++GO:0006397///mRNA processing	LOC_Os04g51280
4330788	LOC4330788	mRNA	-1.98956	5.05777e-10								LOC_Os02g52170
4333121	LOC4333121	mRNA	-4.39173	2.97351e-48	01100///Metabolic pathways+++00520///Amino sugar and nucleotide sugar metabolism+++04016///MAPK signaling pathway - plant			R02334///[1,4-(N-Acetyl-beta-D-glucosaminyl)]n glycanohydrolase Chitin + H2O <=> Chitobiose + Chitin+++R01206///[1,4-(N-Acetyl-beta-D-glucosaminyl)]n glycanohydrolase Chitin + H2O <=> N-Acetyl-D-glucosamine + Chitin		GO:0016231///beta-N-acetylglucosaminidase activity+++GO:0008843///endochitinase activity+++GO:0008061///chitin binding+++GO:0016787///hydrolase activity+++GO:0004568///chitinase activity+++GO:0016798///hydrolase activity, acting on glycosyl bonds	GO:0000272///polysaccharide catabolic process+++GO:0016998///cell wall macromolecule catabolic process+++GO:0008152///metabolic process+++GO:0006040///amino sugar metabolic process+++GO:0006032///chitin catabolic process+++GO:0005975///carbohydrate metabolic process+++GO:0006952///defense response+++GO:0050832///defense response to fungus	LOC_Os03g30470
4332581	LOC4332581	mRNA	-1.81739	2.4812e-284						GO:0046872///metal ion binding
4330975	LOC4330975	mRNA	-0.882979	1.54245e-38	01100///Metabolic pathways+++00520///Amino sugar and nucleotide sugar metabolism			R01385///UDP-glucuronate 4-epimerase UDP-glucuronate <=> UDP-D-galacturonate	GO:0005768///endosome+++GO:0016021///integral component of membrane+++GO:0005802///trans-Golgi network+++GO:0005794///Golgi apparatus+++GO:0032580///Golgi cisterna membrane	GO:0050378///UDP-glucuronate 4-epimerase activity	GO:0050832///defense response to fungus+++GO:0050829///defense response to Gram-negative bacterium+++GO:0033481///galacturonate biosynthetic process	LOC_Os02g54890
4333686	LOC4333686	mRNA	-0.381767	1.37525e-05	01100///Metabolic pathways+++00563///Glycosylphosphatidylinositol (GPI)-anchor biosynthesis	H01489///Inherited glycosylphosphatidylinositol (GPI) deficiencies+++H01127///PIGM-congenital disorder of glycosylation (PIGM-CDG)	M00065///GPI-anchor biosynthesis, core oligosaccharide	R05919///Dolichyl phosphate D-mannose + G00145 <=> Dolichyl phosphate + G00146	GO:0016021///integral component of membrane+++GO:0005789///endoplasmic reticulum membrane	GO:0016758///transferase activity, transferring hexosyl groups	GO:0006506///GPI anchor biosynthetic process	LOC_Os03g46750
4330201	LOC4330201	mRNA	-0.396904	1.35907e-23	04141///Protein processing in endoplasmic reticulum				GO:0005634///nucleus+++GO:0005737///cytoplasm	GO:0051082///unfolded protein binding+++GO:0005524///ATP binding+++GO:0031072///heat shock protein binding+++GO:0046872///metal ion binding	GO:0006952///defense response+++GO:0009408///response to heat+++GO:0016032///viral process+++GO:0006457///protein folding	LOC_Os02g43930
4332236	LOC4332236	mRNA	-1.38193	7.69666e-08	00062///Fatty acid elongation+++01110///Biosynthesis of secondary metabolites		M00415///Fatty acid biosynthesis, elongation, endoplasmic reticulum	R10825///very-long-chain acyl-CoA:malonyl-CoA C-acyltransferase (decarboxylating) Very-long-chain acyl-CoA + Malonyl-CoA <=> Very-long-chain 3-oxoacyl-CoA + CO2 + CoA+++R09419///acyl-CoA:malonyl-CoA C-acyltransferase (decarboxylating) Malonyl-CoA + Acyl-CoA <=> 3-Oxoacyl-CoA + CoA + CO2	GO:0016020///membrane+++GO:0022626///cytosolic ribosome+++GO:0005783///endoplasmic reticulum+++GO:0005789///endoplasmic reticulum membrane+++GO:0016021///integral component of membrane	GO:0102337///3-oxo-cerotoyl-CoA synthase activity+++GO:0102336///3-oxo-arachidoyl-CoA synthase activity+++GO:0009922///fatty acid elongase activity+++GO:0102756///very-long-chain 3-ketoacyl-CoA synthase activity+++GO:0102338///3-oxo-lignoceronyl-CoA synthase activity	GO:0006633///fatty acid biosynthetic process+++GO:0009409///response to cold+++GO:0009416///response to light stimulus+++GO:0010025///wax biosynthetic process	LOC_Os03g14170
4335640	LOC4335640	mRNA	-0.526838	1.75756e-23					GO:0009505///plant-type cell wall	GO:0005524///ATP binding+++GO:0019887///protein kinase regulator activity	GO:0042128///nitrate assimilation+++GO:0005975///carbohydrate metabolic process+++GO:0006633///fatty acid biosynthetic process	LOC_Os04g31340
4327387	LOC4327387	mRNA	-0.670586	9.41886e-10					GO:0005618///cell wall+++GO:0005576///extracellular region			LOC_Os01g62260
4326037	LOC4326037	mRNA	-0.594739	7.04142e-32								LOC_Os01g03060
4325952	LOC4325952	mRNA	-0.71172	5.64722e-06						GO:0016829///lyase activity		LOC_Os01g41270
4339999	LOC4339999	mRNA	-0.337833	0.000114308		H00266///Hereditary spastic paraplegia (SPG)				GO:0005524///ATP binding		LOC_Os06g03940
4349997	LOC4349997	mRNA	-0.422243	1.45026e-07					GO:0005634///nucleus	GO:0003677///DNA binding	GO:0006355///regulation of transcription, DNA-templated+++GO:0006351///transcription, DNA-templated	LOC_Os11g09160
4343644	LOC4343644	mRNA	-0.592912	7.81248e-20	04626///Plant-pathogen interaction				GO:0005634///nucleus+++GO:0016020///membrane+++GO:0005737///cytoplasm	GO:0000166///nucleotide binding+++GO:0004674///protein serine/threonine kinase activity+++GO:0009931///calcium-dependent protein serine/threonine kinase activity+++GO:0004672///protein kinase activity+++GO:0046872///metal ion binding+++GO:0005524///ATP binding+++GO:0005509///calcium ion binding+++GO:0004683///calmodulin-dependent protein kinase activity+++GO:0016301///kinase activity+++GO:0016740…	GO:0035556///intracellular signal transduction+++GO:0009738///abscisic acid-activated signaling pathway+++GO:0018105///peptidyl-serine phosphorylation+++GO:0006468///protein phosphorylation+++GO:0016310///phosphorylation	LOC_Os07g38120
4339356	LOC4339356	mRNA	-0.920693	2.1761e-15	01100///Metabolic pathways+++00040///Pentose and glucuronate interconversions		M00081///Pectin degradation	R02362///Pectin pectylhydrolase Pectin + n H2O <=> n Methanol + Pectate	GO:0005618///cell wall+++GO:0005576///extracellular region+++GO:0005737///cytoplasm	GO:0030599///pectinesterase activity+++GO:0045330///aspartyl esterase activity	GO:0042545///cell wall modification+++GO:0045490///pectin catabolic process
9268161	LOC9268161	mRNA	-0.949913	5.37462e-07								LOC_Os05g46470
4334233	LOC4334233	mRNA	-0.631933	3.72968e-05	00592///alpha-Linolenic acid metabolism+++01100///Metabolic pathways+++01110///Biosynthesis of secondary metabolites		M00113///Jasmonic acid biosynthesis	R07863///(9Z,11E,15Z)-(13S)-hydroperoxyoctadeca-9,11,15-trienoate 12,13-hydro-lyase [(9Z,15Z)-(13S)-12,13-epoxyoctadeca-9,11,15-trienoate-forming] 13(S)-HPOT <=> (9Z,15Z)-(13S)-12,13-Epoxyoctadeca-9,11,15-trienoic acid + H2O+++R07865///9(S)-HPOT <=> 9,10-EOT + H2O	GO:0009579///thylakoid+++GO:0009536///plastid+++GO:0005739///mitochondrion+++GO:0009534///chloroplast thylakoid+++GO:0016020///membrane+++GO:0009941///chloroplast envelope+++GO:0009507///chloroplast+++GO:0031969///chloroplast membrane+++GO:0009535///chloroplast thylakoid membrane+++GO:0010287///plastoglobule	GO:0016829///lyase activity+++GO:0046872///metal ion binding+++GO:0047987///hydroperoxide dehydratase activity+++GO:0009978///allene oxide synthase activity+++GO:0020037///heme binding+++GO:0005506///iron ion binding+++GO:0004497///monooxygenase activity+++GO:0016705///oxidoreductase activity, acting on paired donors, with incorporation or reduction of molecular oxygen	GO:0006631///fatty acid metabolic process+++GO:0009753///response to jasmonic acid+++GO:0031408///oxylipin biosynthetic process+++GO:0006629///lipid metabolic process+++GO:0050832///defense response to fungus+++GO:0009620///response to fungus+++GO:0055114///oxidation-reduction process+++GO:0006633///fatty acid biosynthetic process+++GO:0009695///jasmonic acid biosynthetic process+++GO:0031407///o…	LOC_Os03g55800
4339202	LOC4339202	mRNA	-0.417836	4.75589e-05								LOC_Os05g41620
4325322	LOC4325322	mRNA	-1.56865	3.73063e-60						GO:0016788///hydrolase activity, acting on ester bonds		LOC_Os01g42730
9266041	LOC9266041	mRNA	-1.24611	5.17789e-19					GO:0016021///integral component of membrane	GO:0042803///protein homodimerization activity+++GO:0005524///ATP binding+++GO:0004674///protein serine/threonine kinase activity+++GO:0004672///protein kinase activity		LOC_Os05g03620
4346229	LOC4346229	mRNA	-1.06586	0.00235112					GO:0005634///nucleus	GO:0000978///RNA polymerase II proximal promoter sequence-specific DNA binding+++GO:0043565///sequence-specific DNA binding+++GO:0003700///DNA-binding transcription factor activity+++GO:0003677///DNA binding	GO:0006355///regulation of transcription, DNA-templated+++GO:0034605///cellular response to heat+++GO:0061408///positive regulation of transcription from RNA polymerase II promoter in response to heat stress	LOC_Os08g43334
112935988	LOC112935988	mRNA	-0.406981	7.02421e-15					GO:0005737///cytoplasm	GO:0046872///metal ion binding+++GO:0015035///protein disulfide oxidoreductase activity+++GO:0051537///2 iron, 2 sulfur cluster binding+++GO:0009055///electron transfer activity	GO:0045454///cell redox homeostasis	LOC_Os10g35720
4336762	LOC4336762	mRNA	-0.605954	2.48802e-05					GO:0005634///nucleus	GO:0003677///DNA binding+++GO:0044212///transcription regulatory region DNA binding+++GO:0008134///transcription factor binding+++GO:0043565///sequence-specific DNA binding+++GO:0000977///RNA polymerase II regulatory region sequence-specific DNA binding+++GO:0000981///DNA-binding transcription factor activity, RNA polymerase II-specific+++GO:0046983///protein dimerization activity+++GO:0003700///…	GO:0048481///plant ovule development+++GO:0007275///multicellular organism development+++GO:0006355///regulation of transcription, DNA-templated+++GO:0045944///positive regulation of transcription by RNA polymerase II+++GO:0010093///specification of floral organ identity	LOC_Os04g49150
9271699	LOC9271699	mRNA	-0.343134	1.08746e-07								LOC_Os06g45090
4344694	LOC4344694	mRNA	-1.42469	1.71127e-48					GO:0016021///integral component of membrane	GO:0022857///transmembrane transporter activity	GO:0008643///carbohydrate transport+++GO:0055062///phosphate ion homeostasis	LOC_Os08g06010
4324515	LOC4324515	mRNA	-0.604686	0.00939356								LOC_Os01g05660
4340426	LOC4340426	mRNA	-0.908324	3.20777e-16					GO:0009570///chloroplast stroma	GO:0005504///fatty acid binding+++GO:0016872///intramolecular lyase activity	GO:0006631///fatty acid metabolic process	LOC_Os06g10210
4347684	LOC4347684	mRNA	-0.341325	0.0141365					GO:0005886///plasma membrane	GO:0004675///transmembrane receptor protein serine/threonine kinase activity+++GO:0005524///ATP binding	GO:0007166///cell surface receptor signaling pathway+++GO:0006952///defense response+++GO:0006468///protein phosphorylation	LOC_Os09g36320
4326321	LOC4326321	mRNA	-1.1984	1.64092e-28					GO:0005886///plasma membrane+++GO:0005768///endosome	GO:0003924///GTPase activity+++GO:0005525///GTP binding	GO:0015031///protein transport	LOC_Os01g47730
4345862	LOC4345862	mRNA	-0.442062	0.00767248					GO:0016021///integral component of membrane			LOC_Os08g37690
4344479	LOC4344479	mRNA	-0.454694	8.68692e-08		H00436///Osteopetrosis			GO:0016021///integral component of membrane	GO:0008375///acetylglucosaminyltransferase activity		LOC_Os08g01890
4325091	LOC4325091	mRNA	-0.497193	1.70346e-07					GO:0005886///plasma membrane+++GO:0016021///integral component of membrane	GO:0005524///ATP binding+++GO:0004674///protein serine/threonine kinase activity+++GO:0042277///peptide binding+++GO:0001653///peptide receptor activity+++GO:0004714///transmembrane receptor protein tyrosine kinase activity+++GO:0017046///peptide hormone binding	GO:1902025///nitrate import+++GO:2000280///regulation of root development+++GO:0090548///response to nitrate starvation+++GO:0010555///response to mannitol+++GO:0048831///regulation of shoot system development+++GO:0006970///response to osmotic stress	LOC_Os01g65650
107276748	LOC107276748	mRNA	-3.66599	9.92406e-15					GO:0005886///plasma membrane+++GO:0016021///integral component of membrane	GO:0061630///ubiquitin protein ligase activity+++GO:0046872///metal ion binding+++GO:0004842///ubiquitin-protein transferase activity	GO:0000209///protein polyubiquitination+++GO:0048364///root development+++GO:0016567///protein ubiquitination+++GO:0051301///cell division+++GO:0043161///proteasome-mediated ubiquitin-dependent protein catabolic process
4331029	LOC4331029	mRNA	-0.305624	7.00931e-08					GO:0016021///integral component of membrane			LOC_Os02g55590
4350844	LOC4350844	mRNA	-1.36821	0.0195024					GO:0010287///plastoglobule+++GO:0016020///membrane+++GO:0031977///thylakoid lumen+++GO:0005634///nucleus+++GO:0009535///chloroplast thylakoid membrane+++GO:0009579///thylakoid+++GO:0009534///chloroplast thylakoid+++GO:0005886///plasma membrane+++GO:0009941///chloroplast envelope+++GO:0009507///chloroplast		GO:0010193///response to ozone+++GO:0042742///defense response to bacterium+++GO:0009658///chloroplast organization	LOC_Os11g38260
4334309	LOC4334309	mRNA	-0.443281	1.60247e-14	04540///Gap junction+++04145///Phagosome	H00271///Polymicrogyria+++H01740///Macrothrombocytopenia+++H01881///Complex cortical dysplasia with other brain malformations+++H00679///Hypomyelinating leukodystrophy+++H01579///Congenital symmetric circumferential skin creases+++H00838///Congenital fibrosis of the extraocular muscles (CFEOM)+++H01897///Oocyte maturation defect			GO:0005874///microtubule+++GO:0005856///cytoskeleton+++GO:0005737///cytoplasm	GO:0000166///nucleotide binding+++GO:0003924///GTPase activity+++GO:0005525///GTP binding+++GO:0005200///structural constituent of cytoskeleton	GO:0007017///microtubule-based process+++GO:0000278///mitotic cell cycle+++GO:0000226///microtubule cytoskeleton organization	LOC_Os03g56810
4329137	LOC4329137	mRNA	-0.352603	4.55165e-05					GO:0016021///integral component of membrane+++GO:0005783///endoplasmic reticulum+++GO:0005886///plasma membrane+++GO:0005773///vacuole	GO:0008289///lipid binding	GO:0006869///lipid transport
4338424	LOC4338424	mRNA	-1.52862	1.26412e-09								LOC_Os05g25920
4326412	LOC4326412	mRNA	-0.445288	5.81035e-11					GO:0016021///integral component of membrane+++GO:0005886///plasma membrane	GO:0005227///calcium activated cation channel activity	GO:0006812///cation transport	LOC_Os01g35050
107279348	LOC107279348	mRNA	-0.360315	0.00322633	03420///Nucleotide excision repair+++03460///Fanconi anemia pathway+++03430///Mismatch repair+++03440///Homologous recombination+++03030///DNA replication		M00288///RPA complex
4338062	LOC4338062	mRNA	-0.831105	1.00186e-29
4337508	LOC4337508	mRNA	-0.613758	0.00782991					GO:0016021///integral component of membrane	GO:0016757///transferase activity, transferring glycosyl groups		LOC_Os04g59520
4328314	LOC4328314	mRNA	-0.35096	0.00468807						GO:0003676///nucleic acid binding		LOC_Os02g05710
4337337	LOC4337337	mRNA	-0.780266	4.44183e-72						GO:0004430///1-phosphatidylinositol 4-kinase activity+++GO:0005524///ATP binding		LOC_Os04g57300
4343837	LOC4343837	mRNA	-1.78047	0							GO:0051513///regulation of monopolar cell growth	LOC_Os07g41200
4327907	LOC4327907	mRNA	-0.389296	0.0137329					GO:0031966///mitochondrial membrane+++GO:0016021///integral component of membrane+++GO:0005886///plasma membrane	GO:0004252///serine-type endopeptidase activity+++GO:0046872///metal ion binding
4346126	LOC4346126	mRNA	-0.339966	0.0450754								LOC_Os08g41840
9268154	LOC9268154	mRNA	-1.2111	0.00615254	01200///Carbon metabolism+++01120///Microbial metabolism in diverse environments+++00630///Glyoxylate and dicarboxylate metabolism+++01100///Metabolic pathways+++00620///Pyruvate metabolism+++01110///Biosynthesis of secondary metabolites		M00012///Glyoxylate cycle	R00472///acetyl-CoA:glyoxylate C-acetyltransferase (thioester-hydrolysing, carboxymethyl-forming); L-Malate (S)-Malate + CoA <=> Acetyl-CoA + H2O + Glyoxylate	GO:0005777///peroxisome+++GO:0005737///cytoplasm+++GO:0009514///glyoxysome	GO:0004474///malate synthase activity+++GO:0016740///transferase activity+++GO:0003824///catalytic activity	GO:0006097///glyoxylate cycle+++GO:0006099///tricarboxylic acid cycle	LOC_Os04g40990
4329355	LOC4329355	mRNA	-0.530912	0.0028558								LOC_Os02g27480
107278099	LOC107278099	mRNA	-1.87475	0.00662036
4343570	LOC4343570	mRNA	-0.549128	0.000567265	00195///Photosynthesis+++01100///Metabolic pathways		M00162///Cytochrome b6f complex	R03817///plastoquinol:oxidized-plastocyanin oxidoreductase Plastoquinol + 2 Oxidized plastocyanin <=> Plastoquinone + 2 Reduced plastocyanin+++R08409///Plastoquinol:oxidized-plastocyanin oxidoreductase Plastoquinol-9 + 2 Oxidized plastocyanin <=> Plastoquinone-9 + 2 Reduced plastocyanin	GO:0016020///membrane+++GO:0009507///chloroplast+++GO:0009536///plastid+++GO:0005886///plasma membrane+++GO:0009535///chloroplast thylakoid membrane+++GO:0042651///thylakoid membrane+++GO:0016021///integral component of membrane+++GO:0009579///thylakoid	GO:0016679///oxidoreductase activity, acting on diphenols and related substances as donors+++GO:0051537///2 iron, 2 sulfur cluster binding+++GO:0051536///iron-sulfur cluster binding+++GO:0016491///oxidoreductase activity+++GO:0045158///electron transporter, transferring electrons within cytochrome b6/f complex of photosystem II activity+++GO:0046872///metal ion binding+++GO:0009496///plastoquinol…	GO:0022900///electron transport chain+++GO:0055114///oxidation-reduction process+++GO:0015979///photosynthesis	LOC_Os07g37030
4334624	LOC4334624	mRNA	-0.483222	5.96293e-12						GO:0008276///protein methyltransferase activity+++GO:0003676///nucleic acid binding		LOC_Os03g60920
4332972	LOC4332972	mRNA	-0.812549	1.48283e-08					GO:0005634///nucleus	GO:0003677///DNA binding+++GO:0046983///protein dimerization activity	GO:0006355///regulation of transcription, DNA-templated+++GO:0006351///transcription, DNA-templated	LOC_Os03g26210
4351360	LOC4351360	mRNA	-0.54279	5.15568e-06	04217///Necroptosis+++04144///Endocytosis	H01202///Cataract	M00412///ESCRT-III complex		GO:0000815///ESCRT III complex		GO:0070676///intralumenal vesicle formation+++GO:0015031///protein transport+++GO:0007034///vacuolar transport	LOC_Os12g02830
4348628	LOC4348628	mRNA	-0.685865	0.000336972					GO:0005737///cytoplasm	GO:0004252///serine-type endopeptidase activity
4325320	LOC4325320	mRNA	-0.403173	1.3878e-15					GO:0005634///nucleus		GO:0006952///defense response+++GO:0031349///positive regulation of defense response+++GO:0045927///positive regulation of growth	LOC_Os01g42710
4331047	LOC4331047	mRNA	-1.08357	2.11162e-05					GO:0005794///Golgi apparatus+++GO:0030136///clathrin-coated vesicle+++GO:0005905///clathrin-coated pit+++GO:0005886///plasma membrane	GO:0005545///1-phosphatidylinositol binding+++GO:0030276///clathrin binding	GO:0006897///endocytosis+++GO:0048268///clathrin coat assembly
4343684	LOC4343684	mRNA	-0.568031	3.77275e-34
4342717	LOC4342717	mRNA	-0.309646	0.00369612					GO:0009507///chloroplast	GO:0003723///RNA binding+++GO:0004519///endonuclease activity+++GO:0003735///structural constituent of ribosome	GO:0009451///RNA modification+++GO:0009793///embryo development ending in seed dormancy+++GO:0010239///chloroplast mRNA processing+++GO:0008380///RNA splicing	LOC_Os07g11280
4341661	LOC4341661	mRNA	-0.475136	0.00545954					GO:0005634///nucleus	GO:0003677///DNA binding	GO:0006355///regulation of transcription, DNA-templated	LOC_Os06g43860
4340809	LOC4340809	mRNA	-0.320101	0.00517801					GO:0016021///integral component of membrane
4328024	LOC4328024	mRNA	-0.32872	7.10559e-17	03040///Spliceosome	H00527///Retinitis pigmentosa (RP)	M00355///Spliceosome, 35S U5-snRNP+++M00354///Spliceosome, U4/U6.U5 tri-snRNP		GO:0016020///membrane+++GO:0005730///nucleolus+++GO:0005681///spliceosomal complex+++GO:0005829///cytosol	GO:0004386///helicase activity+++GO:0003723///RNA binding+++GO:0005524///ATP binding	GO:0006397///mRNA processing+++GO:0010228///vegetative to reproductive phase transition of meristem+++GO:0008380///RNA splicing	LOC_Os02g01740
4339810	LOC4339810	mRNA	-0.329516	3.7982e-12	03040///Spliceosome+++03018///RNA degradation		M00396///Lsm 2-8 complex+++M00354///Spliceosome, U4/U6.U5 tri-snRNP		GO:0005688///U6 snRNP+++GO:0071011///precatalytic spliceosome+++GO:0046540///U4/U6 x U5 tri-snRNP complex	GO:0003723///RNA binding	GO:0000398///mRNA splicing, via spliceosome
4344813	LOC4344813	mRNA	-0.395418	0.0401561					GO:0005622///intracellular	GO:0008270///zinc ion binding		LOC_Os08g08120
4324642	LOC4324642	mRNA	-0.681176	0.00271237	01100///Metabolic pathways+++00240///Pyrimidine metabolism+++00983///Drug metabolism - other enzymes			R08221///5'-deoxy-5-fluorocytidine aminohydrolase 5'-Deoxy-5-fluorocytidine + H2O <=> 5'-Deoxy-5-fluorouridine + Ammonia+++R02485///deoxycytidine aminohydrolase Deoxycytidine + H2O <=> Deoxyuridine + Ammonia+++R01878///Cytidine aminohydrolase Cytidine + H2O <=> Uridine + Ammonia
4347585	LOC4347585	mRNA	-1.30752	6.62516e-05					GO:0009534///chloroplast thylakoid			LOC_Os09g34140
4344235	LOC4344235	mRNA	-1.56455	3.08266e-206					GO:0016021///integral component of membrane+++GO:0016020///membrane	GO:0015079///potassium ion transmembrane transporter activity	GO:0071805///potassium ion transmembrane transport+++GO:0006811///ion transport+++GO:0006813///potassium ion transport	LOC_Os07g47350
4324552	LOC4324552	mRNA	-0.528506	0.000191038					GO:0005622///intracellular	GO:0008270///zinc ion binding		LOC_Os01g73150
4341476	LOC4341476	mRNA	-0.516986	3.45464e-29	04016///MAPK signaling pathway - plant+++04075///Plant hormone signal transduction							LOC_Os06g40360
4346483	LOC4346483	mRNA	-0.75673	0.00549366						GO:0061630///ubiquitin protein ligase activity	GO:0000209///protein polyubiquitination+++GO:0043161///proteasome-mediated ubiquitin-dependent protein catabolic process
4330462	LOC4330462	mRNA	-1.07258	4.8764e-11					GO:0005634///nucleus	GO:0003700///DNA-binding transcription factor activity+++GO:0044212///transcription regulatory region DNA binding+++GO:0046983///protein dimerization activity	GO:0006355///regulation of transcription, DNA-templated+++GO:0006351///transcription, DNA-templated
4338793	LOC4338793	mRNA	-0.749052	1.68234e-09						GO:0043531///ADP binding		LOC_Os05g34220
4325617	LOC4325617	mRNA	-2.49477	1.68689e-59	04962///Vasopressin-regulated water reabsorption				GO:0005874///microtubule+++GO:0005737///cytoplasm+++GO:0030286///dynein complex	GO:0003774///motor activity	GO:0007017///microtubule-based process	LOC_Os01g55510
[truncated: 1,125 more rows]

## Sheet: UP
Gene ID	Gene Symbol	Type	log2 (T1 / C1)	Qvalue ( (T1 / C1))	KEGG Pathway Desc	KEGG Disease Desc	KEGG Module Desc	KEGG Reaction Desc	GO_C Desc	GO_F Desc	GO_P Desc	msu_geneid
[truncated: 2,028 more rows]
