# Supplementary material for: VPB1 Encoding BELL-like Homeodomain Protein Is Involved in Rice Panicle Architecture
Source: Int J Mol Sci. 2021 Jul 24;22(15):7909. doi: 10.3390/ijms22157909 (PMC8348756; doi:10.3390/ijms22157909)
Supplement: Supplementary file 1 [file ijms-22-07909-s001.zip › Table S3 Binding region analysis of the promoter of target genes regulated by VPB1.xls]

## Sheet: UP
Motif ID	Alt ID	Sequence Name	Strand	Start	End	p-value	q-value	Matched Sequence
TFmatrixID_0278		LOC_Os03g05260	+	74	83	7.46e-07	0.855	GGTGACAGCT
TFmatrixID_0278		LOC_Os01g33040	+	132	141	7.46e-07	0.855	GGTGACAGCT
TFmatrixID_0278		LOC_Os07g42924	-	519	528	7.46e-07	0.855	GGTGACAGCT
TFmatrixID_0278		LOC_Os11g05800	-	1304	1313	7.46e-07	0.855	GGTGACAGCT
TFmatrixID_0278		LOC_Os05g19620	+	1901	1910	7.46e-07	0.855	GGTGACAGCT
TFmatrixID_0278		LOC_Os07g35290	-	105	114	1.65e-06	0.855	TGTGACAGCT
TFmatrixID_0278		LOC_Os08g36250	-	447	456	1.65e-06	0.855	TGTGACAGCT
TFmatrixID_0278		LOC_Os09g12310	+	552	561	1.65e-06	0.855	TGTGACAGCT
TFmatrixID_0278		LOC_Os02g13100	-	560	569	1.65e-06	0.855	TGTGACAGCT
TFmatrixID_0278		LOC_Os01g35580	+	994	1003	1.65e-06	0.855	TGTGACAGCT
TFmatrixID_0278		LOC_Os06g22660	-	1722	1731	1.65e-06	0.855	TGTGACAGCT
TFmatrixID_0278		LOC_Os03g07270	-	1803	1812	1.65e-06	0.855	TGTGACAGCT
TFmatrixID_0278		LOC_Os03g60350	-	165	174	2.56e-06	0.855	AGTGACAGCT
TFmatrixID_0278		LOC_Os01g58080	-	233	242	2.56e-06	0.855	AGTGACAGCT
TFmatrixID_0278		LOC_Os03g03600	+	260	269	2.56e-06	0.855	AGTGACAGCT
TFmatrixID_0278		LOC_Os06g51420	+	300	309	2.56e-06	0.855	AGTGACAGCT
TFmatrixID_0278		LOC_Os03g42050	+	388	397	2.56e-06	0.855	AGTGACAGCT
TFmatrixID_0278		LOC_Os05g48220	-	559	568	2.56e-06	0.855	AGTGACAGCT
TFmatrixID_0278		LOC_Os03g21480	-	846	855	2.56e-06	0.855	AGTGACAGCT
TFmatrixID_0278		LOC_Os10g16974	+	944	953	2.56e-06	0.855	AGTGACAGCT
TFmatrixID_0278		LOC_Os01g36390	-	980	989	2.56e-06	0.855	AGTGACAGCT
TFmatrixID_0278		LOC_Os06g09180	-	1003	1012	2.56e-06	0.855	AGTGACAGCT
TFmatrixID_0278		LOC_Os10g05600	+	1149	1158	2.56e-06	0.855	AGTGACAGCT
TFmatrixID_0278		LOC_Os08g21660	+	1722	1731	2.56e-06	0.855	AGTGACAGCT
TFmatrixID_0278		LOC_Os01g47410	+	117	126	3.31e-06	0.855	GGTGACAGGT
TFmatrixID_0278		LOC_Os04g19740	-	463	472	3.31e-06	0.855	GGTGACAGGT
TFmatrixID_0278		LOC_Os01g68650	+	663	672	3.31e-06	0.855	GGTGACAGGT
TFmatrixID_0278		LOC_Os01g65790	+	809	818	3.31e-06	0.855	GGTGACAGGT
TFmatrixID_0278		LOC_Os11g43750	+	1128	1137	3.31e-06	0.855	GGTGACAGGT
TFmatrixID_0278		LOC_Os06g09630	+	1903	1912	3.31e-06	0.855	GGTGACAGGT
TFmatrixID_0278		LOC_Os11g26860	-	45	54	4.22e-06	0.855	TGTGACAGGT
TFmatrixID_0278		LOC_Os12g22030	-	418	427	4.22e-06	0.855	TGTGACAGGT
TFmatrixID_0278		LOC_Os09g24240	-	422	431	4.22e-06	0.855	TGTGACAGGT
TFmatrixID_0278		LOC_Os03g32314	+	466	475	4.22e-06	0.855	TGTGACAGGT
TFmatrixID_0278		LOC_Os01g01190	+	679	688	4.22e-06	0.855	TGTGACAGGT
TFmatrixID_0278		LOC_Os01g63470	-	695	704	4.22e-06	0.855	TGTGACAGGT
TFmatrixID_0278		LOC_Os06g49250	-	890	899	4.22e-06	0.855	TGTGACAGGT
TFmatrixID_0278		LOC_Os08g42450	-	915	924	4.22e-06	0.855	TGTGACAGGT
TFmatrixID_0278		LOC_Os08g06370	-	1579	1588	4.22e-06	0.855	TGTGACAGGT
TFmatrixID_0278		LOC_Os01g60260	-	1585	1594	4.22e-06	0.855	TGTGACAGGT
TFmatrixID_0278		LOC_Os08g20400	-	1598	1607	4.22e-06	0.855	TGTGACAGGT
TFmatrixID_0278		LOC_Os08g41270	-	1754	1763	4.22e-06	0.855	TGTGACAGGT
TFmatrixID_0278		LOC_Os02g03840	+	384	393	4.83e-06	0.878	GGTGACGGCT
TFmatrixID_0278		LOC_Os06g19590	+	420	429	4.83e-06	0.878	GGTGACGGCT
TFmatrixID_0278		LOC_Os02g04740	-	1024	1033	4.83e-06	0.878	GGTGACGGCT
TFmatrixID_0278		LOC_Os07g08710	-	1404	1413	4.83e-06	0.878	GGTGACGGCT
TFmatrixID_0278		LOC_Os08g40100	+	1979	1988	4.83e-06	0.878	GGTGACGGCT
TFmatrixID_0278		LOC_Os07g29620	-	90	99	5.58e-06	0.901	CGTGACAGCT
TFmatrixID_0278		LOC_Os11g05770	-	356	365	5.58e-06	0.901	CGTGACAGCT
TFmatrixID_0278		LOC_Os12g38000	-	706	715	5.58e-06	0.901	CGTGACAGCT
TFmatrixID_0278		LOC_Os12g35350	-	1284	1293	5.58e-06	0.901	CGTGACAGCT
TFmatrixID_0278		LOC_Os01g72020	+	1487	1496	5.28e-06	1	CATGACAGAT	OsBOP1
TFmatrixID_0278		LOC_Os08g01850	-	1602	1611	5.58e-06	0.901	CGTGACAGCT
TFmatrixID_0278		LOC_Os05g45810	-	1684	1693	5.58e-06	0.901	CGTGACAGCT
TFmatrixID_0278		LOC_Os01g13430	+	164	173	6.32e-06	0.938	TATGACAGAT
TFmatrixID_0278		LOC_Os03g04340	+	865	874	6.32e-06	0.938	TATGACAGAT
TFmatrixID_0278		LOC_Os11g04600	+	399	408	6.32e-06	0.938	TATGACAGAT	OsBOP2
TFmatrixID_0278		LOC_Os05g08440	+	193	202	7.23e-06	0.938	GTTGACAGCT
TFmatrixID_0278		LOC_Os01g60190	+	562	571	7.23e-06	0.938	GTTGACAGCT
TFmatrixID_0278		LOC_Os03g07100	+	842	851	7.23e-06	0.938	GTTGACAGCT
TFmatrixID_0278		LOC_Os06g14550	+	1173	1182	7.23e-06	0.938	GTTGACAGCT
TFmatrixID_0278		LOC_Os01g34700	-	1230	1239	7.23e-06	0.938	GTTGACAGCT
TFmatrixID_0278		LOC_Os10g26290	+	1599	1608	7.23e-06	0.938	GTTGACAGCT
TFmatrixID_0278		LOC_Os07g26660	+	1857	1866	7.23e-06	0.938	GTTGACAGCT
TFmatrixID_0278		LOC_Os07g01060	-	119	128	8.14e-06	0.938	AGTGACAGGT
TFmatrixID_0278		LOC_Os06g45020	-	161	170	8.14e-06	0.938	AGTGACAGGT
TFmatrixID_0278		LOC_Os01g60770	-	345	354	8.14e-06	0.938	AGTGACAGGT
TFmatrixID_0278		LOC_Os04g59600	+	1283	1292	8.14e-06	0.938	AGTGACAGGT
TFmatrixID_0278		LOC_Os07g02260	+	1510	1519	8.14e-06	0.938	AGTGACAGGT
TFmatrixID_0278		LOC_Os08g42040	-	1783	1792	8.14e-06	0.938	AGTGACAGGT
TFmatrixID_0278		LOC_Os06g10660	-	1930	1939	8.14e-06	0.938	AGTGACAGGT
TFmatrixID_0278		LOC_Os08g41880	-	1939	1948	8.14e-06	0.938	AGTGACAGGT
TFmatrixID_0278		LOC_Os04g44150	+	159	168	9.25e-06	0.938	TTTGACAGCT
TFmatrixID_0278		LOC_Os02g06410	+	318	327	9.25e-06	0.938	TTTGACAGCT
TFmatrixID_0278		LOC_Os01g11350	+	370	379	9.25e-06	0.938	TTTGACAGCT
TFmatrixID_0278		LOC_Os04g33050	-	414	423	9.25e-06	0.938	TTTGACAGCT
TFmatrixID_0278		LOC_Os02g06910	+	588	597	9.25e-06	0.938	TTTGACAGCT
TFmatrixID_0278		LOC_Os01g43060	-	833	842	9.25e-06	0.938	TTTGACAGCT
TFmatrixID_0278		LOC_Os01g13030	-	903	912	9.25e-06	0.938	TTTGACAGCT
TFmatrixID_0278		LOC_Os01g73420	-	1295	1304	9.25e-06	0.938	TTTGACAGCT
TFmatrixID_0278		LOC_Os01g13260	-	1365	1374	9.25e-06	0.938	TTTGACAGCT
TFmatrixID_0278		LOC_Os07g41090	+	1766	1775	9.25e-06	0.938	TTTGACAGCT
TFmatrixID_0278		LOC_Os01g47040	-	1938	1947	9.25e-06	0.938	TTTGACAGCT
TFmatrixID_0278		LOC_Os05g23530	-	1955	1964	9.25e-06	0.938	TTTGACAGCT
TFmatrixID_0278		LOC_Os01g60280	-	1885	1894	9.99e-06	0.945	AGTGACGGCT
TFmatrixID_0278		LOC_Os10g42660	-	1929	1938	9.99e-06	0.945	AGTGACGGCT
TFmatrixID_0278		LOC_Os09g29930	-	1773	1782	1.06e-05	0.945	GGTGACGGGT
TFmatrixID_0278		LOC_Os09g38510	-	1844	1853	1.06e-05	0.945	GGTGACGGGT
TFmatrixID_0278		LOC_Os11g05290	+	710	719	1.17e-05	0.945	ATTGACAGCT
TFmatrixID_0278		LOC_Os11g17390	+	899	908	1.17e-05	0.945	ATTGACAGCT
TFmatrixID_0278		LOC_Os05g46580	-	1064	1073	1.17e-05	0.945	ATTGACAGCT
TFmatrixID_0278		LOC_Os09g13940	+	1933	1942	1.17e-05	0.945	ATTGACAGCT
TFmatrixID_0278		LOC_Os09g31430	-	1930	1939	1.17e-05	0.945	ATTGACAGCT
TFmatrixID_0278		LOC_Os07g32340	+	364	373	1.25e-05	0.945	CGTGACAGGT
TFmatrixID_0278		LOC_Os02g12380	+	492	501	1.25e-05	0.945	CGTGACAGGT
TFmatrixID_0278		LOC_Os10g33970	+	610	619	1.25e-05	0.945	CGTGACAGGT
TFmatrixID_0278		LOC_Os12g33300	-	1657	1666	1.25e-05	0.945	CGTGACAGGT
TFmatrixID_0278		LOC_Os06g03820	+	84	93	1.32e-05	0.945	TGTGACGGGT
TFmatrixID_0278		LOC_Os01g67860	-	677	686	1.32e-05	0.945	TGTGACGGGT
TFmatrixID_0278		LOC_Os01g10490	+	833	842	1.32e-05	0.945	TGTGACGGGT
TFmatrixID_0278		LOC_Os08g21760	+	601	610	1.41e-05	0.945	GTTGACAGGT
TFmatrixID_0278		LOC_Os05g47890	-	835	844	1.41e-05	0.945	GTTGACAGGT
TFmatrixID_0278		LOC_Os12g07380	-	895	904	1.41e-05	0.945	GTTGACAGGT
TFmatrixID_0278		LOC_Os01g14850	-	915	924	1.41e-05	0.945	GTTGACAGGT
TFmatrixID_0278		LOC_Os09g36820	+	1075	1084	1.41e-05	0.945	GTTGACAGGT
TFmatrixID_0278		LOC_Os02g39820	+	1307	1316	1.41e-05	0.945	GTTGACAGGT
TFmatrixID_0278		LOC_Os01g05670	-	1768	1777	1.41e-05	0.945	GTTGACAGGT
TFmatrixID_0278		LOC_Os04g45834	-	1794	1803	1.41e-05	0.945	GTTGACAGGT
TFmatrixID_0278		LOC_Os07g08390	-	1920	1929	1.41e-05	0.945	GTTGACAGGT
TFmatrixID_0278		LOC_Os08g01410	+	1952	1961	1.41e-05	0.945	GTTGACAGGT
TFmatrixID_0278		LOC_Os05g05590	-	47	56	1.58e-05	0.945	TTTGACAGGT
TFmatrixID_0278		LOC_Os04g47530	+	135	144	1.58e-05	0.945	CGTGACGGCT
TFmatrixID_0278		LOC_Os10g25060	+	218	227	1.58e-05	0.945	TTTGACAGGT
TFmatrixID_0278		LOC_Os08g30520	+	359	368	1.58e-05	0.945	CGTGACGGCT
TFmatrixID_0278		LOC_Os03g01980	+	471	480	1.58e-05	0.945	TTTGACAGGT
TFmatrixID_0278		LOC_Os01g50610	+	612	621	1.58e-05	0.945	CGTGACGGCT
TFmatrixID_0278		LOC_Os11g07500	-	1233	1242	1.58e-05	0.945	TTTGACAGGT
TFmatrixID_0278		LOC_Os05g03884	-	1522	1531	1.58e-05	0.945	CGTGACGGCT
TFmatrixID_0278		LOC_Os01g08600	-	1592	1601	1.58e-05	0.945	TTTGACAGGT
TFmatrixID_0278		LOC_Os02g38130	-	1848	1857	1.58e-05	0.945	CGTGACGGCT
TFmatrixID_0278		LOC_Os03g19452	-	1705	1714	1.66e-05	0.945	GTTGACGGCT
TFmatrixID_0278		LOC_Os07g49150	-	1891	1900	1.66e-05	0.945	GTTGACGGCT
TFmatrixID_0278		LOC_Os03g18680	-	1950	1959	1.66e-05	0.945	GTTGACGGCT
TFmatrixID_0278		LOC_Os08g02550	+	234	243	1.75e-05	0.945	GGTGACATCT
TFmatrixID_0278		LOC_Os02g02320	+	370	379	1.75e-05	0.945	GGTGACATCT
TFmatrixID_0278		LOC_Os04g55650	+	825	834	1.75e-05	0.945	GGTGACATCT
TFmatrixID_0278		LOC_Os02g01140	-	1017	1026	1.75e-05	0.945	GGTGACATCT
TFmatrixID_0278		LOC_Os03g09120	-	1138	1147	1.75e-05	0.945	GGTGACATCT
TFmatrixID_0278		LOC_Os05g44300	+	1176	1185	1.75e-05	0.945	GGTGACATCT
TFmatrixID_0278		LOC_Os02g06840	+	1370	1379	1.75e-05	0.945	GGTGACATCT
TFmatrixID_0278		LOC_Os02g07030	+	1501	1510	1.75e-05	0.945	GGTGACATCT
TFmatrixID_0278		LOC_Os02g02890	+	264	273	1.91e-05	0.945	CTTGACAGCT
TFmatrixID_0278		LOC_Os03g13274	-	354	363	1.91e-05	0.945	CTTGACAGCT
TFmatrixID_0278		LOC_Os03g21510	+	620	629	1.91e-05	0.945	CTTGACAGCT
TFmatrixID_0278		LOC_Os04g14690	+	626	635	1.91e-05	0.945	AGTGACGGGT
TFmatrixID_0278		LOC_Os12g42280	-	752	761	1.91e-05	0.945	AGTGACGGGT
TFmatrixID_0278		LOC_Os10g35870	-	1091	1100	1.91e-05	0.945	AGTGACGGGT
TFmatrixID_0278		LOC_Os02g38470	+	1146	1155	1.91e-05	0.945	CTTGACAGCT
TFmatrixID_0278		LOC_Os06g19070	+	1253	1262	1.91e-05	0.945	CTTGACAGCT
TFmatrixID_0278		LOC_Os05g50290	+	1490	1499	1.91e-05	0.945	CTTGACAGCT
TFmatrixID_0278		LOC_Os12g01260	-	1687	1696	1.91e-05	0.945	AGTGACGGGT
TFmatrixID_0278		LOC_Os11g04070	-	1892	1901	1.91e-05	0.945	AGTGACGGGT
TFmatrixID_0278		LOC_Os02g57590	-	1927	1936	1.91e-05	0.945	AGTGACGGGT
TFmatrixID_0278		LOC_Os06g10650	-	1977	1986	1.91e-05	0.945	AGTGACGGGT
TFmatrixID_0278		LOC_Os12g36830	-	3	12	2e-05	0.945	TTTGACGGCT
TFmatrixID_0278		LOC_Os11g08210	-	293	302	2e-05	0.945	TTTGACGGCT
TFmatrixID_0278		LOC_Os03g62040	+	1327	1336	2e-05	0.945	TTTGACGGCT
TFmatrixID_0278		LOC_Os08g31470	+	1	10	2.12e-05	0.945	TGTGACATCT
TFmatrixID_0278		LOC_Os03g55890	+	98	107	2.12e-05	0.945	TGTGACATCT
TFmatrixID_0278		LOC_Os11g32110	-	362	371	2.12e-05	0.945	TGTGACATCT
TFmatrixID_0278		LOC_Os11g24510	-	430	439	2.12e-05	0.945	TGTGACATCT
TFmatrixID_0278		LOC_Os05g46570	+	466	475	2.12e-05	0.945	TGTGACATCT
TFmatrixID_0278		LOC_Os10g02584	+	526	535	2.12e-05	0.945	TGTGACATCT
TFmatrixID_0278		LOC_Os08g35960	+	791	800	2.12e-05	0.945	TGTGACATCT
TFmatrixID_0278		LOC_Os12g34874	+	804	813	2.12e-05	0.945	TGTGACATCT
TFmatrixID_0278		LOC_Os04g32470	-	857	866	2.12e-05	0.945	TGTGACATCT
TFmatrixID_0278		LOC_Os02g10130	+	966	975	2.12e-05	0.945	TGTGACATCT
TFmatrixID_0278		LOC_Os02g02350	-	969	978	2.12e-05	0.945	TGTGACATCT
TFmatrixID_0278		LOC_Os03g06340	+	1286	1295	2.12e-05	0.945	TGTGACATCT
TFmatrixID_0278		LOC_Os09g36700	-	1390	1399	2.12e-05	0.945	TGTGACATCT
TFmatrixID_0278		LOC_Os11g05410	+	1779	1788	2.12e-05	0.945	TGTGACATCT
TFmatrixID_0278		LOC_Os02g37862	+	924	933	2.19e-05	0.945	GCTGACAGCT
TFmatrixID_0278		LOC_Os02g32469	+	1046	1055	2.19e-05	0.945	GCTGACAGCT
TFmatrixID_0278		LOC_Os04g42860	-	1038	1047	2.19e-05	0.945	GCTGACAGCT
TFmatrixID_0278		LOC_Os09g20820	+	62	71	2.3e-05	0.945	ATTGACAGGT
TFmatrixID_0278		LOC_Os10g40660	-	143	152	2.3e-05	0.945	ATTGACAGGT
TFmatrixID_0278		LOC_Os02g42330	-	216	225	2.3e-05	0.945	ATTGACAGGT
TFmatrixID_0278		LOC_Os01g51170	+	401	410	2.3e-05	0.945	ATTGACAGGT
TFmatrixID_0278		LOC_Os04g38270	+	687	696	2.3e-05	0.945	ATTGACAGGT
TFmatrixID_0278		LOC_Os01g09200	-	995	1004	2.3e-05	0.945	ATTGACAGGT
TFmatrixID_0278		LOC_Os01g07560	-	1019	1028	2.3e-05	0.945	ATTGACAGGT
TFmatrixID_0278		LOC_Os04g55410	+	1055	1064	2.3e-05	0.945	ATTGACAGGT
TFmatrixID_0278		LOC_Os01g53680	+	1313	1322	2.3e-05	0.945	ATTGACAGGT
TFmatrixID_0278		LOC_Os01g25760	-	1423	1432	2.3e-05	0.945	ATTGACAGGT
TFmatrixID_0278		LOC_Os10g33170	-	1439	1448	2.3e-05	0.945	ATTGACAGGT
TFmatrixID_0278		LOC_Os05g01500	+	1482	1491	2.3e-05	0.945	ATTGACAGGT
TFmatrixID_0278		LOC_Os01g01060	+	1531	1540	2.3e-05	0.945	ATTGACAGGT
TFmatrixID_0278		LOC_Os01g07360	+	1666	1675	2.3e-05	0.945	ATTGACAGGT
TFmatrixID_0278		LOC_Os04g46580	-	1771	1780	2.3e-05	0.945	ATTGACAGGT
TFmatrixID_0278		LOC_Os03g50290	-	1838	1847	2.3e-05	0.945	ATTGACAGGT
TFmatrixID_0278		LOC_Os07g37210	+	1883	1892	2.3e-05	0.945	ATTGACAGGT
TFmatrixID_0278		LOC_Os09g35600	-	419	428	2.36e-05	0.945	GGTGACAGCC
TFmatrixID_0278		LOC_Os11g01510	+	885	894	2.36e-05	0.945	GGTGACAGCC
TFmatrixID_0278		LOC_Os05g43390	+	1201	1210	2.36e-05	0.945	GGTGACAGCC
TFmatrixID_0278		LOC_Os01g55340	+	1323	1332	2.36e-05	0.945	GGTGACAGCC
TFmatrixID_0278		LOC_Os01g59730	-	1688	1697	2.36e-05	0.945	GGTGACAGCC
TFmatrixID_0278		LOC_Os06g17290	+	1883	1892	2.36e-05	0.945	GGTGACAGCC
TFmatrixID_0278		LOC_Os02g24354	-	1898	1907	2.36e-05	0.945	GGTGACAGCC
TFmatrixID_0278		LOC_Os08g03020	+	83	92	2.45e-05	0.945	TCTGACAGCT
TFmatrixID_0278		LOC_Os01g47780	+	539	548	2.45e-05	0.945	TCTGACAGCT
TFmatrixID_0278		LOC_Os02g13380	-	658	667	2.45e-05	0.945	TCTGACAGCT
TFmatrixID_0278		LOC_Os01g02080	-	778	787	2.45e-05	0.945	TCTGACAGCT
TFmatrixID_0278		LOC_Os03g57890	+	704	713	2.62e-05	0.945	TGTGACAGCC
TFmatrixID_0278		LOC_Os09g36680	+	1048	1057	2.62e-05	0.945	TGTGACAGCC
TFmatrixID_0278		LOC_Os04g37670	+	1200	1209	2.62e-05	0.945	TGTGACAGCC
TFmatrixID_0278		LOC_Os01g65169	+	1260	1269	2.62e-05	0.945	TGTGACAGCC
TFmatrixID_0278		LOC_Os05g03190	-	1567	1576	2.62e-05	0.945	TGTGACAGCC
TFmatrixID_0278		LOC_Os09g38370	+	33	42	2.68e-05	0.945	CGTGACGGGT
TFmatrixID_0278		LOC_Os01g45570	-	895	904	2.68e-05	0.945	CGTGACGGGT
TFmatrixID_0278		LOC_Os03g54170	+	945	954	2.68e-05	0.945	CGTGACGGGT
TFmatrixID_0278		LOC_Os12g24250	-	193	202	2.86e-05	0.945	AGTGACATCT
TFmatrixID_0278		LOC_Os06g50220	+	553	562	2.86e-05	0.945	GTTGACGGGT
TFmatrixID_0278		LOC_Os01g61320	-	571	580	2.86e-05	0.945	AGTGACATCT
TFmatrixID_0278		LOC_Os07g47180	-	628	637	2.86e-05	0.945	AGTGACATCT
TFmatrixID_0278		LOC_Os03g36080	+	678	687	2.86e-05	0.945	AGTGACATCT
TFmatrixID_0278		LOC_Os02g07044	+	799	808	2.86e-05	0.945	AGTGACATCT
TFmatrixID_0278		LOC_Os01g70170	+	1008	1017	2.86e-05	0.945	AGTGACATCT
TFmatrixID_0278		LOC_Os11g10480	+	1091	1100	2.86e-05	0.945	AGTGACATCT
TFmatrixID_0278		LOC_Os01g04710	-	1481	1490	2.86e-05	0.945	AGTGACATCT
TFmatrixID_0278		LOC_Os09g15520	-	1482	1491	2.86e-05	0.945	GTTGACGGGT
TFmatrixID_0278		LOC_Os06g08080	+	1850	1859	2.86e-05	0.945	AGTGACATCT
TFmatrixID_0278		LOC_Os04g35270	+	1850	1859	2.86e-05	0.945	AGTGACATCT
TFmatrixID_0278		LOC_Os04g43050	+	1965	1974	2.86e-05	0.945	GTTGACGGGT
TFmatrixID_0278		LOC_Os03g48080	+	155	164	2.96e-05	0.945	GGTGACATGT
TFmatrixID_0278		LOC_Os03g61240	+	165	174	2.96e-05	0.945	GGTGACATGT
TFmatrixID_0278		LOC_Os02g03040	+	353	362	2.96e-05	0.945	GGTGACATGT
TFmatrixID_0278		LOC_Os10g10244	-	413	422	2.96e-05	0.945	GGTGACATGT
TFmatrixID_0278		LOC_Os11g01340	+	483	492	2.96e-05	0.945	GGTGACATGT
TFmatrixID_0278		LOC_Os04g54940	-	496	505	2.96e-05	0.945	GGTGACATGT
TFmatrixID_0278		LOC_Os07g09710	-	1125	1134	2.96e-05	0.945	GGTGACATGT
TFmatrixID_0278		LOC_Os03g28140	+	1348	1357	2.96e-05	0.945	GGTGACATGT
TFmatrixID_0278		LOC_Os06g04699	+	1364	1373	2.96e-05	0.945	GGTGACATGT
TFmatrixID_0278		LOC_Os06g01620	+	1830	1839	2.96e-05	0.945	GGTGACATGT
TFmatrixID_0278		LOC_Os01g23620	+	1939	1948	2.96e-05	0.945	GGTGACATGT
TFmatrixID_0278		LOC_Os01g01120	+	1965	1974	2.96e-05	0.945	GGTGACATGT
TFmatrixID_0278		LOC_Os03g21160	+	424	433	3.05e-05	0.945	CTTGACAGGT
TFmatrixID_0278		LOC_Os11g25980	-	1215	1224	3.05e-05	0.945	CTTGACAGGT
TFmatrixID_0278		LOC_Os07g39240	-	1448	1457	3.05e-05	0.945	CTTGACAGGT
TFmatrixID_0278		LOC_Os10g22520	-	136	145	3.14e-05	0.945	TTTGACGGGT
TFmatrixID_0278		LOC_Os02g43370	-	868	877	3.14e-05	0.945	TTTGACGGGT
TFmatrixID_0278		LOC_Os02g12794	-	1056	1065	3.14e-05	0.945	TTTGACGGGT
TFmatrixID_0278		LOC_Os08g42530	+	1394	1403	3.14e-05	0.945	TTTGACGGGT
TFmatrixID_0278		LOC_Os12g04220	-	1388	1397	3.14e-05	0.945	TTTGACGGGT
TFmatrixID_0278		LOC_Os03g01110	-	255	264	3.23e-05	0.945	ACTGACAGCT
TFmatrixID_0278		LOC_Os06g51084	-	270	279	3.23e-05	0.945	ACTGACAGCT
TFmatrixID_0278		LOC_Os03g61670	-	844	853	3.23e-05	0.945	ACTGACAGCT
TFmatrixID_0278		LOC_Os06g08720	+	1064	1073	3.23e-05	0.945	ACTGACAGCT
TFmatrixID_0278		LOC_Os03g03660	-	1659	1668	3.23e-05	0.945	ACTGACAGCT
TFmatrixID_0278		LOC_Os05g19370	+	35	44	3.34e-05	0.945	TGTGACATGT
TFmatrixID_0278		LOC_Os06g05830	-	83	92	3.34e-05	0.945	TGTGACATGT
TFmatrixID_0278		LOC_Os08g14330	-	196	205	3.34e-05	0.945	TGTGACATGT
TFmatrixID_0278		LOC_Os02g15550	+	214	223	3.34e-05	0.945	TGTGACATGT
TFmatrixID_0278		LOC_Os10g31820	-	271	280	3.34e-05	0.945	TGTGACATGT
TFmatrixID_0278		LOC_Os05g01470	+	542	551	3.34e-05	0.945	TGTGACATGT
TFmatrixID_0278		LOC_Os11g37070	+	549	558	3.34e-05	0.945	TGTGACATGT
TFmatrixID_0278		LOC_Os03g08930	+	641	650	3.34e-05	0.945	TGTGACATGT
TFmatrixID_0278		LOC_Os11g24180	-	673	682	3.34e-05	0.945	TGTGACATGT
TFmatrixID_0278		LOC_Os11g37080	+	905	914	3.34e-05	0.945	TGTGACATGT
TFmatrixID_0278		LOC_Os05g03310	-	985	994	3.34e-05	0.945	TGTGACATGT
TFmatrixID_0278		LOC_Os01g39890	+	1407	1416	3.34e-05	0.945	TGTGACATGT
TFmatrixID_0278		LOC_Os09g10910	-	1581	1590	3.34e-05	0.945	TGTGACATGT
TFmatrixID_0278		LOC_Os10g17454	-	1601	1610	3.34e-05	0.945	TGTGACATGT
TFmatrixID_0278		LOC_Os01g70180	+	1643	1652	3.34e-05	0.945	TGTGACATGT
TFmatrixID_0278		LOC_Os12g38200	-	1703	1712	3.34e-05	0.945	TGTGACATGT
TFmatrixID_0278		LOC_Os05g45300	+	1763	1772	3.34e-05	0.945	TGTGACATGT
TFmatrixID_0278		LOC_Os03g11550	-	1763	1772	3.34e-05	0.945	TGTGACATGT
TFmatrixID_0278		LOC_Os10g38940	+	1789	1798	3.34e-05	0.945	TGTGACATGT
TFmatrixID_0278		LOC_Os05g02520	+	1836	1845	3.34e-05	0.945	TGTGACATGT
TFmatrixID_0278		LOC_Os02g47940	+	1847	1856	3.34e-05	0.945	TGTGACATGT
TFmatrixID_0278		LOC_Os02g54160	-	68	77	3.41e-05	0.945	GCTGACAGGT
TFmatrixID_0278		LOC_Os12g28770	+	139	148	3.41e-05	0.945	GCTGACAGGT
TFmatrixID_0278		LOC_Os06g08440	-	318	327	3.41e-05	0.945	GCTGACAGGT
TFmatrixID_0278		LOC_Os03g14690	-	471	480	3.41e-05	0.945	GCTGACAGGT
TFmatrixID_0278		LOC_Os02g18410	+	1071	1080	3.41e-05	0.945	GCTGACAGGT
TFmatrixID_0278		LOC_Os12g06200	+	1210	1219	3.41e-05	0.945	GCTGACAGGT
TFmatrixID_0278		LOC_Os08g09570	+	1620	1629	3.41e-05	0.945	GCTGACAGGT
TFmatrixID_0278		LOC_Os10g30280	-	1654	1663	3.41e-05	0.945	GCTGACAGGT
TFmatrixID_0278		LOC_Os08g16610	-	1873	1882	3.41e-05	0.945	GCTGACAGGT
TFmatrixID_0278		LOC_Os02g11830	-	1891	1900	3.41e-05	0.945	GCTGACAGGT
TFmatrixID_0278		LOC_Os08g39350	+	1935	1944	3.41e-05	0.945	GCTGACAGGT
TFmatrixID_0278		LOC_Os08g23730	-	1960	1969	3.41e-05	0.945	GCTGACAGGT
TFmatrixID_0278		LOC_Os05g20304	+	220	229	3.56e-05	0.945	AGTGACAGCC
TFmatrixID_0278		LOC_Os06g06250	+	811	820	3.56e-05	0.945	GGTGACGTCT
TFmatrixID_0278		LOC_Os05g46510	-	1186	1195	3.56e-05	0.945	GGTGACGTCT
TFmatrixID_0278		LOC_Os01g44110	-	1209	1218	3.56e-05	0.945	AGTGACAGCC
TFmatrixID_0278		LOC_Os10g35580	-	234	243	3.64e-05	0.945	CTTGACGGCT
TFmatrixID_0278		LOC_Os01g27520	+	1012	1021	3.64e-05	0.945	CTTGACGGCT
TFmatrixID_0278		LOC_Os12g05090	+	239	248	3.79e-05	0.945	GATGACAGCT
TFmatrixID_0278		LOC_Os01g57560	+	1093	1102	3.79e-05	0.945	GGTGACAGGC
TFmatrixID_0278		LOC_Os03g03180	-	1340	1349	3.79e-05	0.945	GGTGACAGGC
TFmatrixID_0278		LOC_Os11g34790	-	1470	1479	3.79e-05	0.945	GGTGACAGGC
TFmatrixID_0278		LOC_Os05g30240	-	1481	1490	3.79e-05	0.945	GGTGACAGGC
TFmatrixID_0278		LOC_Os08g02120	-	1705	1714	3.79e-05	0.945	GGTGACAGGC
TFmatrixID_0278		LOC_Os01g11240	+	69	78	3.97e-05	0.945	CGTGACATCT
TFmatrixID_0278		LOC_Os02g49610	-	71	80	3.97e-05	0.945	TCTGACAGGT
TFmatrixID_0278		LOC_Os10g29470	-	746	755	3.97e-05	0.945	CGTGACATCT
TFmatrixID_0278		LOC_Os11g38200	+	758	767	3.97e-05	0.945	TCTGACAGGT
TFmatrixID_0278		LOC_Os02g44690	+	998	1007	3.97e-05	0.945	TCTGACAGGT
TFmatrixID_0278		LOC_Os04g49250	-	1039	1048	3.97e-05	0.945	TCTGACAGGT
TFmatrixID_0278		LOC_Os10g05950	+	1274	1283	3.97e-05	0.945	TCTGACAGGT
TFmatrixID_0278		LOC_Os07g44190	-	1412	1421	3.97e-05	0.945	TCTGACAGGT
TFmatrixID_0278		LOC_Os05g36990	-	1952	1961	3.97e-05	0.945	TCTGACAGGT
TFmatrixID_0278		LOC_Os09g20650	-	1991	2000	3.97e-05	0.945	TCTGACAGGT
TFmatrixID_0278		LOC_Os02g58070	+	322	331	4.06e-05	0.945	TGTGACGTCT
TFmatrixID_0278		LOC_Os08g13350	+	388	397	4.06e-05	0.945	TGTGACGTCT
TFmatrixID_0278		LOC_Os04g20474	-	409	418	4.06e-05	0.945	TGTGACGTCT
TFmatrixID_0278		LOC_Os04g58280	-	365	374	4.23e-05	0.945	GTTGACATCT
TFmatrixID_0278		LOC_Os06g12740	+	927	936	4.23e-05	0.945	GTTGACATCT
TFmatrixID_0278		LOC_Os03g55280	-	1032	1041	4.23e-05	0.945	GCTGACGGCT
TFmatrixID_0278		LOC_Os01g57890	-	1125	1134	4.23e-05	0.945	GTTGACATCT
TFmatrixID_0278		LOC_Os11g03590	-	1226	1235	4.23e-05	0.945	GCTGACGGCT
TFmatrixID_0278		LOC_Os05g23600	-	1384	1393	4.23e-05	0.945	GCTGACGGCT
TFmatrixID_0278		LOC_Os03g13130	+	1604	1613	4.23e-05	0.945	GTTGACATCT
TFmatrixID_0278		LOC_Os05g07650	+	1816	1825	4.23e-05	0.945	GTTGACATCT
TFmatrixID_0278		LOC_Os08g01780	+	1827	1836	4.23e-05	0.945	GTTGACATCT
TFmatrixID_0278		LOC_Os12g38490	+	1894	1903	4.23e-05	0.945	GCTGACGGCT
TFmatrixID_0278		LOC_Os07g04240	+	55	64	4.51e-05	0.945	ATTGACGGGT
TFmatrixID_0278		LOC_Os10g24690	-	387	396	4.51e-05	0.945	TGTGACAGGC

## Sheet: DOWN
Motif ID	Alt ID	Sequence Name	Strand	Start	End	p-value	q-value	Matched Sequence
TFmatrixID_0278		LOC_Os05g06490	+	21	30	7.46e-07	0.644	GGTGACAGCT
TFmatrixID_0278		LOC_Os01g35050	-	45	54	7.46e-07	0.644	GGTGACAGCT
TFmatrixID_0278		LOC_Os01g54480	+	73	82	7.46e-07	0.644	GGTGACAGCT
TFmatrixID_0278		LOC_Os03g06120	+	146	155	7.46e-07	0.644	GGTGACAGCT
TFmatrixID_0278		LOC_Os03g04270	+	313	322	7.46e-07	0.644	GGTGACAGCT
TFmatrixID_0278		LOC_Os05g51140	+	590	599	7.46e-07	0.644	GGTGACAGCT
TFmatrixID_0278		LOC_Os01g73900	+	732	741	7.46e-07	0.644	GGTGACAGCT
TFmatrixID_0278		LOC_Os03g53050	+	817	826	7.46e-07	0.644	GGTGACAGCT
TFmatrixID_0278		LOC_Os03g60560	-	853	862	7.46e-07	0.644	GGTGACAGCT
TFmatrixID_0278		LOC_Os05g51130	+	924	933	7.46e-07	0.644	GGTGACAGCT
TFmatrixID_0278		LOC_Os01g10610	+	1102	1111	7.46e-07	0.644	GGTGACAGCT
TFmatrixID_0278		LOC_Os04g48260	-	1113	1122	7.46e-07	0.644	GGTGACAGCT
TFmatrixID_0278		LOC_Os03g18770	+	1565	1574	7.46e-07	0.644	GGTGACAGCT
TFmatrixID_0278		LOC_Os04g20270	-	1853	1862	7.46e-07	0.644	GGTGACAGCT
TFmatrixID_0278		LOC_Os07g46560	-	108	117	1.65e-06	0.799	TGTGACAGCT
TFmatrixID_0278		LOC_Os03g55450	+	178	187	1.65e-06	0.799	TGTGACAGCT
TFmatrixID_0278		LOC_Os06g30060	+	182	191	1.65e-06	0.799	TGTGACAGCT
TFmatrixID_0278		LOC_Os03g09170	-	233	242	1.65e-06	0.799	TGTGACAGCT
TFmatrixID_0278		LOC_Os03g38730	+	304	313	1.65e-06	0.799	TGTGACAGCT
TFmatrixID_0278		LOC_Os07g25410	+	693	702	1.65e-06	0.799	TGTGACAGCT
TFmatrixID_0278		LOC_Os02g51610	-	723	732	1.65e-06	0.799	TGTGACAGCT
TFmatrixID_0278		LOC_Os08g15050	+	809	818	1.65e-06	0.799	TGTGACAGCT
TFmatrixID_0278		LOC_Os04g46390	+	1382	1391	1.65e-06	0.799	TGTGACAGCT
TFmatrixID_0278		LOC_Os10g36950	+	1400	1409	1.65e-06	0.799	TGTGACAGCT
TFmatrixID_0278		LOC_Os11g21990	-	1849	1858	1.65e-06	0.799	TGTGACAGCT
TFmatrixID_0278		LOC_Os06g01440	+	171	180	2.56e-06	0.821	AGTGACAGCT
TFmatrixID_0278		LOC_Os02g31220	+	559	568	2.56e-06	0.821	AGTGACAGCT
TFmatrixID_0278		LOC_Os04g12970	+	1001	1010	2.56e-06	0.821	AGTGACAGCT
TFmatrixID_0278		LOC_Os01g70550	+	50	59	3.31e-06	0.821	GGTGACAGGT
TFmatrixID_0278		LOC_Os01g74310	-	147	156	3.31e-06	0.821	GGTGACAGGT
TFmatrixID_0278		LOC_Os01g57240	+	523	532	3.31e-06	0.821	GGTGACAGGT
TFmatrixID_0278		LOC_Os02g14980	+	572	581	3.31e-06	0.821	GGTGACAGGT
TFmatrixID_0278		LOC_Os03g14150	+	593	602	3.31e-06	0.821	GGTGACAGGT
TFmatrixID_0278		LOC_Os04g45940	+	857	866	3.31e-06	0.821	GGTGACAGGT
TFmatrixID_0278		LOC_Os11g11490	+	914	923	3.31e-06	0.821	GGTGACAGGT
TFmatrixID_0278		LOC_Os02g52040	+	1516	1525	3.31e-06	0.821	GGTGACAGGT
TFmatrixID_0278		LOC_Os08g19420	+	1545	1554	3.31e-06	0.821	GGTGACAGGT
TFmatrixID_0278		LOC_Os03g14370	+	1716	1725	3.31e-06	0.821	GGTGACAGGT
TFmatrixID_0278		LOC_Os07g39980	-	1805	1814	3.31e-06	0.821	GGTGACAGGT
TFmatrixID_0278		LOC_Os03g39930	-	1833	1842	3.31e-06	0.821	GGTGACAGGT
TFmatrixID_0278		LOC_Os01g60600	+	1861	1870	3.31e-06	0.821	GGTGACAGGT
TFmatrixID_0278		LOC_Os08g36480	+	114	123	4.22e-06	0.821	TGTGACAGGT
TFmatrixID_0278		LOC_Os10g39130	-	172	181	4.22e-06	0.821	TGTGACAGGT
TFmatrixID_0278		LOC_Os01g48830	+	310	319	4.22e-06	0.821	TGTGACAGGT
TFmatrixID_0278		LOC_Os08g17160	-	446	455	4.22e-06	0.821	TGTGACAGGT
TFmatrixID_0278		LOC_Os01g60860	-	453	462	4.22e-06	0.821	TGTGACAGGT
TFmatrixID_0278		LOC_Os03g58480	+	496	505	4.22e-06	0.821	TGTGACAGGT
TFmatrixID_0278		LOC_Os02g48330	-	610	619	4.22e-06	0.821	TGTGACAGGT
TFmatrixID_0278		LOC_Os07g25450	-	808	817	4.22e-06	0.821	TGTGACAGGT
TFmatrixID_0278		LOC_Os01g56300	-	838	847	4.22e-06	0.821	TGTGACAGGT
TFmatrixID_0278		LOC_Os05g47770	+	1021	1030	4.22e-06	0.821	TGTGACAGGT
TFmatrixID_0278		LOC_Os03g24040	+	1031	1040	4.22e-06	0.821	TGTGACAGGT
TFmatrixID_0278		LOC_Os02g02290	-	1119	1128	4.22e-06	0.821	TGTGACAGGT
TFmatrixID_0278		LOC_Os03g21540	-	1486	1495	4.22e-06	0.821	TGTGACAGGT
TFmatrixID_0278		LOC_Os01g09220	-	1641	1650	4.22e-06	0.821	TGTGACAGGT
TFmatrixID_0278		LOC_Os11g44430	+	1786	1795	4.22e-06	0.821	TGTGACAGGT
TFmatrixID_0278		LOC_Os05g35520	-	1920	1929	4.22e-06	0.821	TGTGACAGGT
TFmatrixID_0278		LOC_Os05g31620	+	318	327	4.83e-06	0.821	GGTGACGGCT
TFmatrixID_0278		LOC_Os02g39630	-	750	759	4.83e-06	0.821	GGTGACGGCT
TFmatrixID_0278		LOC_Os02g29210	+	928	937	4.83e-06	0.821	GGTGACGGCT
TFmatrixID_0278		LOC_Os02g33230	+	1038	1047	4.83e-06	0.821	GGTGACGGCT
TFmatrixID_0278		LOC_Os07g04370	-	1034	1043	4.83e-06	0.821	GGTGACGGCT
TFmatrixID_0278		LOC_Os07g14850	+	1262	1271	4.83e-06	0.821	GGTGACGGCT
TFmatrixID_0278		LOC_Os04g57220	-	1270	1279	4.83e-06	0.821	GGTGACGGCT
TFmatrixID_0278		LOC_Os01g52570	+	1887	1896	4.83e-06	0.821	GGTGACGGCT
TFmatrixID_0278		LOC_Os04g59190	-	1972	1981	4.83e-06	0.821	GGTGACGGCT
TFmatrixID_0278		LOC_Os03g18070	-	159	168	5.58e-06	0.821	CGTGACAGCT
TFmatrixID_0278		LOC_Os01g50940	+	1236	1245	5.58e-06	0.821	CGTGACAGCT
TFmatrixID_0278		LOC_Os04g11524	+	1335	1344	5.58e-06	0.821	CGTGACAGCT
TFmatrixID_0278		LOC_Os10g36950	-	1406	1415	5.58e-06	0.821	CGTGACAGCT
TFmatrixID_0278		LOC_Os01g32964	-	1541	1550	5.58e-06	0.821	CGTGACAGCT
TFmatrixID_0278		LOC_Os12g37890	-	1574	1583	5.58e-06	0.821	CGTGACAGCT
TFmatrixID_0278		LOC_Os05g50910	-	1845	1854	5.58e-06	0.821	CGTGACAGCT
TFmatrixID_0278		LOC_Os03g55290	-	1946	1955	5.58e-06	0.821	CGTGACAGCT
TFmatrixID_0278		LOC_Os01g65200	+	585	594	6.32e-06	0.821	TGTGACGGCT
TFmatrixID_0278		LOC_Os03g62430	+	1487	1496	6.32e-06	0.821	TGTGACGGCT
TFmatrixID_0278		LOC_Os02g42990	-	1796	1805	6.32e-06	0.821	TGTGACGGCT
TFmatrixID_0278		LOC_Os01g52710	-	1799	1808	6.32e-06	0.821	TGTGACGGCT
TFmatrixID_0278		LOC_Os01g68160	+	23	32	7.23e-06	0.821	GTTGACAGCT
TFmatrixID_0278		LOC_Os11g36030	+	602	611	7.23e-06	0.821	GTTGACAGCT
TFmatrixID_0278		LOC_Os01g38620	+	686	695	7.23e-06	0.821	GTTGACAGCT
TFmatrixID_0278		LOC_Os09g20000	+	1153	1162	7.23e-06	0.821	GTTGACAGCT
TFmatrixID_0278		LOC_Os11g06390	-	1166	1175	7.23e-06	0.821	GTTGACAGCT
TFmatrixID_0278		LOC_Os10g27340	+	51	60	8.14e-06	0.821	AGTGACAGGT
TFmatrixID_0278		LOC_Os08g40820	-	52	61	8.14e-06	0.821	AGTGACAGGT
TFmatrixID_0278		LOC_Os06g09350	-	119	128	8.14e-06	0.821	AGTGACAGGT
TFmatrixID_0278		LOC_Os04g35700	+	164	173	8.14e-06	0.821	AGTGACAGGT
TFmatrixID_0278		LOC_Os02g31867	+	259	268	8.14e-06	0.821	AGTGACAGGT
TFmatrixID_0278		LOC_Os03g01890	+	670	679	8.14e-06	0.821	AGTGACAGGT
TFmatrixID_0278		LOC_Os04g52450	+	800	809	8.14e-06	0.821	AGTGACAGGT
TFmatrixID_0278		LOC_Os04g56730	+	901	910	8.14e-06	0.821	AGTGACAGGT
TFmatrixID_0278		LOC_Os01g05540	+	1522	1531	8.14e-06	0.821	AGTGACAGGT
TFmatrixID_0278		LOC_Os12g42860	-	1548	1557	8.14e-06	0.821	AGTGACAGGT
TFmatrixID_0278		LOC_Os03g02320	-	171	180	9.25e-06	0.821	TTTGACAGCT
TFmatrixID_0278		LOC_Os03g49170	+	249	258	9.25e-06	0.821	TTTGACAGCT
TFmatrixID_0278		LOC_Os02g49150	-	479	488	9.25e-06	0.821	TTTGACAGCT
TFmatrixID_0278		LOC_Os12g26030	+	599	608	9.25e-06	0.821	TTTGACAGCT
TFmatrixID_0278		LOC_Os01g17390	+	967	976	9.25e-06	0.821	TTTGACAGCT
TFmatrixID_0278		LOC_Os01g36950	-	997	1006	9.25e-06	0.821	TTTGACAGCT
TFmatrixID_0278		LOC_Os03g08520	-	1159	1168	9.25e-06	0.821	TTTGACAGCT
TFmatrixID_0278		LOC_Os05g01350	+	1380	1389	9.25e-06	0.821	TTTGACAGCT
TFmatrixID_0278		LOC_Os04g58880	+	1540	1549	9.25e-06	0.821	TTTGACAGCT
TFmatrixID_0278		LOC_Os04g48270	-	1556	1565	9.25e-06	0.821	TTTGACAGCT
TFmatrixID_0278		LOC_Os03g11910	-	1601	1610	9.25e-06	0.821	TTTGACAGCT
TFmatrixID_0278		LOC_Os03g22890	+	1679	1688	9.25e-06	0.821	TTTGACAGCT
TFmatrixID_0278		LOC_Os04g55490	+	1843	1852	9.25e-06	0.821	TTTGACAGCT
TFmatrixID_0278		LOC_Os06g07600	+	1854	1863	9.25e-06	0.821	TTTGACAGCT
TFmatrixID_0278		LOC_Os07g37030	+	61	70	9.99e-06	0.821	AGTGACGGCT
TFmatrixID_0278		LOC_Os01g08750	+	548	557	9.99e-06	0.821	AGTGACGGCT
TFmatrixID_0278		LOC_Os01g19970	-	1984	1993	9.99e-06	0.821	AGTGACGGCT
TFmatrixID_0278		LOC_Os01g70190	+	52	61	1.06e-05	0.821	GGTGACGGGT
TFmatrixID_0278		LOC_Os03g55540	+	153	162	1.06e-05	0.821	GGTGACGGGT
TFmatrixID_0278		LOC_Os04g31900	-	182	191	1.06e-05	0.821	GGTGACGGGT
TFmatrixID_0278		LOC_Os06g43870	+	431	440	1.06e-05	0.821	GGTGACGGGT
TFmatrixID_0278		LOC_Os01g52640	-	1186	1195	1.06e-05	0.821	GGTGACGGGT
TFmatrixID_0278		LOC_Os01g32080	-	1537	1546	1.06e-05	0.821	GGTGACGGGT
TFmatrixID_0278		LOC_Os03g52680	-	1551	1560	1.06e-05	0.821	GGTGACGGGT
TFmatrixID_0278		LOC_Os02g06580	+	1599	1608	1.06e-05	0.821	GGTGACGGGT
TFmatrixID_0278		LOC_Os05g38980	-	1727	1736	1.06e-05	0.821	GGTGACGGGT
TFmatrixID_0278		LOC_Os07g07040	-	61	70	1.17e-05	0.821	ATTGACAGCT
TFmatrixID_0278		LOC_Os05g05710	+	295	304	1.17e-05	0.821	ATTGACAGCT
TFmatrixID_0278		LOC_Os06g38294	+	495	504	1.17e-05	0.821	ATTGACAGCT
TFmatrixID_0278		LOC_Os11g41990	+	833	842	1.17e-05	0.821	ATTGACAGCT
TFmatrixID_0278		LOC_Os05g51790	-	863	872	1.17e-05	0.821	ATTGACAGCT
TFmatrixID_0278		LOC_Os02g30850	+	924	933	1.17e-05	0.821	ATTGACAGCT
TFmatrixID_0278		LOC_Os04g46750	-	1108	1117	1.17e-05	0.821	ATTGACAGCT
TFmatrixID_0278		LOC_Os05g43950	+	1161	1170	1.17e-05	0.821	ATTGACAGCT
TFmatrixID_0278		LOC_Os05g44900	+	1746	1755	1.17e-05	0.821	ATTGACAGCT
TFmatrixID_0278		LOC_Os04g57600	+	1817	1826	1.17e-05	0.821	ATTGACAGCT
TFmatrixID_0278		LOC_Os07g38120	+	1879	1888	1.17e-05	0.821	ATTGACAGCT
TFmatrixID_0278		LOC_Os02g51350	-	174	183	1.25e-05	0.821	CGTGACAGGT
TFmatrixID_0278		LOC_Os03g55430	-	523	532	1.25e-05	0.821	CGTGACAGGT
TFmatrixID_0278		LOC_Os06g40840	-	666	675	1.25e-05	0.821	CGTGACAGGT
TFmatrixID_0278		LOC_Os03g14170	+	894	903	1.25e-05	0.821	CGTGACAGGT
TFmatrixID_0278		LOC_Os07g41720	-	1158	1167	1.25e-05	0.821	CGTGACAGGT
TFmatrixID_0278		LOC_Os06g51220	-	1630	1639	1.25e-05	0.821	CGTGACAGGT
TFmatrixID_0278		LOC_Os02g57630	+	345	354	1.32e-05	0.821	TGTGACGGGT
TFmatrixID_0278		LOC_Os02g32970	-	375	384	1.32e-05	0.821	TGTGACGGGT
TFmatrixID_0278		LOC_Os11g37970	+	442	451	1.32e-05	0.821	TGTGACGGGT
TFmatrixID_0278		LOC_Os02g41954	-	917	926	1.32e-05	0.821	TGTGACGGGT
TFmatrixID_0278		LOC_Os10g43060	-	1270	1279	1.32e-05	0.821	TGTGACGGGT
TFmatrixID_0278		LOC_Os02g13140	-	61	70	1.41e-05	0.821	GTTGACAGGT
TFmatrixID_0278		LOC_Os01g57730	-	185	194	1.41e-05	0.821	GTTGACAGGT
TFmatrixID_0278		LOC_Os07g05570	+	248	257	1.41e-05	0.821	GTTGACAGGT
TFmatrixID_0278		LOC_Os03g49640	-	439	448	1.41e-05	0.821	GTTGACAGGT
TFmatrixID_0278		LOC_Os04g56730	+	497	506	1.41e-05	0.821	GTTGACAGGT
TFmatrixID_0278		LOC_Os11g14040	+	506	515	1.41e-05	0.821	GTTGACAGGT
TFmatrixID_0278		LOC_Os02g32580	+	617	626	1.41e-05	0.821	GTTGACAGGT
TFmatrixID_0278		LOC_Os01g24750	-	992	1001	1.41e-05	0.821	GTTGACAGGT
TFmatrixID_0278		LOC_Os03g02750	-	1052	1061	1.41e-05	0.821	GTTGACAGGT
TFmatrixID_0278		LOC_Os04g58890	+	1434	1443	1.41e-05	0.821	GTTGACAGGT
TFmatrixID_0278		LOC_Os01g61190	-	1946	1955	1.41e-05	0.821	GTTGACAGGT
TFmatrixID_0278		LOC_Os07g38110	-	53	62	1.58e-05	0.821	TTTGACAGGT
TFmatrixID_0278		LOC_Os02g50960	-	150	159	1.58e-05	0.821	CGTGACGGCT
TFmatrixID_0278		LOC_Os07g13530	-	203	212	1.58e-05	0.821	TTTGACAGGT
TFmatrixID_0278		LOC_Os01g54700	+	228	237	1.58e-05	0.821	TTTGACAGGT
TFmatrixID_0278		LOC_Os01g51040	+	264	273	1.58e-05	0.821	TTTGACAGGT
TFmatrixID_0278		LOC_Os01g14050	-	362	371	1.58e-05	0.821	TTTGACAGGT
TFmatrixID_0278		LOC_Os03g06120	-	372	381	1.58e-05	0.821	TTTGACAGGT
TFmatrixID_0278		LOC_Os01g51640	-	446	455	1.58e-05	0.821	TTTGACAGGT
TFmatrixID_0278		LOC_Os11g06760	+	480	489	1.58e-05	0.821	TTTGACAGGT
TFmatrixID_0278		LOC_Os01g40200	+	523	532	1.58e-05	0.821	TTTGACAGGT
TFmatrixID_0278		LOC_Os07g48820	-	578	587	1.58e-05	0.821	TTTGACAGGT
TFmatrixID_0278		LOC_Os06g01260	-	618	627	1.58e-05	0.821	TTTGACAGGT
TFmatrixID_0278		LOC_Os02g56200	-	686	695	1.58e-05	0.821	TTTGACAGGT
TFmatrixID_0278		LOC_Os07g46790	-	799	808	1.58e-05	0.821	TTTGACAGGT
TFmatrixID_0278		LOC_Os07g14100	-	825	834	1.58e-05	0.821	CGTGACGGCT
TFmatrixID_0278		LOC_Os03g04270	+	834	843	1.58e-05	0.821	CGTGACGGCT
TFmatrixID_0278		LOC_Os06g04830	-	859	868	1.58e-05	0.821	TTTGACAGGT
TFmatrixID_0278		LOC_Os01g57740	-	997	1006	1.58e-05	0.821	CGTGACGGCT
TFmatrixID_0278		LOC_Os11g32260	-	1014	1023	1.58e-05	0.821	TTTGACAGGT
TFmatrixID_0278		LOC_Os06g39270	-	1027	1036	1.58e-05	0.821	TTTGACAGGT
TFmatrixID_0278		LOC_Os01g59690	-	1027	1036	1.58e-05	0.821	CGTGACGGCT
TFmatrixID_0278		LOC_Os05g25320	-	1086	1095	1.58e-05	0.821	TTTGACAGGT
TFmatrixID_0278		LOC_Os07g38890	-	1242	1251	1.58e-05	0.821	CGTGACGGCT
TFmatrixID_0278		LOC_Os08g03390	+	1272	1281	1.58e-05	0.821	TTTGACAGGT
TFmatrixID_0278		LOC_Os07g24000	-	1473	1482	1.58e-05	0.821	CGTGACGGCT
TFmatrixID_0278		LOC_Os01g61900	-	1474	1483	1.58e-05	0.821	TTTGACAGGT
TFmatrixID_0278		LOC_Os12g19030	-	1610	1619	1.58e-05	0.821	TTTGACAGGT
TFmatrixID_0278		LOC_Os02g51570	-	1669	1678	1.58e-05	0.821	CGTGACGGCT
TFmatrixID_0278		LOC_Os03g60220	+	1715	1724	1.58e-05	0.821	CGTGACGGCT
TFmatrixID_0278		LOC_Os08g40820	-	1860	1869	1.58e-05	0.821	TTTGACAGGT
TFmatrixID_0278		LOC_Os04g57870	+	1899	1908	1.58e-05	0.821	TTTGACAGGT
TFmatrixID_0278		LOC_Os04g41960	+	220	229	1.66e-05	0.821	GTTGACGGCT
TFmatrixID_0278		LOC_Os05g29880	-	572	581	1.66e-05	0.821	GTTGACGGCT
TFmatrixID_0278		LOC_Os02g54130	+	1349	1358	1.66e-05	0.821	GTTGACGGCT
TFmatrixID_0278		LOC_Os02g46690	+	401	410	1.75e-05	0.821	GGTGACATCT
TFmatrixID_0278		LOC_Os01g65520	-	394	403	1.75e-05	0.821	GGTGACATCT
TFmatrixID_0278		LOC_Os10g30750	+	582	591	1.75e-05	0.821	GGTGACATCT
TFmatrixID_0278		LOC_Os02g57510	-	657	666	1.75e-05	0.821	GGTGACATCT
TFmatrixID_0278		LOC_Os02g03580	+	862	871	1.75e-05	0.821	GGTGACATCT
TFmatrixID_0278		LOC_Os08g40030	-	935	944	1.75e-05	0.821	GGTGACATCT
TFmatrixID_0278		LOC_Os06g13760	-	1284	1293	1.75e-05	0.821	GGTGACATCT
TFmatrixID_0278		LOC_Os09g29750	-	1803	1812	1.75e-05	0.821	GGTGACATCT
TFmatrixID_0278		LOC_Os01g33050	+	1931	1940	1.75e-05	0.821	GGTGACATCT
TFmatrixID_0278		LOC_Os06g09900	+	43	52	1.91e-05	0.821	CTTGACAGCT
TFmatrixID_0278		LOC_Os12g41390	+	309	318	1.91e-05	0.821	CTTGACAGCT
TFmatrixID_0278		LOC_Os03g14370	+	402	411	1.91e-05	0.821	CTTGACAGCT
TFmatrixID_0278		LOC_Os02g38480	+	540	549	1.91e-05	0.821	CTTGACAGCT
TFmatrixID_0278		LOC_Os06g01700	+	811	820	1.91e-05	0.821	CTTGACAGCT
TFmatrixID_0278		LOC_Os02g41550	-	990	999	1.91e-05	0.821	CTTGACAGCT
TFmatrixID_0278		LOC_Os05g48590	+	1140	1149	1.91e-05	0.821	CTTGACAGCT
TFmatrixID_0278		LOC_Os10g36270	+	1158	1167	1.91e-05	0.821	AGTGACGGGT
TFmatrixID_0278		LOC_Os02g08500	+	1159	1168	1.91e-05	0.821	CTTGACAGCT
TFmatrixID_0278		LOC_Os01g27740	-	1167	1176	1.91e-05	0.821	CTTGACAGCT
TFmatrixID_0278		LOC_Os05g39380	-	1252	1261	1.91e-05	0.821	CTTGACAGCT
TFmatrixID_0278		LOC_Os03g62430	-	1414	1423	1.91e-05	0.821	AGTGACGGGT
TFmatrixID_0278		LOC_Os03g15740	-	1465	1474	1.91e-05	0.821	CTTGACAGCT
TFmatrixID_0278		LOC_Os03g21640	-	1536	1545	1.91e-05	0.821	CTTGACAGCT
TFmatrixID_0278		LOC_Os09g28300	+	1599	1608	1.91e-05	0.821	AGTGACGGGT
TFmatrixID_0278		LOC_Os06g36940	-	1691	1700	1.91e-05	0.821	AGTGACGGGT
TFmatrixID_0278		LOC_Os01g04020	-	1778	1787	1.91e-05	0.821	AGTGACGGGT
TFmatrixID_0278		LOC_Os02g31290	-	1824	1833	1.91e-05	0.821	AGTGACGGGT
TFmatrixID_0278		LOC_Os02g41470	-	1837	1846	1.91e-05	0.821	AGTGACGGGT
TFmatrixID_0278		LOC_Os08g41250	-	1886	1895	1.91e-05	0.821	CTTGACAGCT
TFmatrixID_0278		LOC_Os03g52980	-	1932	1941	1.91e-05	0.821	AGTGACGGGT
TFmatrixID_0278		LOC_Os04g38530	+	21	30	2e-05	0.821	TTTGACGGCT
TFmatrixID_0278		LOC_Os02g33080	-	550	559	2e-05	0.821	TTTGACGGCT
TFmatrixID_0278		LOC_Os08g37950	+	572	581	2e-05	0.821	TTTGACGGCT
TFmatrixID_0278		LOC_Os03g14080	-	735	744	2e-05	0.821	TTTGACGGCT
TFmatrixID_0278		LOC_Os01g56390	-	925	934	2e-05	0.821	TTTGACGGCT
TFmatrixID_0278		LOC_Os12g43630	-	1007	1016	2e-05	0.821	TTTGACGGCT
TFmatrixID_0278		LOC_Os03g55590	-	1606	1615	2e-05	0.821	TTTGACGGCT
TFmatrixID_0278		LOC_Os04g43560	-	144	153	2.12e-05	0.821	TGTGACATCT
TFmatrixID_0278		LOC_Os03g15570	+	296	305	2.12e-05	0.821	TGTGACATCT
TFmatrixID_0278		LOC_Os01g13370	-	327	336	2.12e-05	0.821	TGTGACATCT
TFmatrixID_0278		LOC_Os08g25090	-	580	589	2.12e-05	0.821	TGTGACATCT
TFmatrixID_0278		LOC_Os07g34598	+	611	620	2.12e-05	0.821	TGTGACATCT
TFmatrixID_0278		LOC_Os04g32690	+	613	622	2.12e-05	0.821	TGTGACATCT
TFmatrixID_0278		LOC_Os08g25050	-	643	652	2.12e-05	0.821	TGTGACATCT
TFmatrixID_0278		LOC_Os03g08080	-	733	742	2.12e-05	0.821	TGTGACATCT
TFmatrixID_0278		LOC_Os02g54890	+	1024	1033	2.12e-05	0.821	TGTGACATCT
TFmatrixID_0278		LOC_Os07g33730	-	1463	1472	2.12e-05	0.821	TGTGACATCT
TFmatrixID_0278		LOC_Os03g62580	-	1538	1547	2.12e-05	0.821	TGTGACATCT
TFmatrixID_0278		LOC_Os04g52600	+	1570	1579	2.12e-05	0.821	TGTGACATCT
TFmatrixID_0278		LOC_Os03g04070	+	1600	1609	2.12e-05	0.821	TGTGACATCT
TFmatrixID_0278		LOC_Os03g16110	-	1605	1614	2.12e-05	0.821	TGTGACATCT
TFmatrixID_0278		LOC_Os04g01590	-	1871	1880	2.12e-05	0.821	TGTGACATCT
TFmatrixID_0278		LOC_Os01g14050	+	1968	1977	2.12e-05	0.821	TGTGACATCT
TFmatrixID_0278		LOC_Os08g29720	+	244	253	2.19e-05	0.821	GCTGACAGCT
TFmatrixID_0278		LOC_Os05g36270	+	727	736	2.19e-05	0.821	GCTGACAGCT
TFmatrixID_0278		LOC_Os03g05290	-	1579	1588	2.19e-05	0.821	GCTGACAGCT
TFmatrixID_0278		LOC_Os01g62430	+	1773	1782	2.19e-05	0.821	GCTGACAGCT
TFmatrixID_0278		LOC_Os10g25230	-	1984	1993	2.19e-05	0.821	GCTGACAGCT
TFmatrixID_0278		LOC_Os01g50760	+	47	56	2.3e-05	0.821	ATTGACAGGT
TFmatrixID_0278		LOC_Os03g62640	+	109	118	2.3e-05	0.821	ATTGACAGGT
TFmatrixID_0278		LOC_Os02g31867	+	687	696	2.3e-05	0.821	ATTGACAGGT
TFmatrixID_0278		LOC_Os01g48330	-	738	747	2.3e-05	0.821	ATTGACAGGT
TFmatrixID_0278		LOC_Os04g07280	+	867	876	2.3e-05	0.821	ATTGACAGGT
TFmatrixID_0278		LOC_Os09g25060	-	922	931	2.3e-05	0.821	ATTGACAGGT
TFmatrixID_0278		LOC_Os01g24750	+	1085	1094	2.3e-05	0.821	ATTGACAGGT
TFmatrixID_0278		LOC_Os01g33050	+	1151	1160	2.3e-05	0.821	ATTGACAGGT
TFmatrixID_0278		LOC_Os03g43890	+	1577	1586	2.3e-05	0.821	ATTGACAGGT
TFmatrixID_0278		LOC_Os08g19420	+	1776	1785	2.3e-05	0.821	ATTGACAGGT
TFmatrixID_0278		LOC_Os09g38520	-	1955	1964	2.3e-05	0.821	ATTGACAGGT
TFmatrixID_0278		LOC_Os02g50960	+	136	145	2.36e-05	0.821	GGTGACAGCC
TFmatrixID_0278		LOC_Os09g28440	-	283	292	2.36e-05	0.821	GGTGACAGCC
TFmatrixID_0278		LOC_Os03g42240	-	317	326	2.36e-05	0.821	GGTGACAGCC
TFmatrixID_0278		LOC_Os01g35050	+	762	771	2.36e-05	0.821	GGTGACAGCC
TFmatrixID_0278		LOC_Os04g40700	-	805	814	2.36e-05	0.821	GGTGACAGCC
TFmatrixID_0278		LOC_Os01g31690	+	1147	1156	2.36e-05	0.821	GGTGACAGCC
TFmatrixID_0278		LOC_Os02g30850	+	1201	1210	2.36e-05	0.821	GGTGACAGCC
TFmatrixID_0278		LOC_Os08g34640	+	1234	1243	2.36e-05	0.821	GGTGACAGCC
TFmatrixID_0278		LOC_Os06g23160	+	1652	1661	2.36e-05	0.821	GGTGACAGCC
TFmatrixID_0278		LOC_Os08g17160	+	1674	1683	2.36e-05	0.821	GGTGACAGCC
TFmatrixID_0278		LOC_Os06g04830	-	1737	1746	2.36e-05	0.821	GGTGACAGCC
TFmatrixID_0278		LOC_Os04g38870	-	1749	1758	2.36e-05	0.821	GGTGACAGCC
TFmatrixID_0278		LOC_Os07g47360	+	153	162	2.45e-05	0.821	TCTGACAGCT
TFmatrixID_0278		LOC_Os08g36860	+	628	637	2.45e-05	0.821	TCTGACAGCT
TFmatrixID_0278		LOC_Os05g32660	-	676	685	2.45e-05	0.821	TCTGACAGCT
TFmatrixID_0278		LOC_Os05g48040	-	692	701	2.45e-05	0.821	TCTGACAGCT
TFmatrixID_0278		LOC_Os03g62340	+	1030	1039	2.45e-05	0.821	TCTGACAGCT
TFmatrixID_0278		LOC_Os02g51500	+	1066	1075	2.45e-05	0.821	TCTGACAGCT
TFmatrixID_0278		LOC_Os05g39120	-	1464	1473	2.45e-05	0.821	TCTGACAGCT
TFmatrixID_0278		LOC_Os04g57200	+	1562	1571	2.45e-05	0.821	TCTGACAGCT
TFmatrixID_0278		LOC_Os01g38620	-	1626	1635	2.45e-05	0.821	TCTGACAGCT
TFmatrixID_0278		LOC_Os02g44860	+	1651	1660	2.45e-05	0.821	TCTGACAGCT
TFmatrixID_0278		LOC_Os03g08870	-	1735	1744	2.45e-05	0.821	TCTGACAGCT
TFmatrixID_0278		LOC_Os04g56580	+	1826	1835	2.45e-05	0.821	TCTGACAGCT
TFmatrixID_0278		LOC_Os01g38620	-	1904	1913	2.45e-05	0.821	TCTGACAGCT
TFmatrixID_0278		LOC_Os01g52530	+	98	107	2.62e-05	0.821	TGTGACAGCC
TFmatrixID_0278		LOC_Os06g33710	-	293	302	2.62e-05	0.821	ATTGACGGCT
TFmatrixID_0278		LOC_Os06g36560	+	399	408	2.62e-05	0.821	TGTGACAGCC
TFmatrixID_0278		LOC_Os04g58564	-	414	423	2.62e-05	0.821	ATTGACGGCT
TFmatrixID_0278		LOC_Os06g47550	-	562	571	2.62e-05	0.821	TGTGACAGCC
TFmatrixID_0278		LOC_Os02g42940	-	633	642	2.62e-05	0.821	TGTGACAGCC
TFmatrixID_0278		LOC_Os01g73990	-	697	706	2.62e-05	0.821	TGTGACAGCC
TFmatrixID_0278		LOC_Os01g08410	+	972	981	2.62e-05	0.821	TGTGACAGCC
TFmatrixID_0278		LOC_Os01g01920	-	1127	1136	2.62e-05	0.821	ATTGACGGCT
TFmatrixID_0278		LOC_Os07g42700	-	1310	1319	2.62e-05	0.821	TGTGACAGCC
TFmatrixID_0278		LOC_Os10g43040	-	1630	1639	2.62e-05	0.821	TGTGACAGCC
TFmatrixID_0278		LOC_Os03g05420	-	1718	1727	2.62e-05	0.821	ATTGACGGCT
TFmatrixID_0278		LOC_Os05g06814	-	1897	1906	2.62e-05	0.821	TGTGACAGCC
TFmatrixID_0278		LOC_Os04g42620	+	1922	1931	2.62e-05	0.821	ATTGACGGCT
TFmatrixID_0278		LOC_Os01g69920	-	1943	1952	2.62e-05	0.821	TGTGACAGCC
TFmatrixID_0278		LOC_Os02g43790	+	1953	1962	2.62e-05	0.821	TGTGACAGCC
TFmatrixID_0278		LOC_Os09g26400	+	44	53	2.68e-05	0.821	CGTGACGGGT
TFmatrixID_0278		LOC_Os01g15270	+	95	104	2.68e-05	0.821	CGTGACGGGT
TFmatrixID_0278		LOC_Os03g25770	+	100	109	2.68e-05	0.821	CGTGACGGGT
TFmatrixID_0278		LOC_Os02g04640	+	434	443	2.68e-05	0.821	CGTGACGGGT
TFmatrixID_0278		LOC_Os02g04130	+	459	468	2.68e-05	0.821	CGTGACGGGT
TFmatrixID_0278		LOC_Os02g48740	+	956	965	2.68e-05	0.821	CGTGACGGGT
TFmatrixID_0278		LOC_Os07g42700	-	1279	1288	2.68e-05	0.821	CGTGACGGGT
TFmatrixID_0278		LOC_Os08g36910	-	1462	1471	2.68e-05	0.821	CGTGACGGGT
TFmatrixID_0278		LOC_Os03g56260	+	1596	1605	2.68e-05	0.821	CGTGACGGGT
TFmatrixID_0278		LOC_Os02g54780	-	1680	1689	2.68e-05	0.821	CGTGACGGGT
TFmatrixID_0278		LOC_Os03g18740	-	1779	1788	2.68e-05	0.821	CGTGACGGGT
TFmatrixID_0278		LOC_Os02g02910	-	1852	1861	2.68e-05	0.821	CGTGACGGGT
TFmatrixID_0278		LOC_Os04g52074	-	1928	1937	2.68e-05	0.821	CGTGACGGGT
TFmatrixID_0278		LOC_Os04g52060	-	1985	1994	2.68e-05	0.821	CGTGACGGGT
TFmatrixID_0278		LOC_Os09g20350	-	96	105	2.86e-05	0.821	AGTGACATCT
TFmatrixID_0278		LOC_Os07g28610	+	143	152	2.86e-05	0.821	AGTGACATCT
TFmatrixID_0278		LOC_Os01g15790	-	214	223	2.86e-05	0.821	AGTGACATCT
TFmatrixID_0278		LOC_Os05g01520	+	578	587	2.86e-05	0.821	GTTGACGGGT
TFmatrixID_0278		LOC_Os03g58740	+	658	667	2.86e-05	0.821	AGTGACATCT
TFmatrixID_0278		LOC_Os03g49400	+	715	724	2.86e-05	0.821	GTTGACGGGT
TFmatrixID_0278		LOC_Os10g39810	+	737	746	2.86e-05	0.821	GTTGACGGGT
TFmatrixID_0278		LOC_Os11g04830	-	916	925	2.86e-05	0.821	GTTGACGGGT
TFmatrixID_0278		LOC_Os10g29150	-	956	965	2.86e-05	0.821	GTTGACGGGT
TFmatrixID_0278		LOC_Os05g01530	+	1056	1065	2.86e-05	0.821	GTTGACGGGT
TFmatrixID_0278		LOC_Os08g10430	+	1059	1068	2.86e-05	0.821	AGTGACATCT
TFmatrixID_0278		LOC_Os01g09770	+	1065	1074	2.86e-05	0.821	GTTGACGGGT
TFmatrixID_0278		LOC_Os01g56330	+	1106	1115	2.86e-05	0.821	GTTGACGGGT
TFmatrixID_0278		LOC_Os02g13300	+	1141	1150	2.86e-05	0.821	AGTGACATCT
TFmatrixID_0278		LOC_Os01g70190	-	1278	1287	2.86e-05	0.821	GTTGACGGGT
TFmatrixID_0278		LOC_Os06g36740	-	1621	1630	2.86e-05	0.821	AGTGACATCT
TFmatrixID_0278		LOC_Os02g05630	+	1747	1756	2.86e-05	0.821	GTTGACGGGT
TFmatrixID_0278		LOC_Os03g21000	-	1801	1810	2.86e-05	0.821	AGTGACATCT
TFmatrixID_0278		LOC_Os03g12030	+	1980	1989	2.86e-05	0.821	GTTGACGGGT
TFmatrixID_0278		LOC_Os09g35910	+	46	55	2.96e-05	0.821	GGTGACATGT
TFmatrixID_0278		LOC_Os02g21630	-	53	62	2.96e-05	0.821	GGTGACATGT
TFmatrixID_0278		LOC_Os11g31900	+	122	131	2.96e-05	0.821	GGTGACATGT
TFmatrixID_0278		LOC_Os06g15420	+	127	136	2.96e-05	0.821	GGTGACATGT
TFmatrixID_0278		LOC_Os07g12530	+	334	343	2.96e-05	0.821	GGTGACATGT
TFmatrixID_0278		LOC_Os08g40090	+	502	511	2.96e-05	0.821	GGTGACATGT
TFmatrixID_0278		LOC_Os04g31610	+	550	559	2.96e-05	0.821	GGTGACATGT
TFmatrixID_0278		LOC_Os05g49140	-	618	627	2.96e-05	0.821	GGTGACATGT
TFmatrixID_0278		LOC_Os07g07690	+	691	700	2.96e-05	0.821	GGTGACATGT
TFmatrixID_0278		LOC_Os02g27850	-	695	704	2.96e-05	0.821	GGTGACATGT
TFmatrixID_0278		LOC_Os09g24954	+	761	770	2.96e-05	0.821	GGTGACATGT
TFmatrixID_0278		LOC_Os06g49930	-	753	762	2.96e-05	0.821	GGTGACATGT
TFmatrixID_0278		LOC_Os05g33810	-	786	795	2.96e-05	0.821	GGTGACATGT
TFmatrixID_0278		LOC_Os12g06290	+	805	814	2.96e-05	0.821	GGTGACATGT
TFmatrixID_0278		LOC_Os10g33720	-	808	817	2.96e-05	0.821	GGTGACATGT
TFmatrixID_0278		LOC_Os02g43740	+	840	849	2.96e-05	0.821	GGTGACATGT
TFmatrixID_0278		LOC_Os04g40870	-	840	849	2.96e-05	0.821	GGTGACATGT
TFmatrixID_0278		LOC_Os05g34260	+	1071	1080	2.96e-05	0.821	GGTGACATGT
TFmatrixID_0278		LOC_Os09g38320	-	1220	1229	2.96e-05	0.821	GGTGACATGT
TFmatrixID_0278		LOC_Os04g47620	+	1244	1253	2.96e-05	0.821	GGTGACATGT
TFmatrixID_0278		LOC_Os02g52250	-	1385	1394	2.96e-05	0.821	GGTGACATGT
TFmatrixID_0278		LOC_Os08g42320	-	1472	1481	2.96e-05	0.821	GGTGACATGT
TFmatrixID_0278		LOC_Os08g37444	-	1522	1531	2.96e-05	0.821	GGTGACATGT
TFmatrixID_0278		LOC_Os08g33420	-	1568	1577	2.96e-05	0.821	GGTGACATGT
TFmatrixID_0278		LOC_Os02g38480	+	1742	1751	2.96e-05	0.821	GGTGACATGT
TFmatrixID_0278		LOC_Os02g38480	-	1746	1755	2.96e-05	0.821	GGTGACATGT
TFmatrixID_0278		LOC_Os02g32660	+	1838	1847	2.96e-05	0.821	GGTGACATGT
TFmatrixID_0278		LOC_Os05g39610	+	1989	1998	2.96e-05	0.821	GGTGACATGT
TFmatrixID_0278		LOC_Os03g62700	+	109	118	3.05e-05	0.821	CTTGACAGGT
TFmatrixID_0278		LOC_Os10g27340	-	706	715	3.05e-05	0.821	CTTGACAGGT
TFmatrixID_0278		LOC_Os04g57810	+	827	836	3.05e-05	0.821	CTTGACAGGT
TFmatrixID_0278		LOC_Os01g15110	+	902	911	3.05e-05	0.821	CTTGACAGGT
TFmatrixID_0278		LOC_Os02g35830	+	1080	1089	3.05e-05	0.821	CTTGACAGGT
TFmatrixID_0278		LOC_Os05g31920	-	1294	1303	3.05e-05	0.821	CTTGACAGGT
TFmatrixID_0278		LOC_Os01g50616	-	1436	1445	3.05e-05	0.821	CTTGACAGGT
TFmatrixID_0278		LOC_Os08g43334	-	1558	1567	3.05e-05	0.821	CTTGACAGGT
TFmatrixID_0278		LOC_Os10g19880	-	1708	1717	3.05e-05	0.821	CTTGACAGGT
TFmatrixID_0278		LOC_Os03g07510	+	210	219	3.14e-05	0.821	TTTGACGGGT
TFmatrixID_0278		LOC_Os03g59340	+	301	310	3.14e-05	0.821	TTTGACGGGT
TFmatrixID_0278		LOC_Os01g62890	-	389	398	3.14e-05	0.821	TTTGACGGGT
TFmatrixID_0278		LOC_Os03g22160	+	758	767	3.14e-05	0.821	TTTGACGGGT
TFmatrixID_0278		LOC_Os10g30910	-	869	878	3.14e-05	0.821	TTTGACGGGT
TFmatrixID_0278		LOC_Os03g56320	-	1896	1905	3.14e-05	0.821	TTTGACGGGT
