# Supplementary material for: VPB1 Encoding BELL-like Homeodomain Protein Is Involved in Rice Panicle Architecture
Source: Int J Mol Sci. 2021 Jul 24;22(15):7909. doi: 10.3390/ijms22157909 (PMC8348756; doi:10.3390/ijms22157909)
Supplement: Supplementary file 1 [file ijms-22-07909-s001.zip › Table S4 Primers used in this study.xls]

## Sheet: Sheet1
Expriment	Primer Name	Forward primer(5'-3')	Reverse primer(5'-3')
Mapping for VPB1	RM3575	ACAGCCTCAAATTGTGAGCAAGG	GCTGTATGATCTGTATCCATCCATCC
	RM7446	CGTTGAGCCAAGAAGAAGAAAGG	TTTGAAGGCAGTTTCACTGACG
	RM3348	CTTCTCGGTTCATCCAAAGAGC	GTGGAAGCTATGGGTAGCTCACG
	RM18786	GTATGTATGTAGGGATGCGCTAAACC	ACACGCTGATTGCAACTGAAGG
	RM18803	TTGGTGGTGTAGATTCGGAGTGG	TCCTCCTCCTCCAAGAAACAATCC
	RM3327	GGGCAACAGCAGACACGTACC	CGCATCACTATCTTCCCAATCTCG
	RM6504	AGGCTCTTCGGCTTCATCTCC	GGTCTCTGATCAGTTTGCTTTGG
	RM3295	AGACACGGCAAGGACAAAGC	CGTTCGGACTCCTTTGGATAGC
	RM18810	GGAGGGAGTAGATAGATGCTGTTCG	GTAGCGCATGTCATTTCCAAGG
	INDEL22.30	GCTTAGTCGCGCCAAAAAGG	CTCTCCCTTCCCTTGCTACG
	INDEL22.31	ACCATCTGCAGTGGGGAAAT	ATTCCTGTTCTTGGGCATGC
	INDEL22.32	AGTGGGCATCAACTTTATAGCA	TGGGATAAATGTGCTTATACGATGG
	RM3759	CGTGCACAAACGAATTGACAAGG	CAGATGCTGGTGCGGATCTGG
Genotyping of vpb1	VPB1-CS-P1,P2	TGTCAAATATGATCCTCGTT	TTTTACACCGACAAGGGT
Vector constructions	PC2301-VPB1-P1	TCGAGCTCGGTACCC CAAGAAAATGAATAAGGGTG	ACCCTGTGGTGGAAGGGGTGAG
	PC2301-VPB1-P2	CTCACCCCTTCCACCACAGGGT	CAATGACTTGTGTAAACCATGCACTAAAAC
	PC2301-VPB1-P3	GTTTTAGTGCATGGTTTACACAAGTCATTG	CTCTAGAGGATCCCCCCACGCGAAAAAGAACGTGCAT
	VPB1-OX	AAA GGTACCATGTCGTCCGCCGCGGG	AAA TCTAGAACCAACAAAGTCATGGAGCAAATGGC
	PM999-YFP-VPB1	AAA GGTACCATGTCGTCCGCCGCGGG	AAA TCTAGAACCAACAAAGTCATGGAGCAAATGGC
	BK-VPB1-FL	AAAGGATCCGT ATGTCGTCCGCCGCGGG	AAAGGATCCTCAACCAACAAAGTCATGGAGCAAAT
	BK-VPB1-P1	AAA CATATG ATGTCGTCCGCCGCGGG	AAA GAATTC GAAGGGCCCGTACGGCCC
	BK-VPB1-P2	AAA CATATG ATGTCGTCCGCCGCGG	AAA GAATTC GTTCAGTATAATGCCCTTCAAATACTTG
	BK-VPB1-P3	AAA CATATG ATGTCGTCCGCCGCG	AAA GAATTC TATGTTGTGAGGTTGGCTAAACG
	BK-VPB1-P4	AAA GGATCC GT ATGTCGTCCGCCGCGG	AAA CTGCAG TTCTTCAACCATTGGCTTCCAGAG
	BK-VPB1-P5	AAA GGATCC GT ACGGGCTACGCCGCCGT	AAA GGATCC TCAACCAACAAAGTCATGGAGCAAAT
	BK-VPB1-P6	AAA CATATG CGCCCGCAAAGAGGGCTAC	AAA GAATTC TCAACCAACAAAGTCATGGAGC
	AD-OSH1-FL	AAA CATATG ATGGAGGAGATCTCCCACCAC	AAA GAATTC CTAGCCGAGCCTGTAGAGGC
	AD-OSH15-FL	AAA CATATG ATGGATCAGAGCTTTGGGAATCT	AAA GAATTC TCACGAACCGAGGCGGTAC
	VPB1-nCFP	AAA GGATCC ATGTCGTCCGCCGCGGG	AAA GGTACC ACCAACAAAGTCATGGAGCAAATGGC
	OSH1-cCFP	AAA GGATCC ATGGAGGAGATCTCCCACCAC	AAA GGTACC GCCGAGCCTGTAGAGGCC
	OSH15-cCFP	AAA GGTACC ATGGATCAGAGCTTTGGGAATC	AAA GGATCC TCACGAACCGAGGCGGTA
	MBP-VPB1	GAGGGAAGGATTTCAGAATTC ATGTCGTCCGCCGCGGG	CAAGCTTGCCTGCAGGTCGAC TCAACCAACAAAGTCATGGAGC
	GST-OSH1	AAA GGATCC ATGGAGGAGATCTCCCACCAC	AAA GAATTC CTAGCCGAGCCTGTAGAGGC
	GST-OSH15	AAA GGATCC ATGGATCAGAGCTTTGGGAATCT	AAA GAATTC TCACGAACCGAGGCGGTAC
	GAL4DB-VPB1	TCCCCCGGGCTGCAGGAATTC ATGTCGTCCGCCGCGGG	GGGCCCCCCCTCGAGGTCGAC TCAACCAACAAAGTCATGGAGC
	NONE-VPB1	cccccgggctgcaggaattc ATGTCGTCCGCCGCGGG	ggccccccctcgaggtcgac TCAACCAACAAAGTCATGGAGC
	35S-CGFP-VPB1	AAA GGTACC ATGTCGTCCGCCGCGGG	AAA GGATCC ACCAACAAAGTCATGGAGCAAAT
	190LUC-OsBOP1	GCCAGTGCCAAGCTT TTCTTATCATTTAATTCATTG	TGCAGATCTAAGCTT TGTCTTAGAGGGAGGGG
	PFA1300-OsBOP1	AAAGGTACCAGATGAGCGGTCAAATATGTG	AAA GTCGAC TGTCTTAGAGGGAGGGGGT
CRISPR/cas9	VPB1-U3	GGCA AGCGTCGACCACGAGATGGA	AAACTCCATCTCGTGGTCGACGCT
	VPB1-U6a	GCCG GAAGCATTTCAAGTATTTGA	AAACTCAAATACTTGAAATGCTTC
	cas9-vpb1-D	GTTGGTGGCGCATGGGAT	AGCACGCTCTGGTAGCCCTC
	OsBOP1-U3	GGCA GCTCCAGCTCATCGGAGGC	AAAC GCCTCCGATGAGCTGGAGC
	OsBOP1-U6a	GCCG GAGCTCGCCCTCCTCACCC	AAAC GGGTGAGGAGGGCGAGCTC
	cas9-osbop1-D	GAGCCAAGAAAGCAACAG	GCTGTTTTTTTCTTCTGTCTT
In situ hybridization	VPB1- in situ	CAGGCAATACTACCAGCAAC	ACCTGGTTCCTAGTTAATCC
	OsBOP1- in situ	CTGGTGCCGCAGAAGGGT	GTTGGGGTCGGCGTGGT
qRT-PCR	VPB1-qPCR	AGGCTCATCTCGCTTATGGA	TCTTCCTTGCCGAGACCATC
	OsBOP1- qPCR	TGAGCTTGGACAACAGGATG	TGAGCTTGGACAACAGGATG
	GNP1- qPCR	ATGGTTGAGACGATTCAAAC	GCGGGATTATTAACTCACGC
	OsNPY2- qPCR	CGGAGTGACTGAAGATGGGA	GAGAAAGACATCAATGGCGG
	SHAT1- qPCR	CAACCGCTACAGCAGCTGCA	GACGATGAATGCAGCGATCTTG
	SHO1- qPCR	TGTAAAGAGGAAGGGCCAAG	CTTCTTTTGGTAGGTGCCCA
	OsPIL1- qPCR	GCAAACAGTGCCACCACAGG	CTAAATTCCATCAGAGGTTGG
	OsSNB- qPCR	ATGGAAGGGAAGCTGTTACT	AATGTGGATGCTGGGACATC
	OsMADS1- qPCR	GCAACTACAACTCACAGGATGC	GATGAGCAACCATGTCTGCTGCT
	OsMADS3- qPCR	AACGCAAACAGTAGGACCATAGTG	CCCCTCTCATTCTCAACAACC
	OsMADS6- qPCR	AGAGAAAGACGCAACTGATGATGG	AGGCTTGCTGCATGGCTCTG
	OsMADS8- qPCR	CACCTTGCAGATCGGGTTTA	ATCTGTGTCGTCACATCCGT
	OsMADS58- qPCR	GAGCAAAGTTGCTGAGAGTG	GAGGCTGATGCATGATGTTG
	ASP1- qPCR	GCTATGTGCTTGGAGCATTG	AGTCCAACGGCTCCACCACA
	FON1- qPCR	TCCGCCATTGCTGGCTCCTA	TGTCCACGCCGTCACCGAAC
	ARF3-qPCR	TCAAAGATGCGCACACTGTC	CATGCAGCTTCGTGTATCAG
	ARF4-qPCR	AGACCGCATGCATCAATAGC	TCTGATTTGTTGGGCATCGG
	ARF12-qPCR	GAGGTGGATAAGGGATTGAC	CTTCATTCCGTCAGATGCAG
	ARF16-qPCR	ATGTGCACTCTGACTTCTGG	ATCATCAGAGGCACTACAGG
	ARF19-qPCR	ATGCTGCCAAGTACGAGAAC	CGCAGCATGACAATATGGAC
	ARF23-qPCR	TGAAGCCACTTGATACTCCG	ATGCATCGCGTTCTTGTCTC
	ARF25-qPCR	CCACAACTTCTCTAACCAGG	TGTGGCTTGCAGAATAGTCG
	UBQ-qPCR	AACCAGCTGAGGCCCAAGA	ACGATTGATTTAACCAGTCCATGA
